# Supplementary material
Source: MDPI journal article supplement (https://www.mdpi.com/2379-139X/7/4/73)

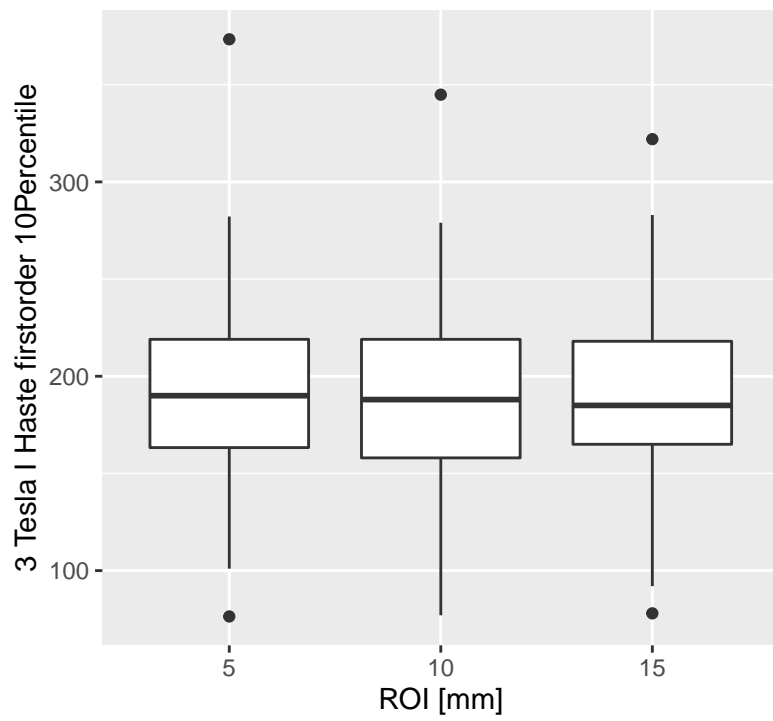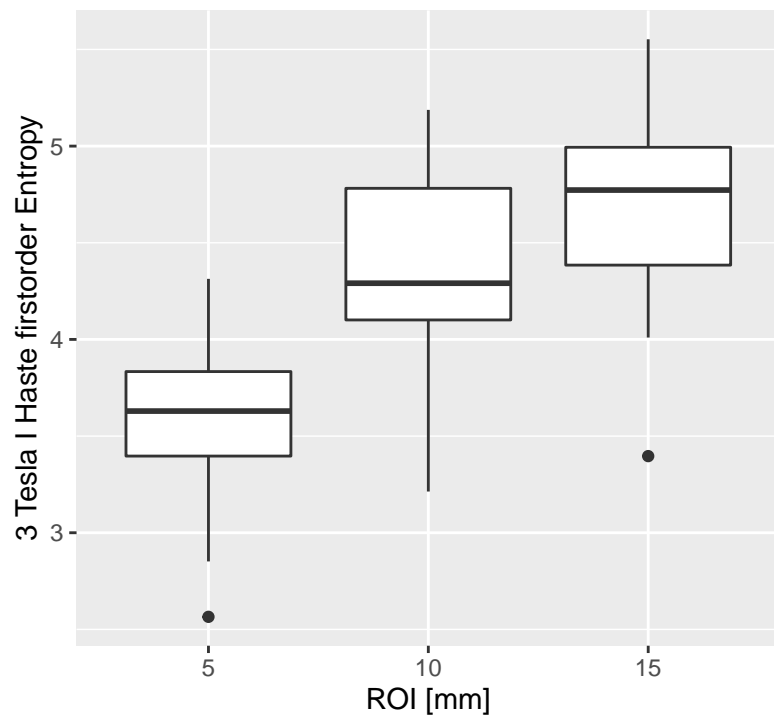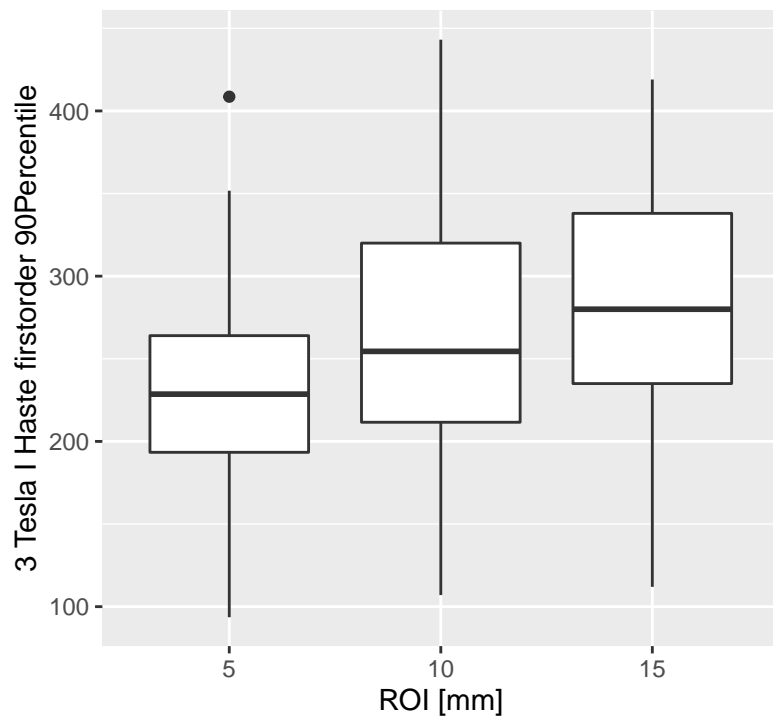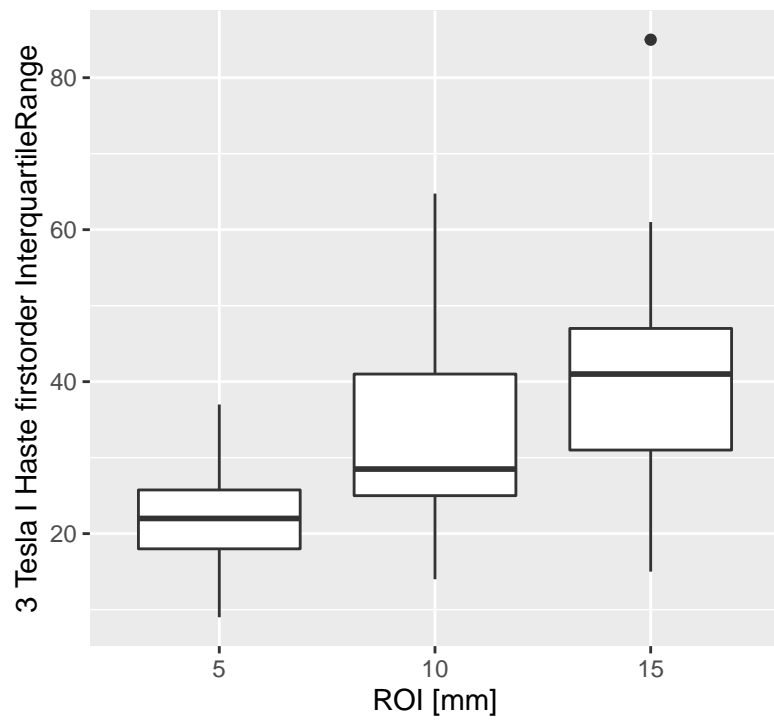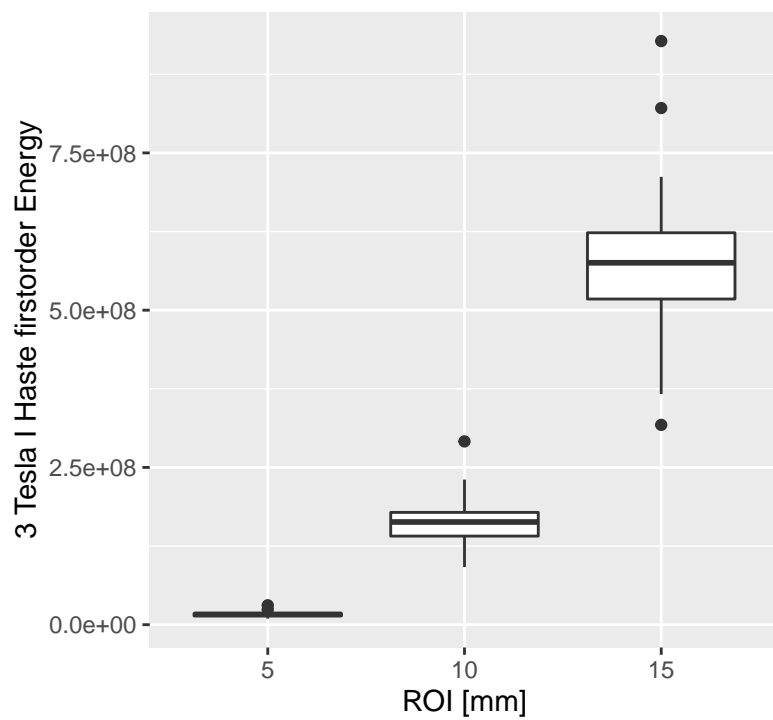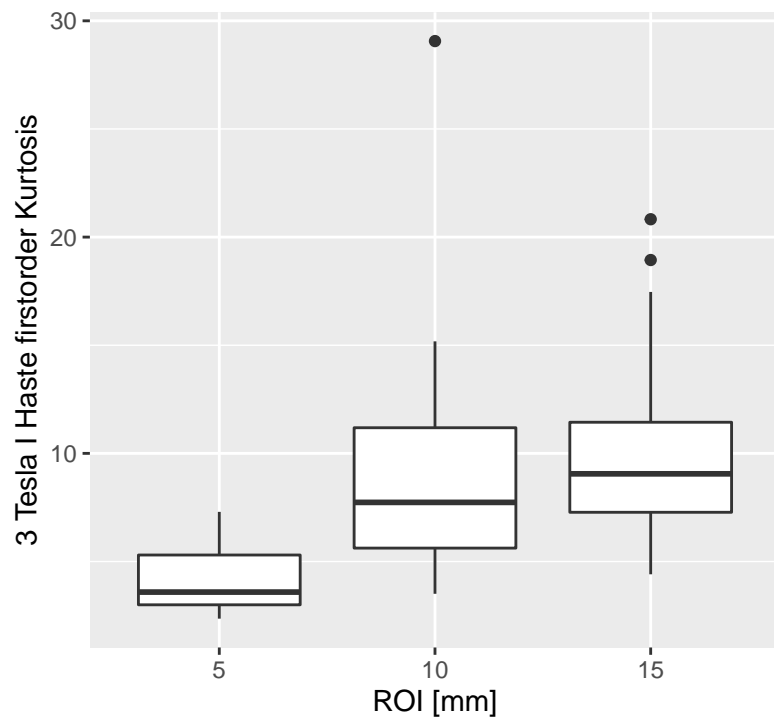

3 Tesla I Haste firstorder Maximum

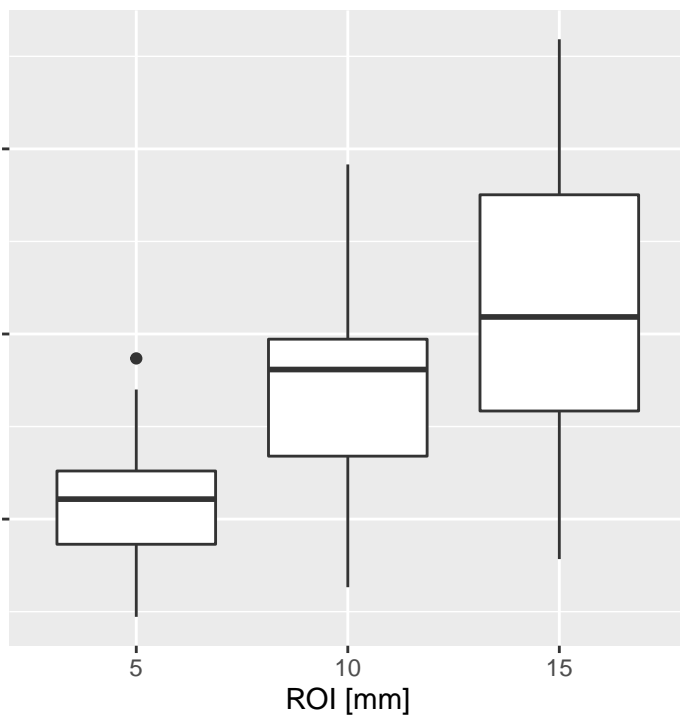

3 Tesla I Haste firstorder Median

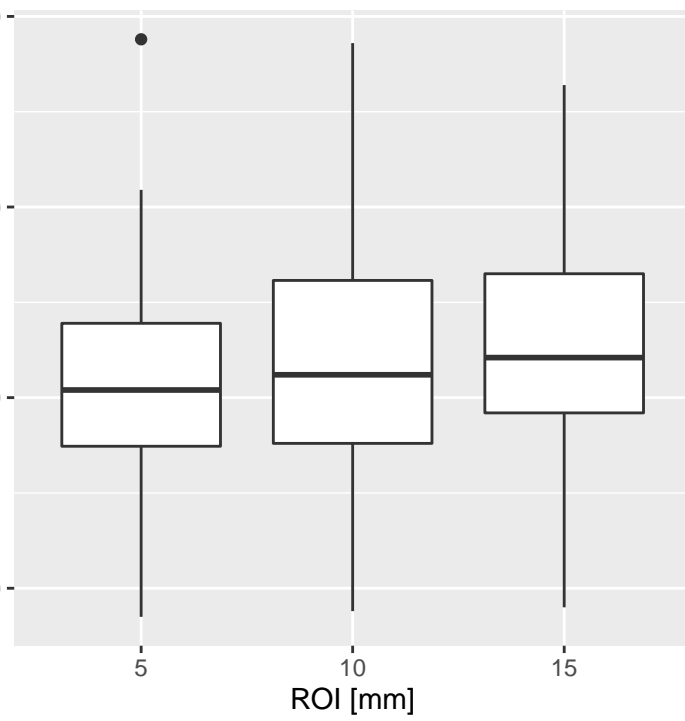

3 Tesla I Haste firstorder MeanAbsoluteDeviation

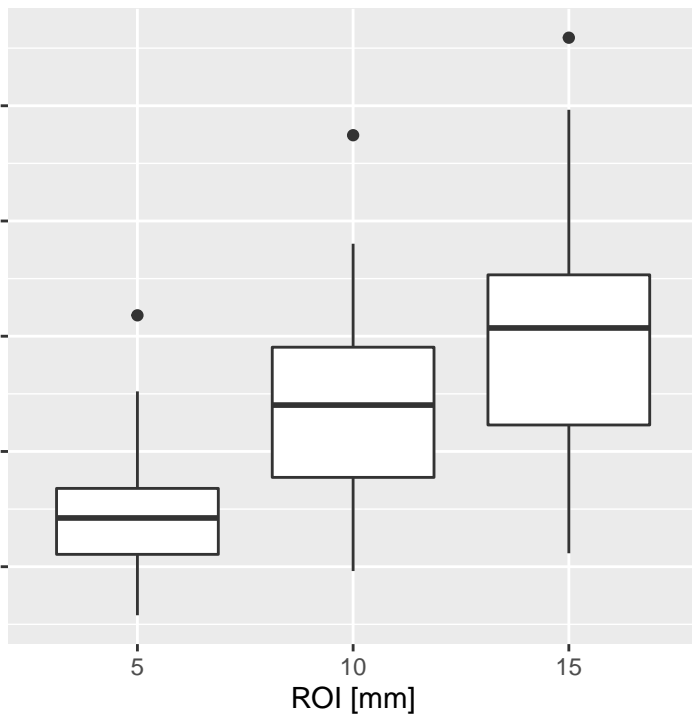

3 Tesla I Haste firstorder Minimum

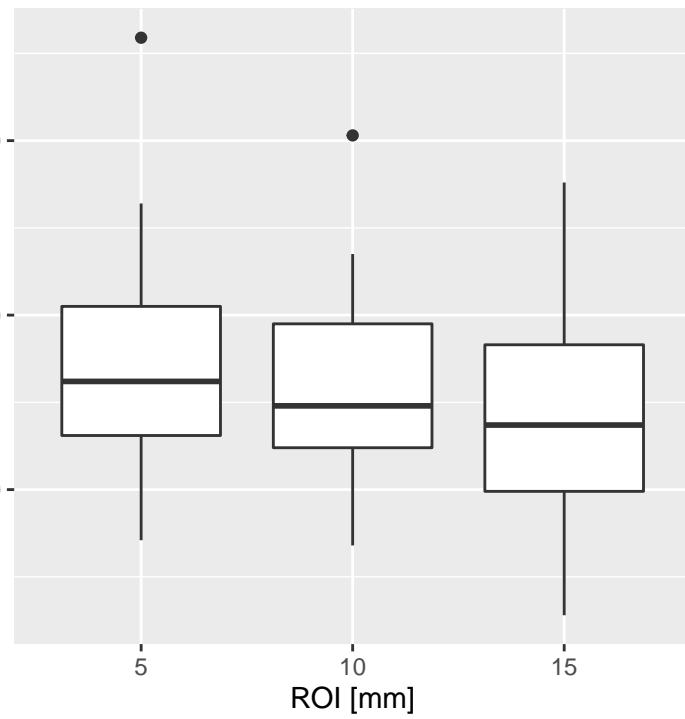

3 Tesla I Haste firstorder Mean

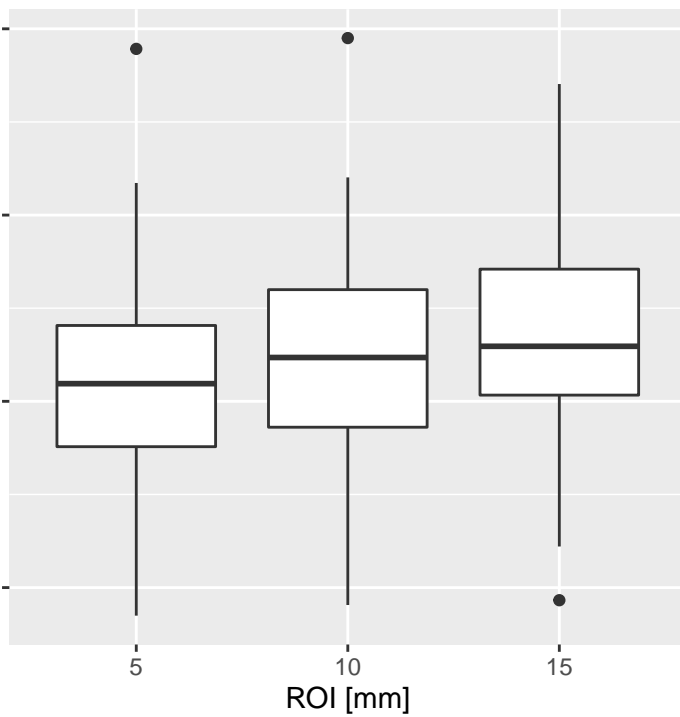

3 Tesla I Haste firstorder Range

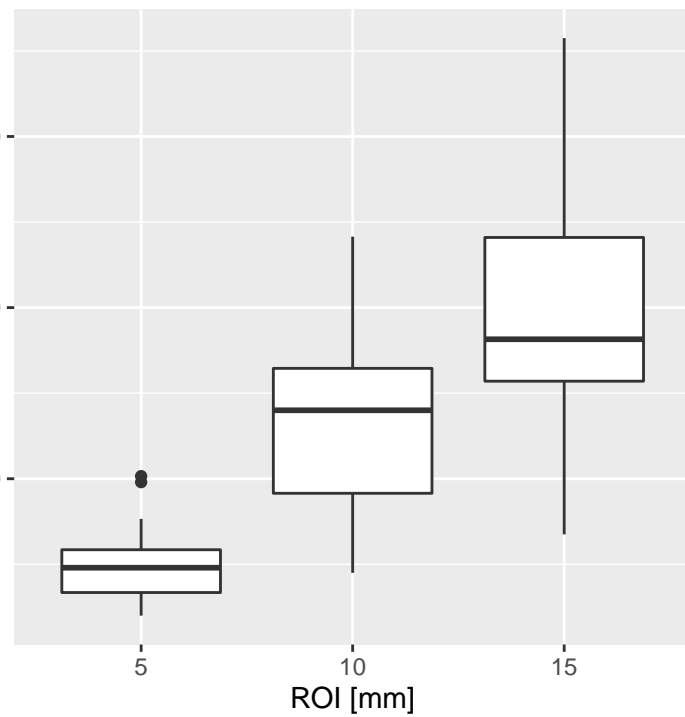

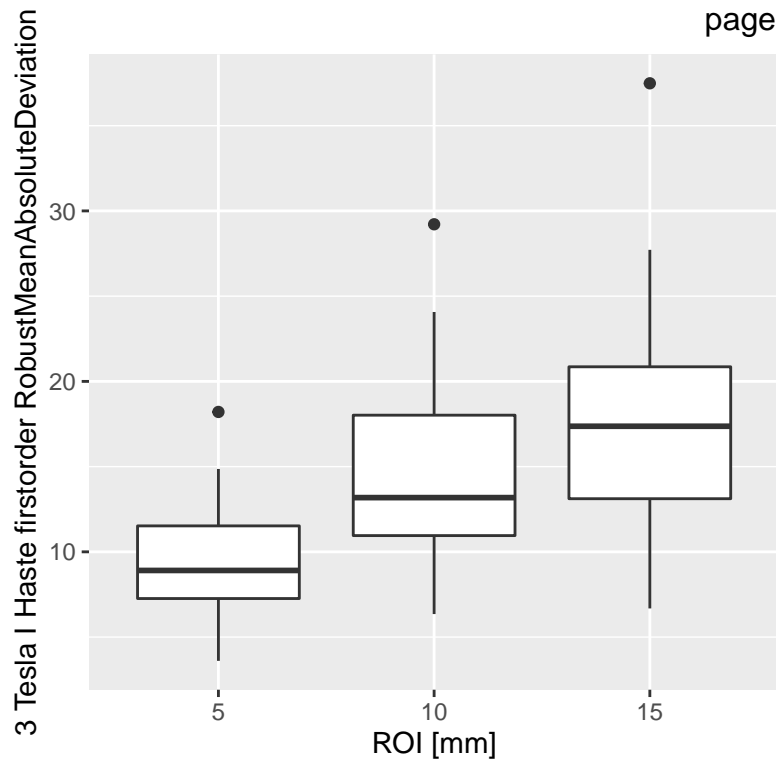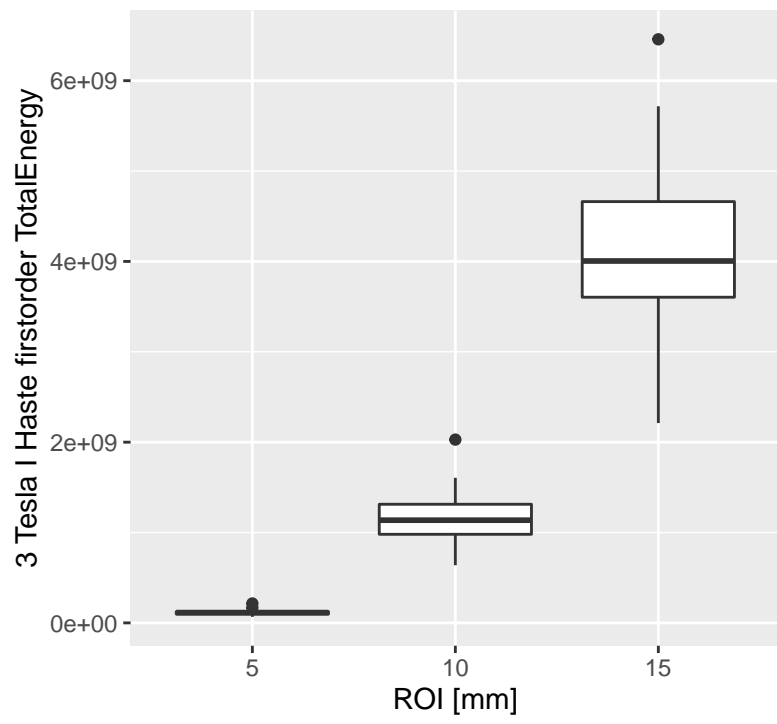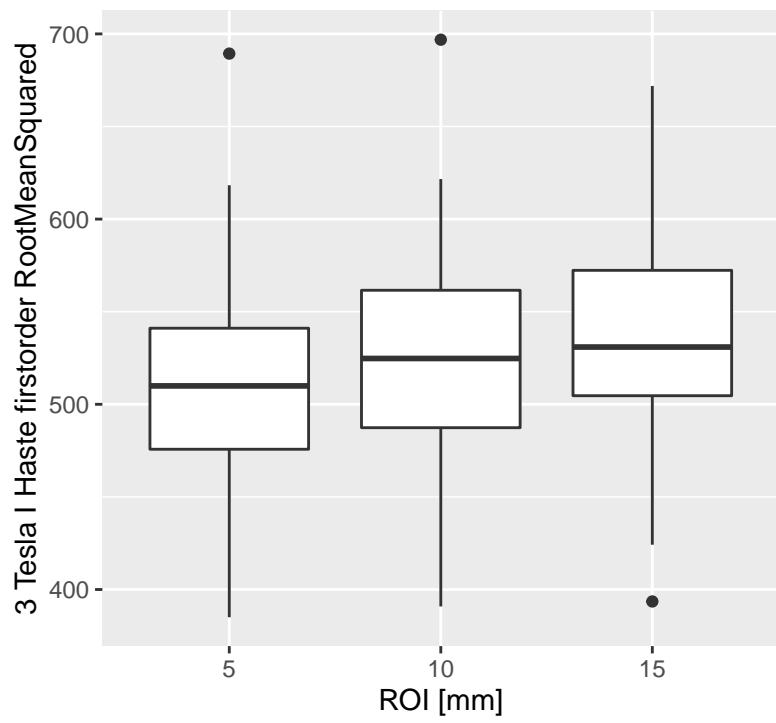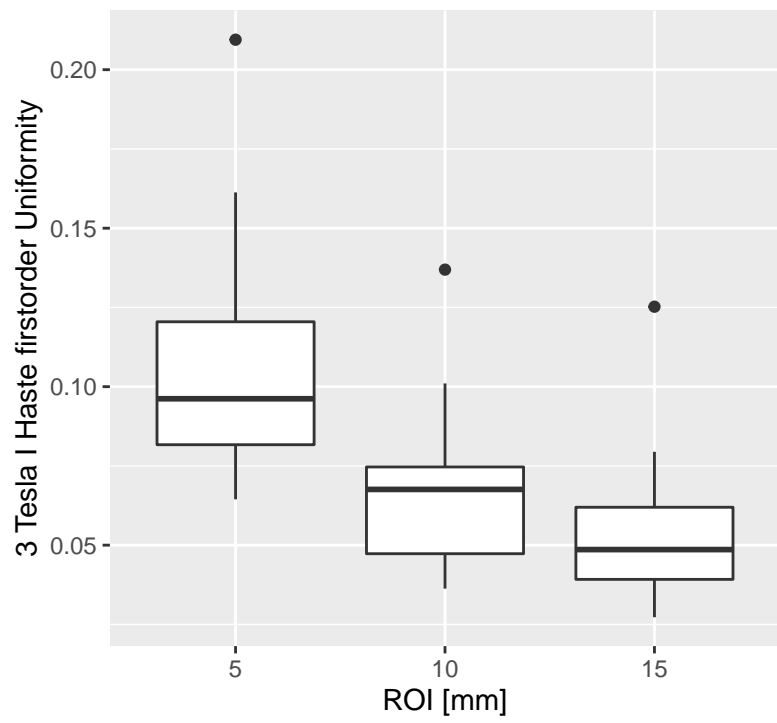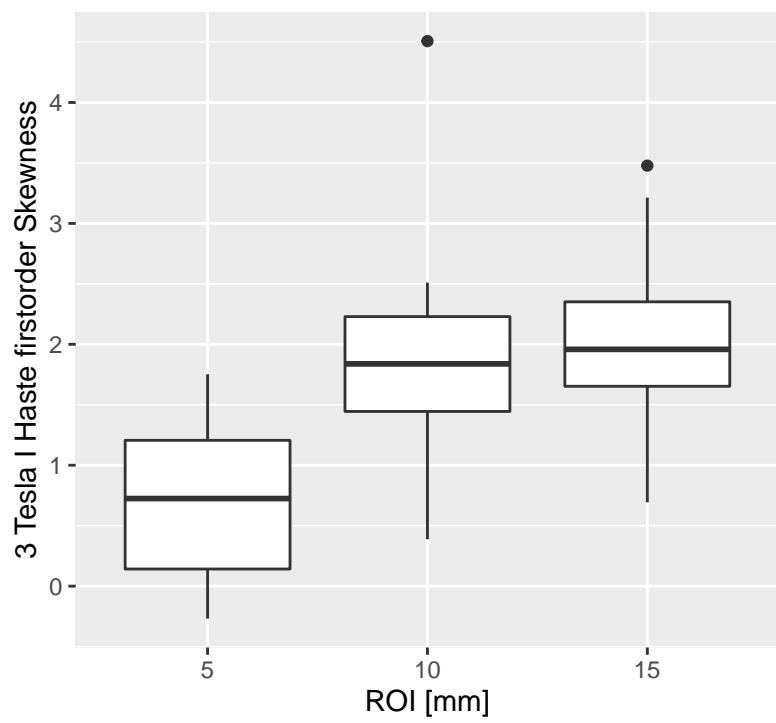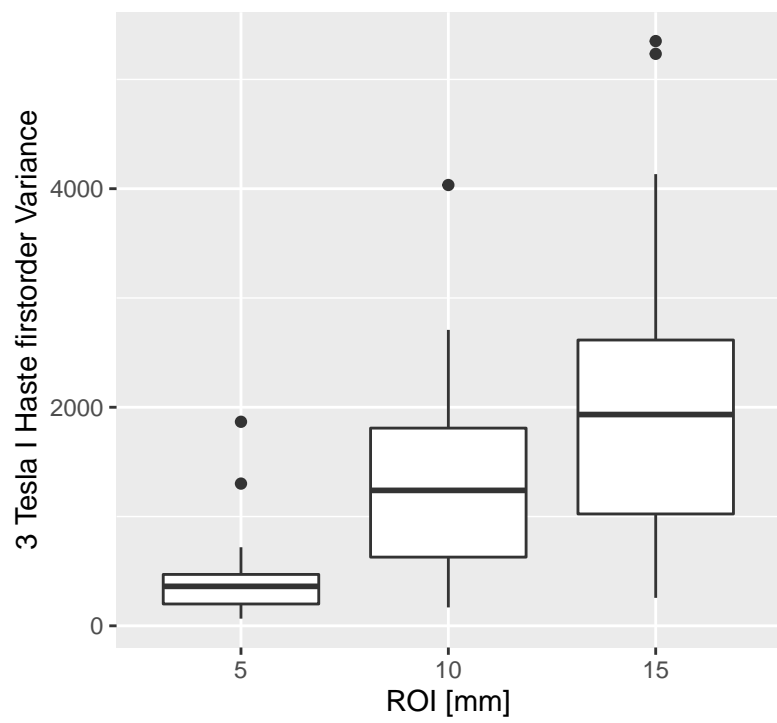

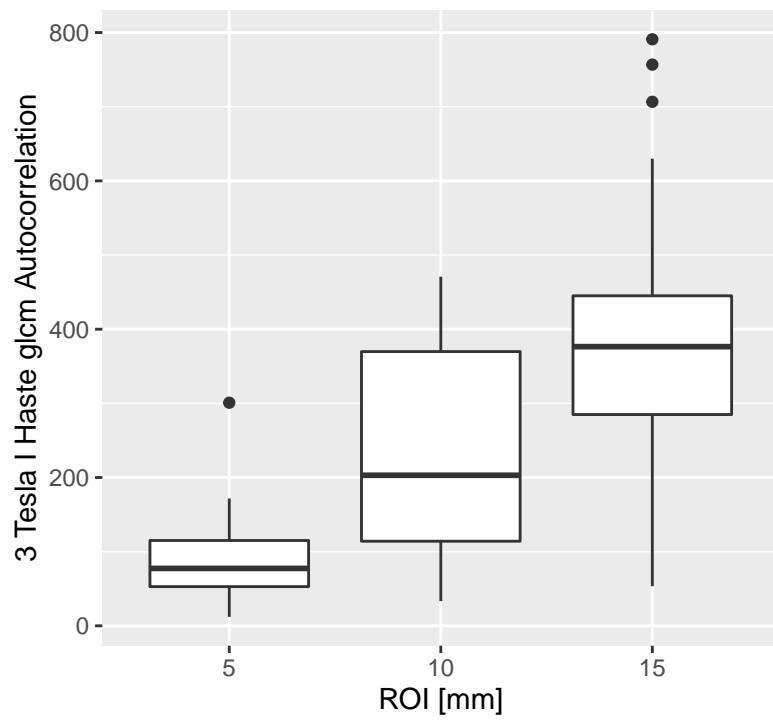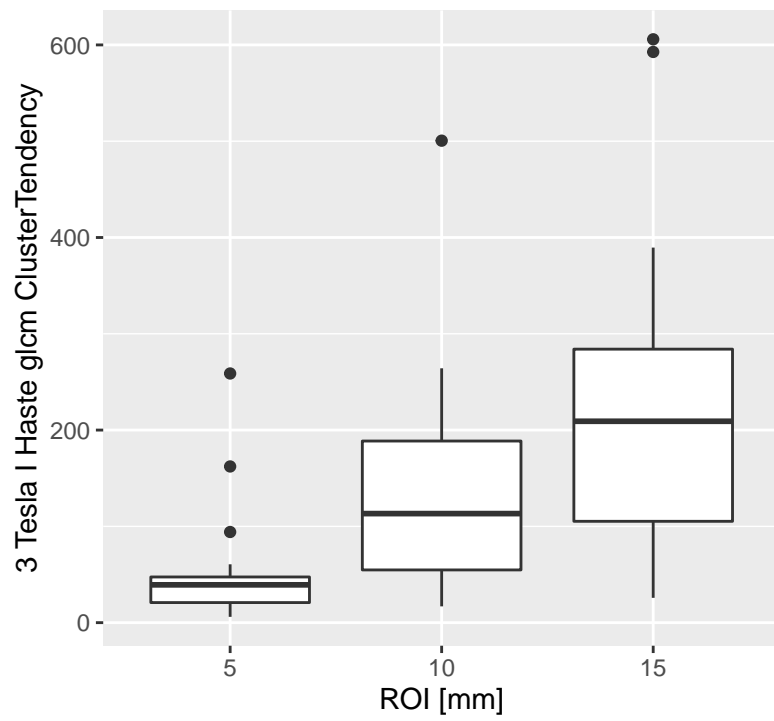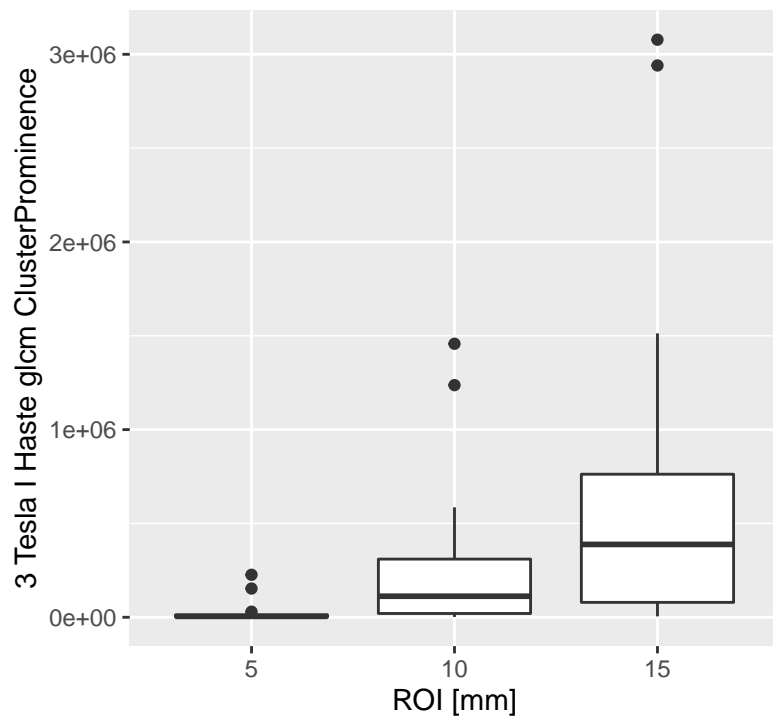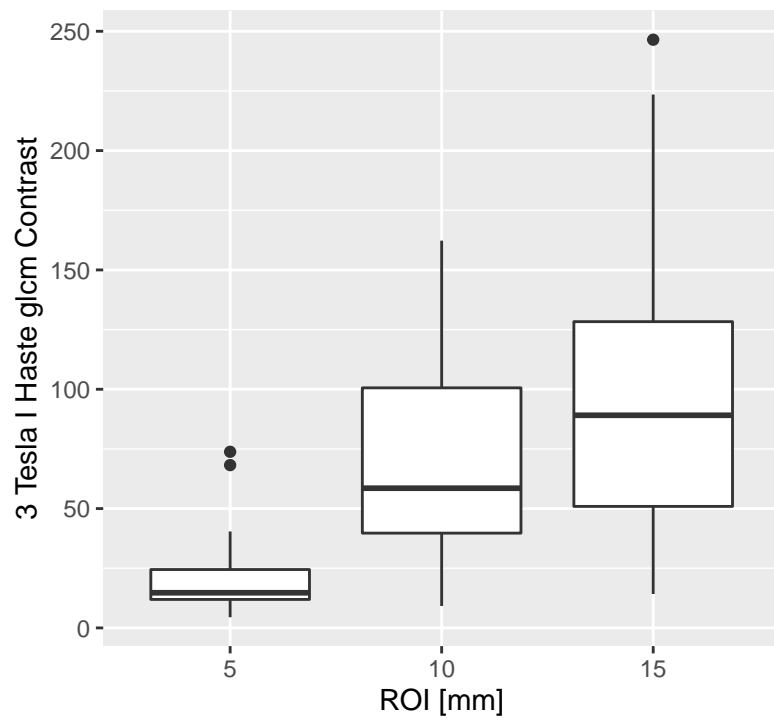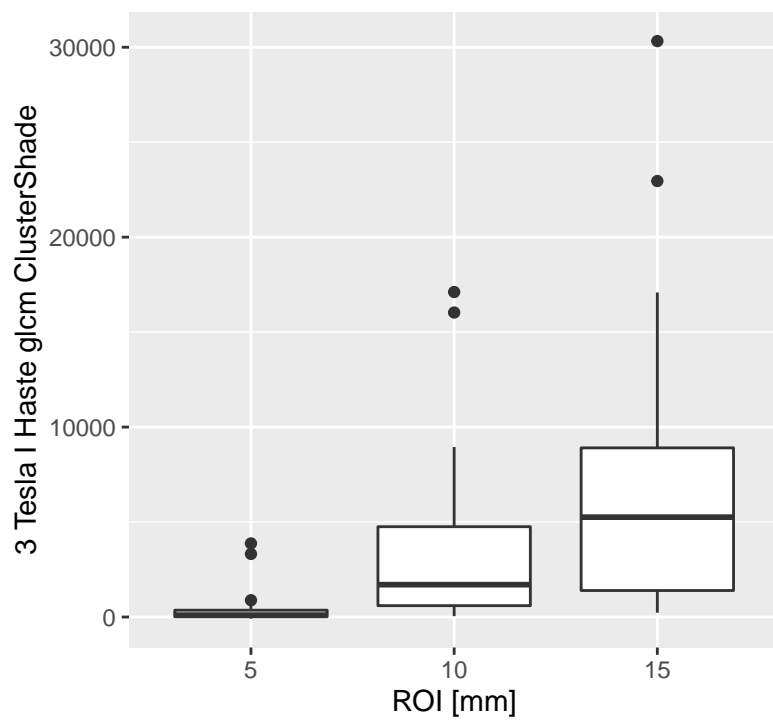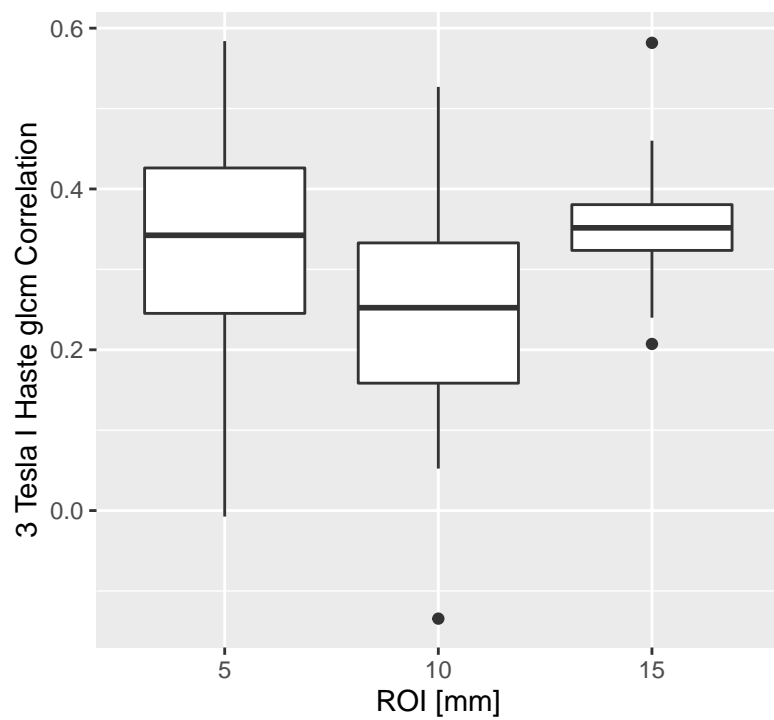

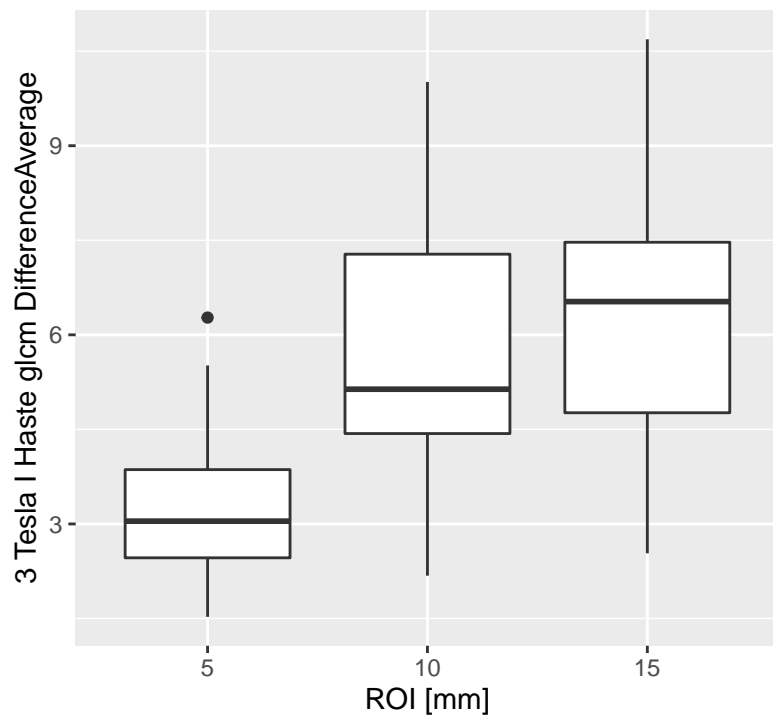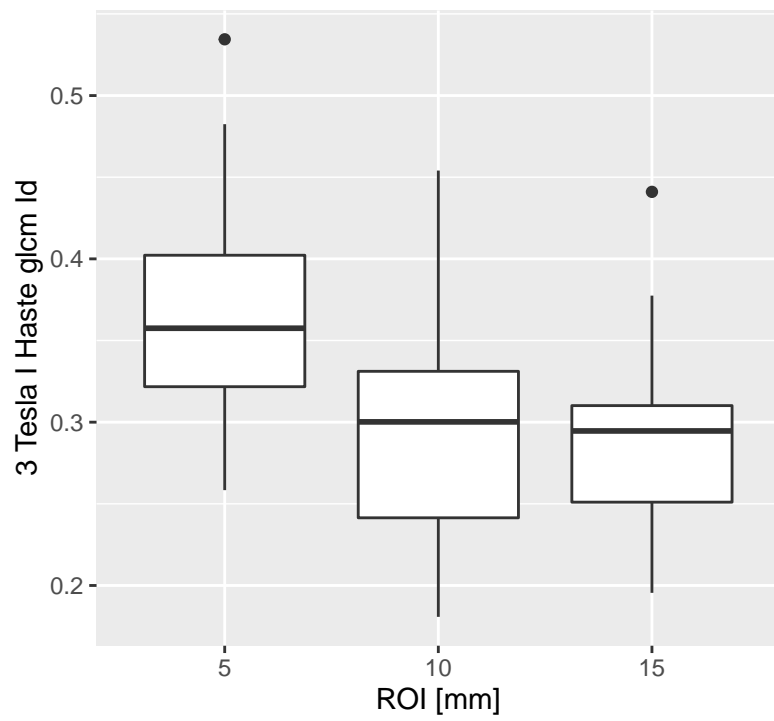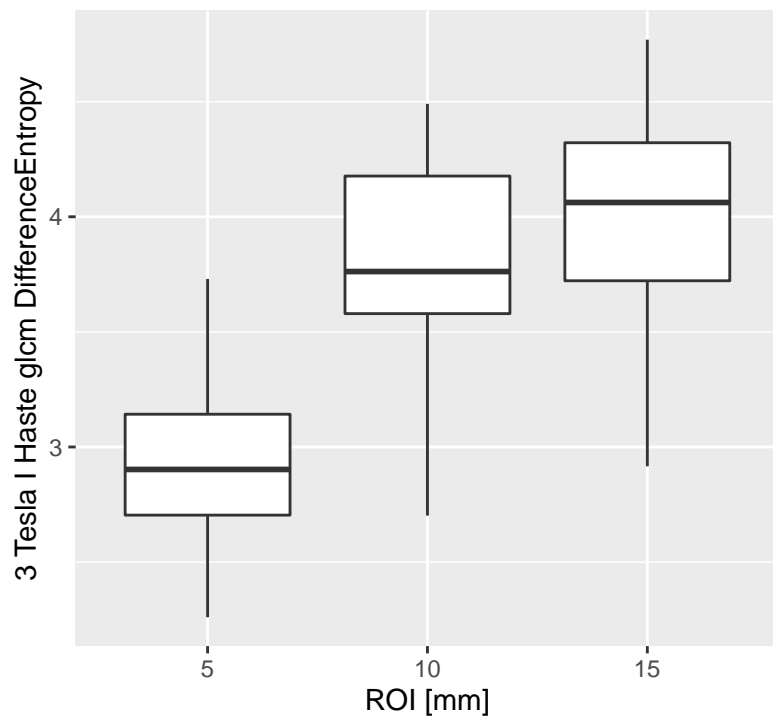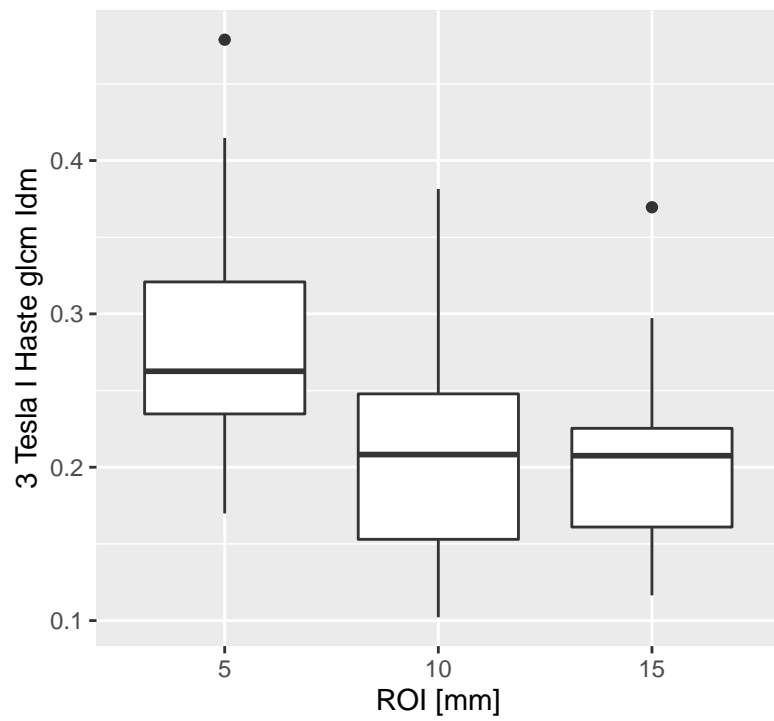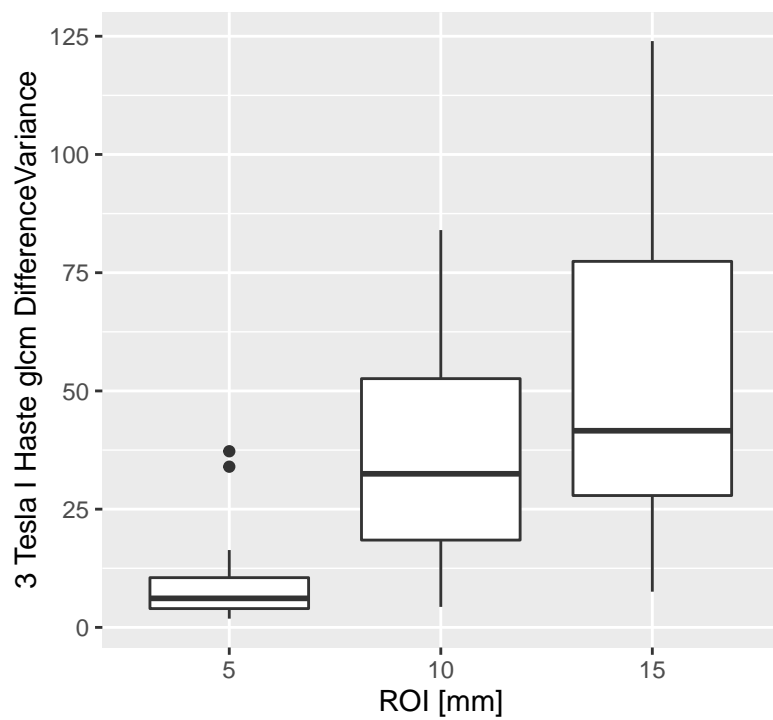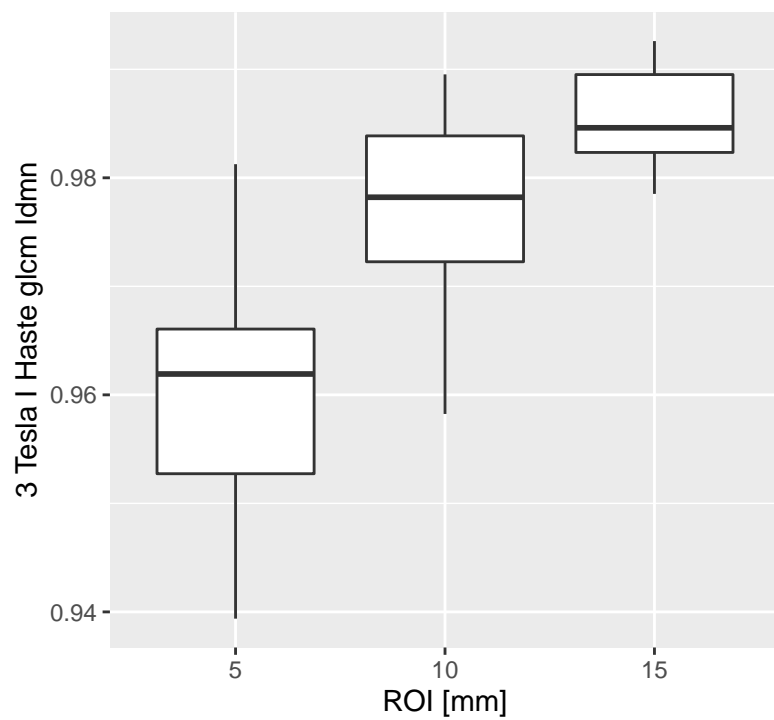

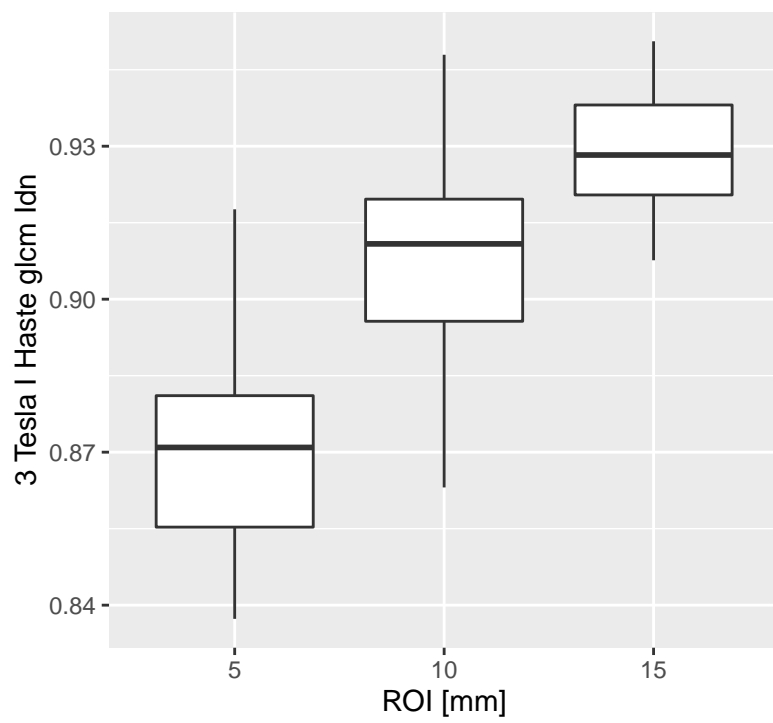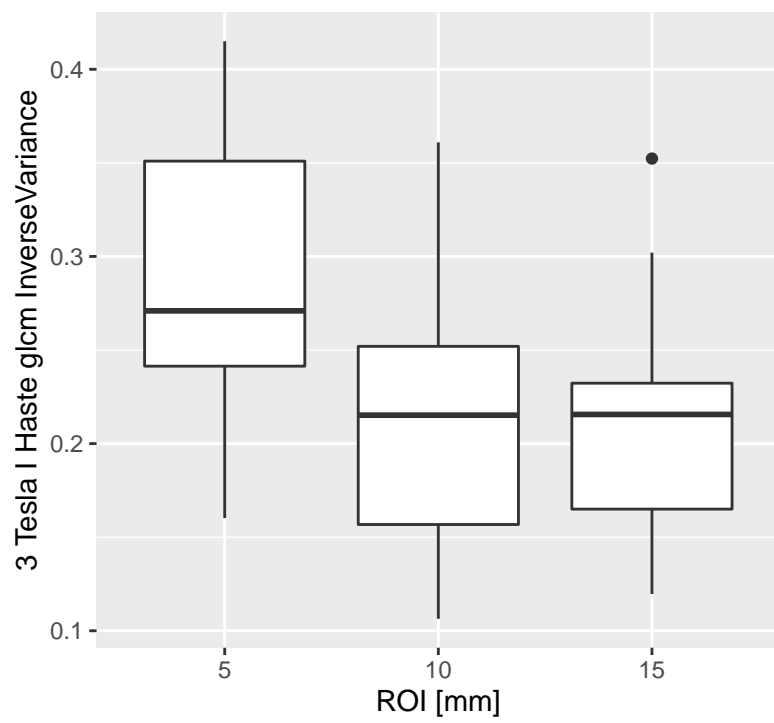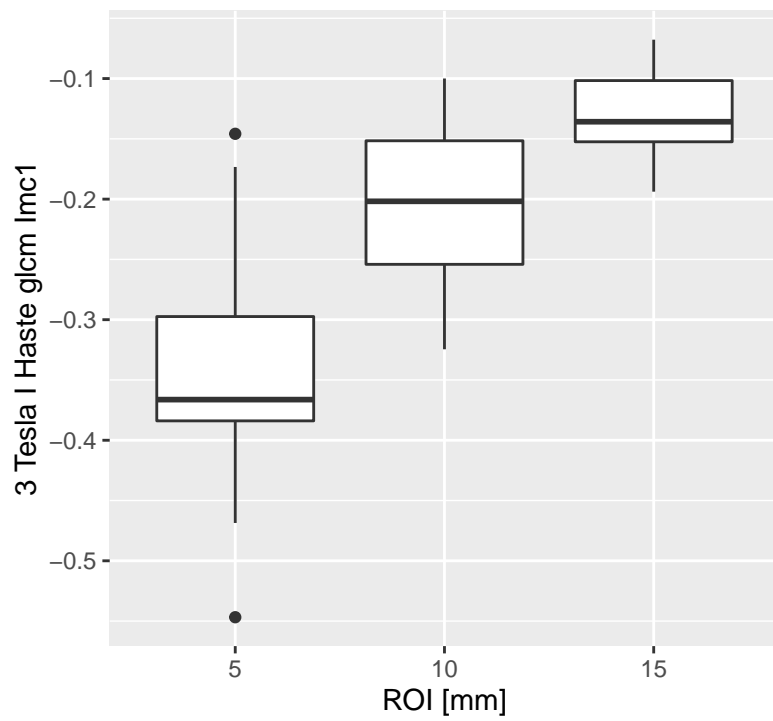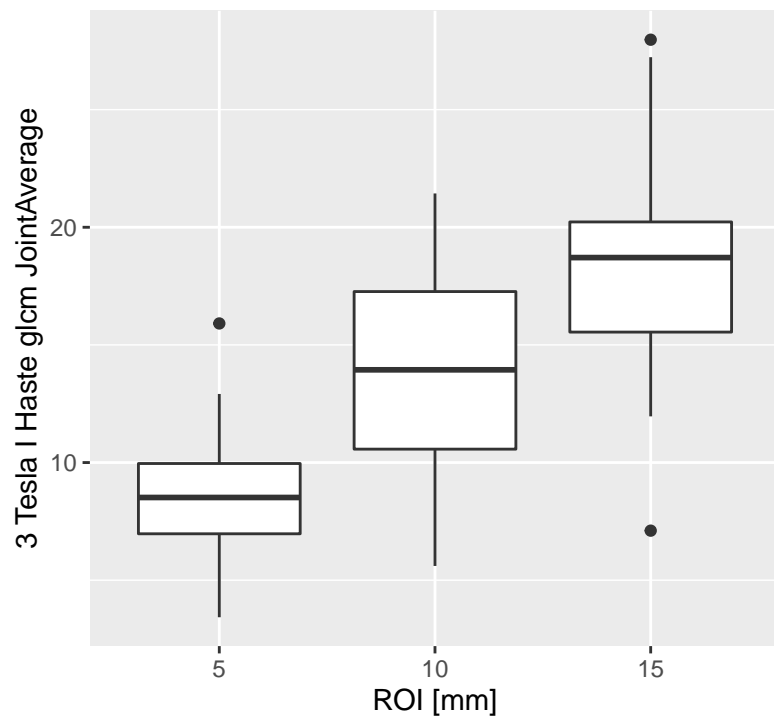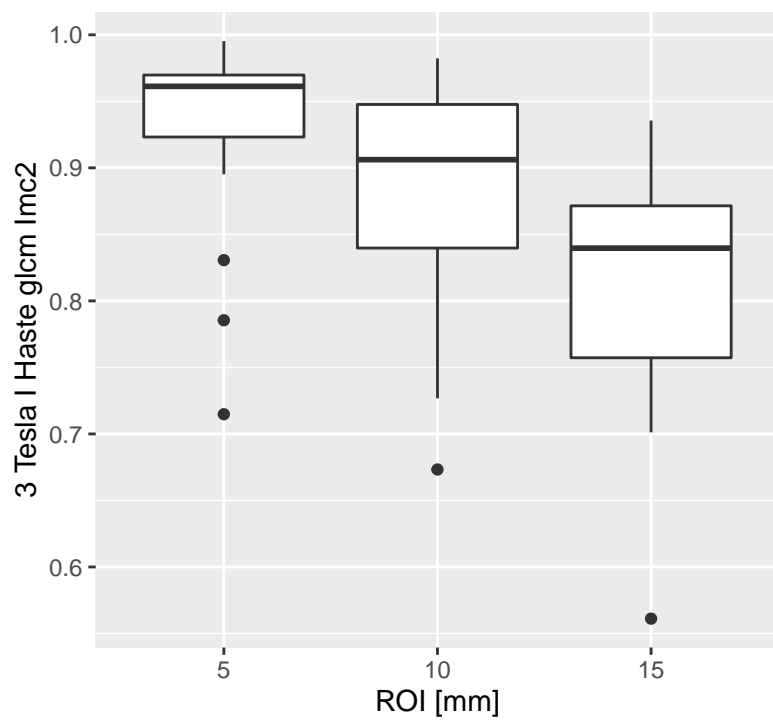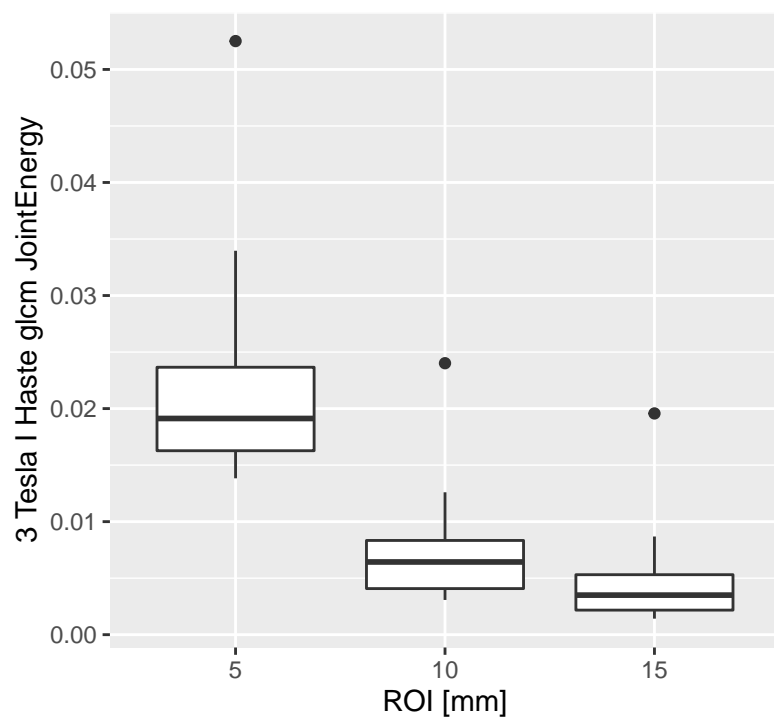

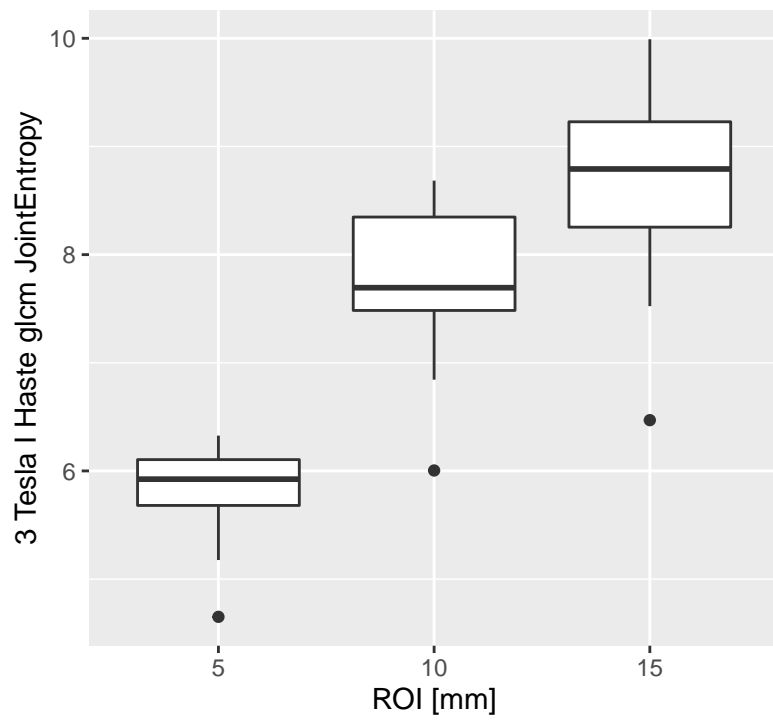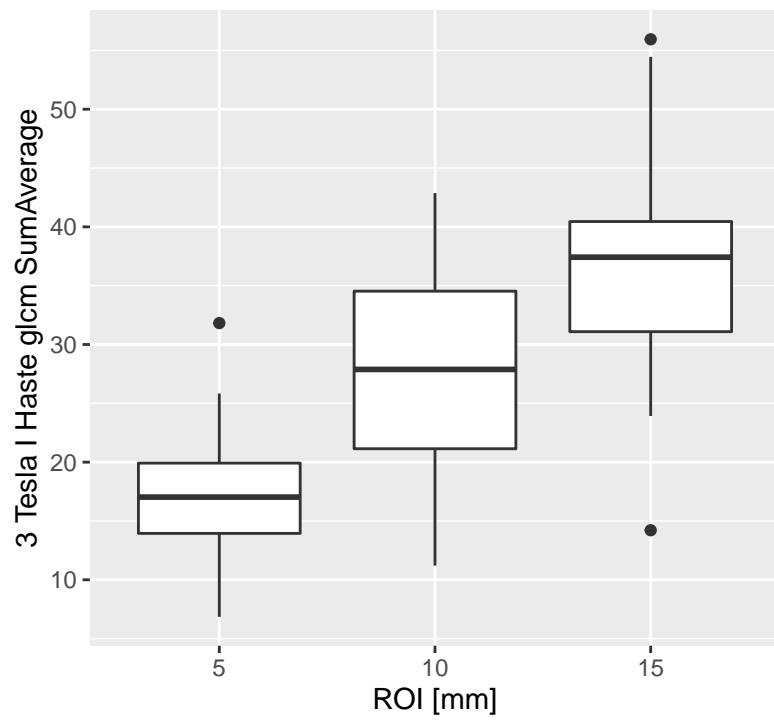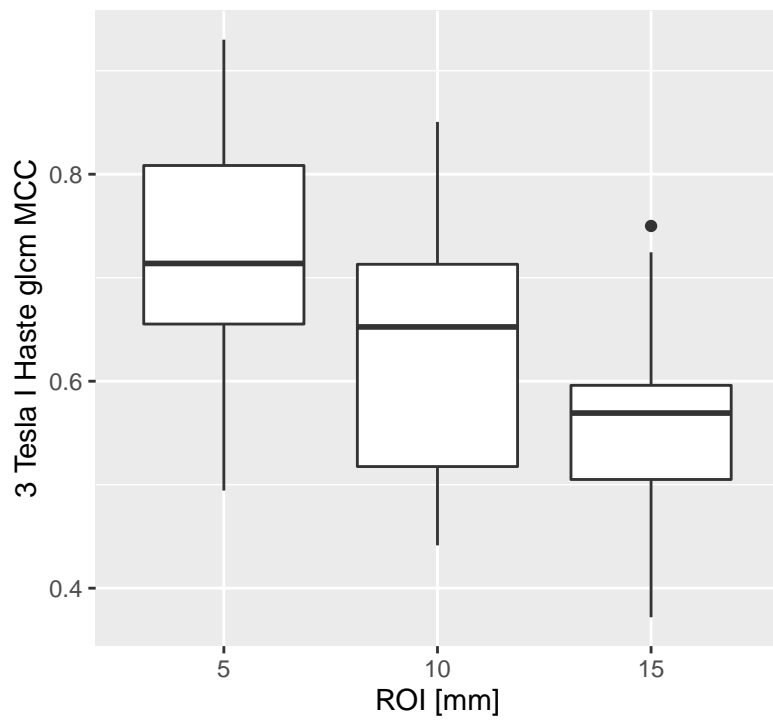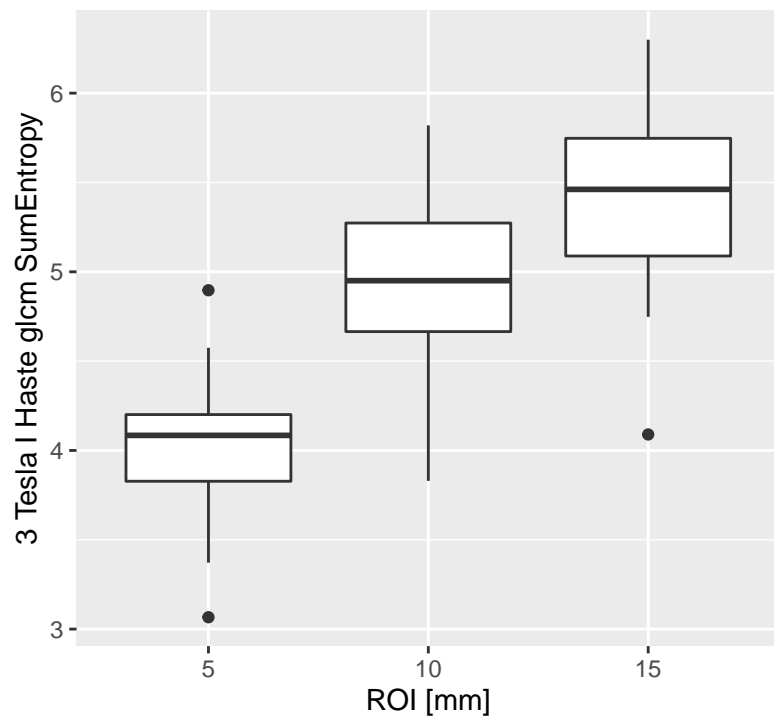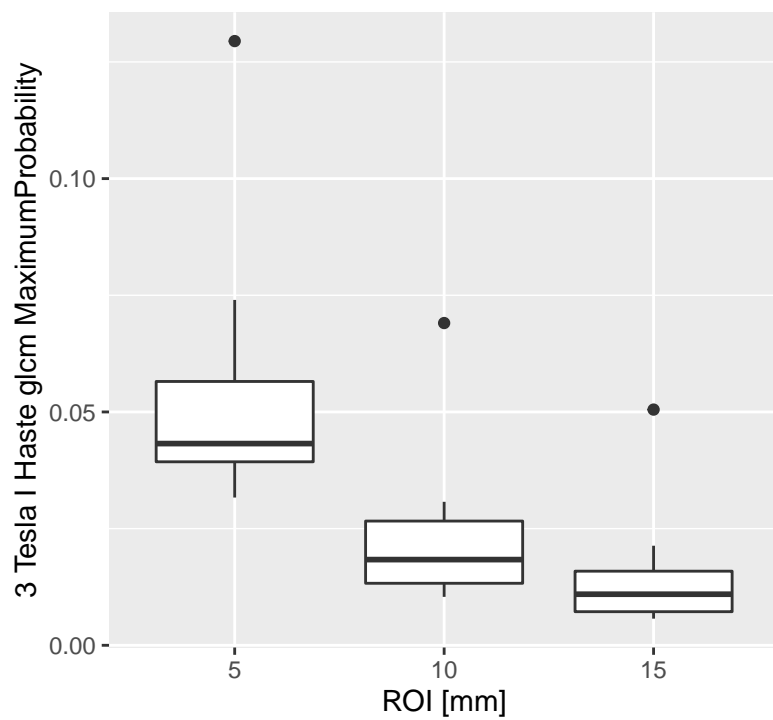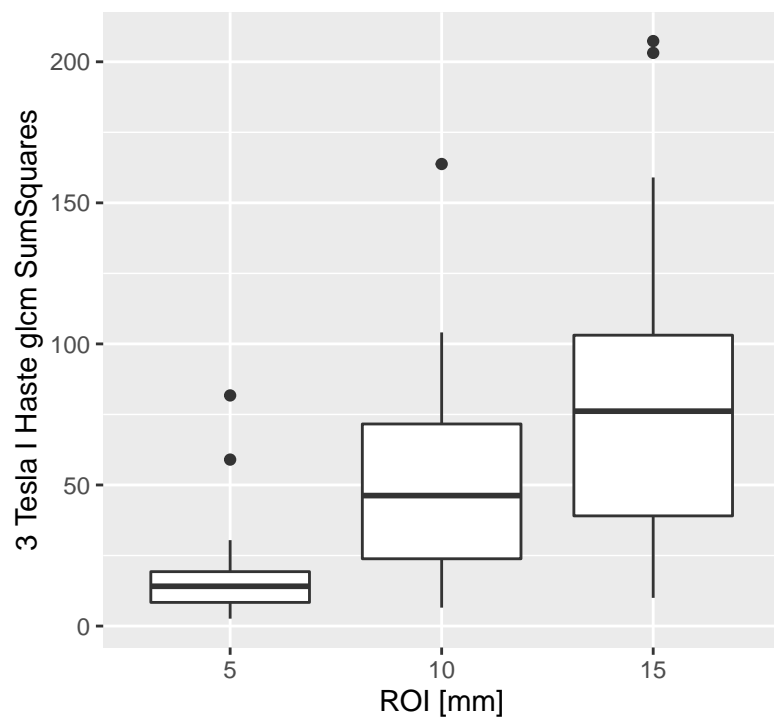

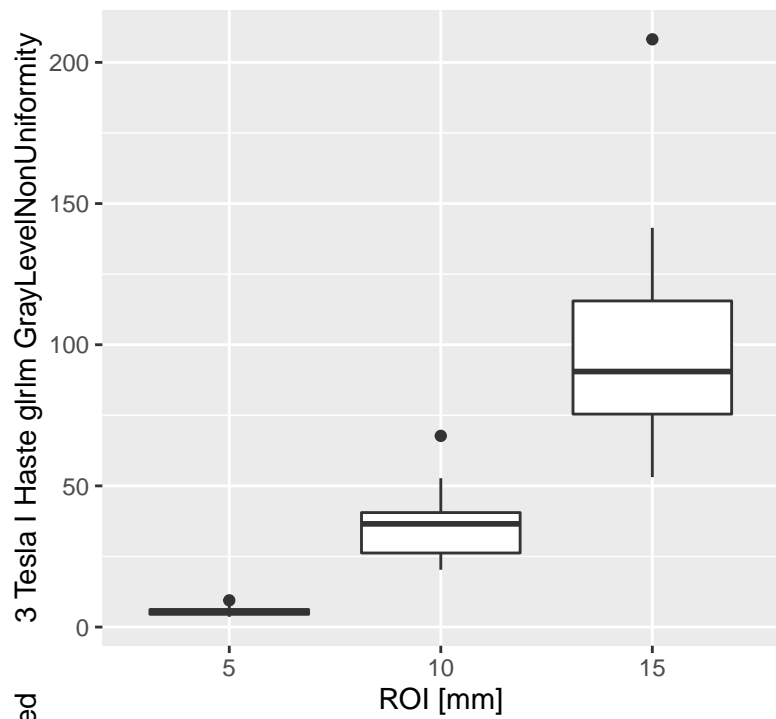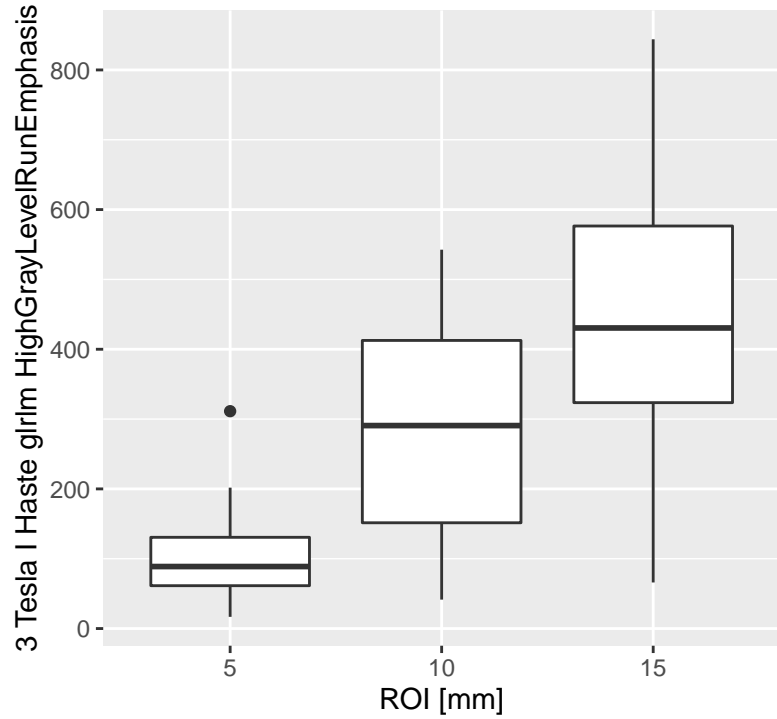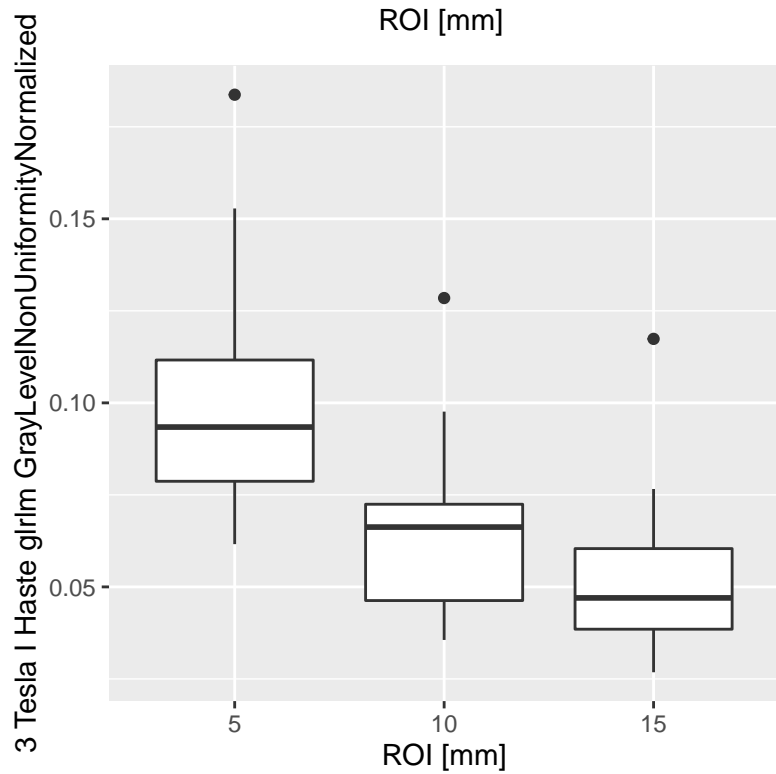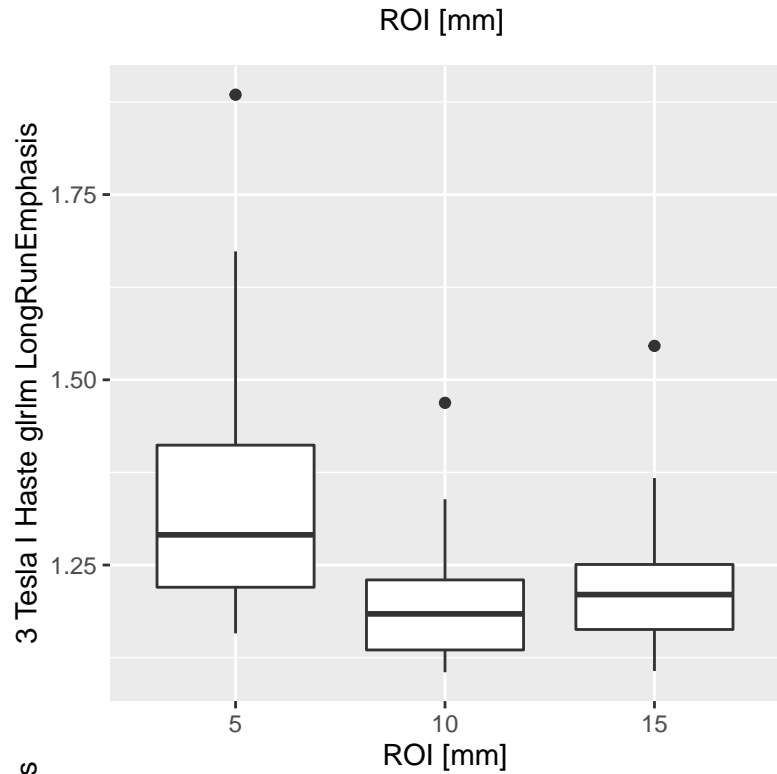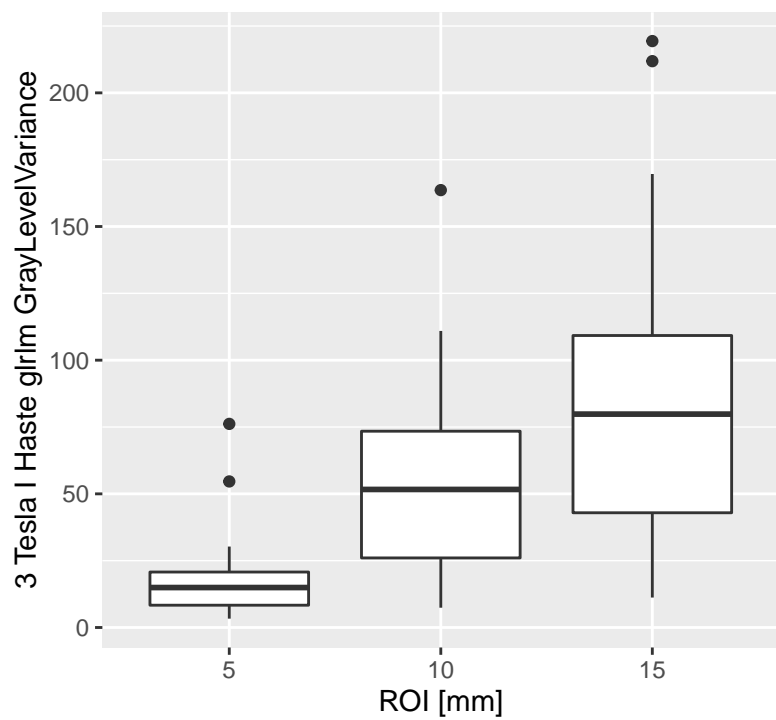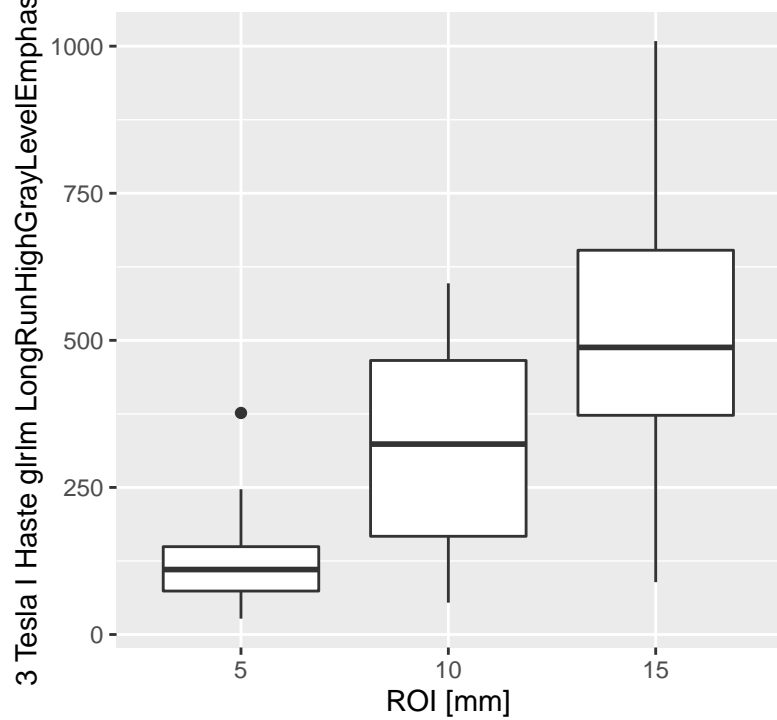



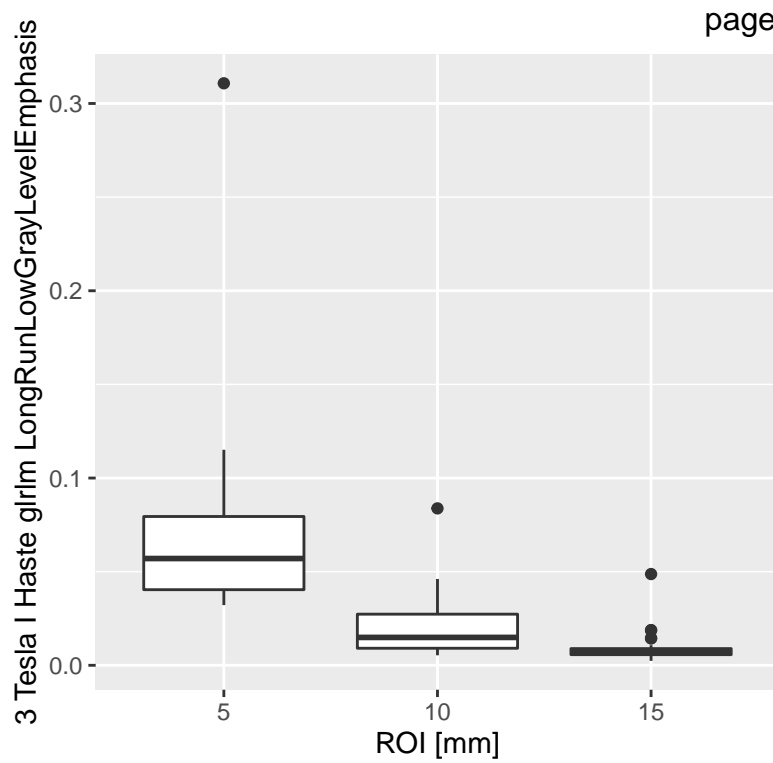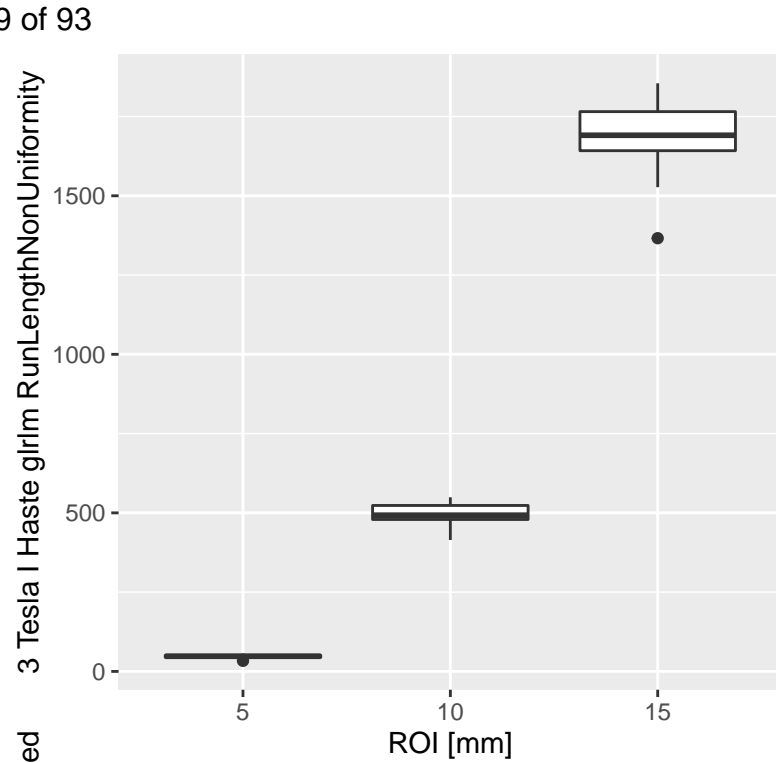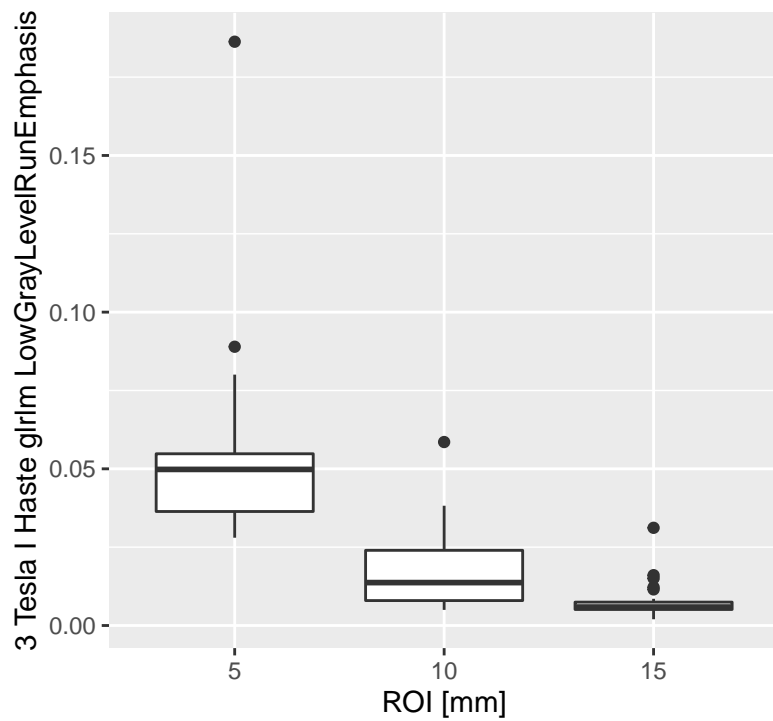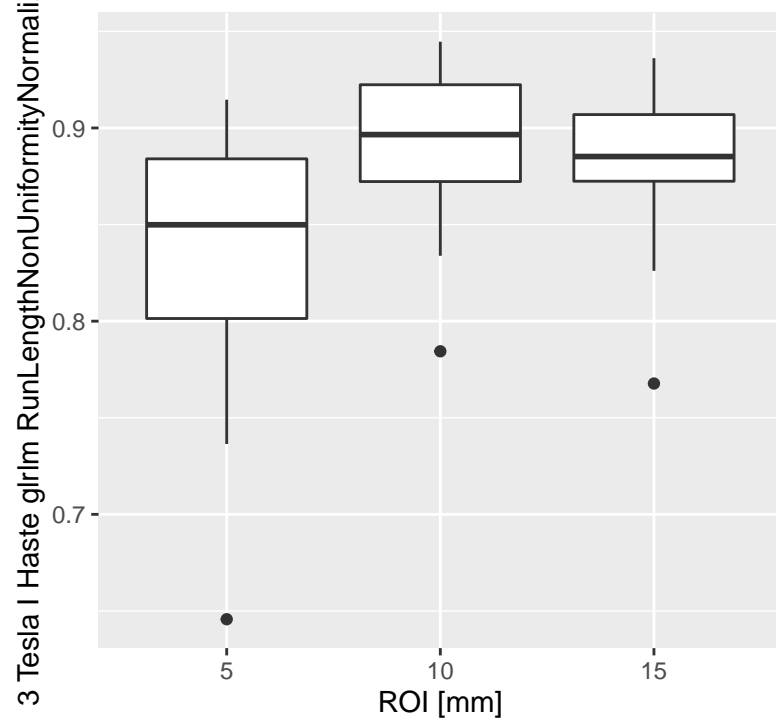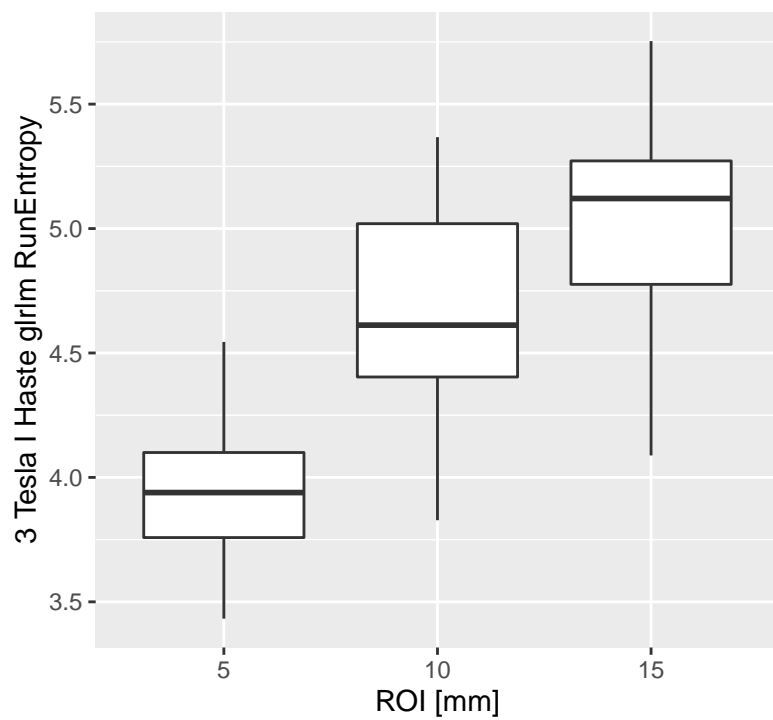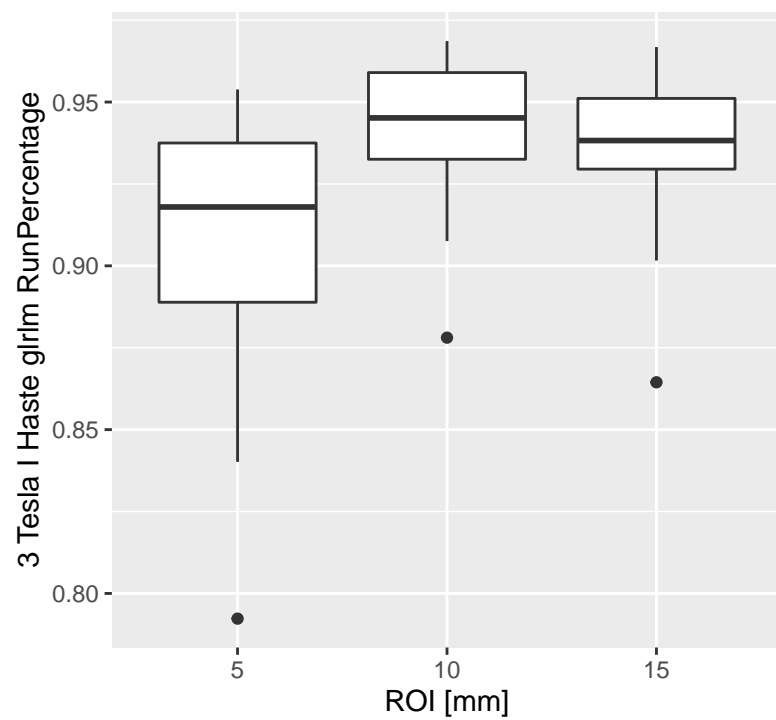

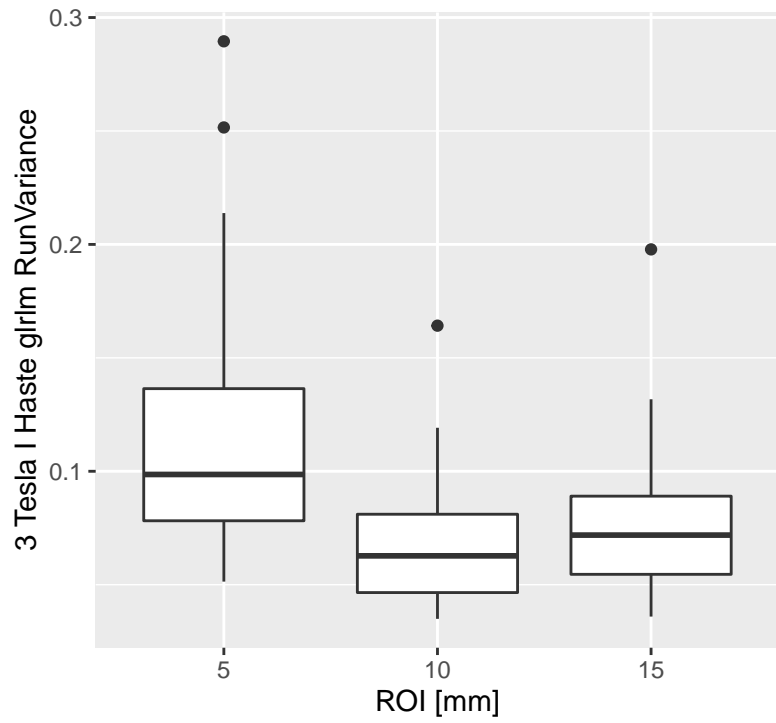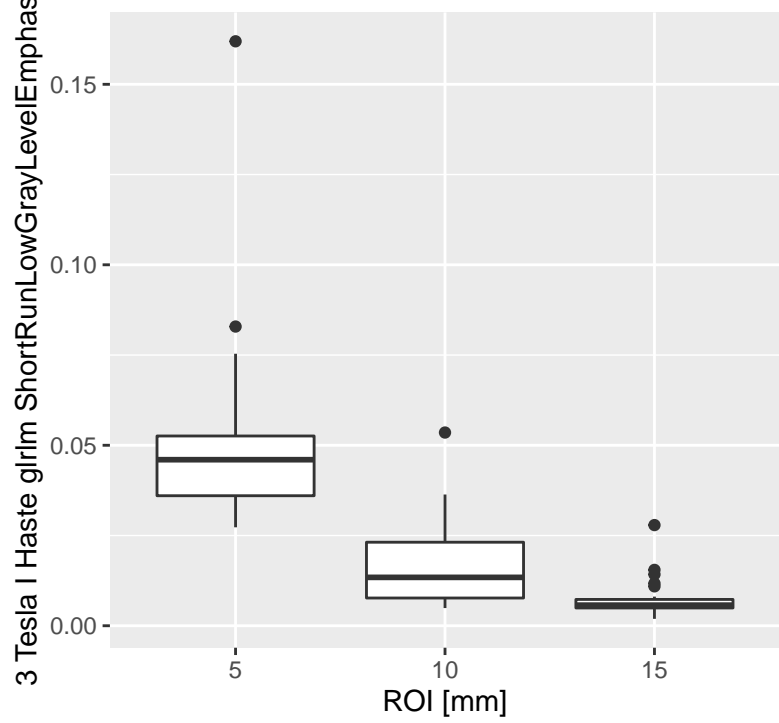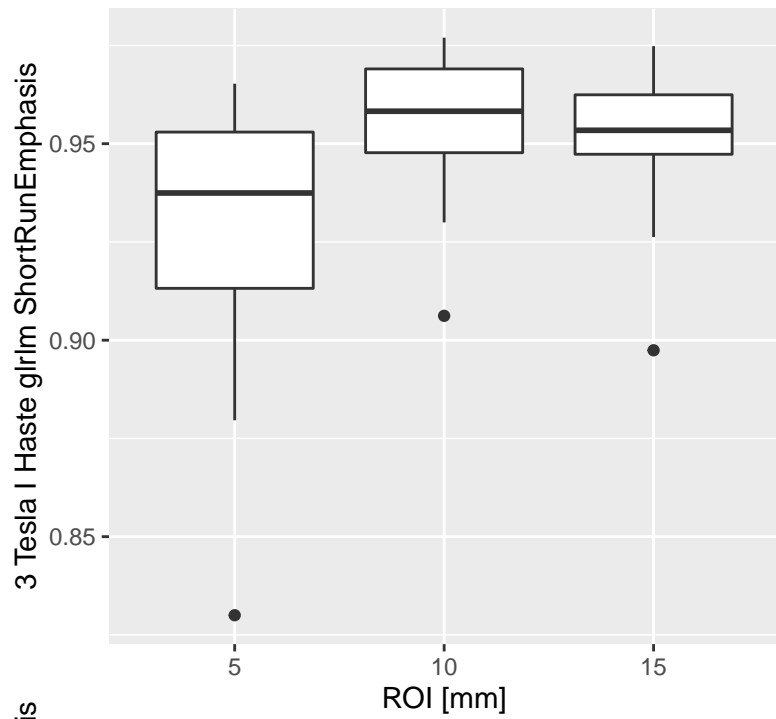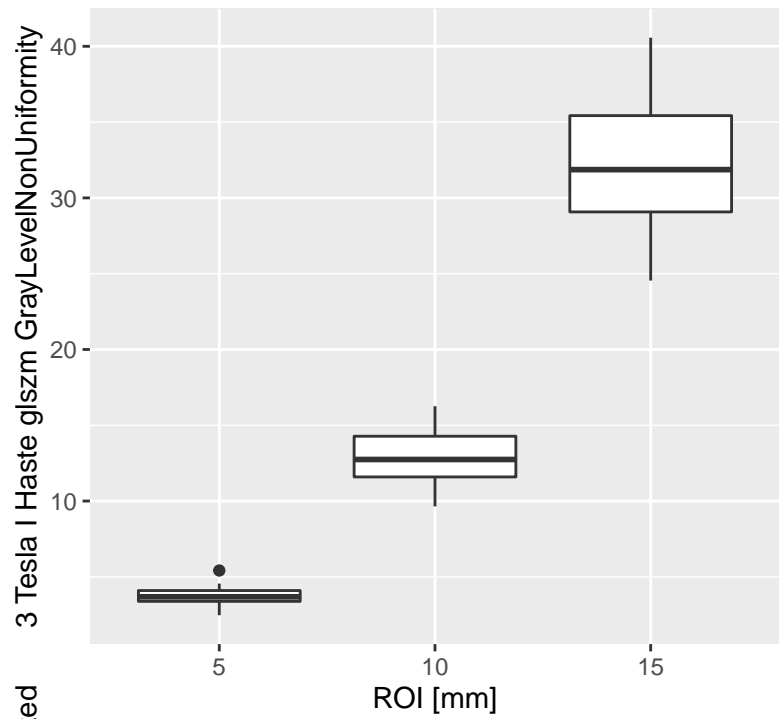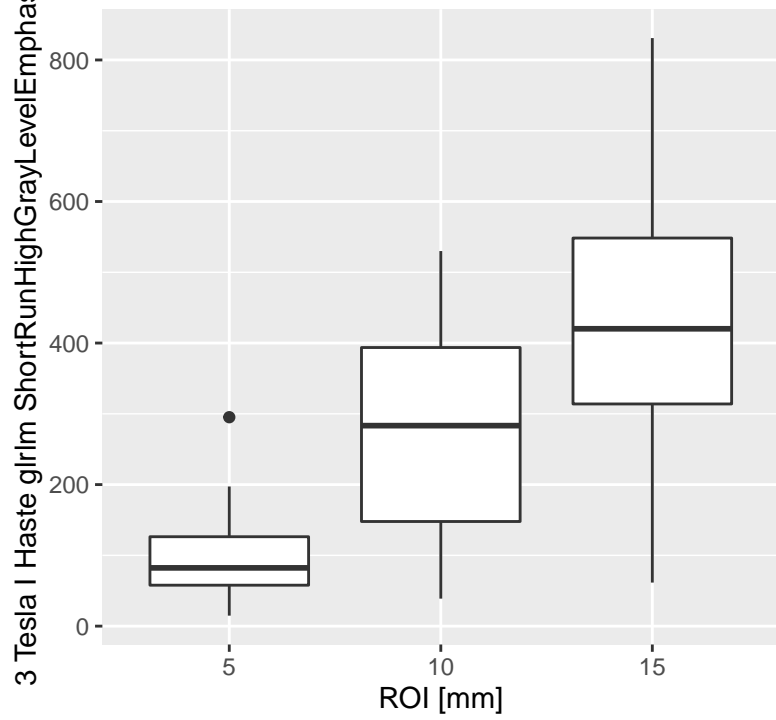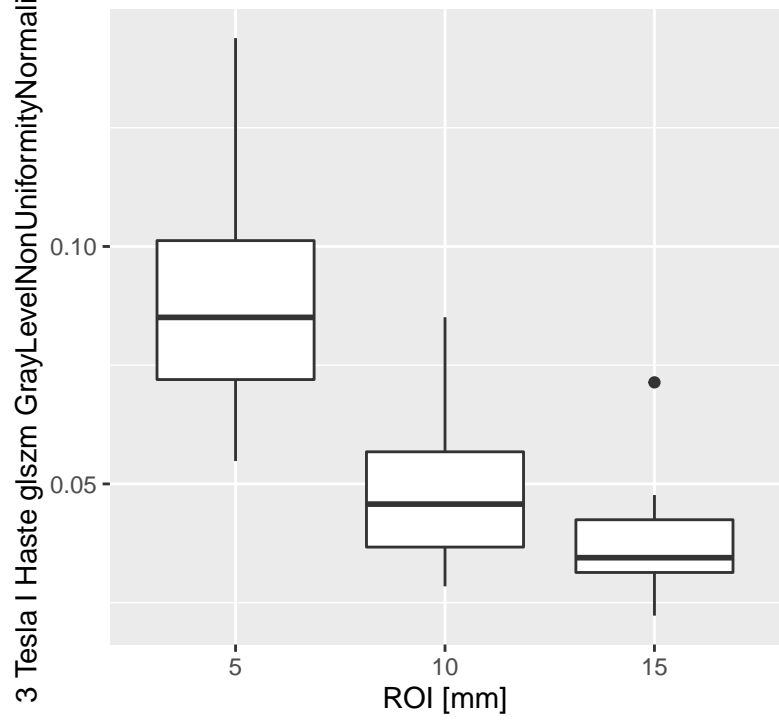

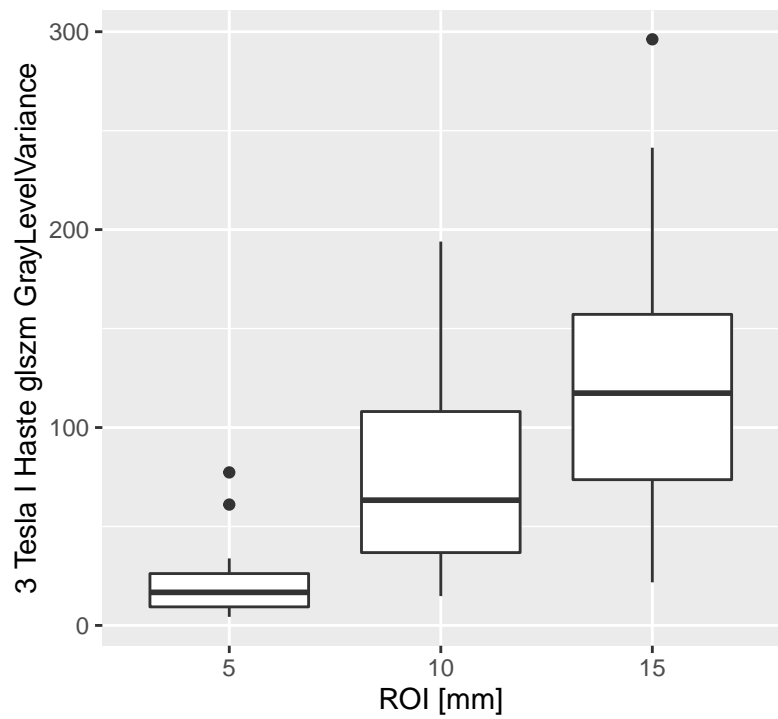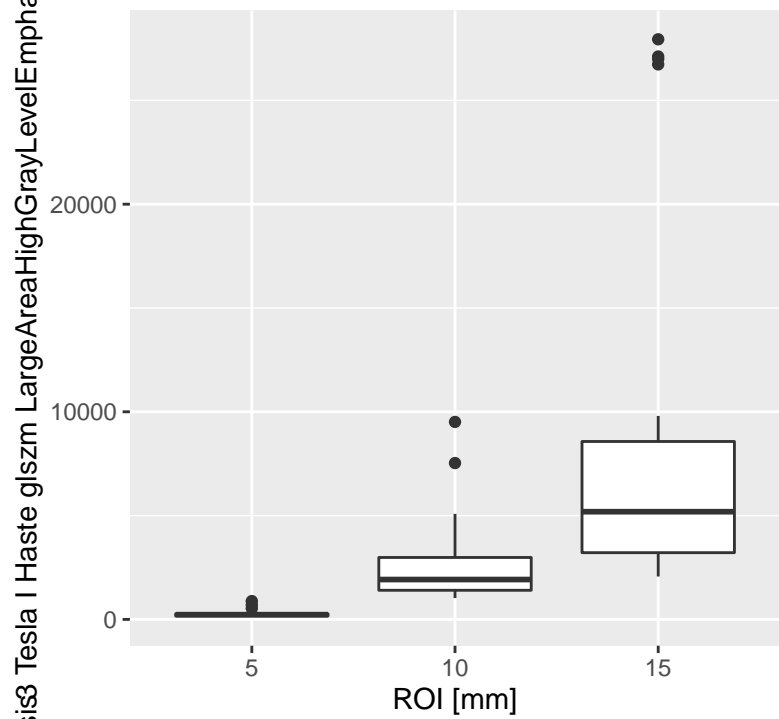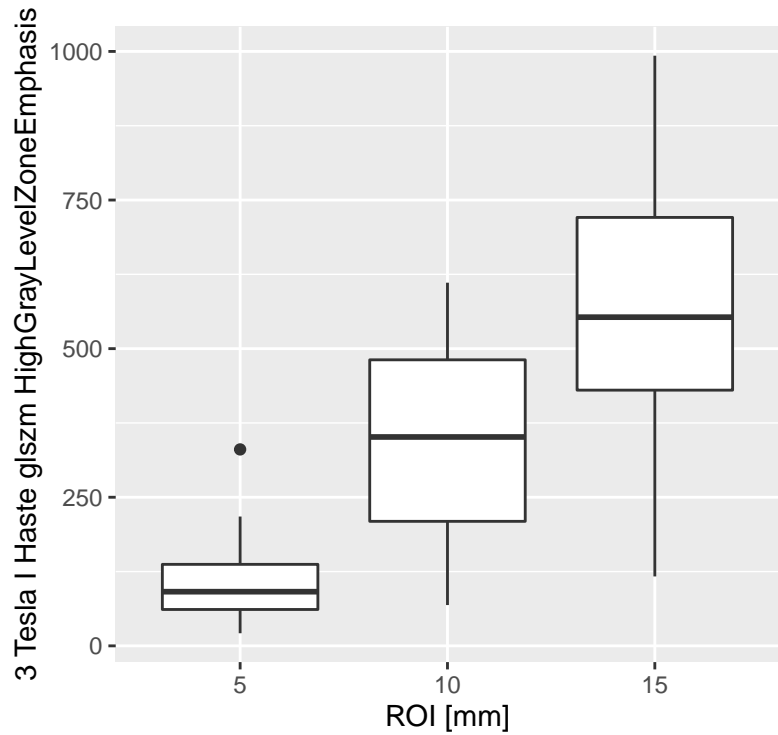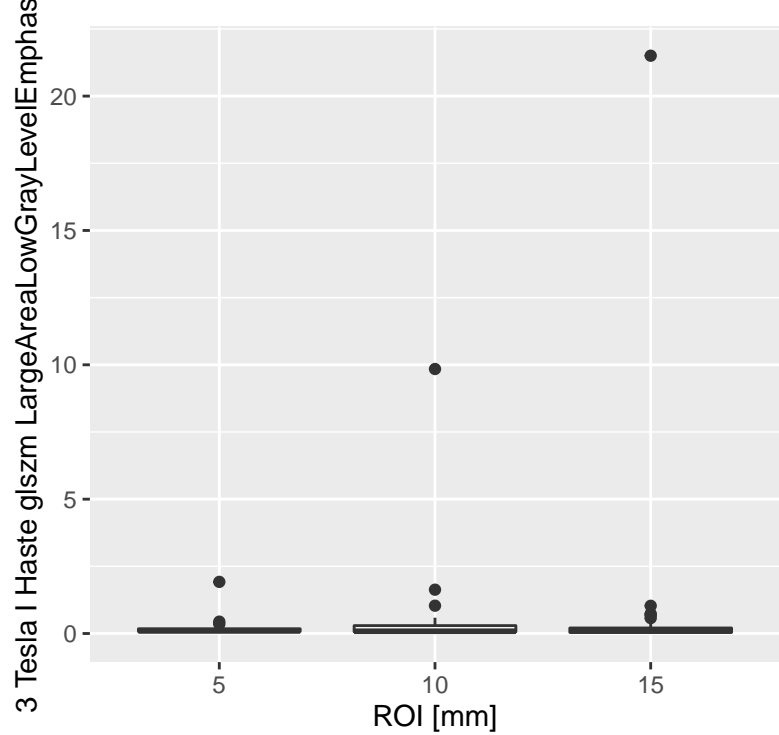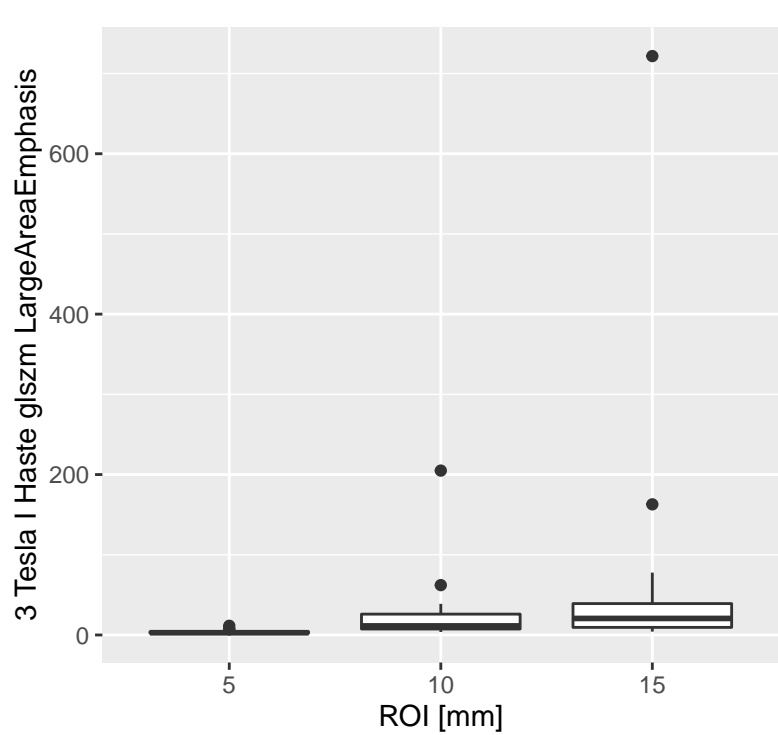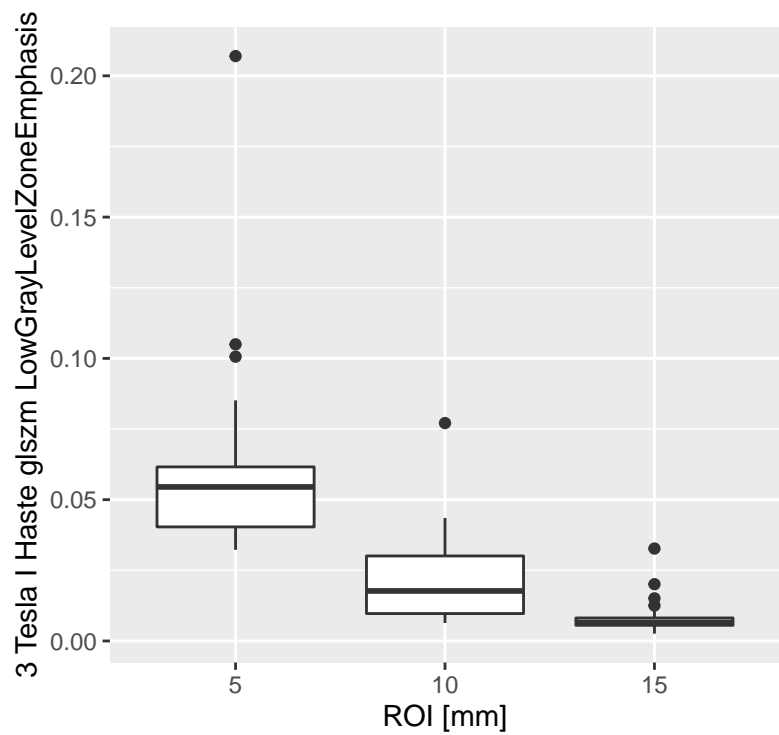

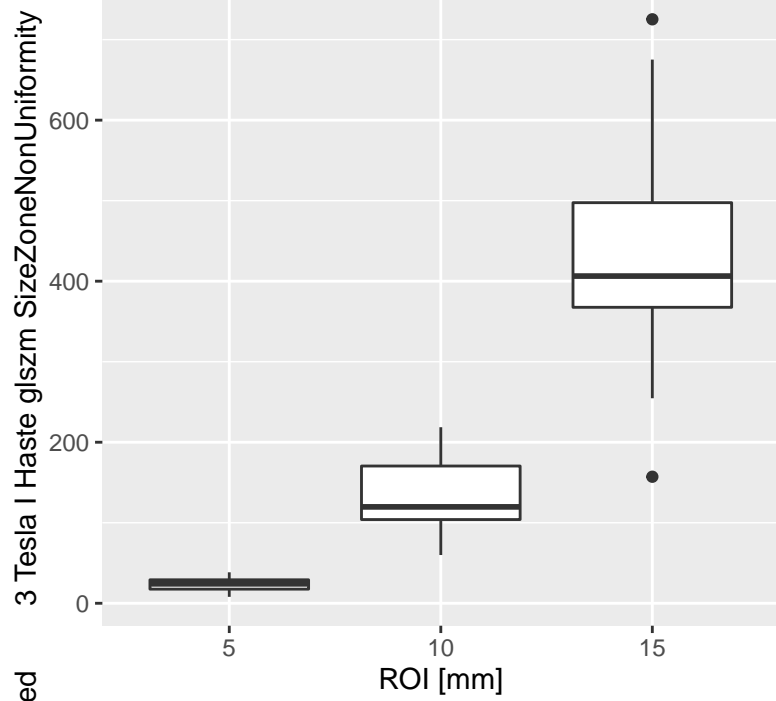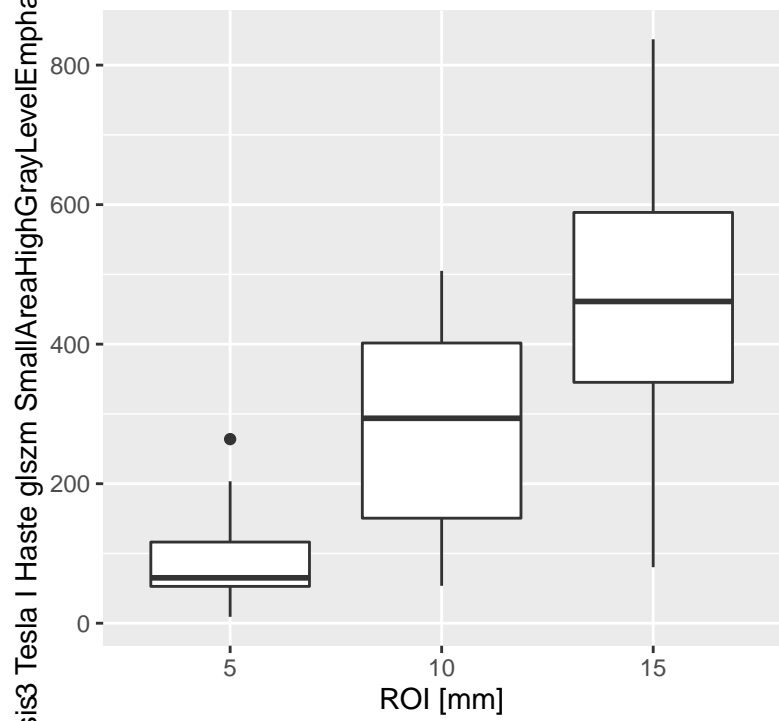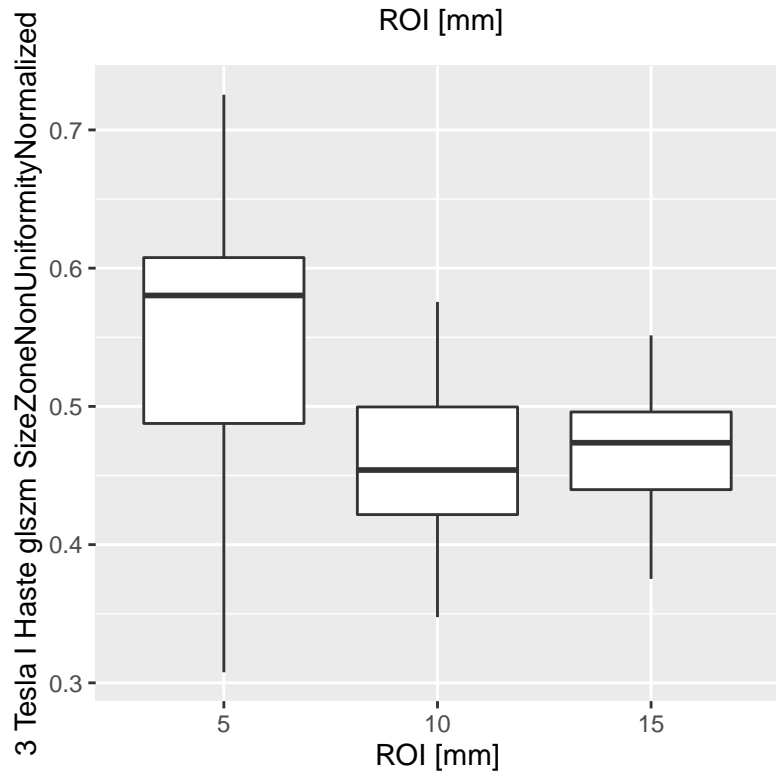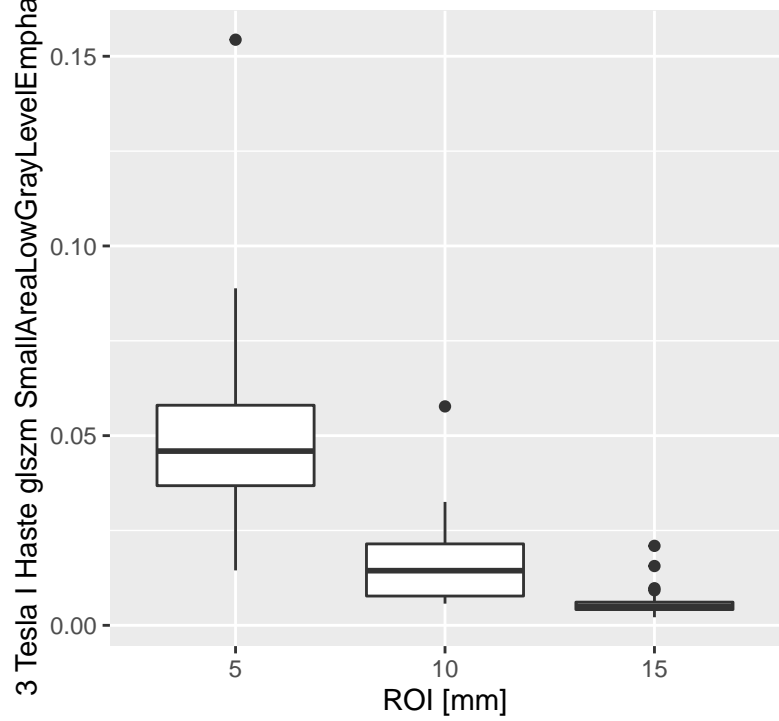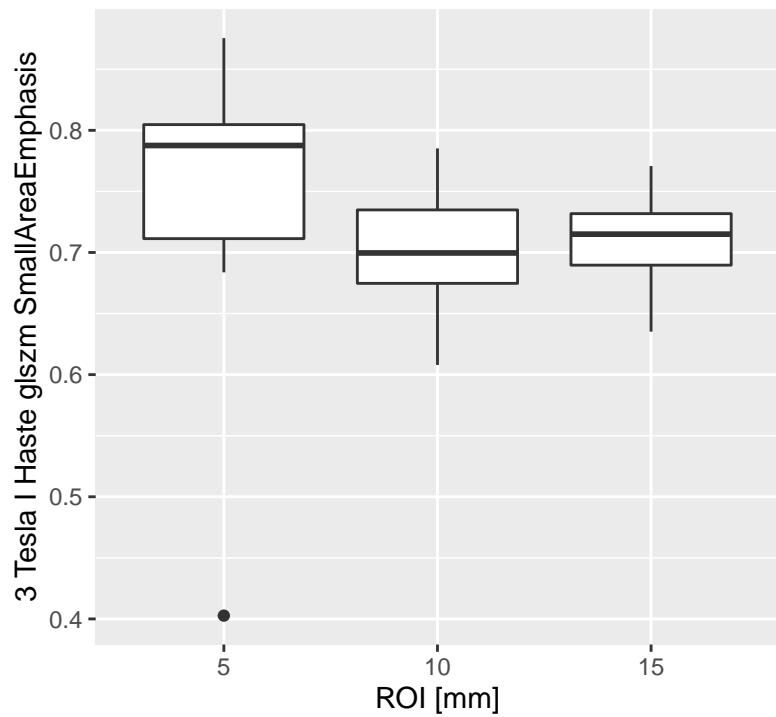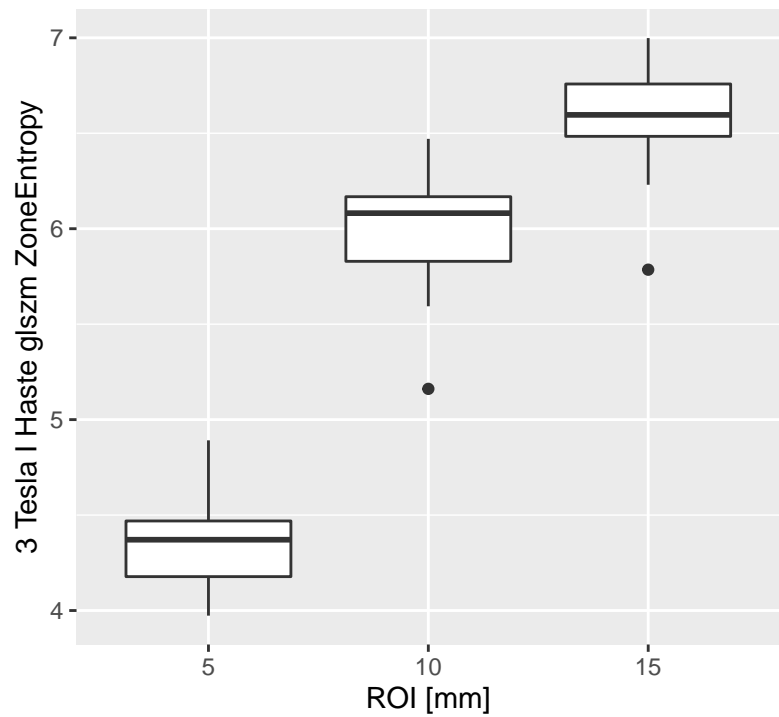

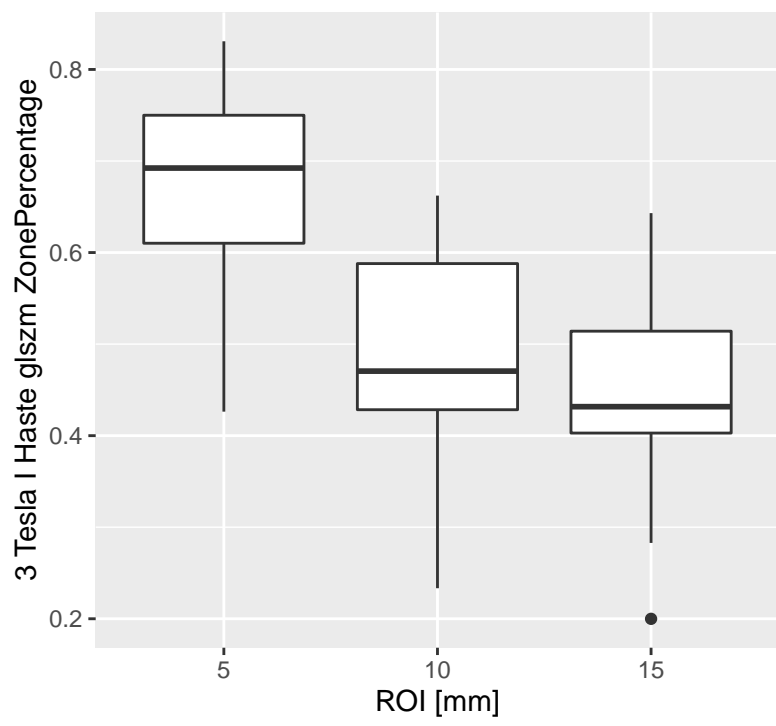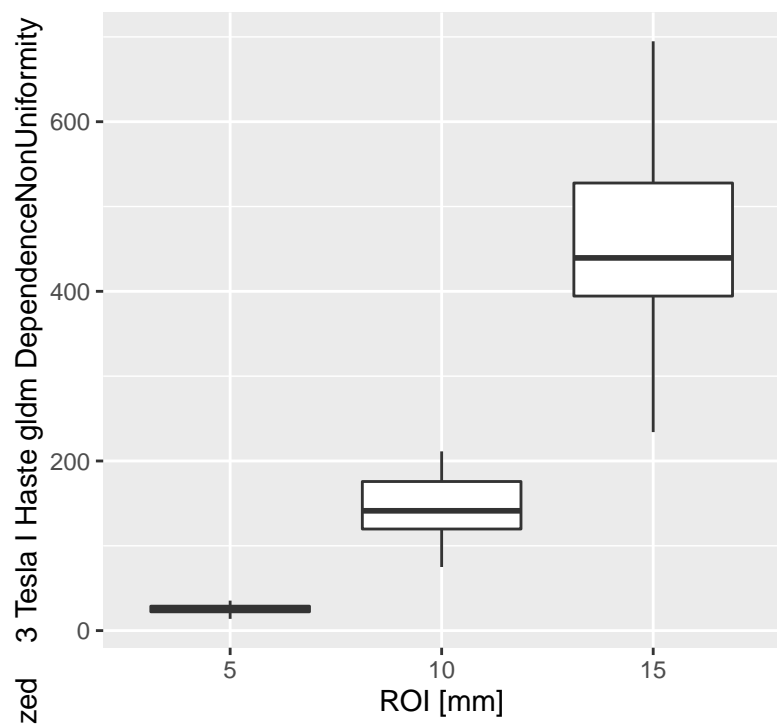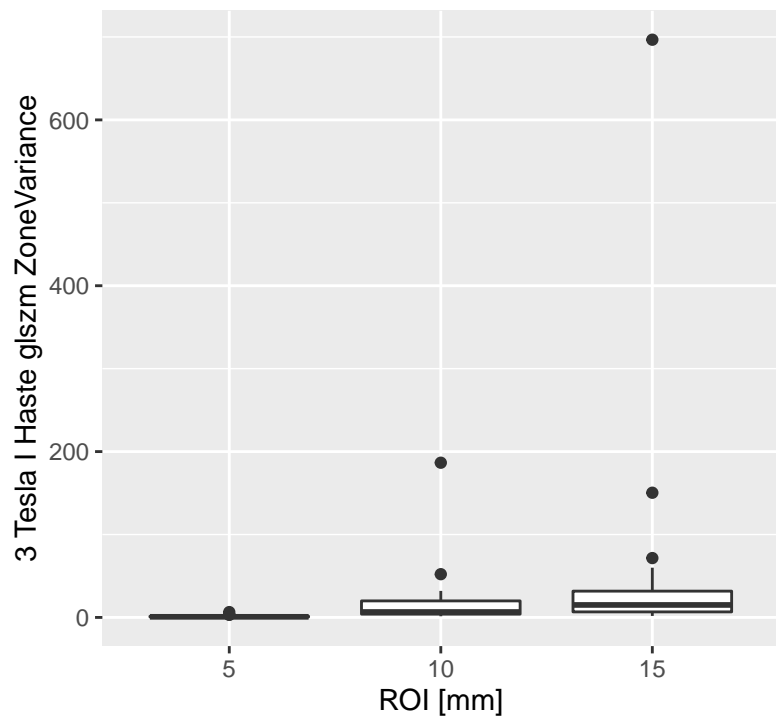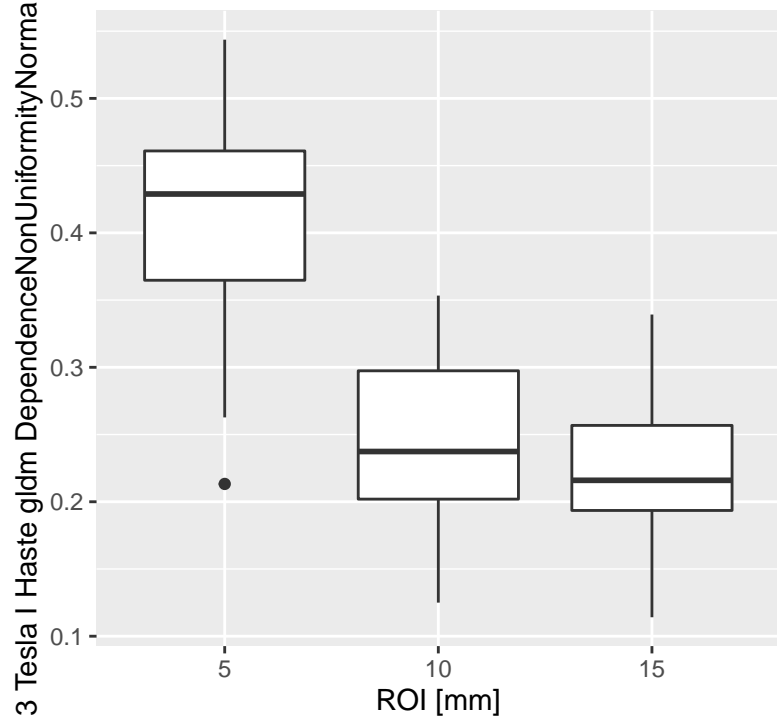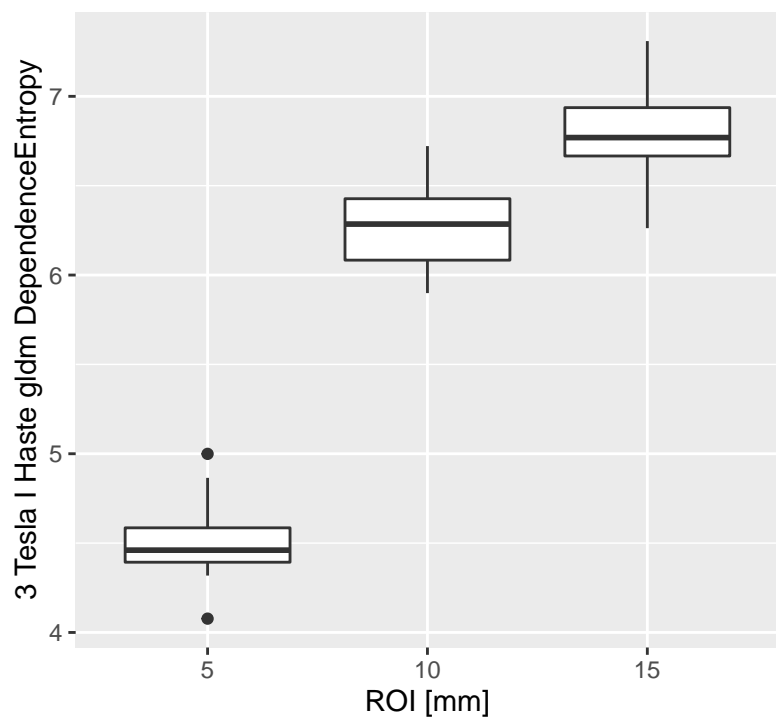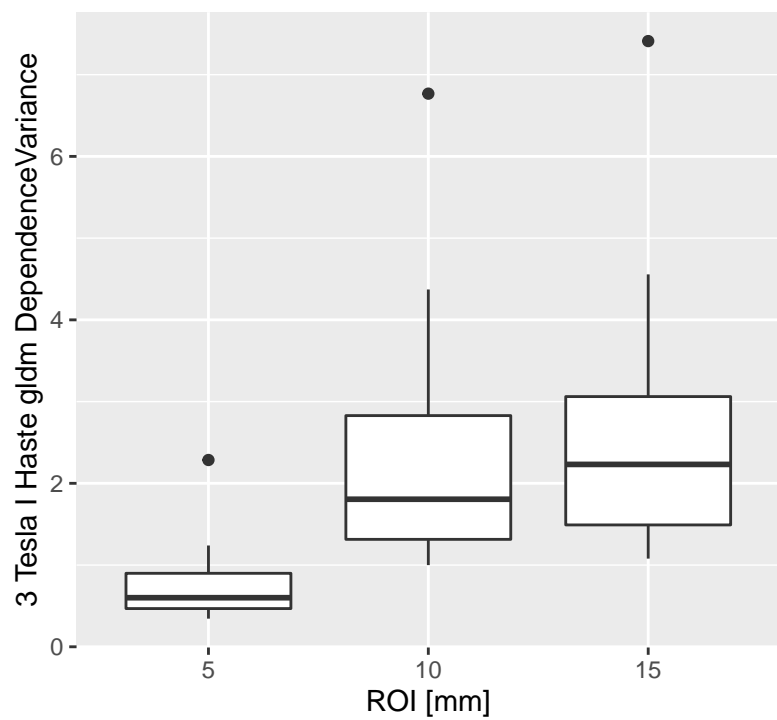

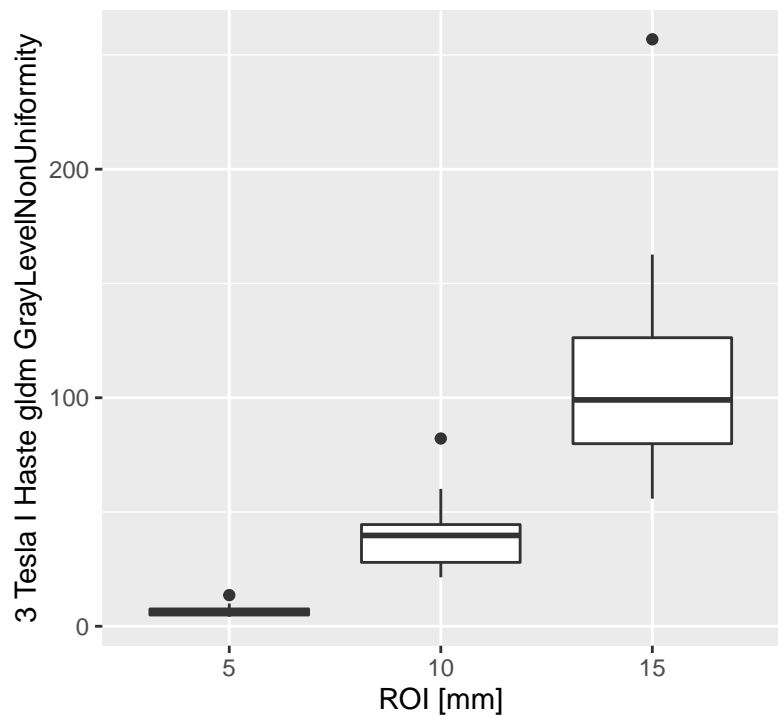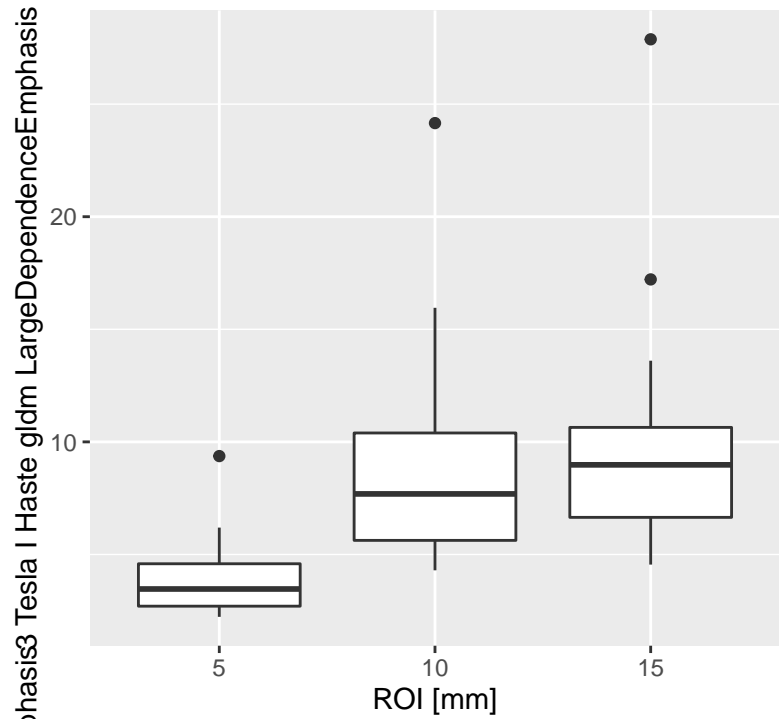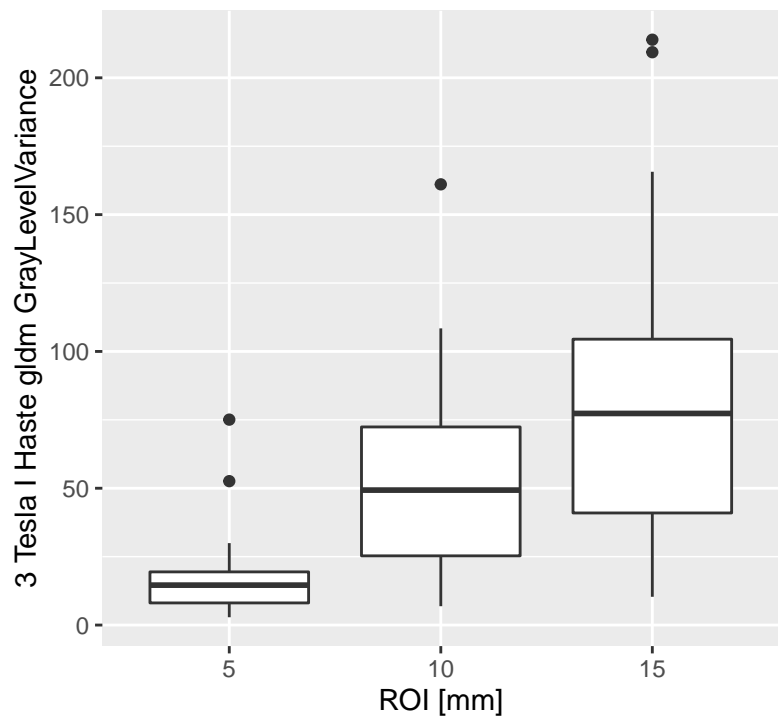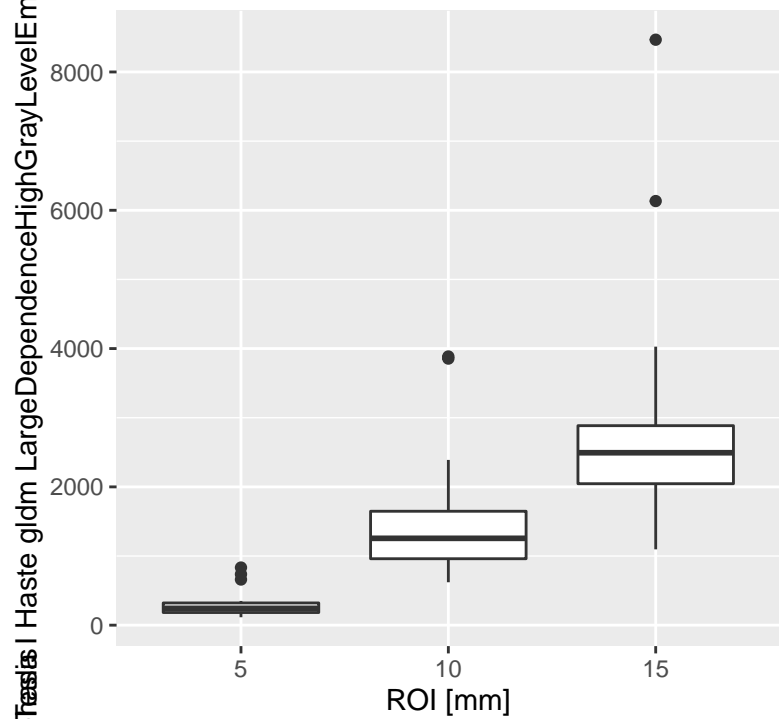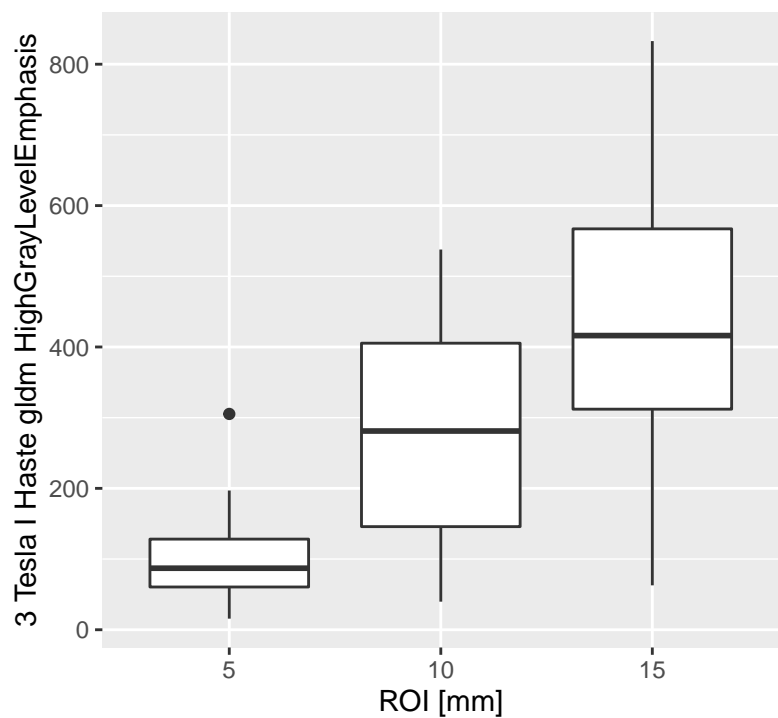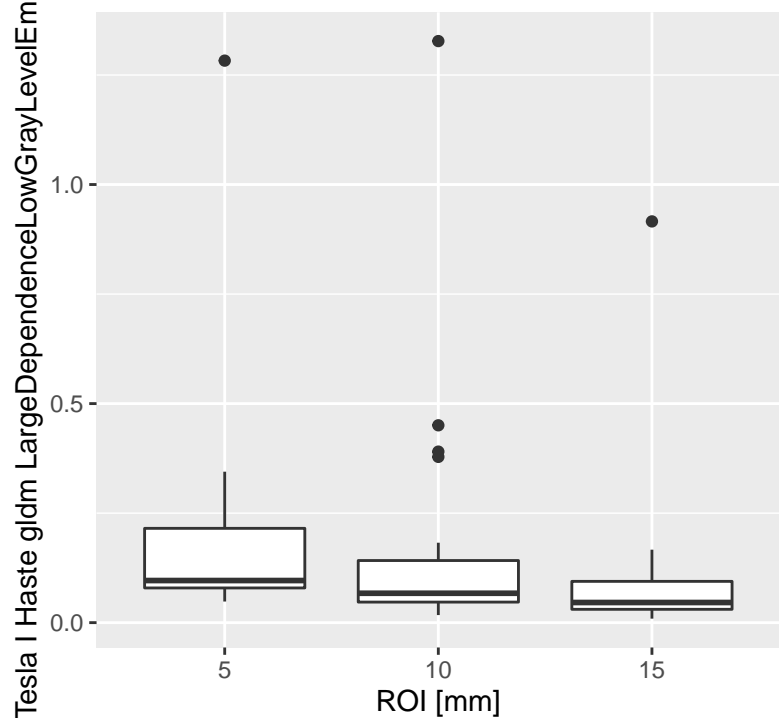

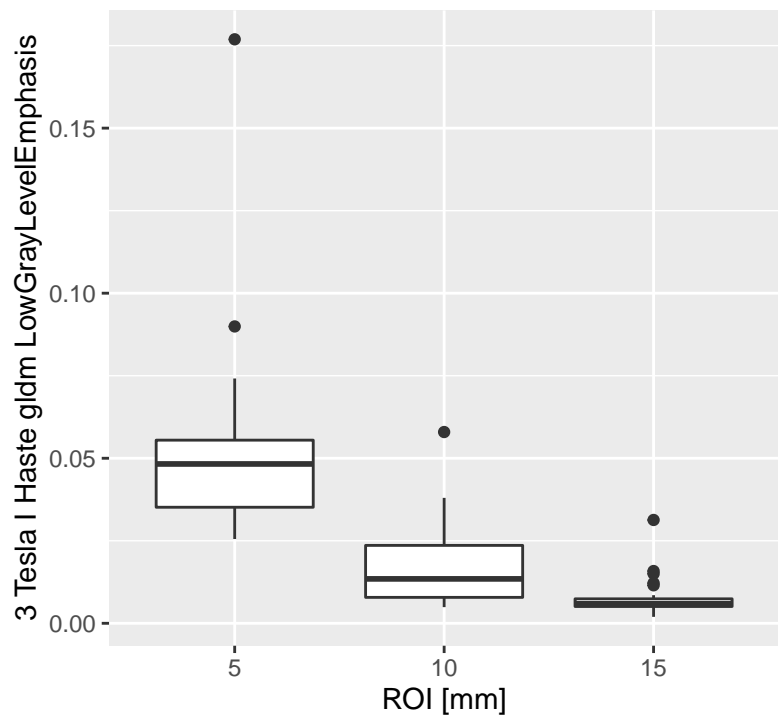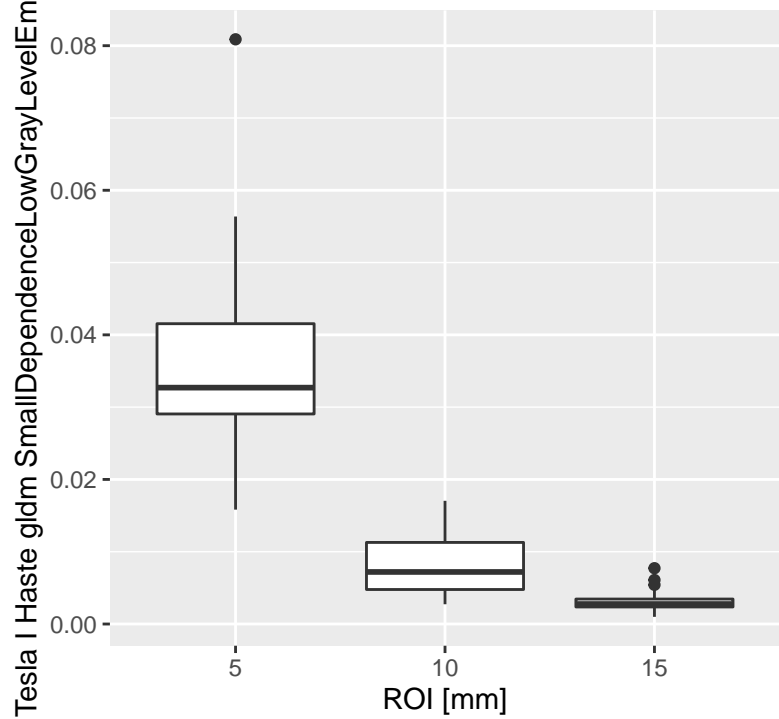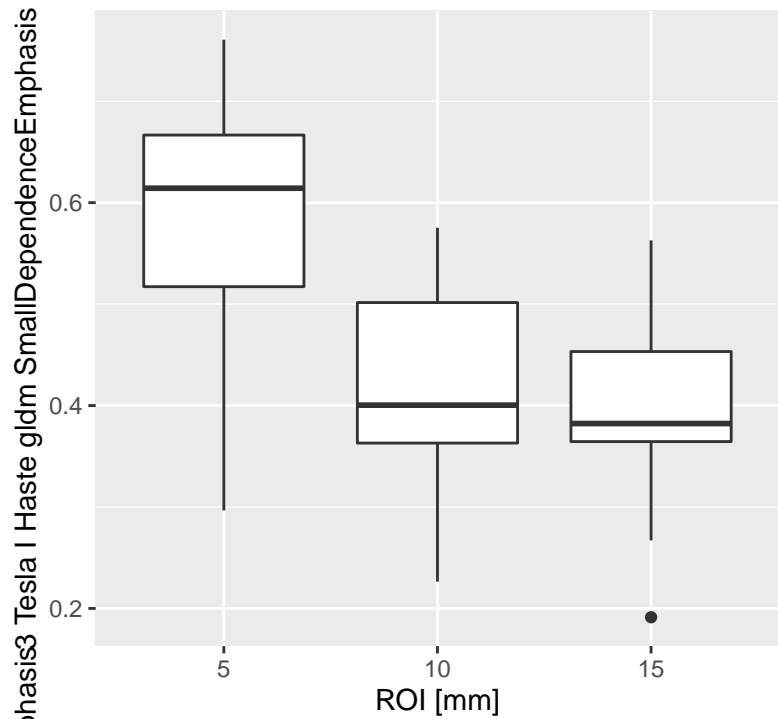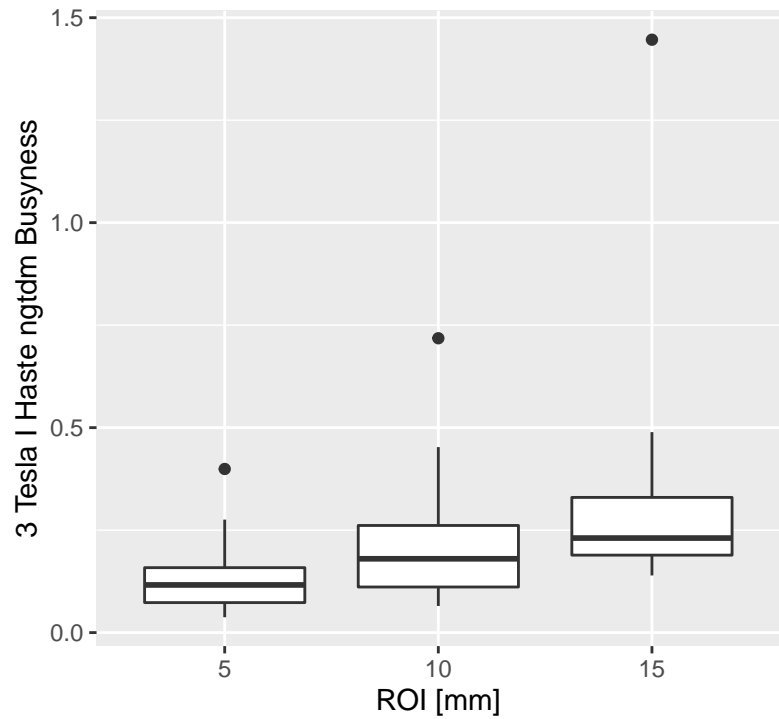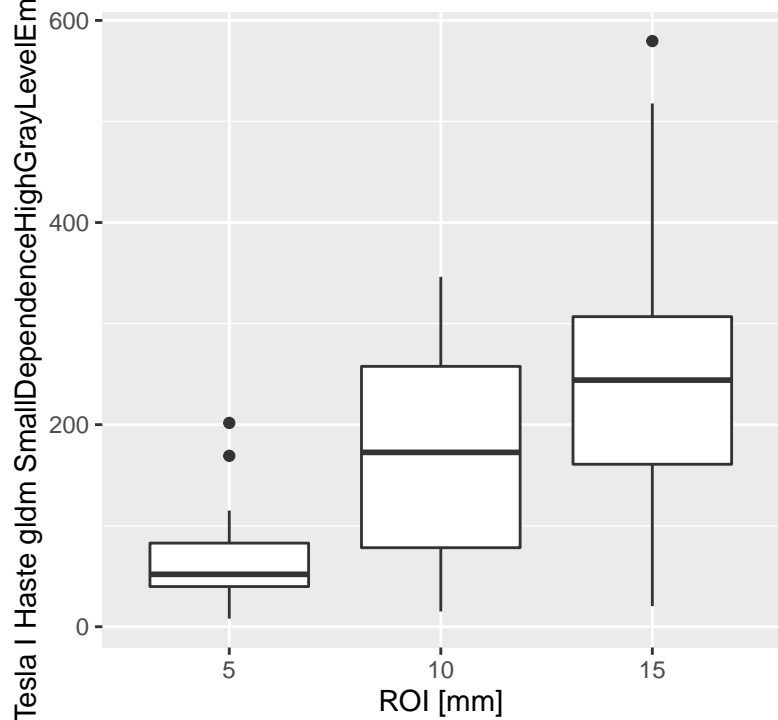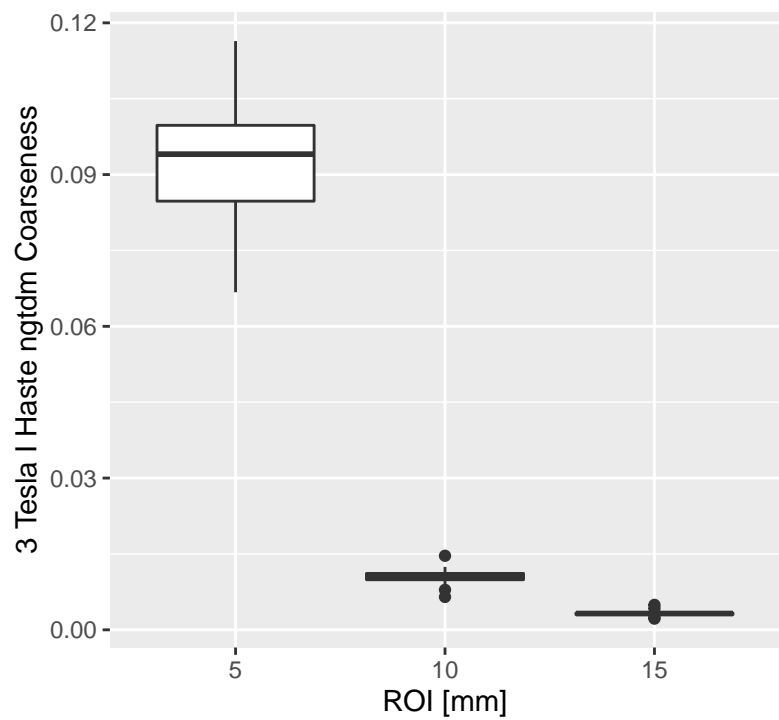

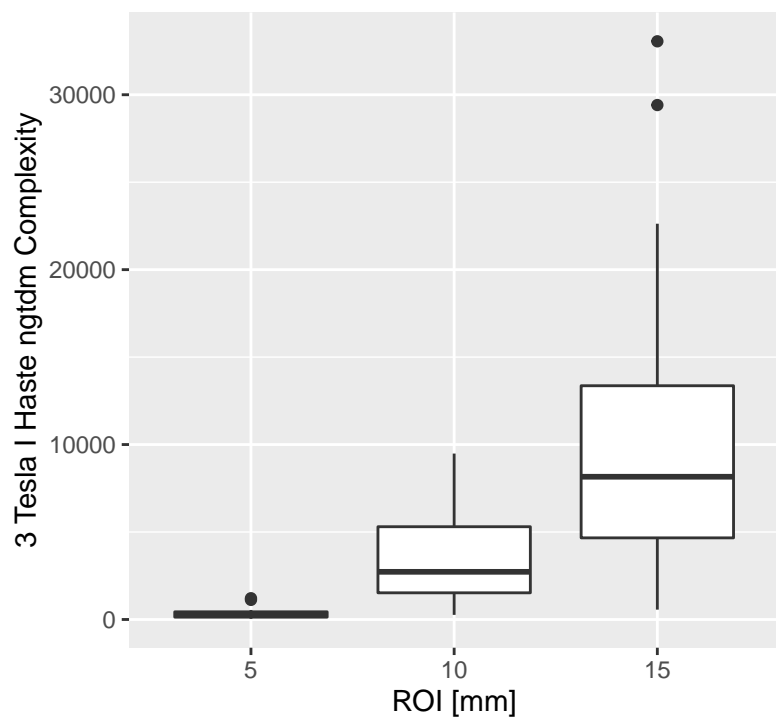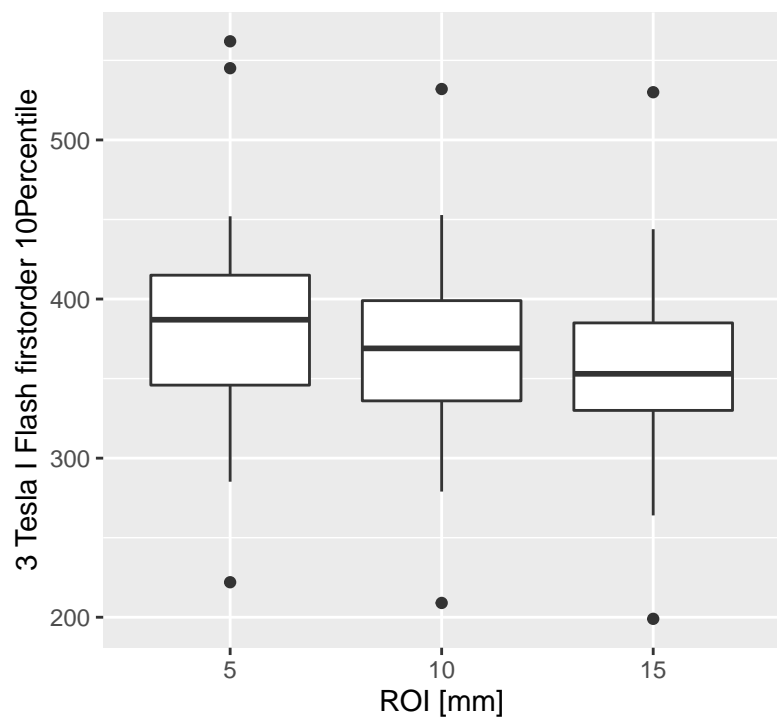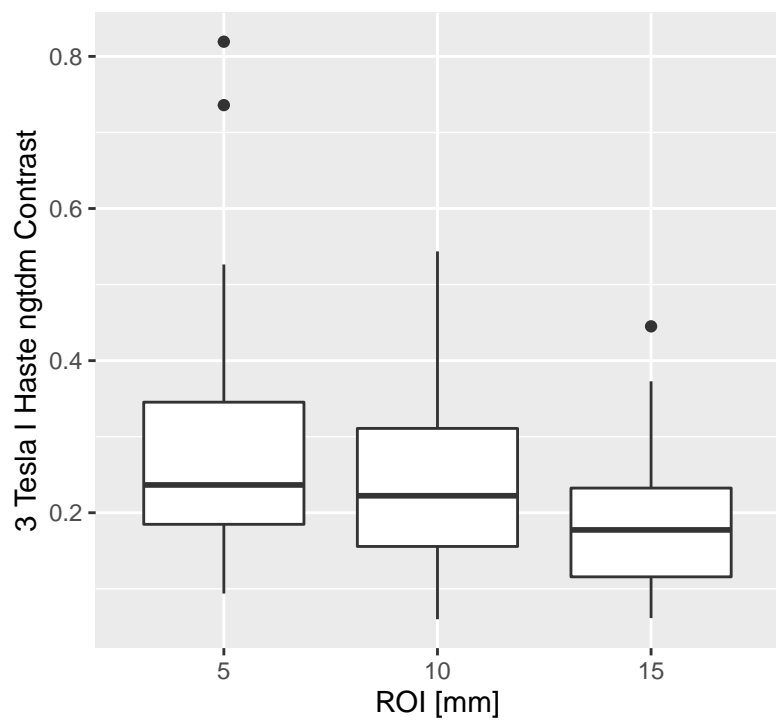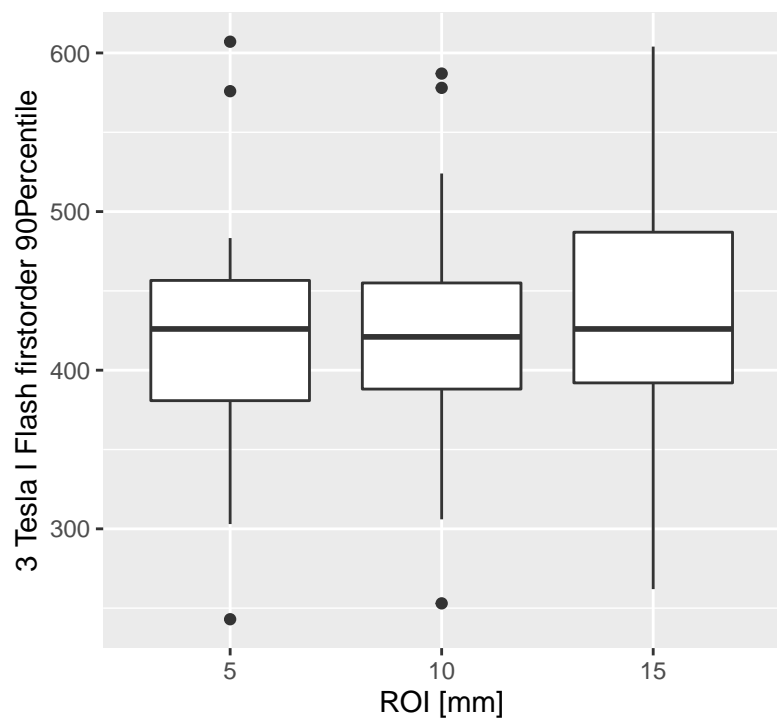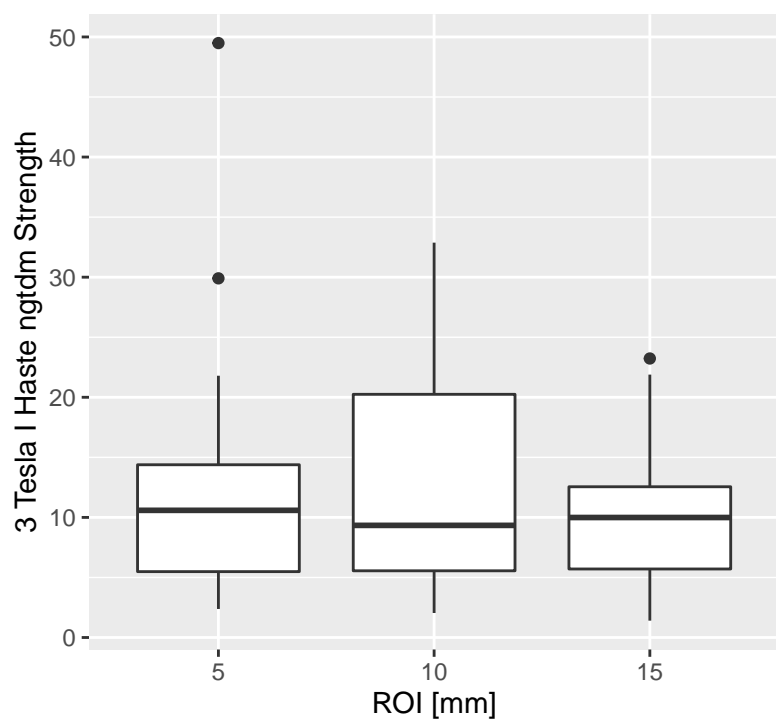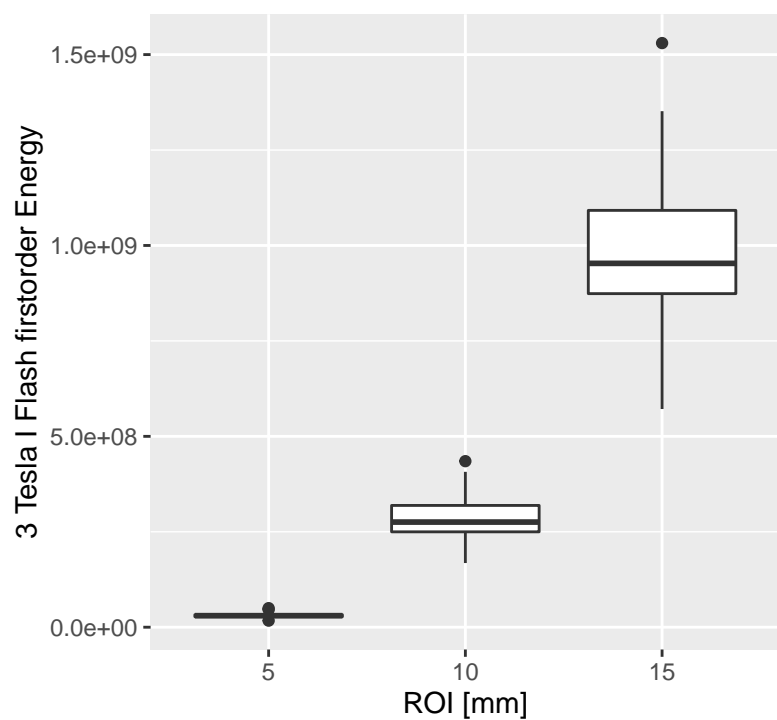



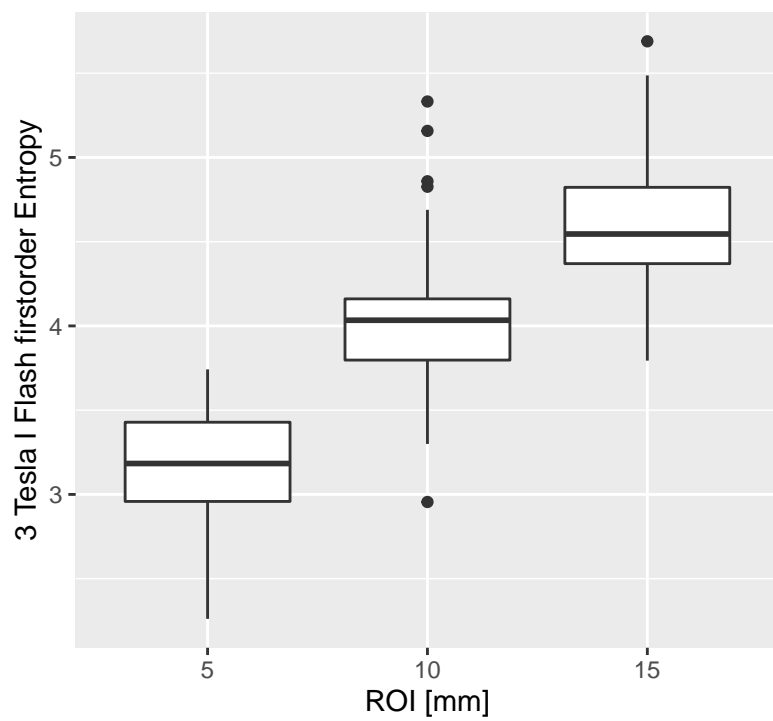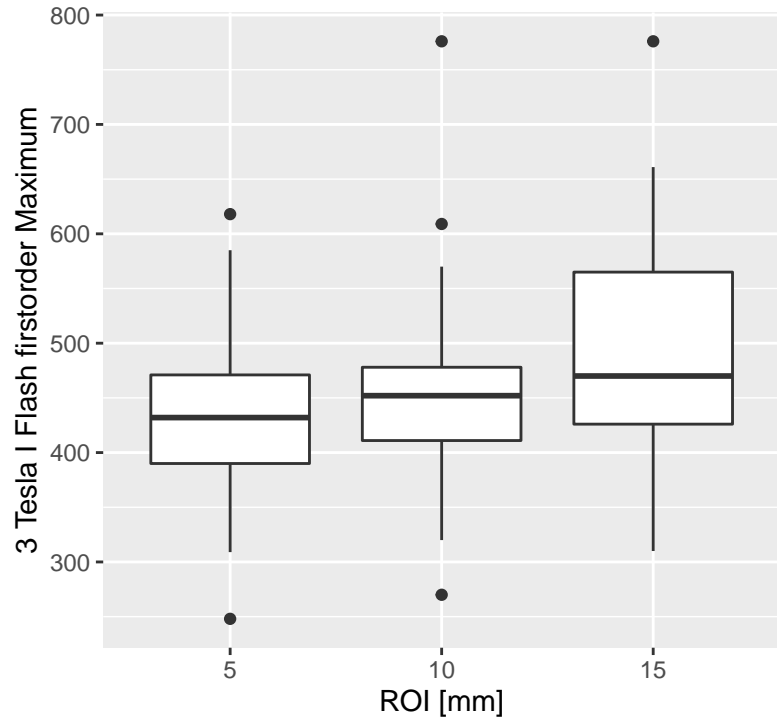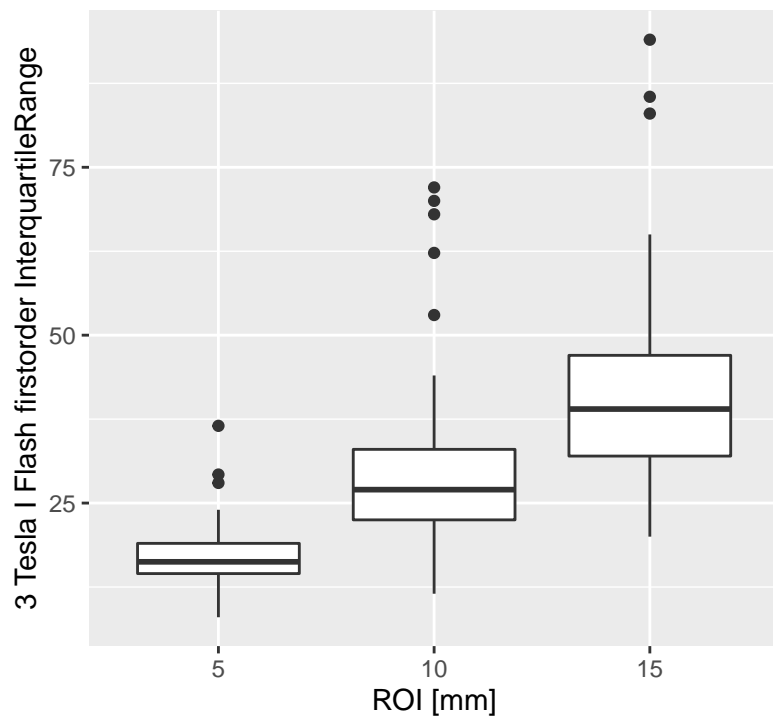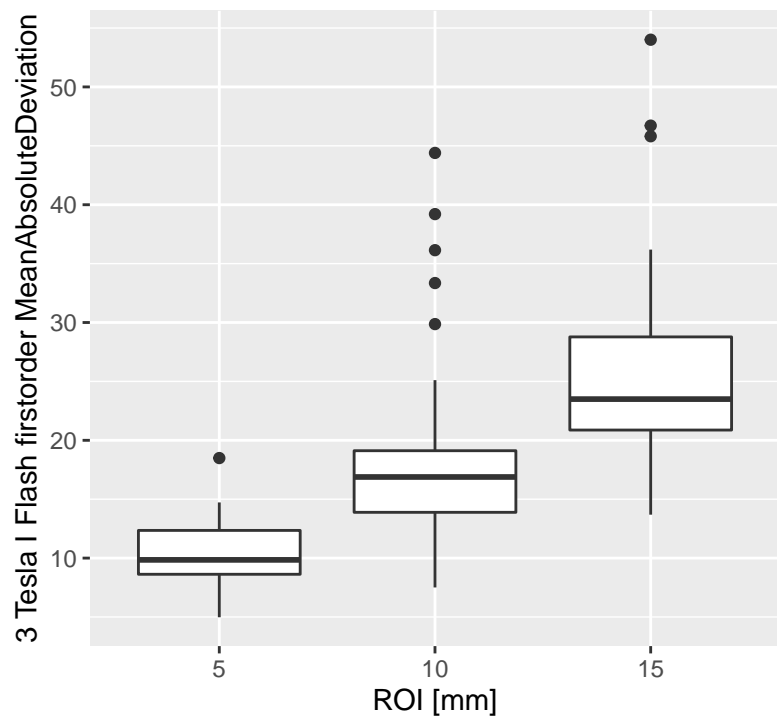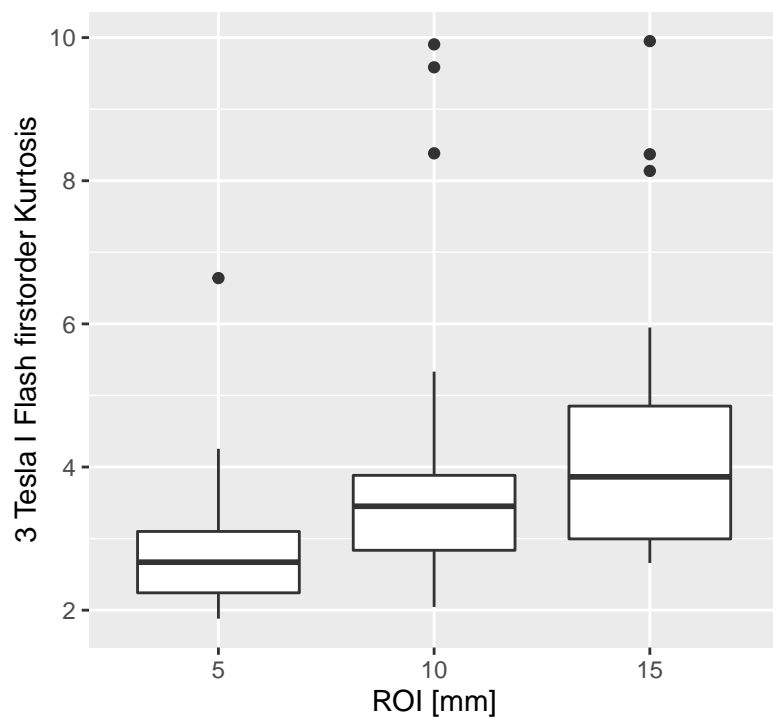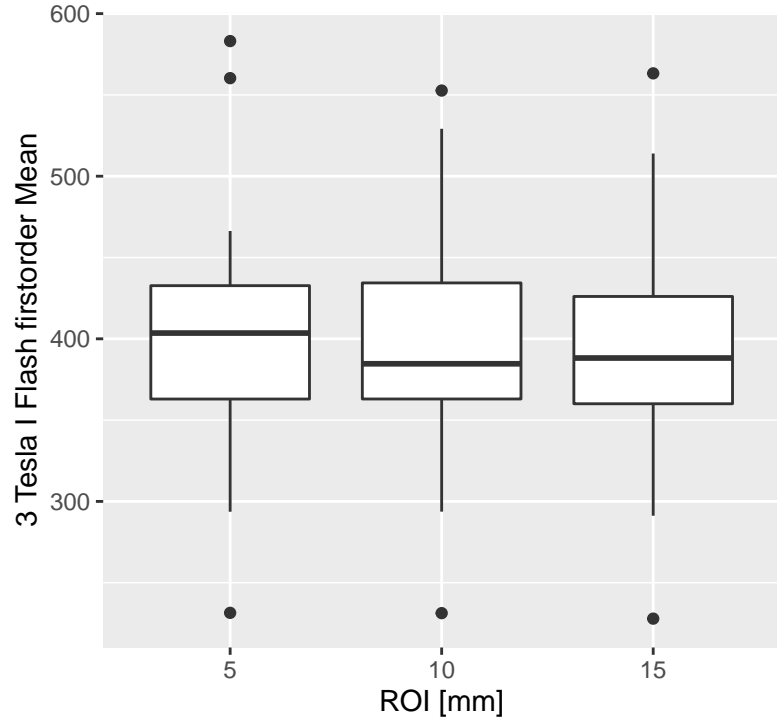

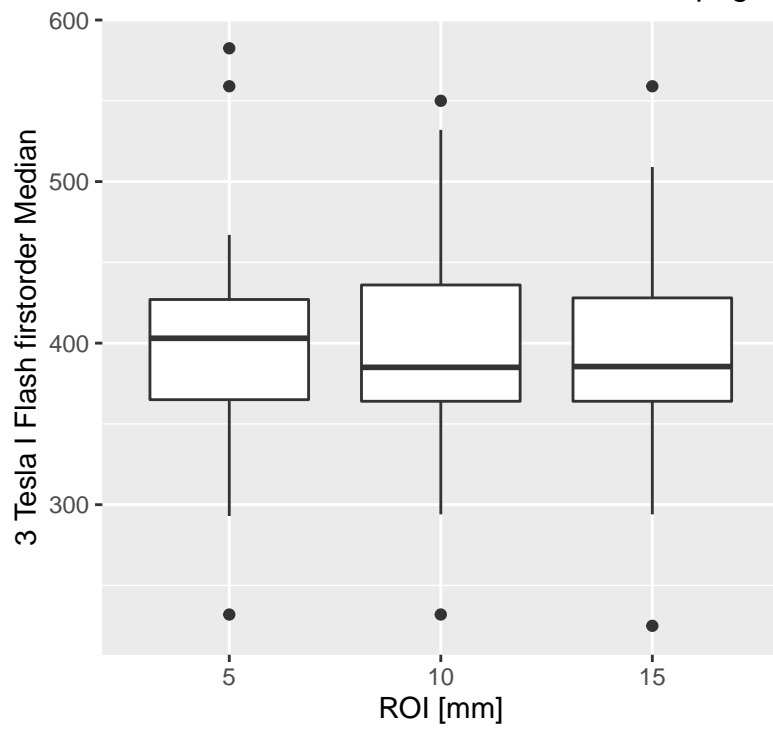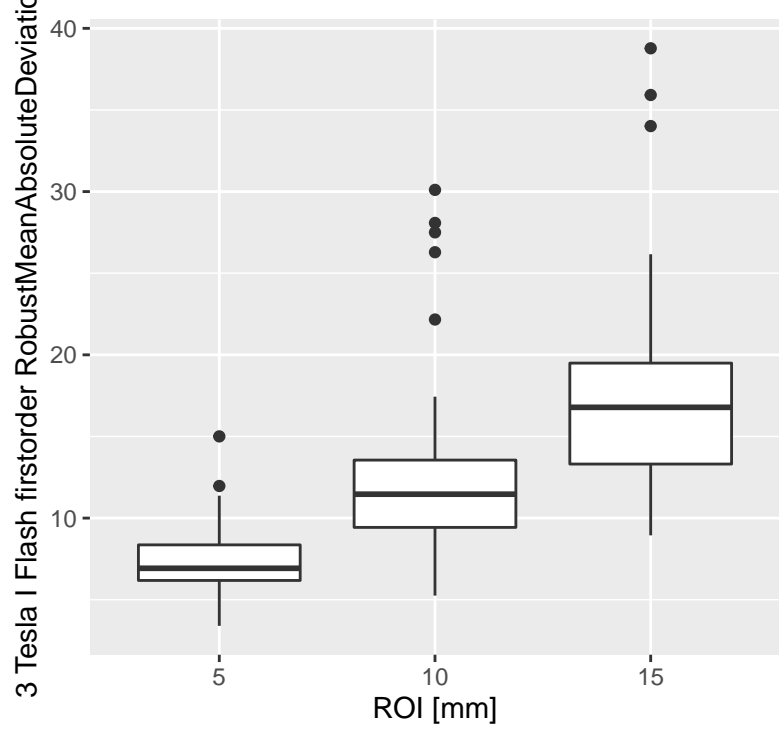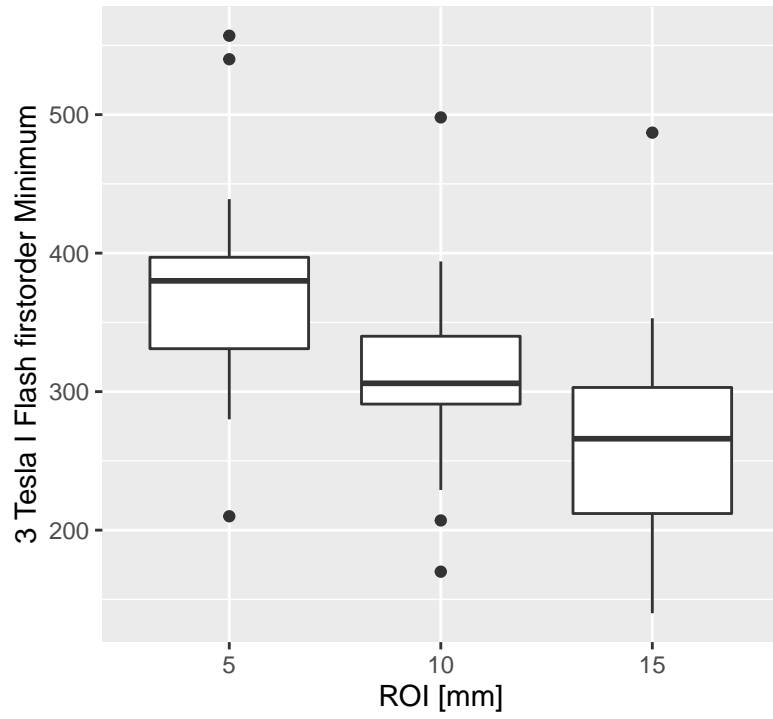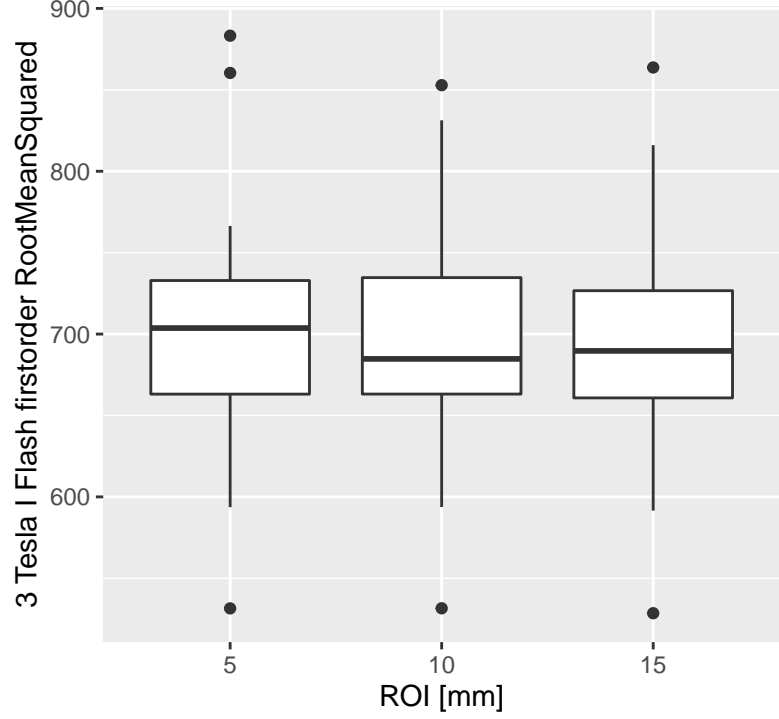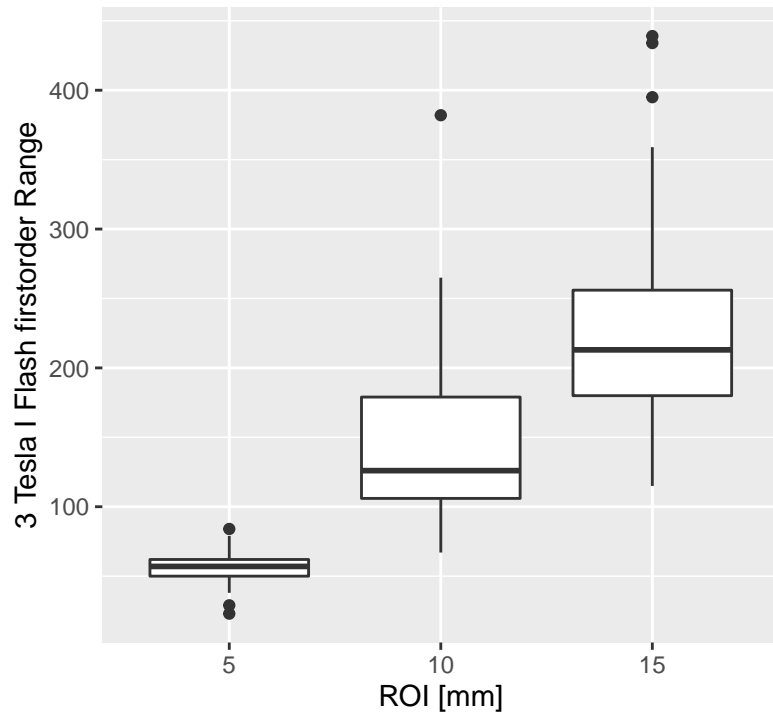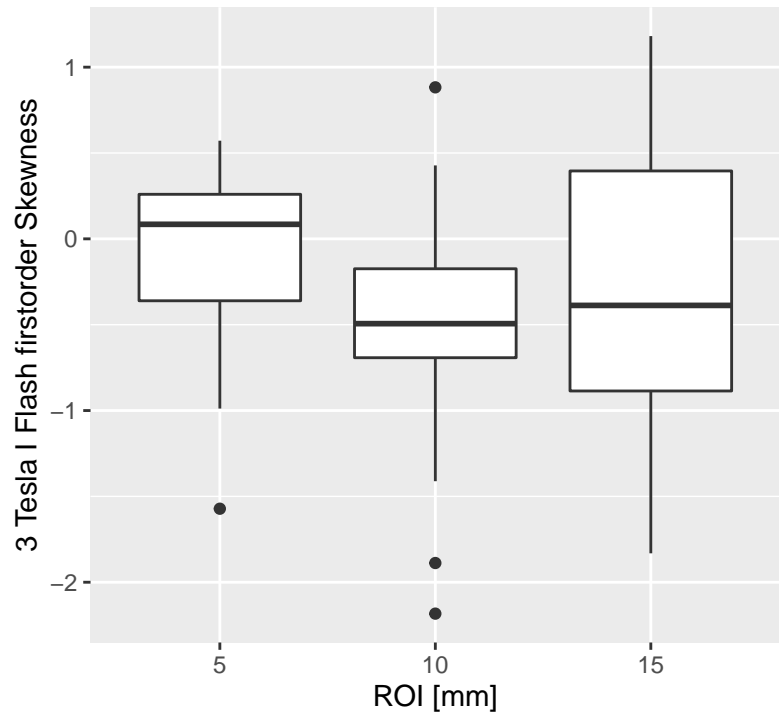

3 Tesla I Flash firstorder TotalEnergy

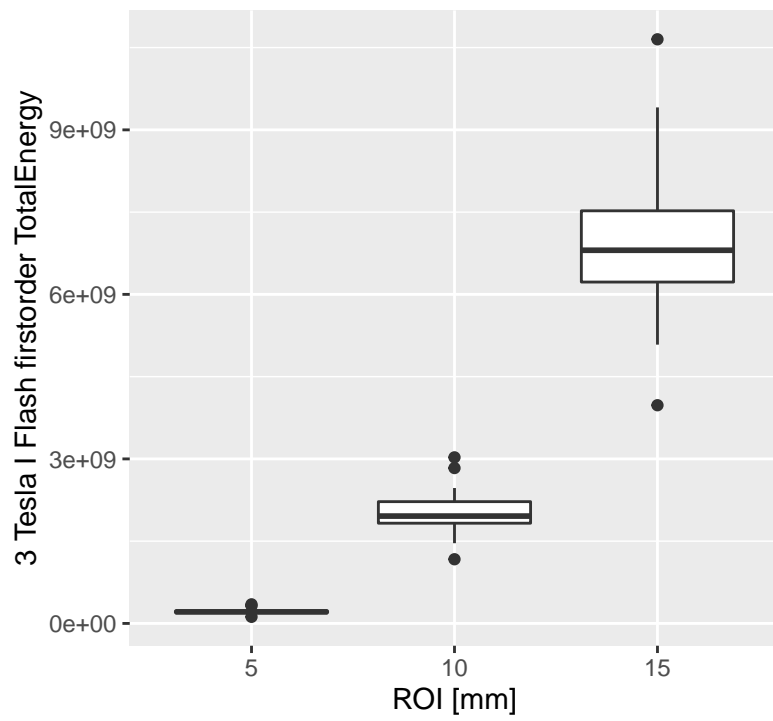

3 Tesla I Flash glcm Autocorrelation

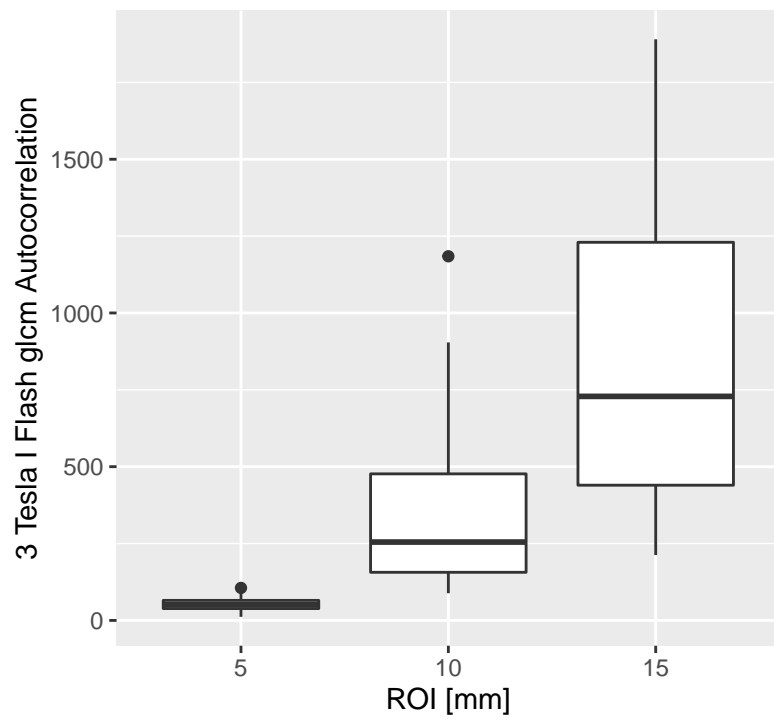

3 Tesla I Flash firstorder Uniformity

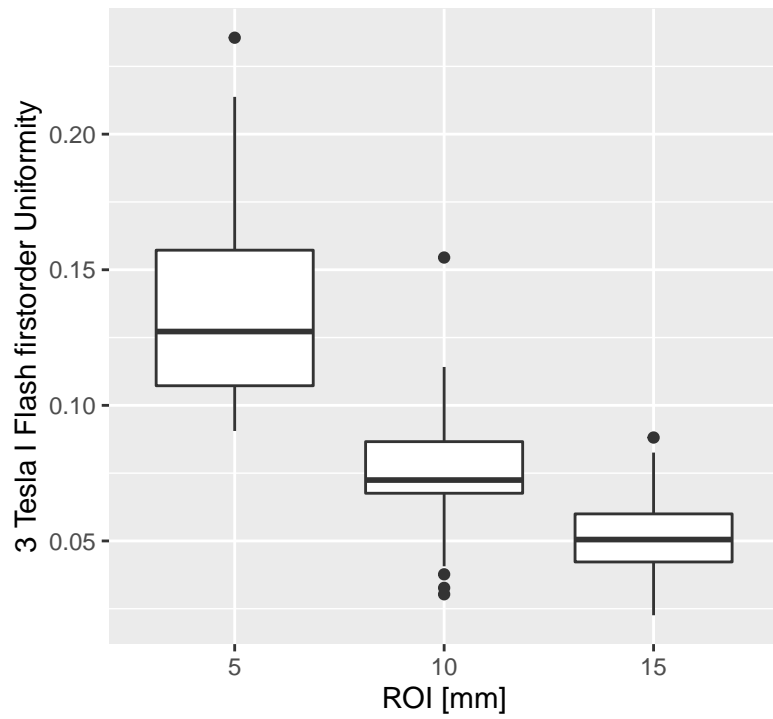

3 Tesla I Flash glcm ClusterProminence

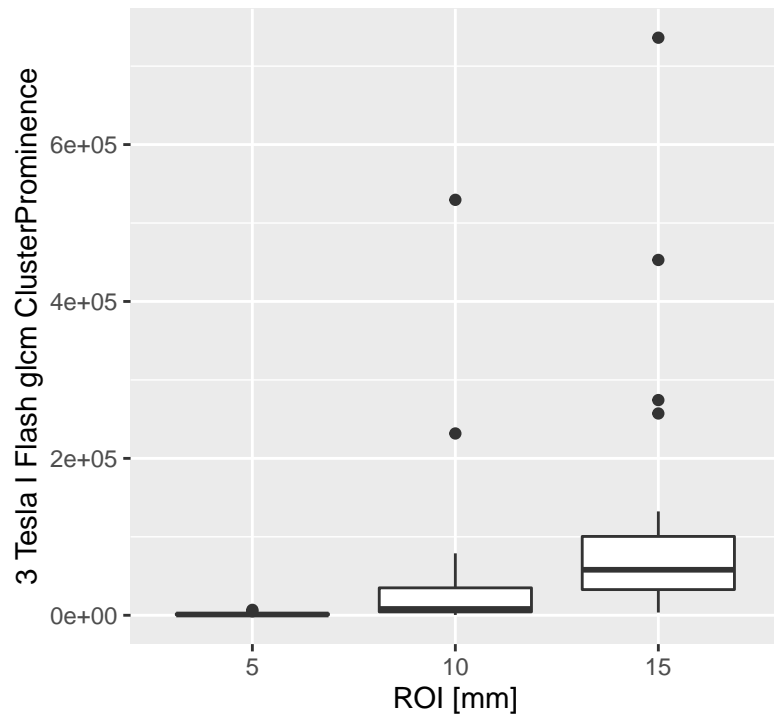

3 Tesla I Flash firstorder Variance

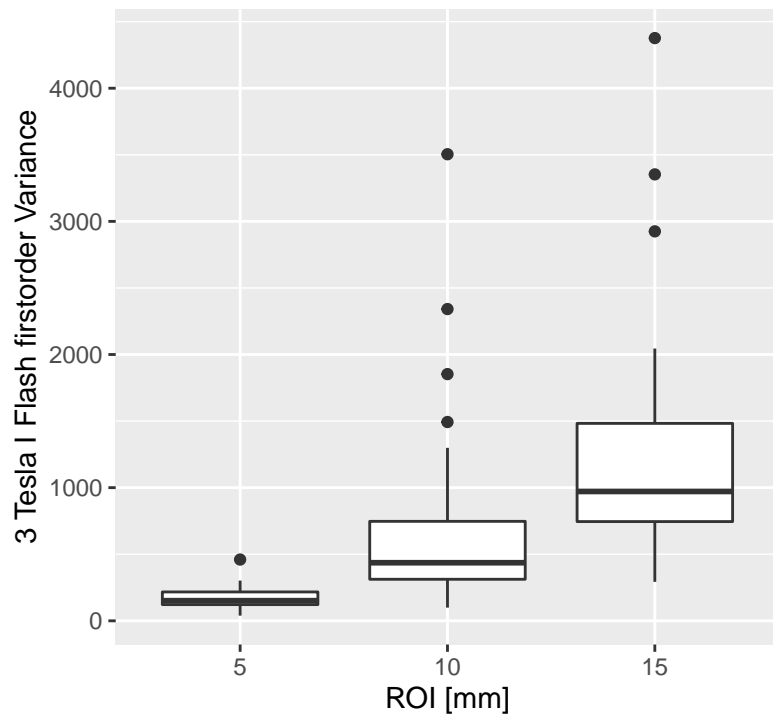

3 Tesla I Flash glcm ClusterShade

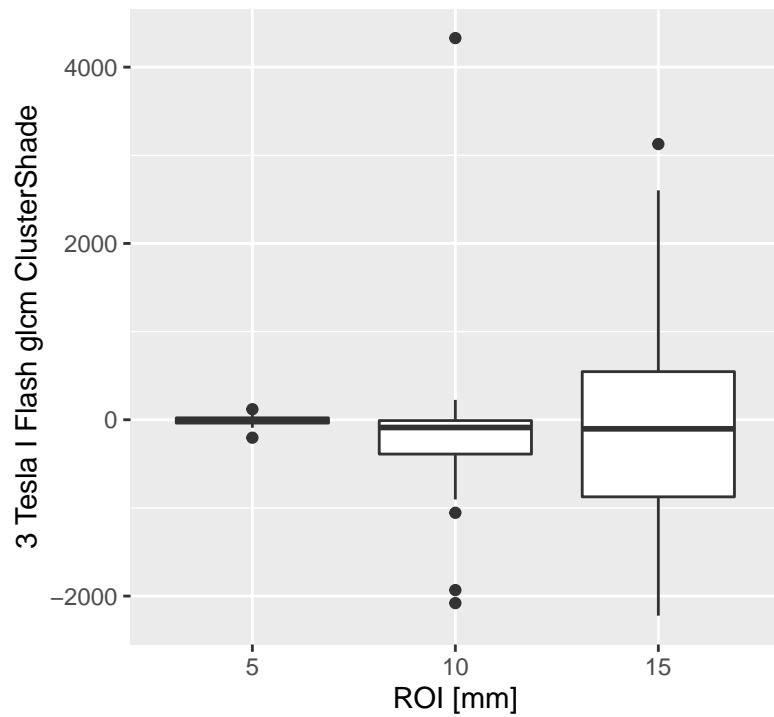

3 Tesla I Flash glcm ClusterTendency

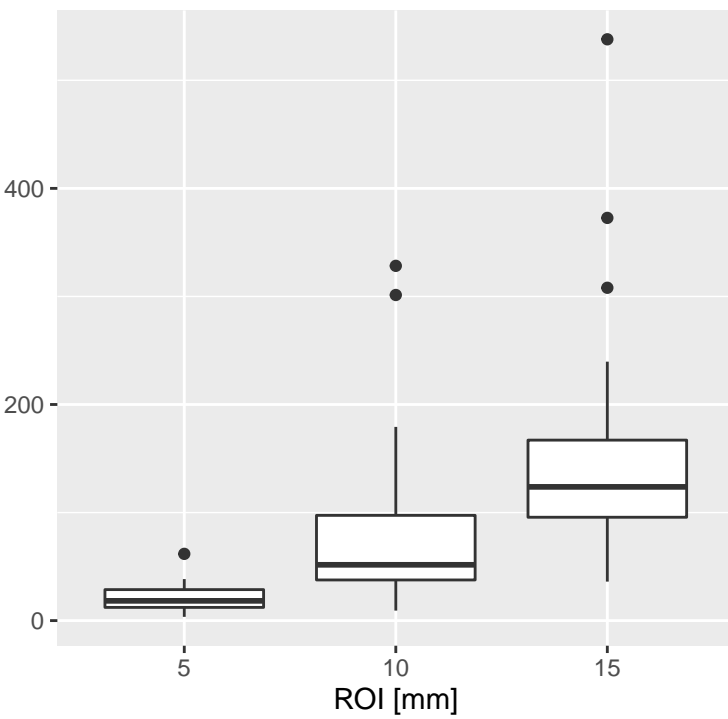

3 Tesla I Flash glcm DifferenceAverage

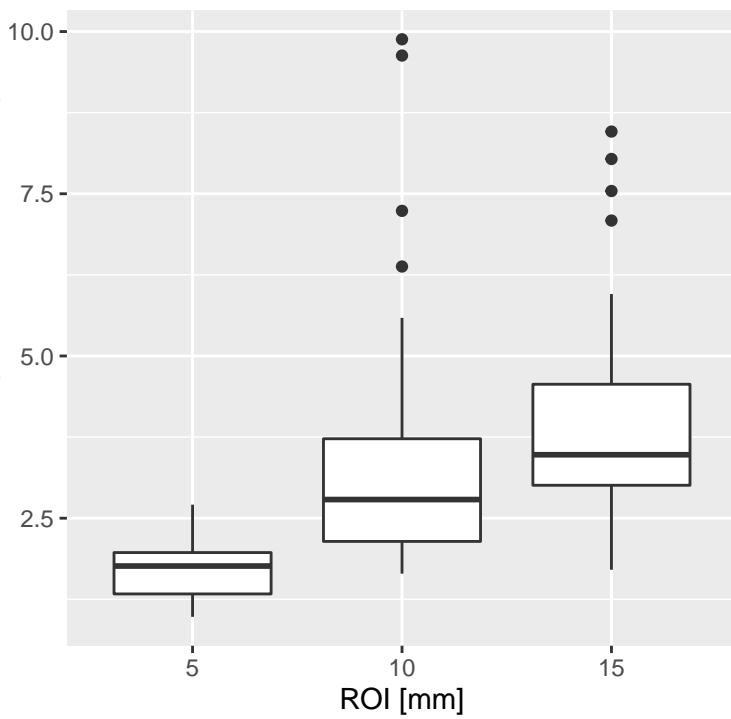

3 Tesla I Flash glcm Contrast

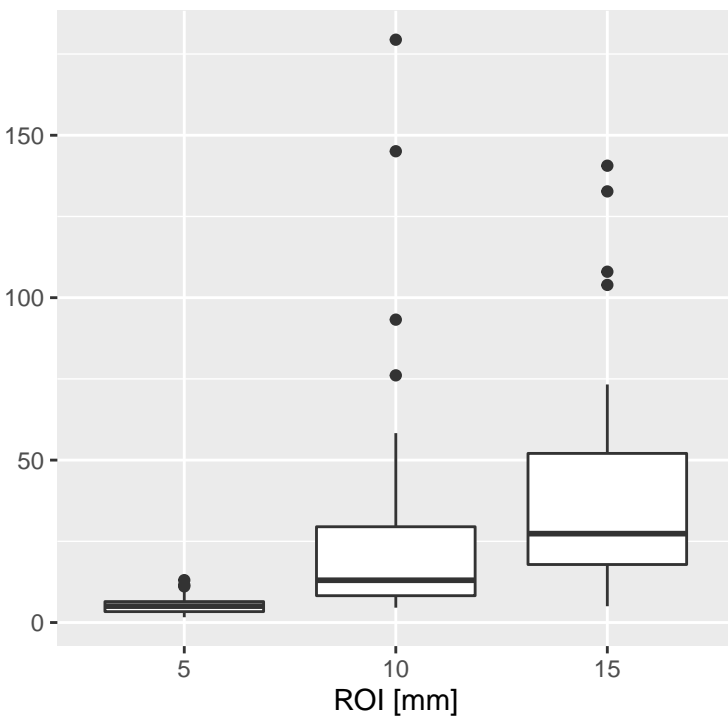

3 Tesla I Flash glcm DifferenceEntropy

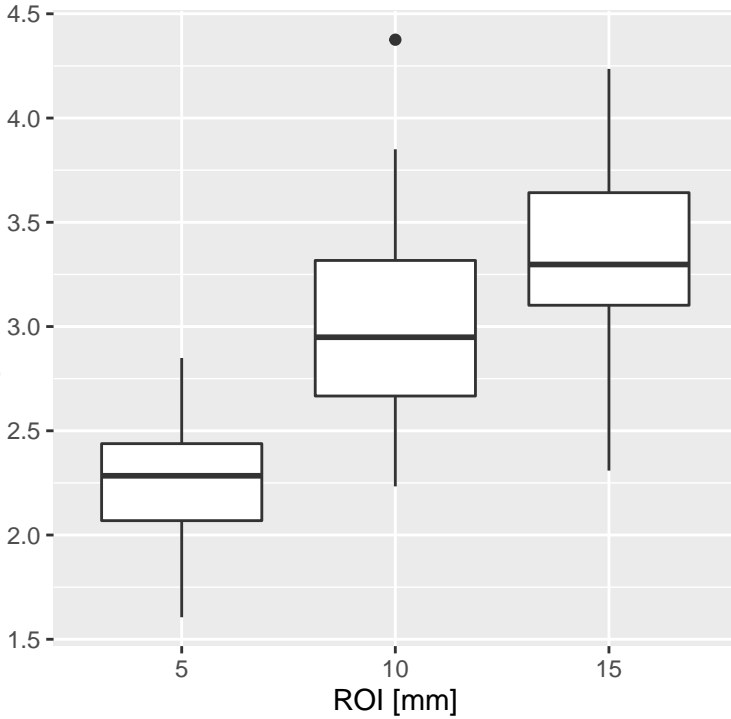

3 Tesla I Flash glcm Correlation

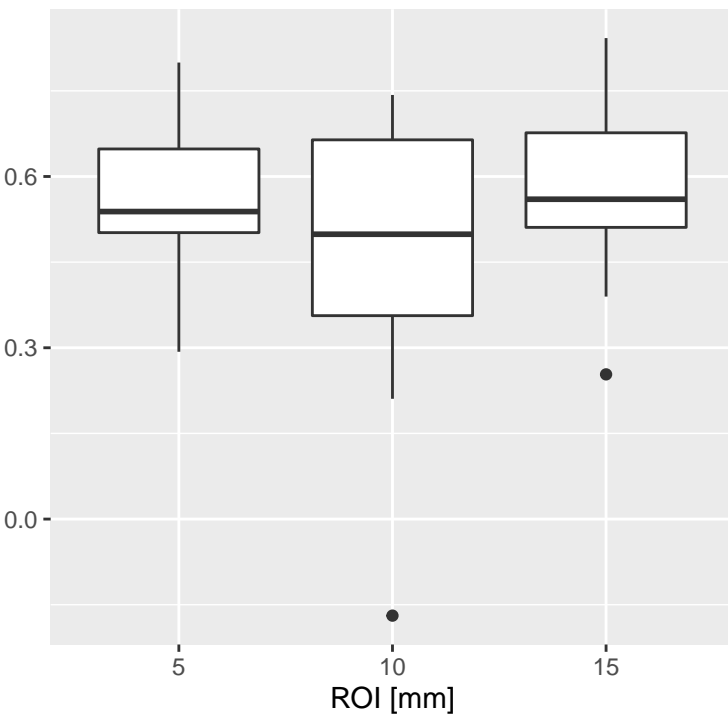

3 Tesla I Flash glcm DifferenceVariance

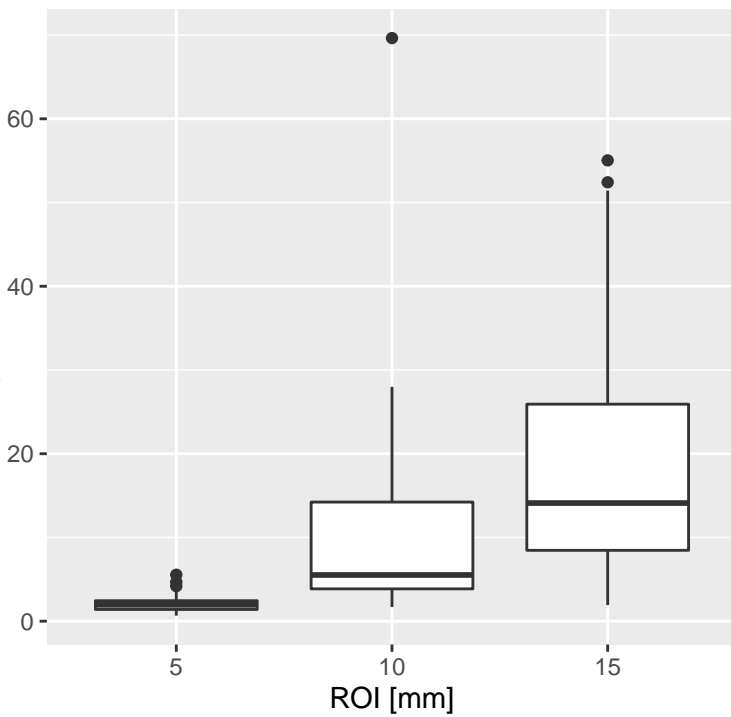

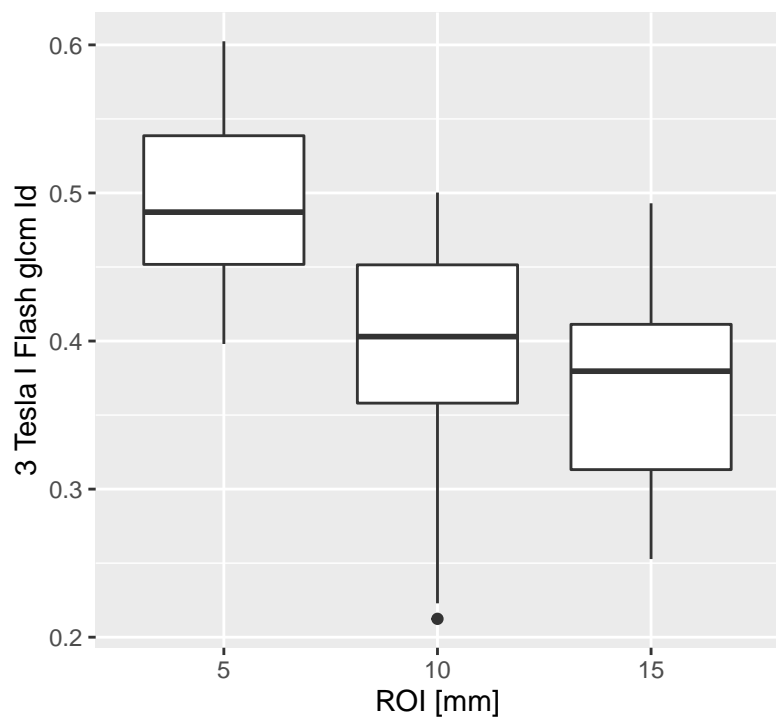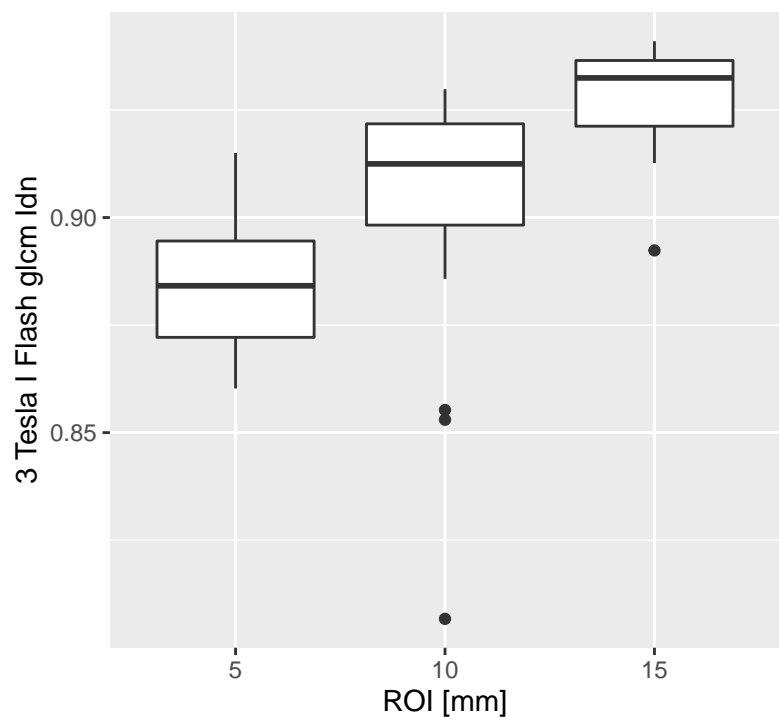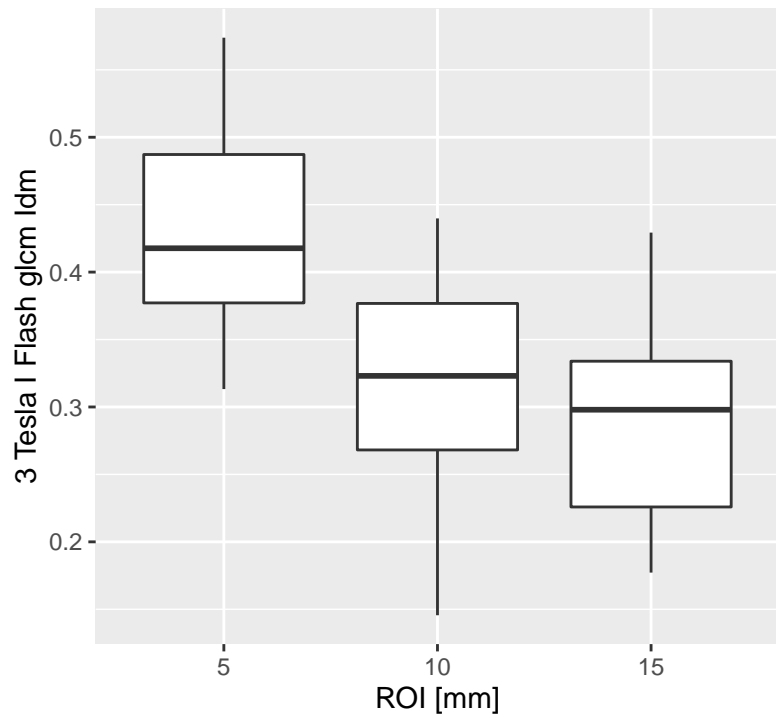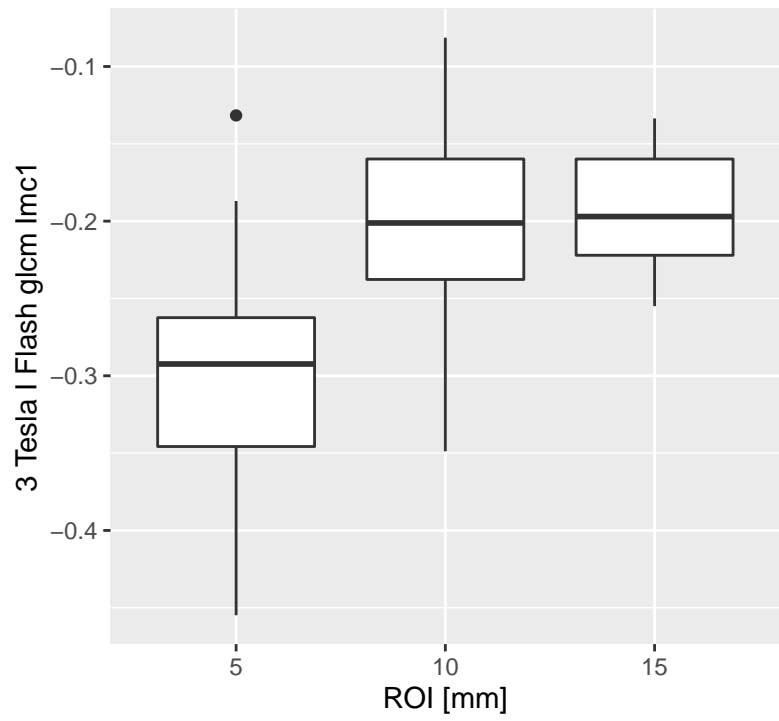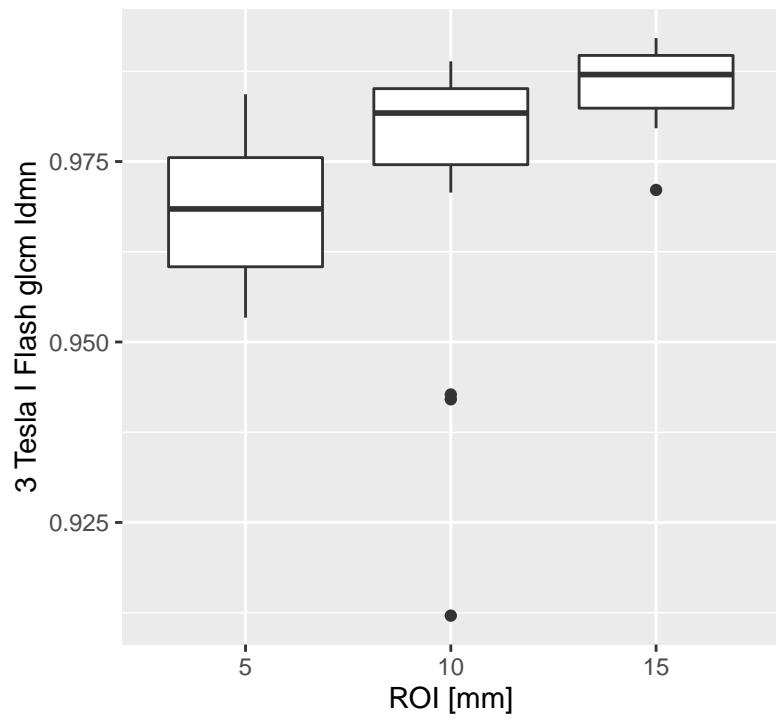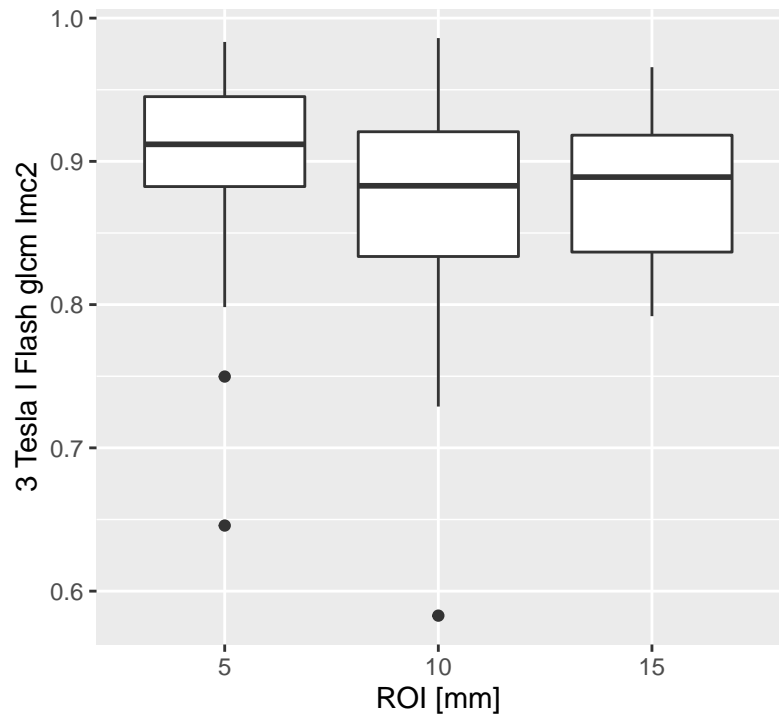

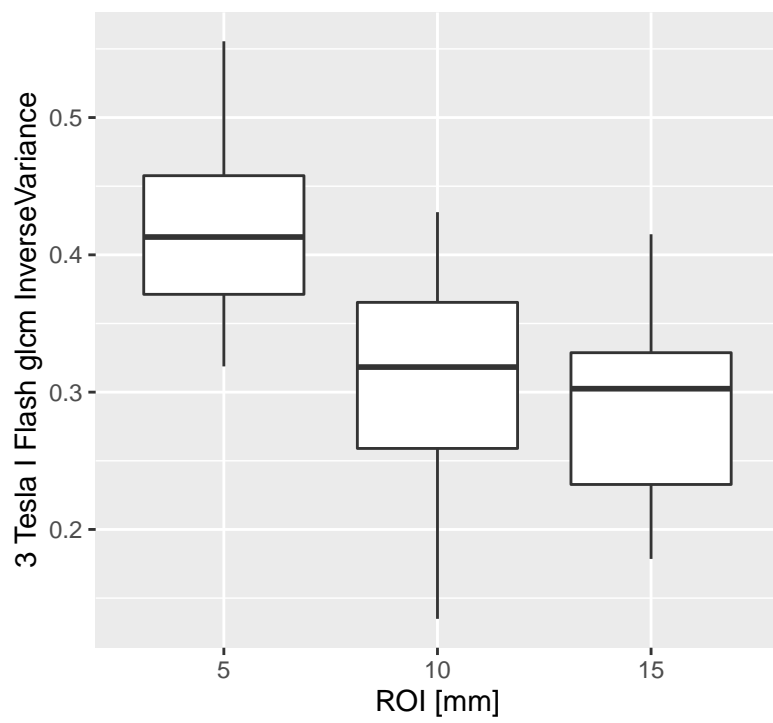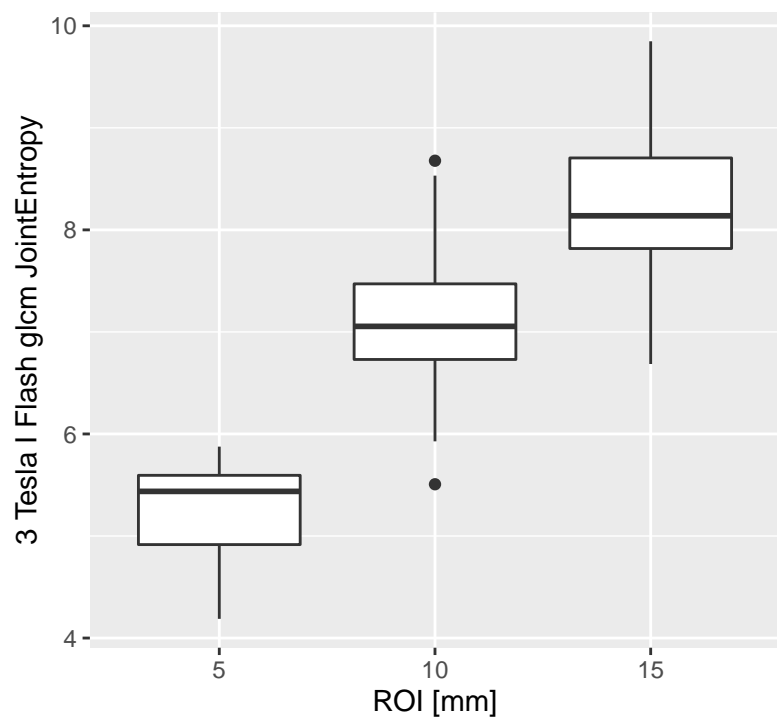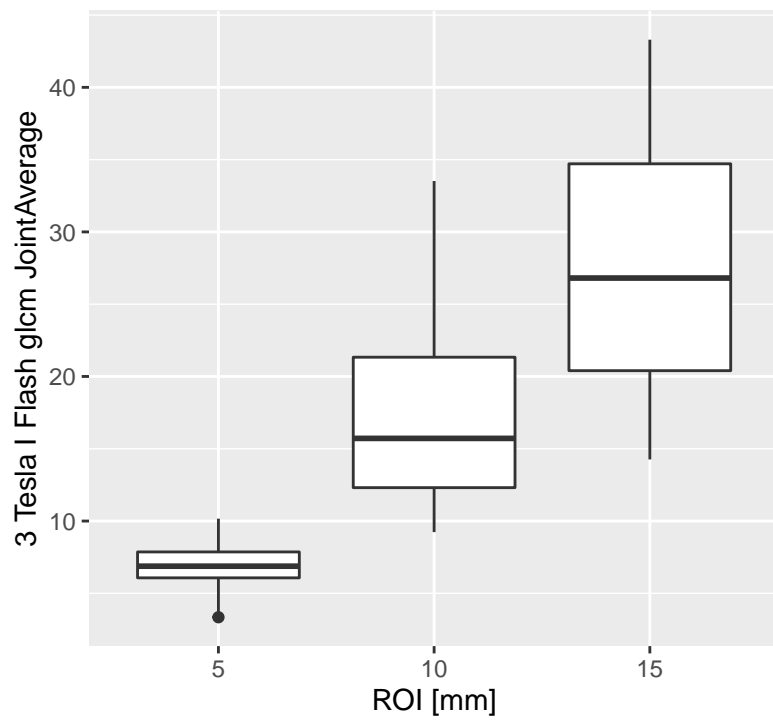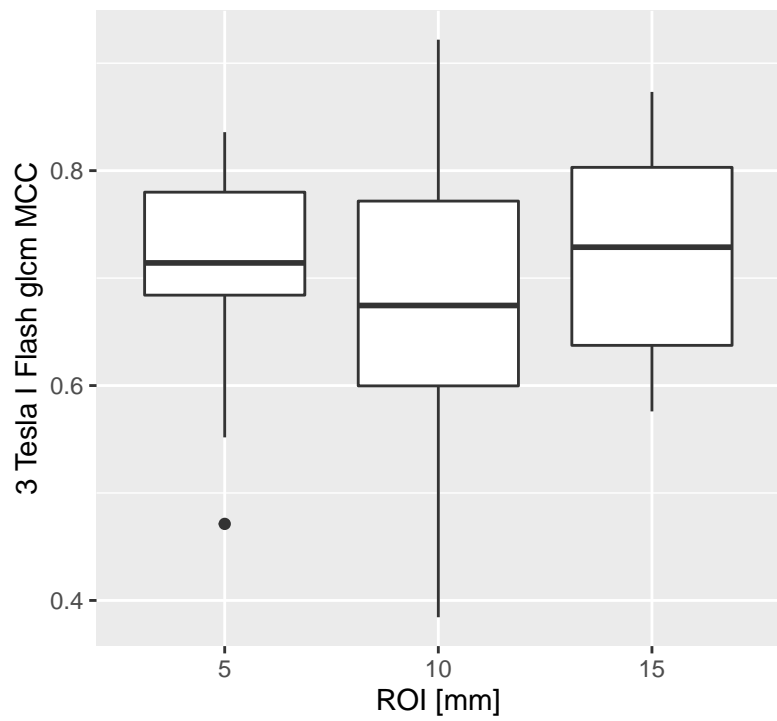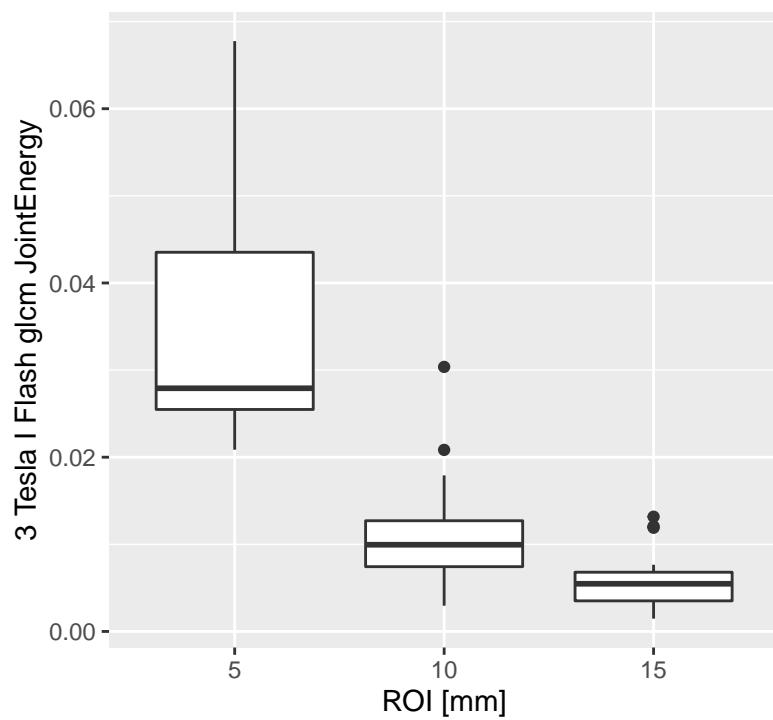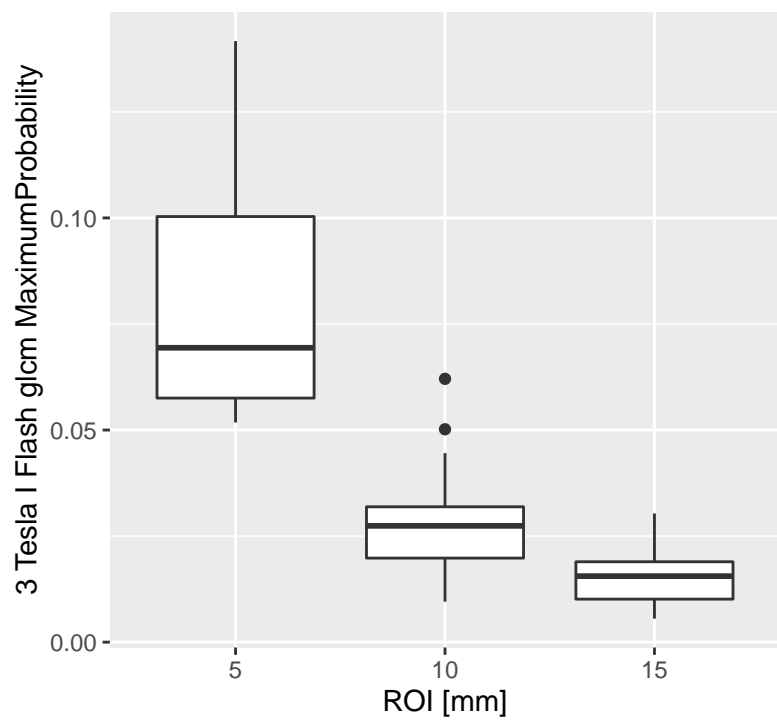

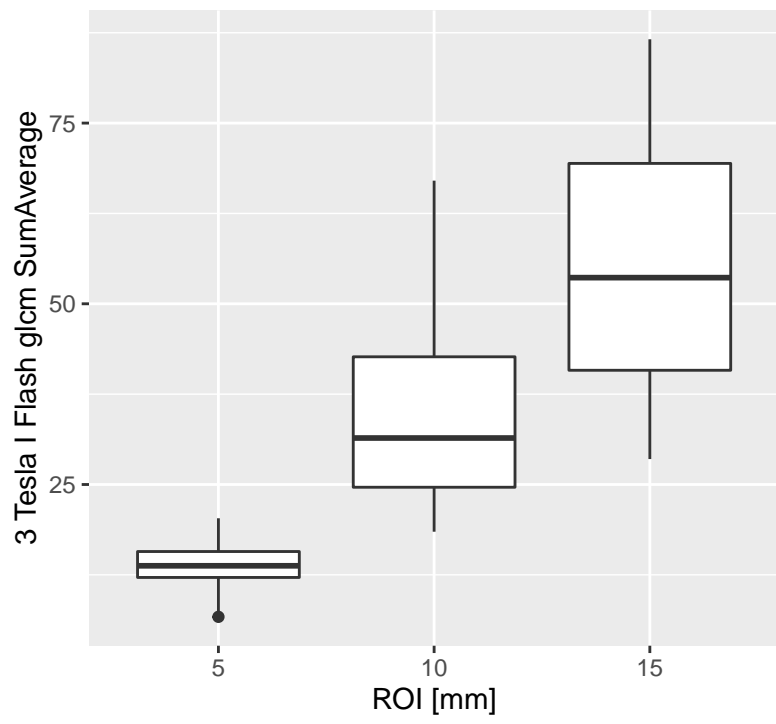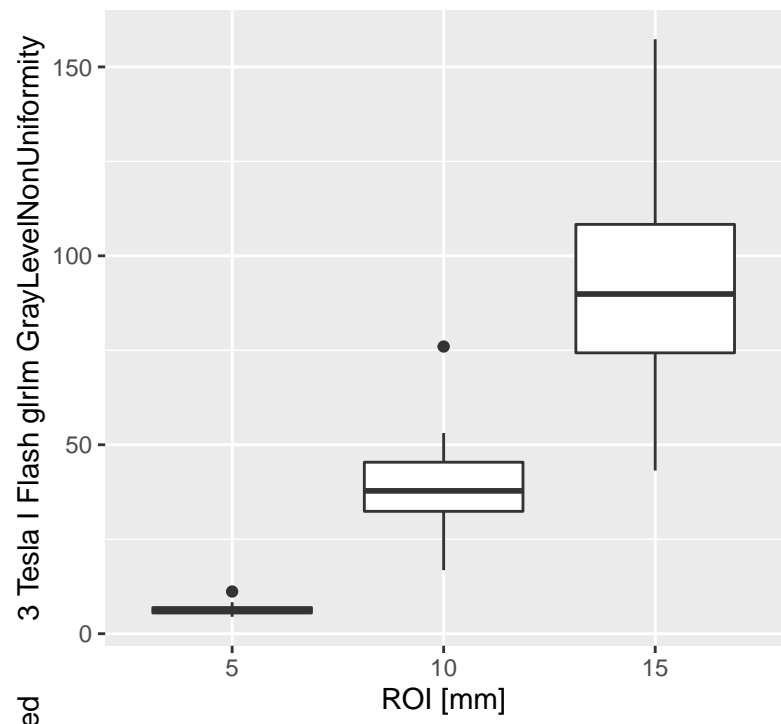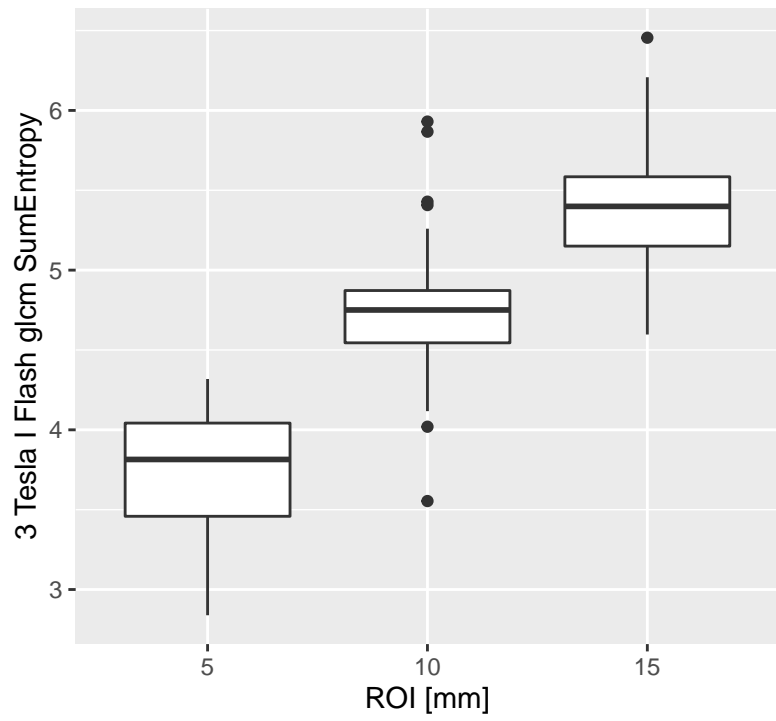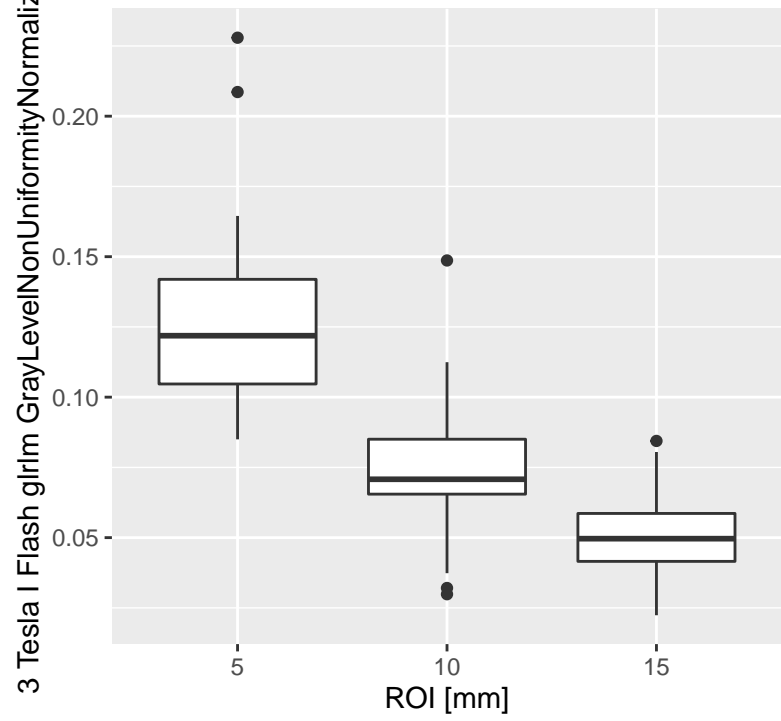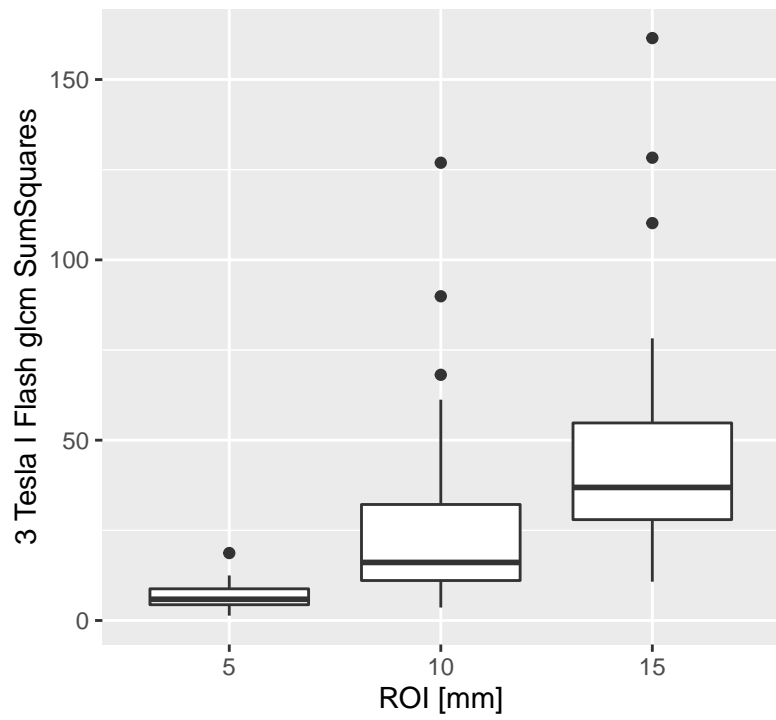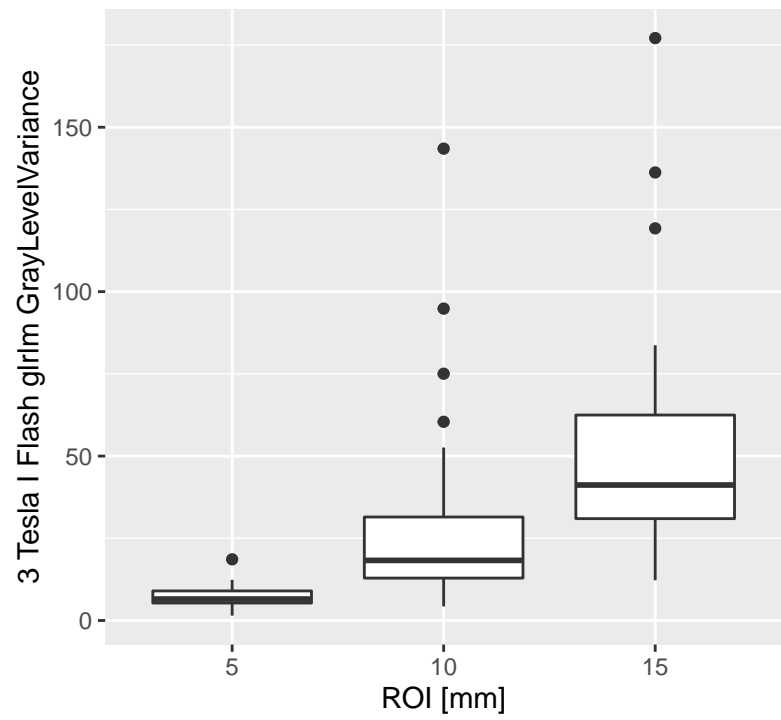

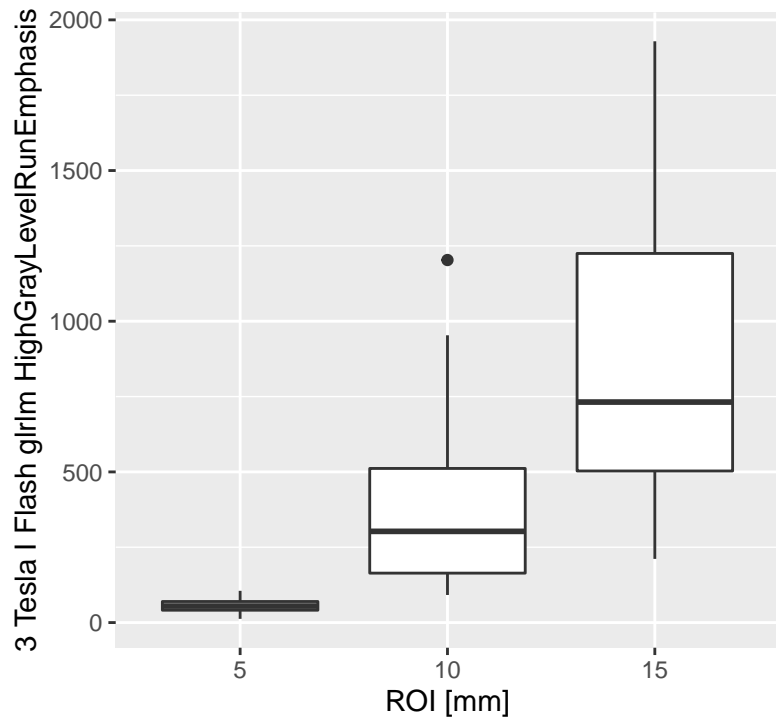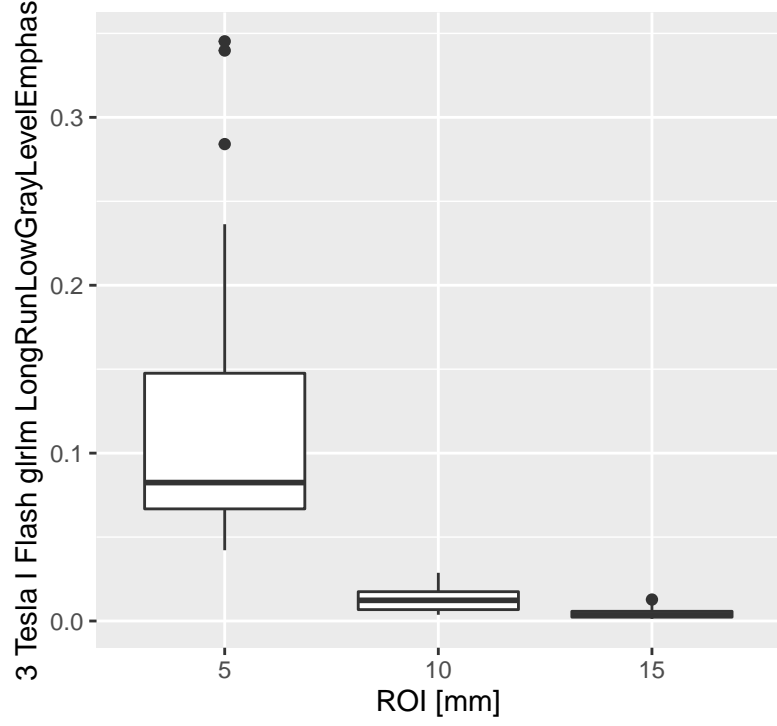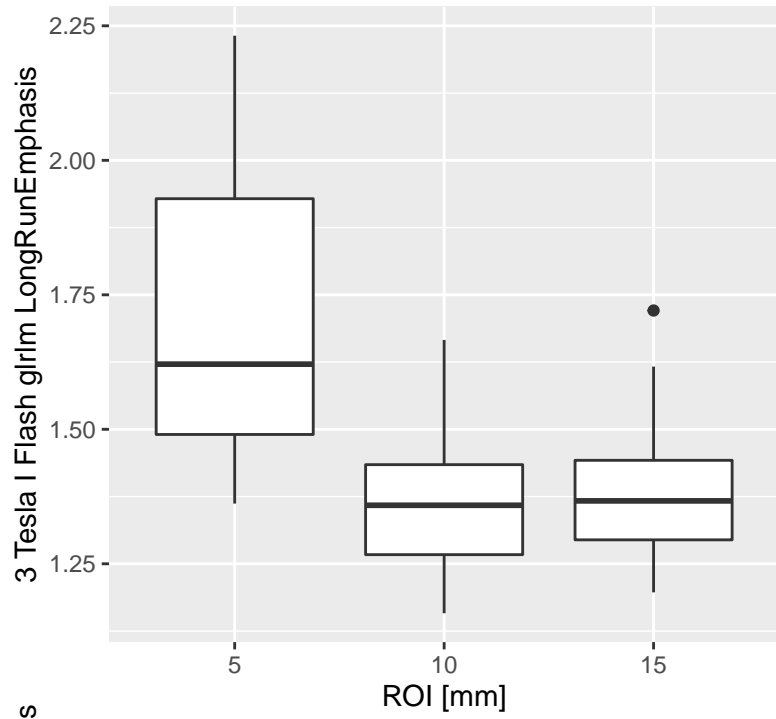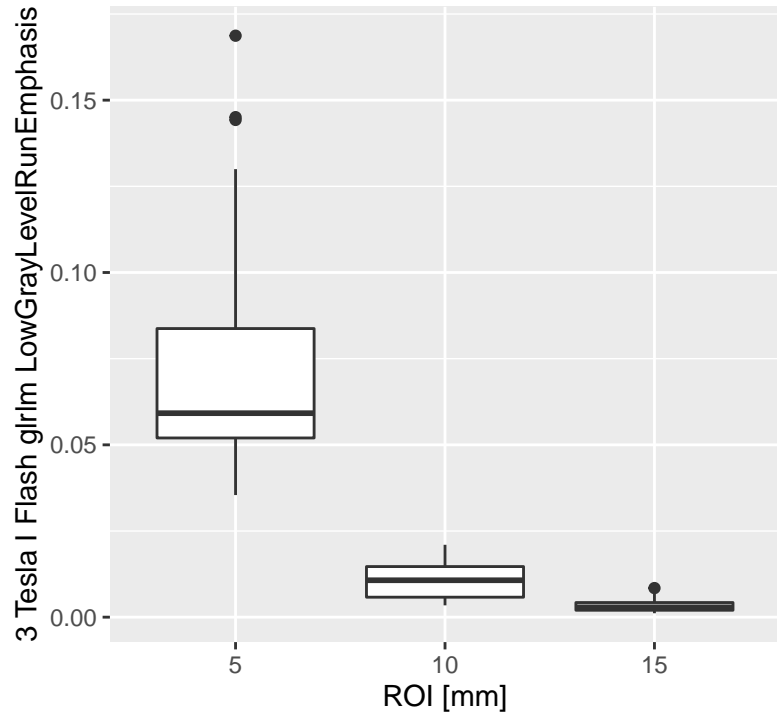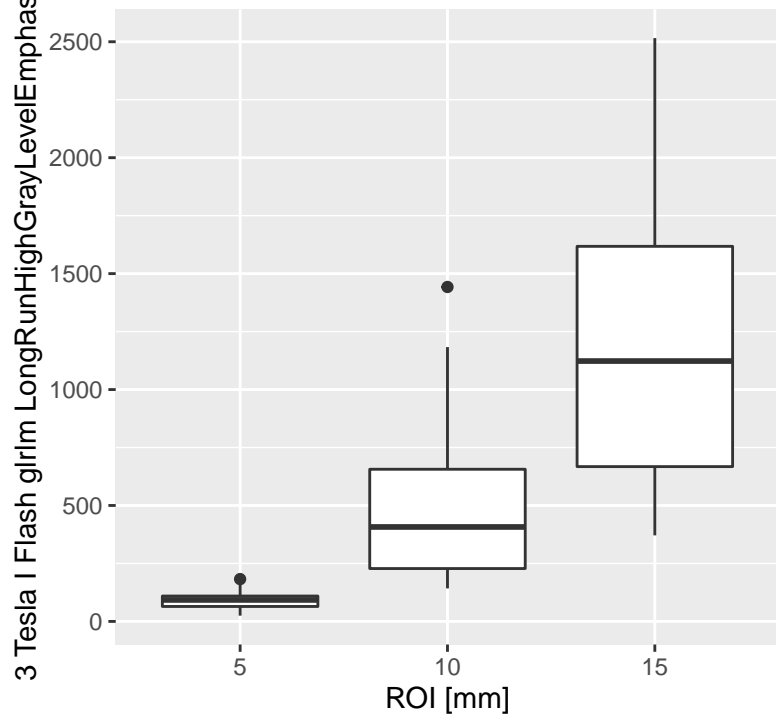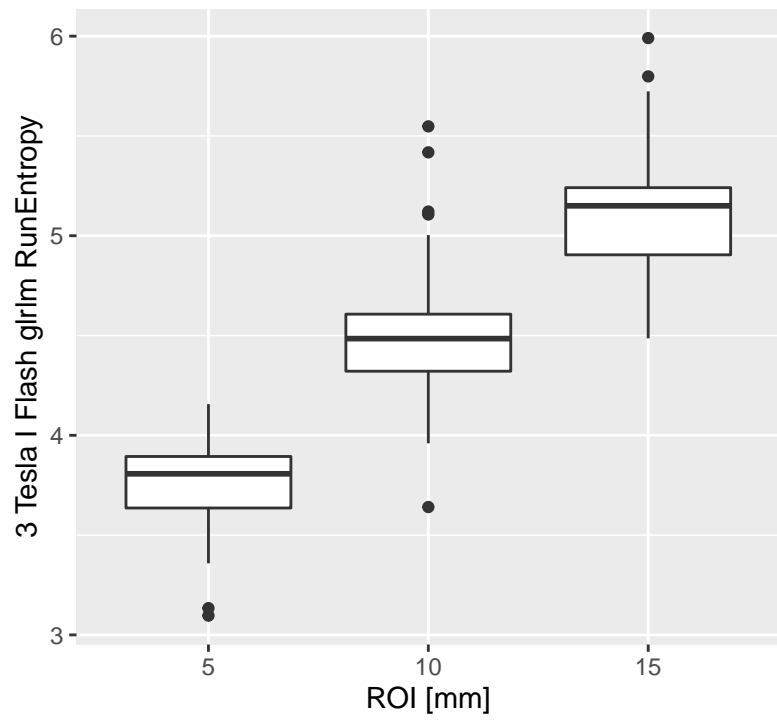



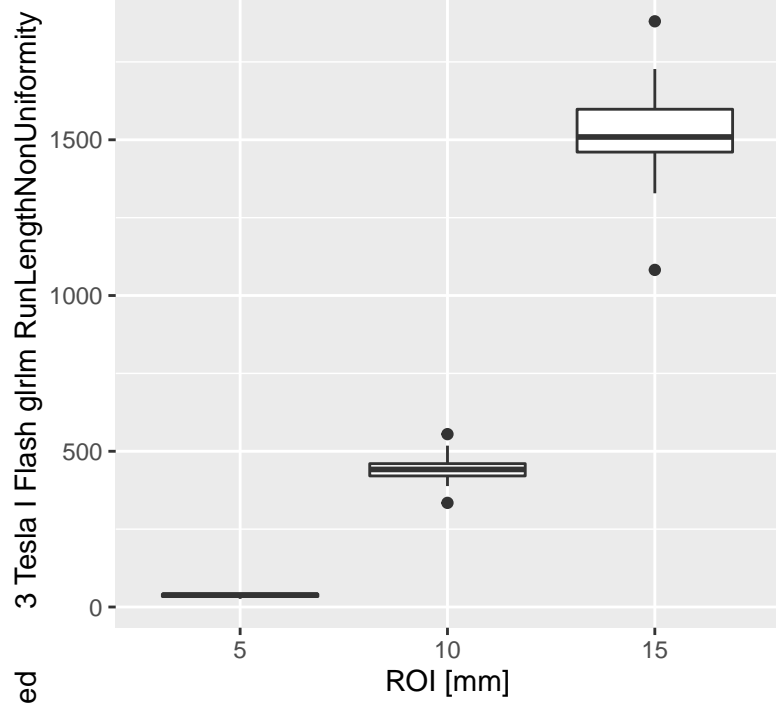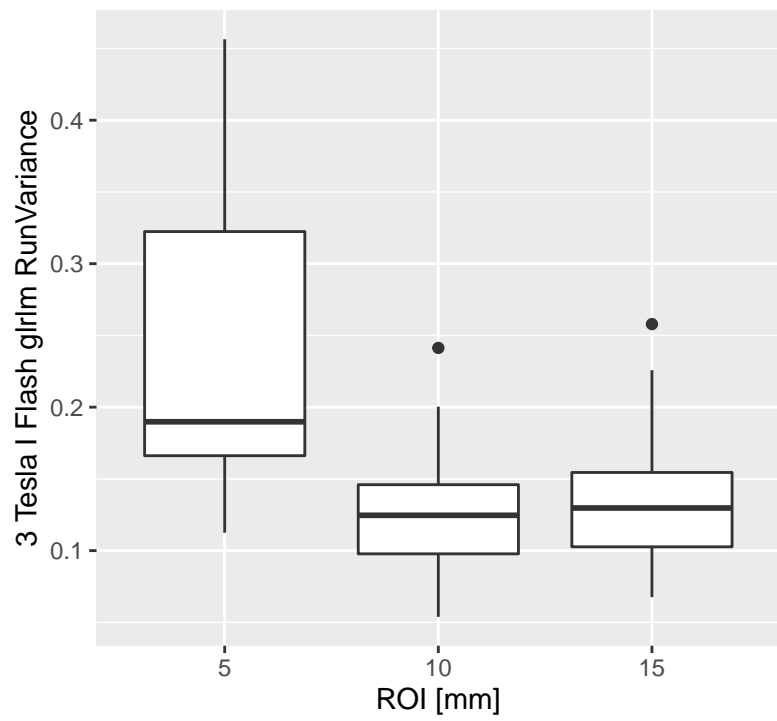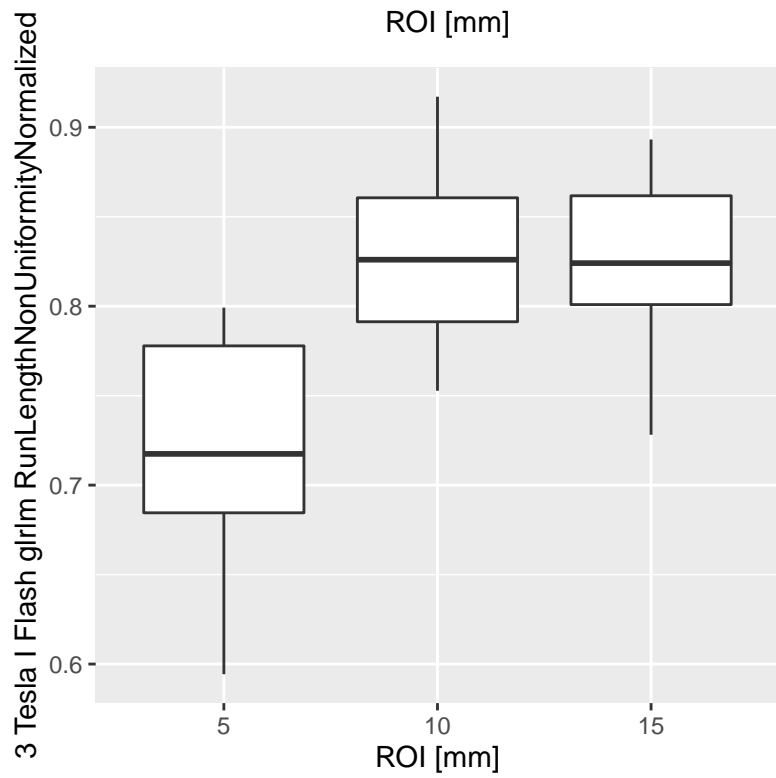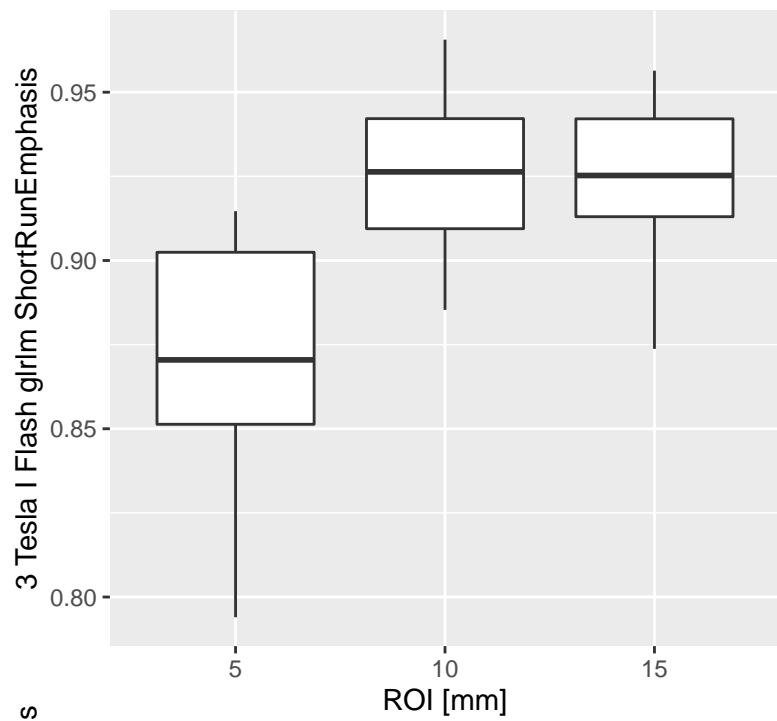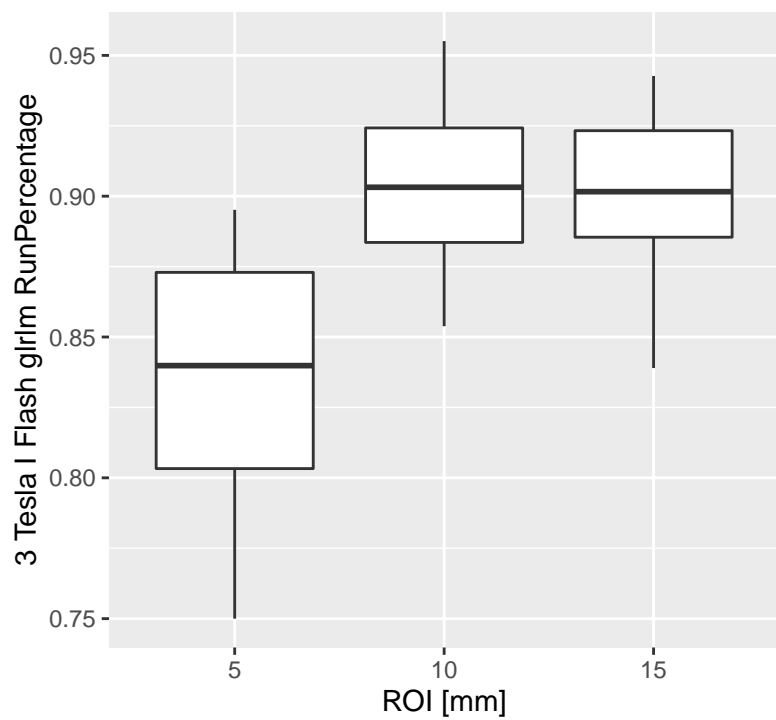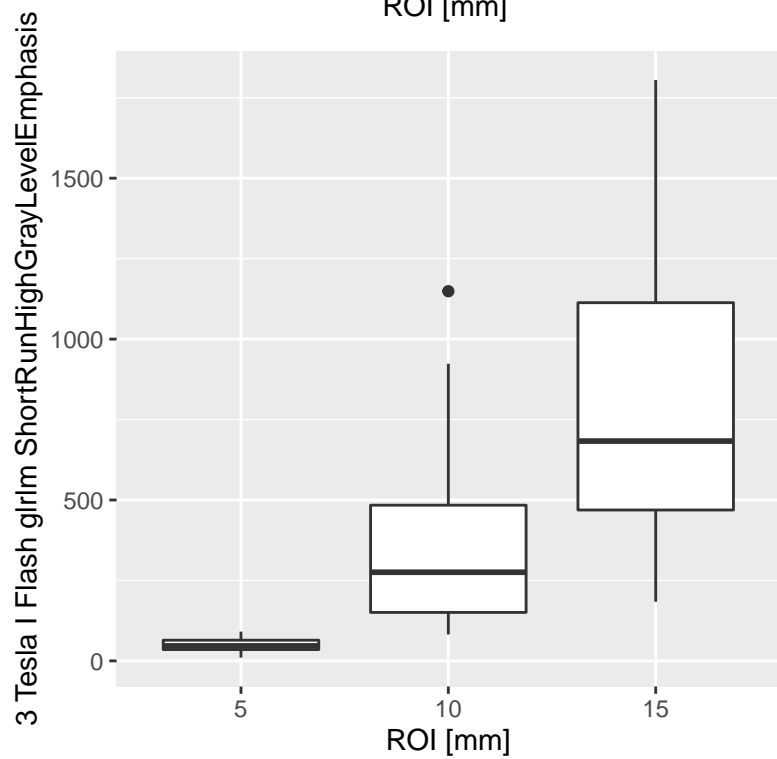

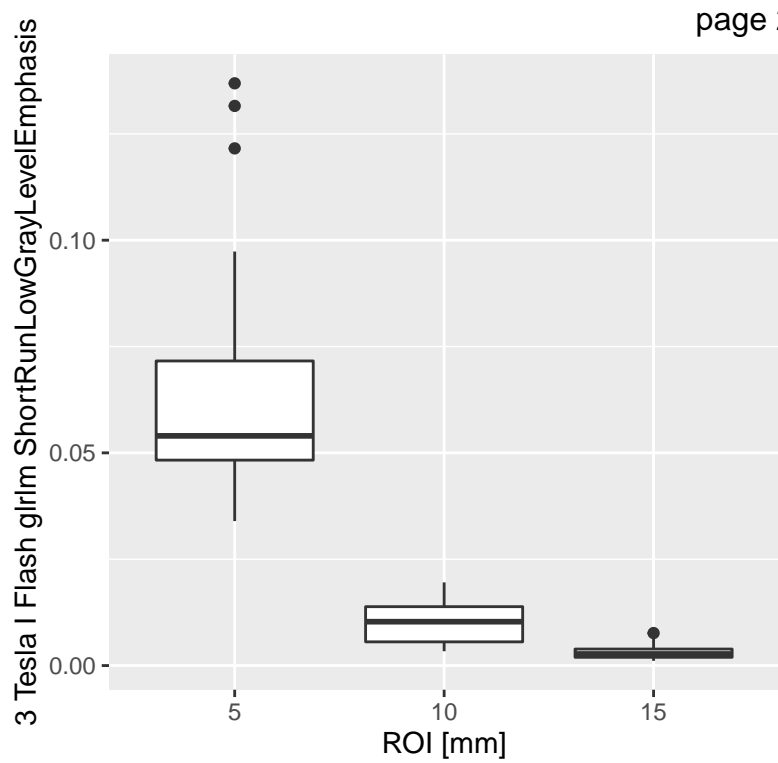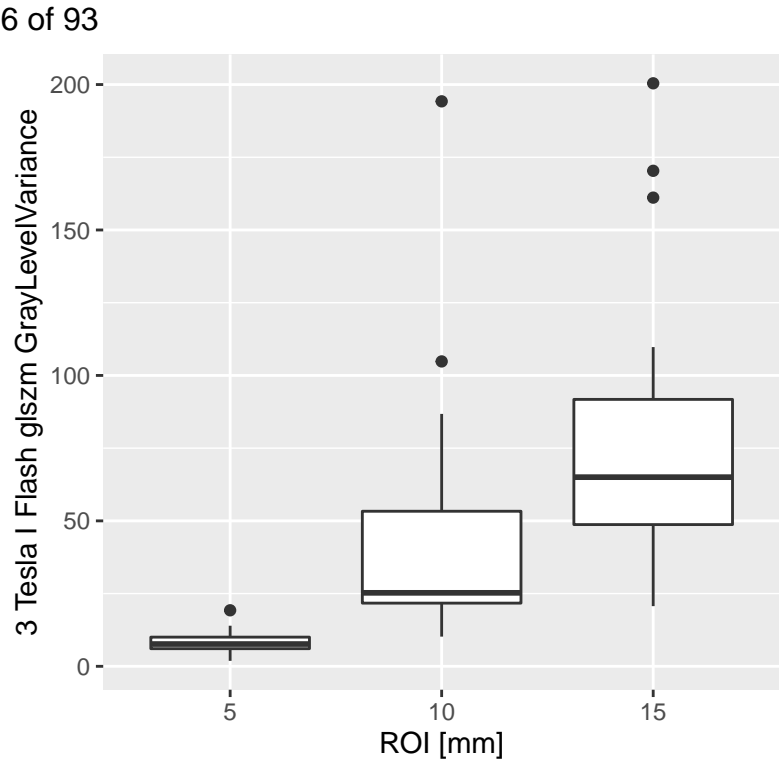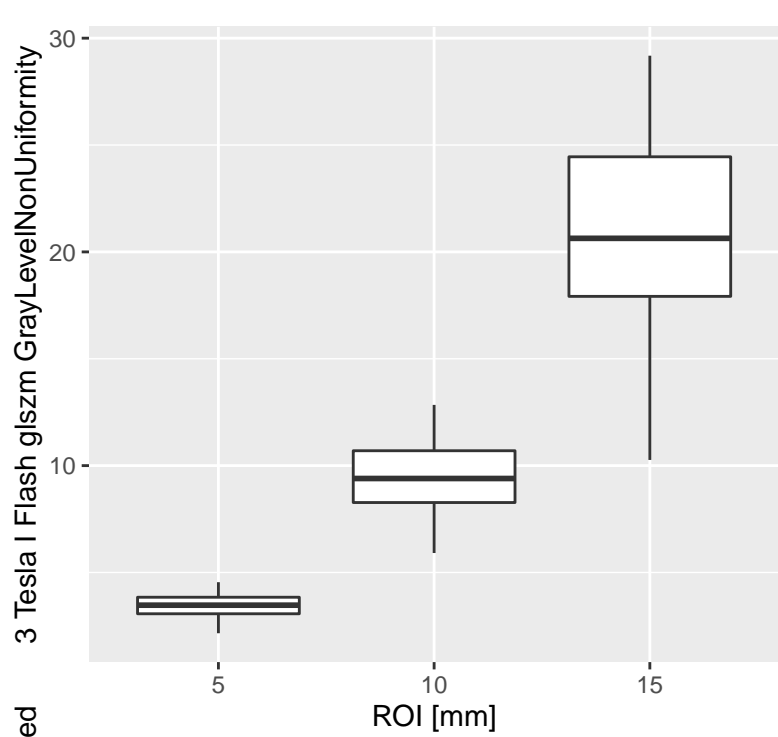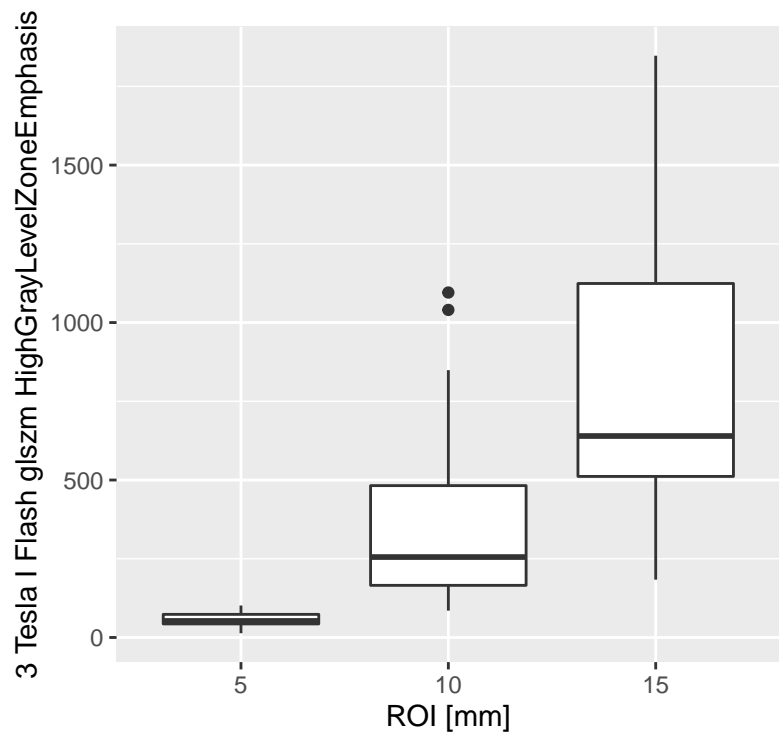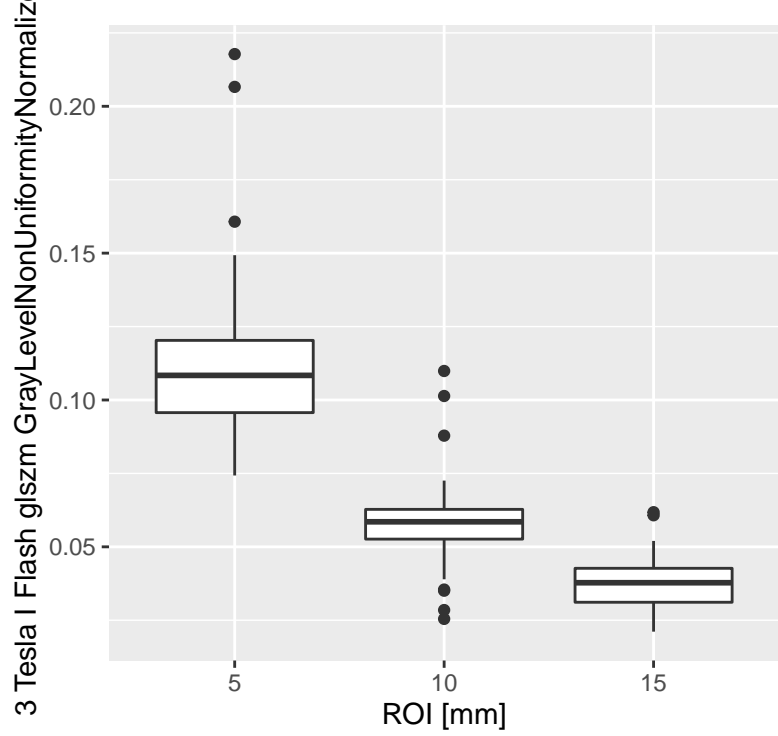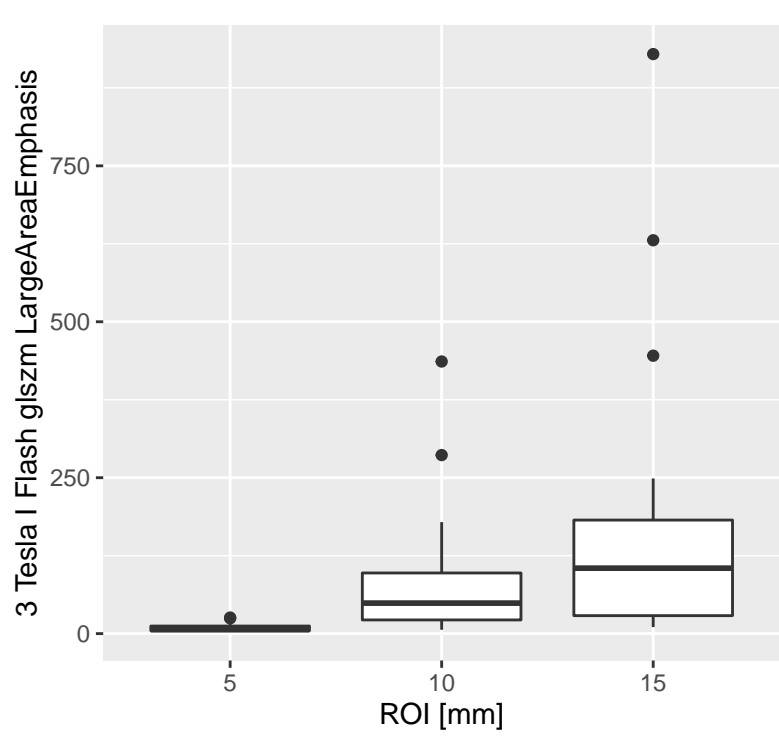

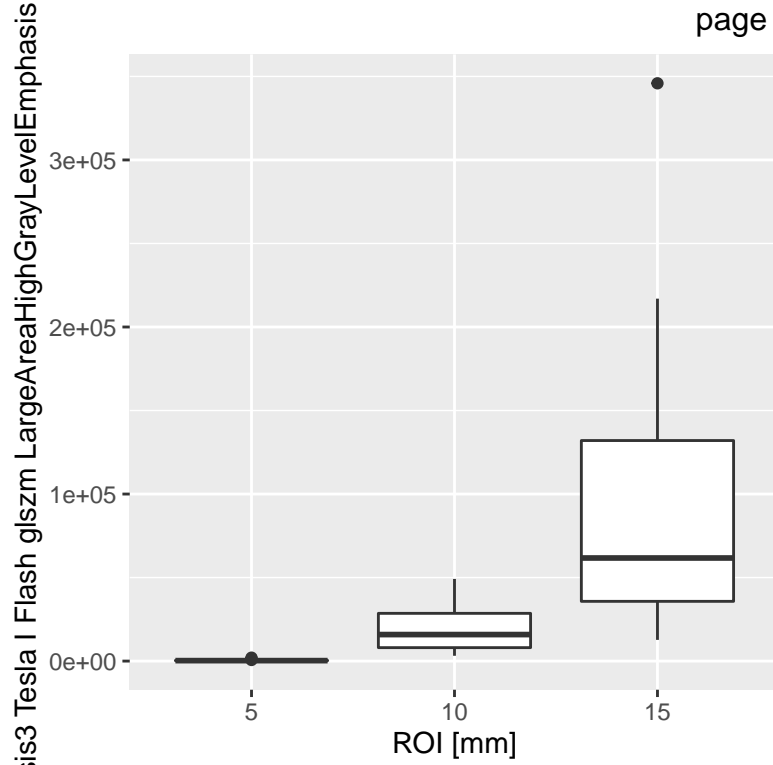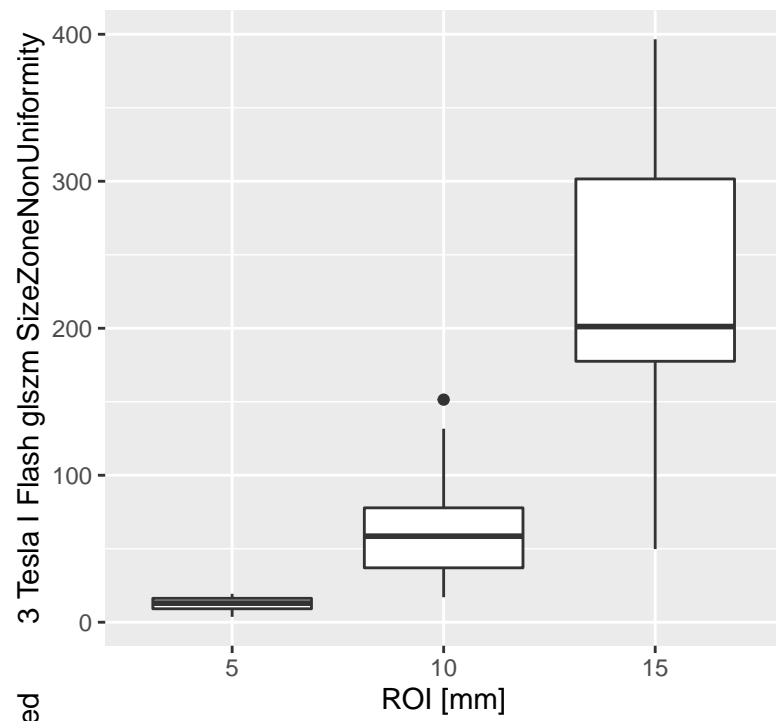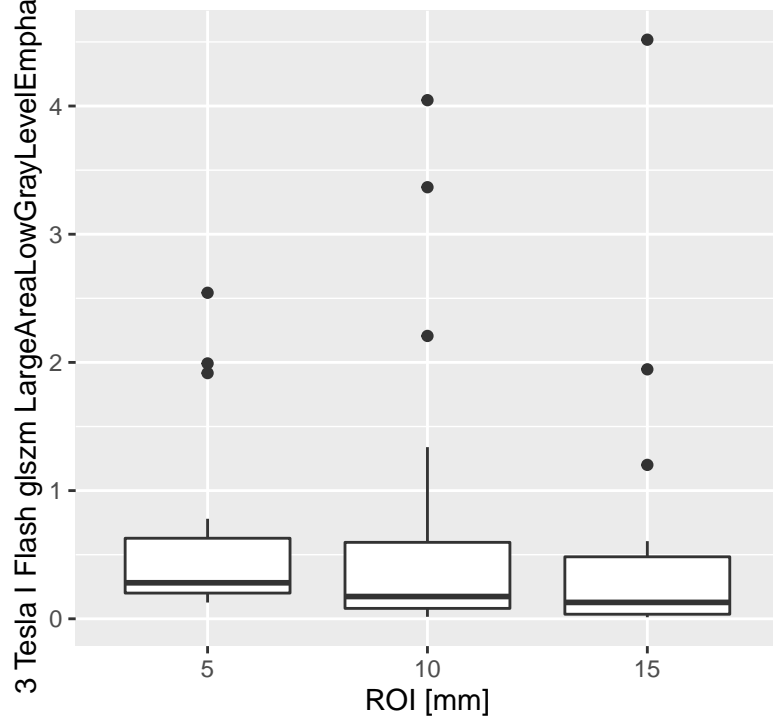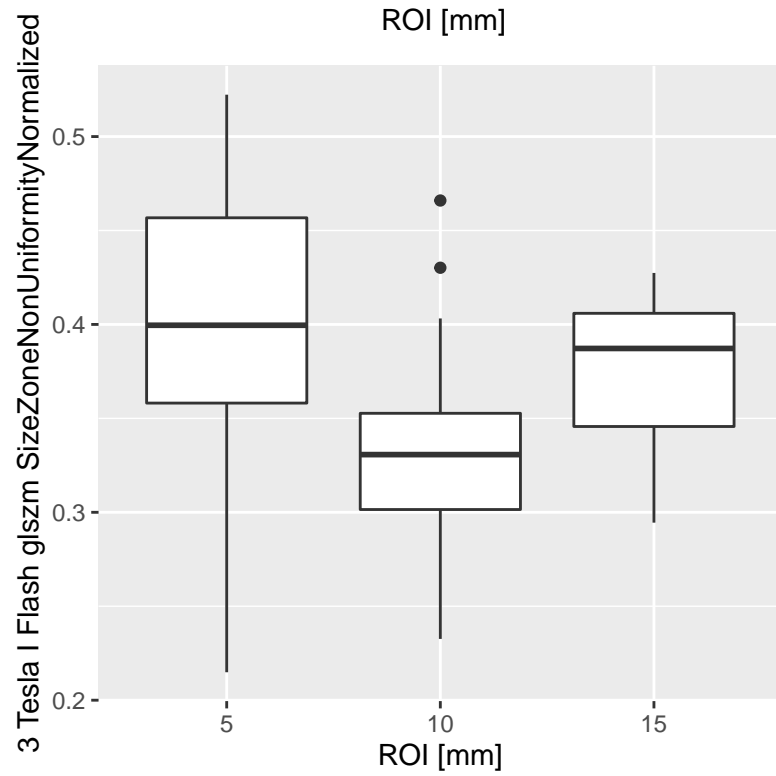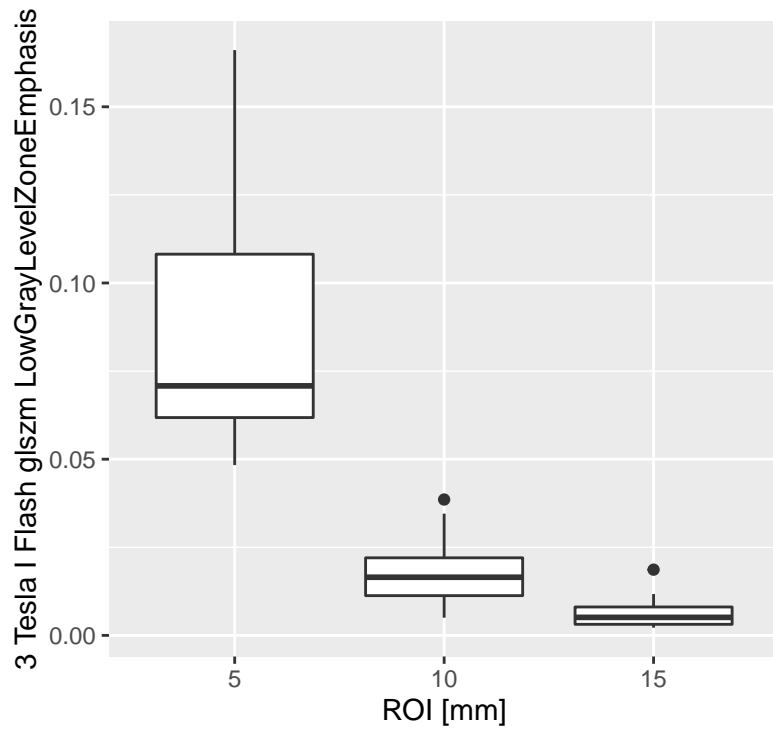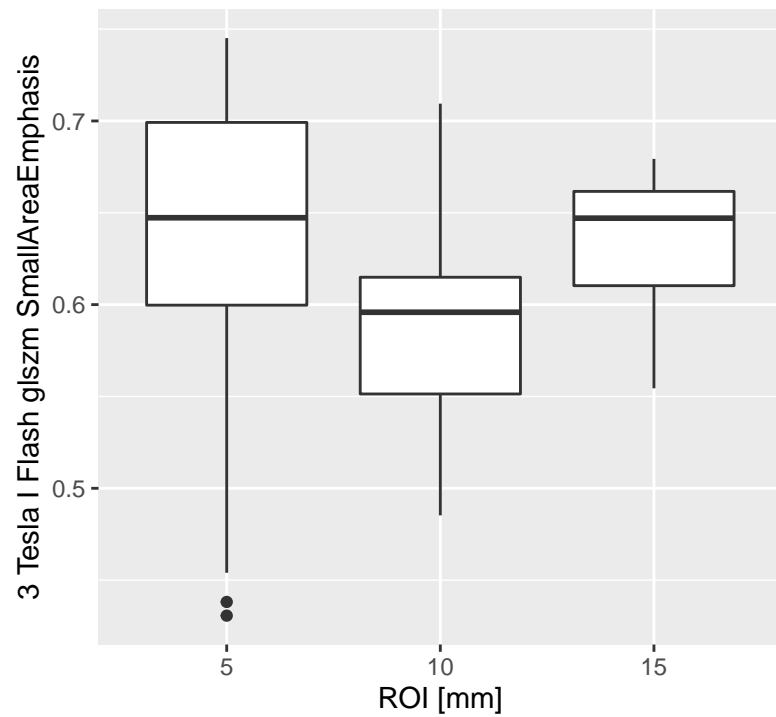

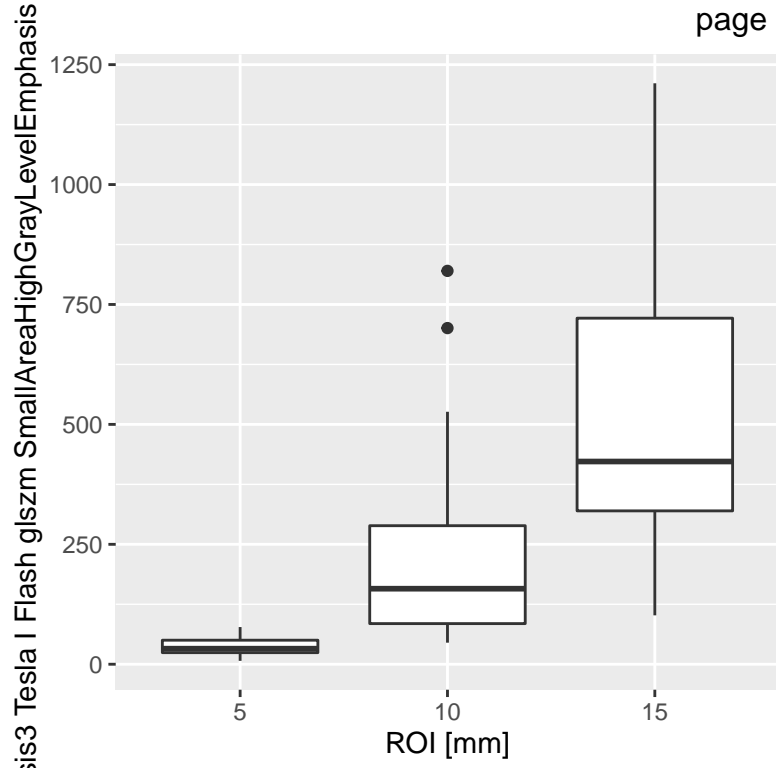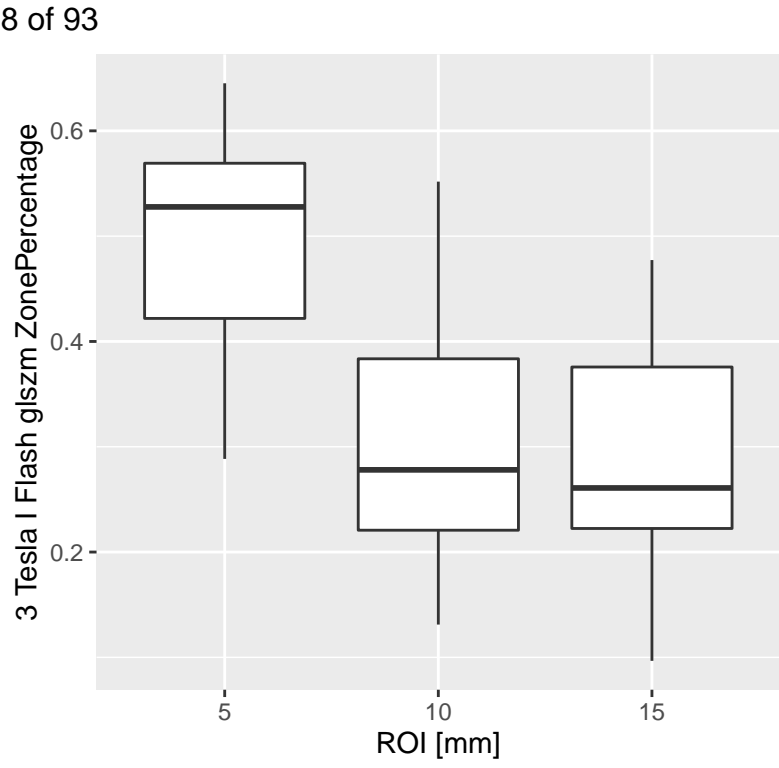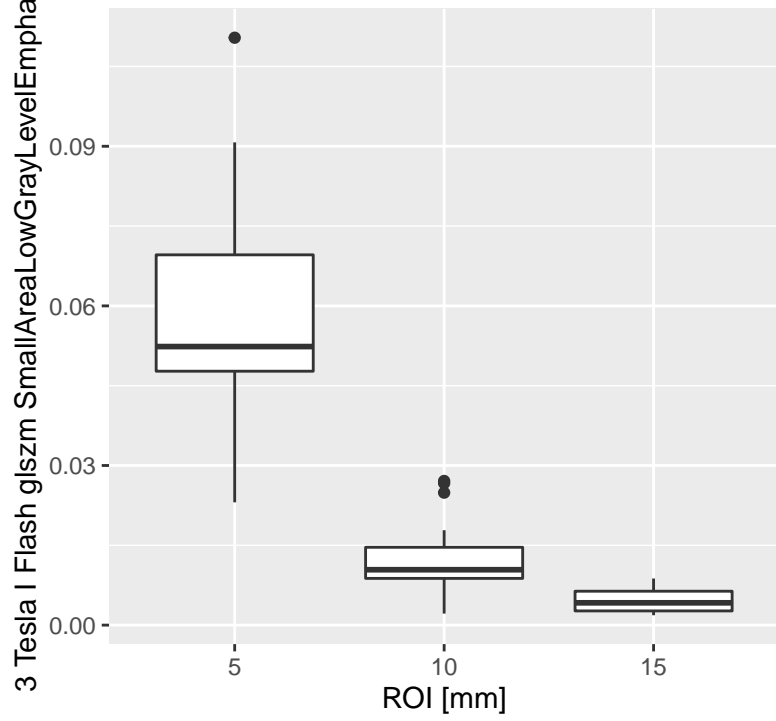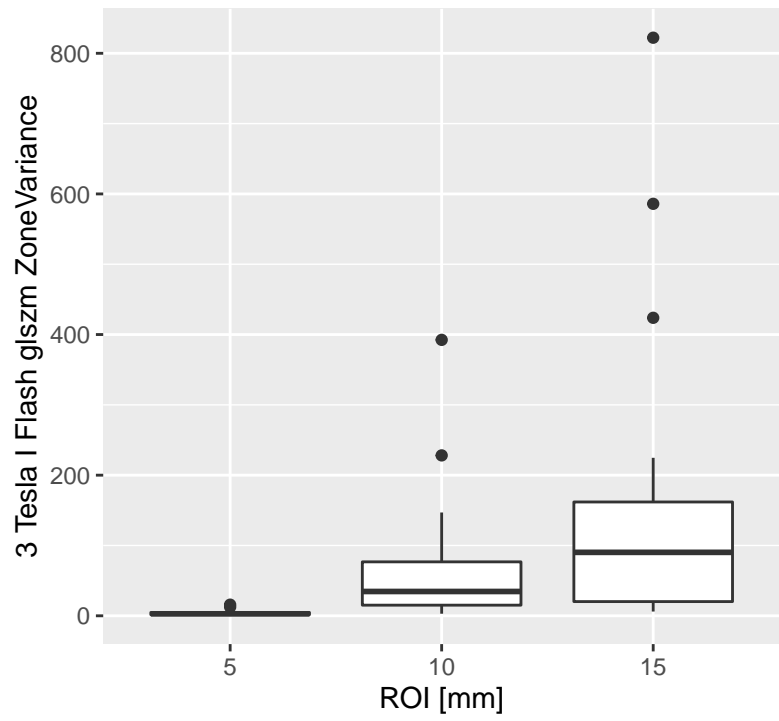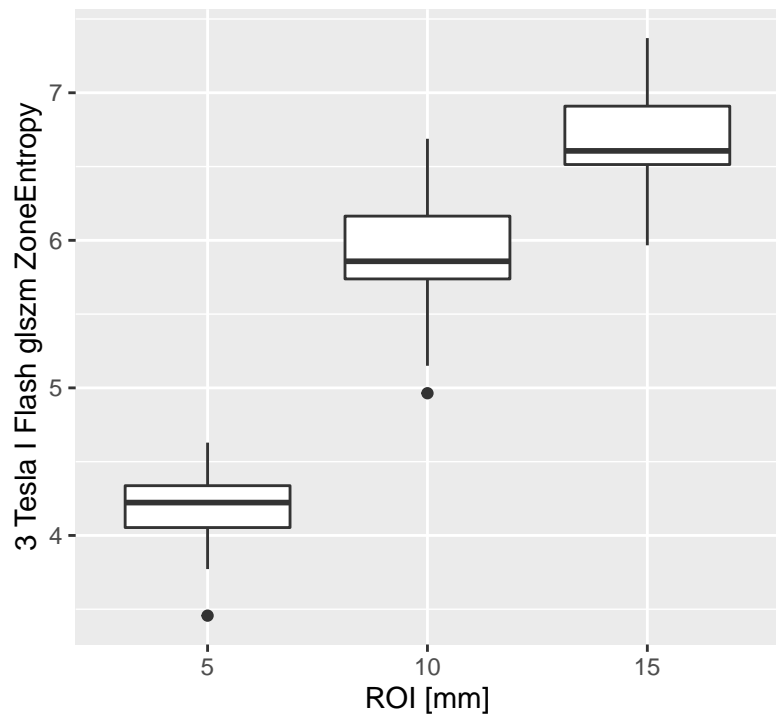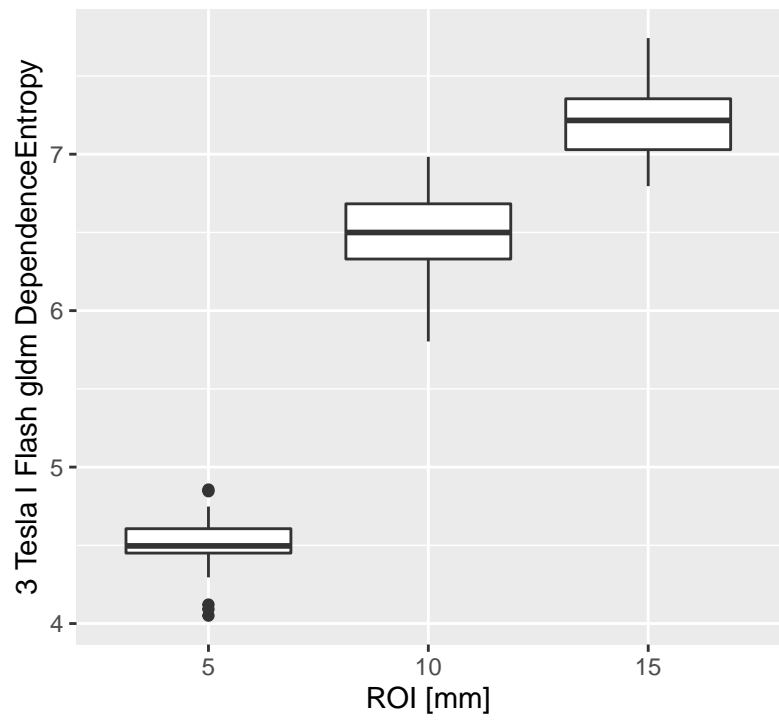

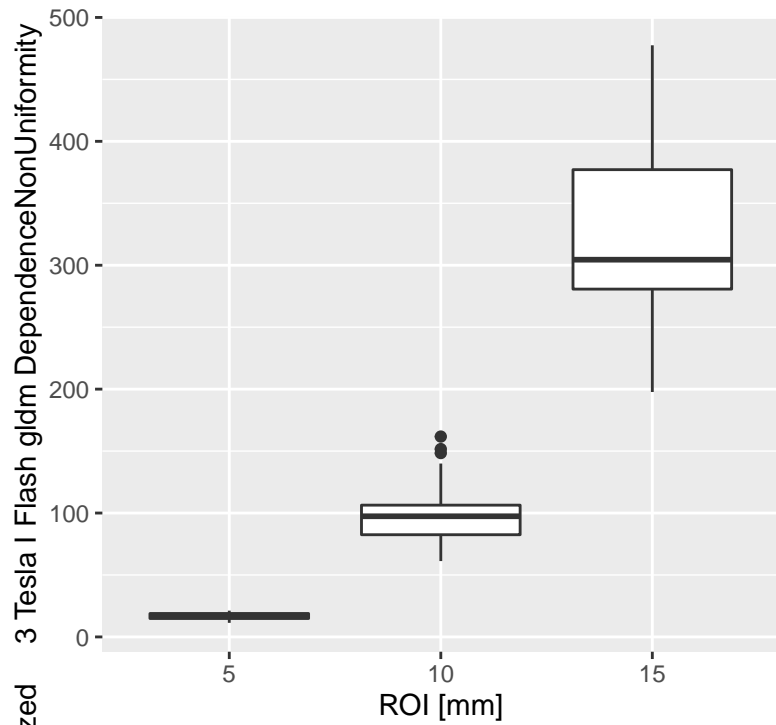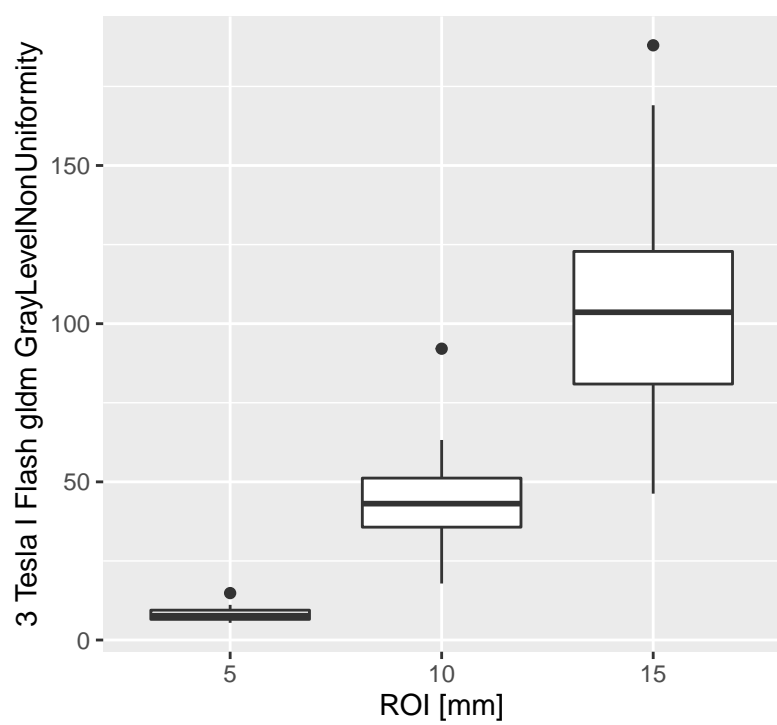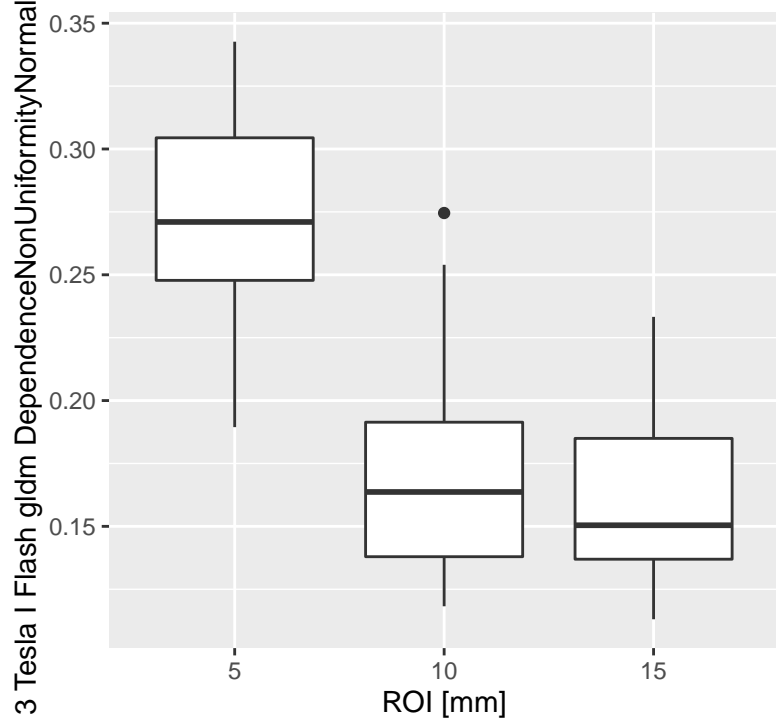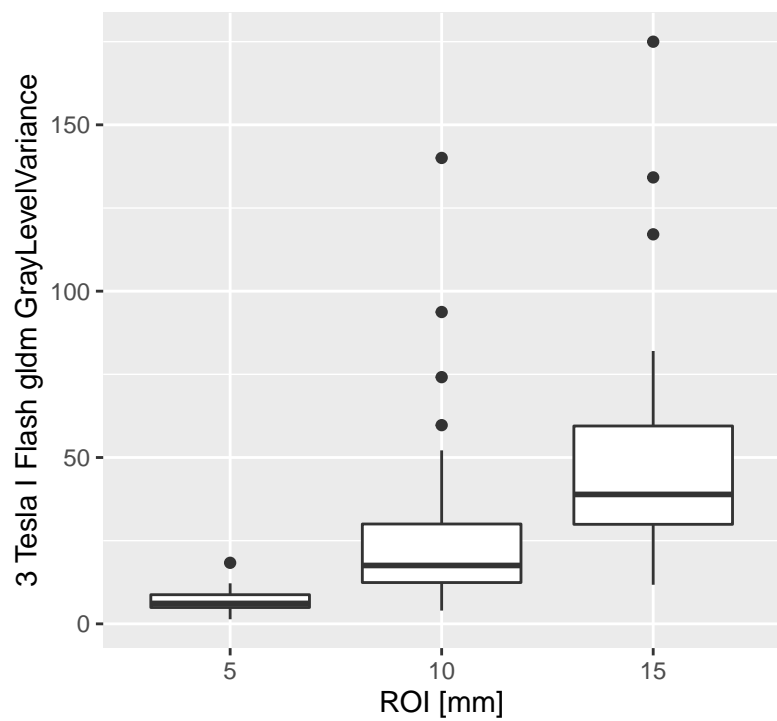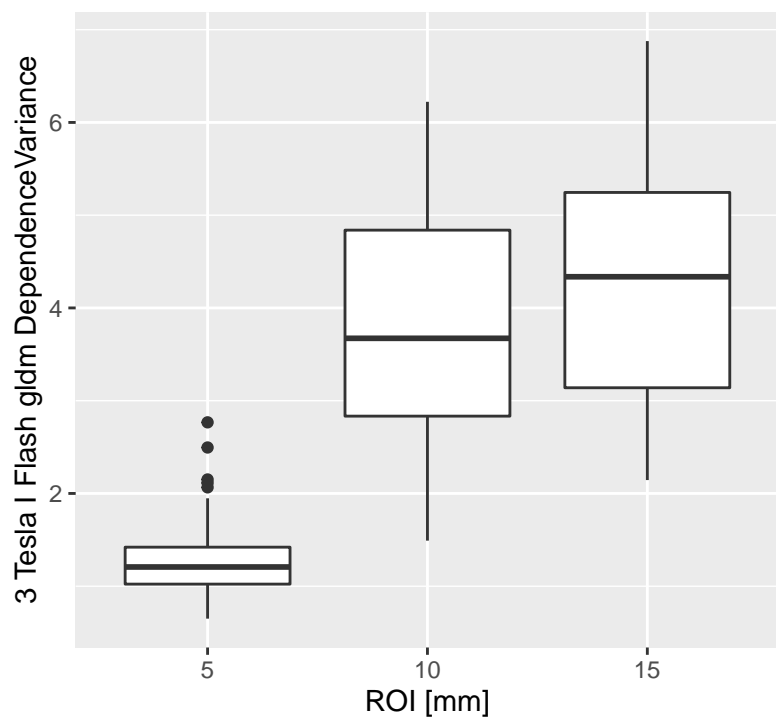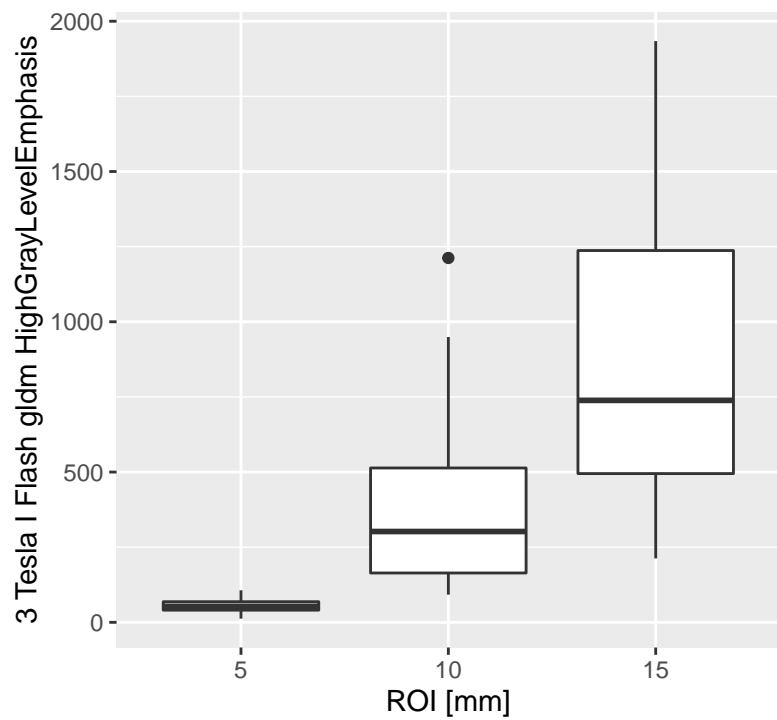

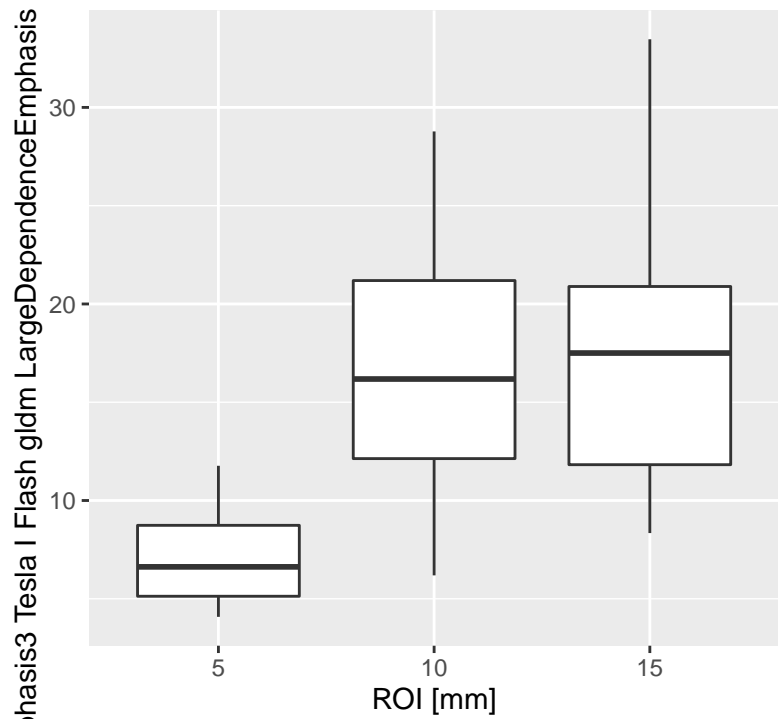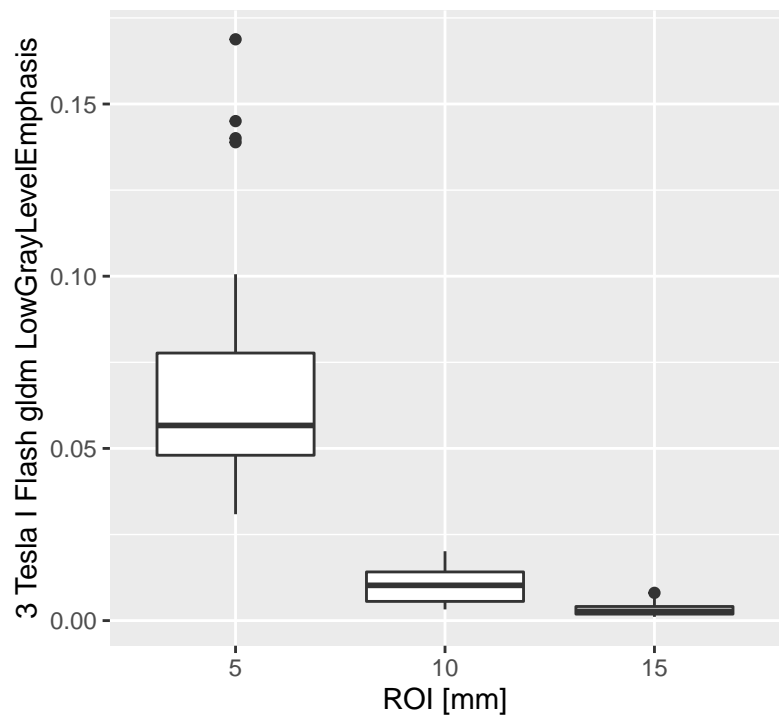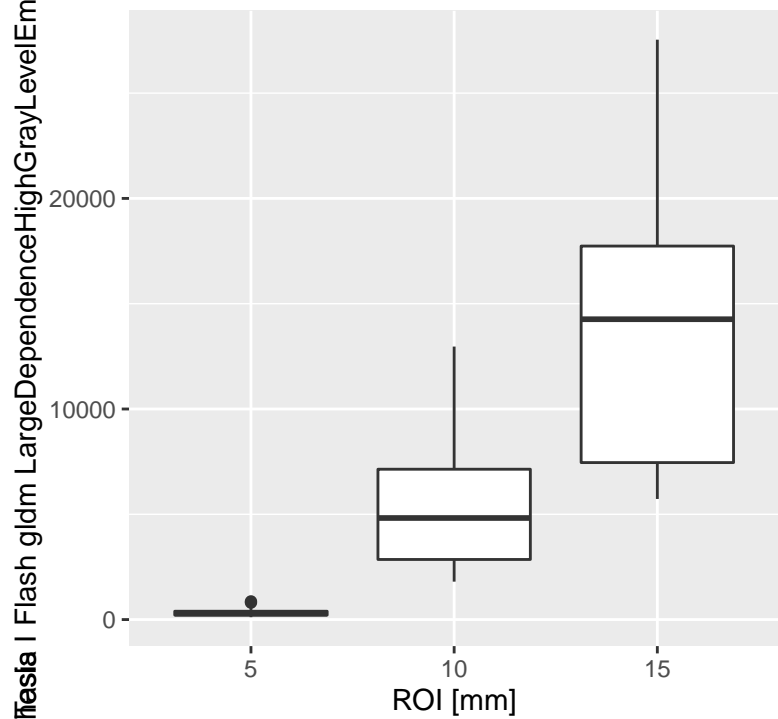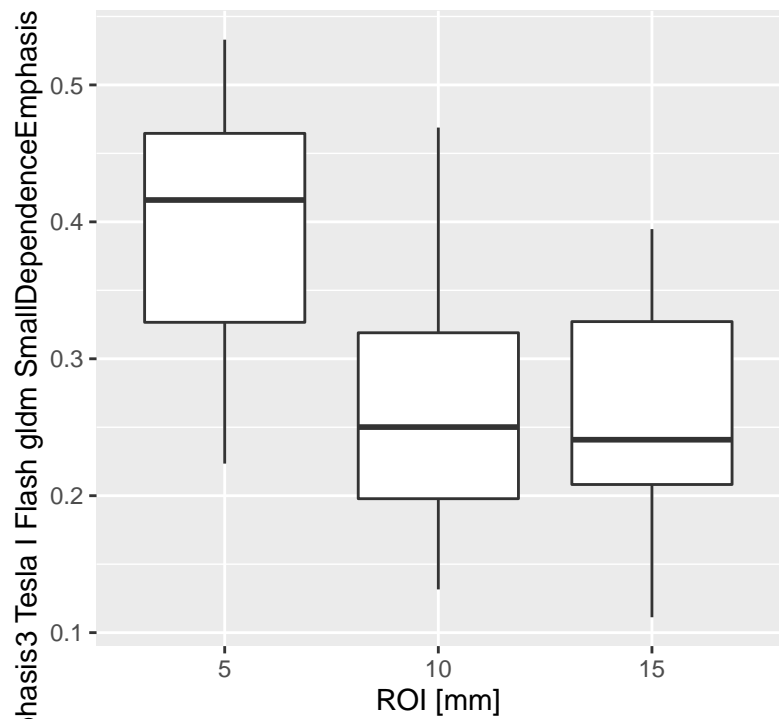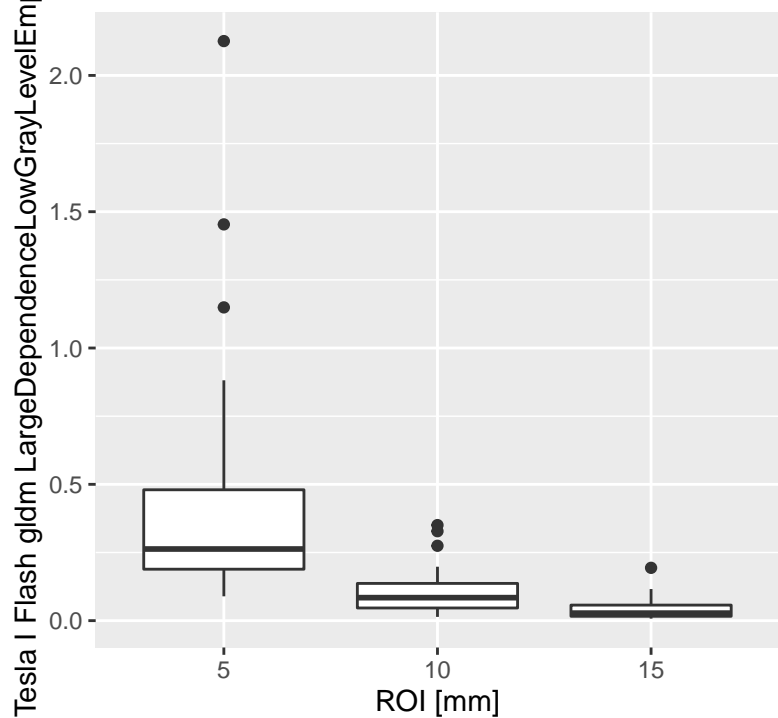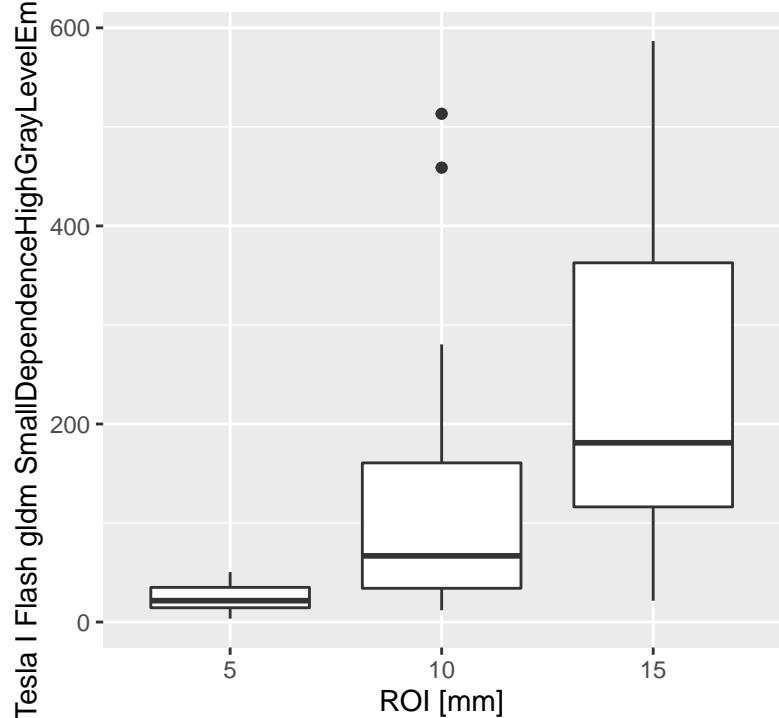

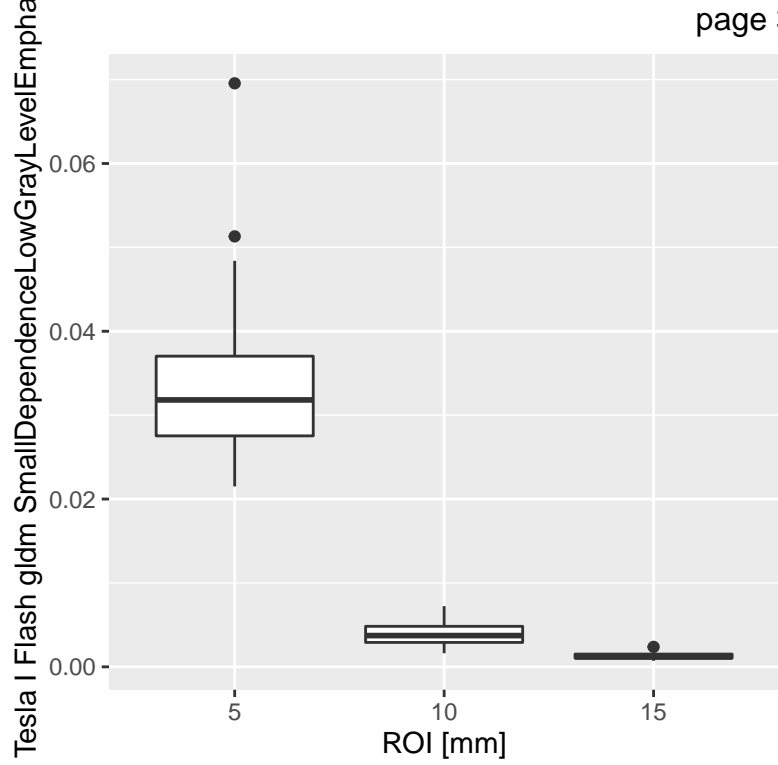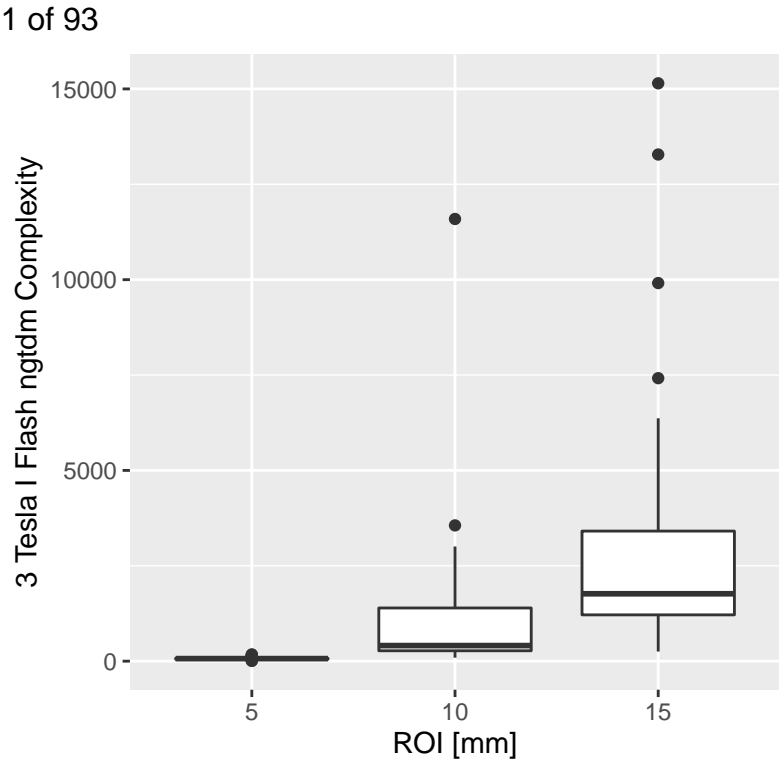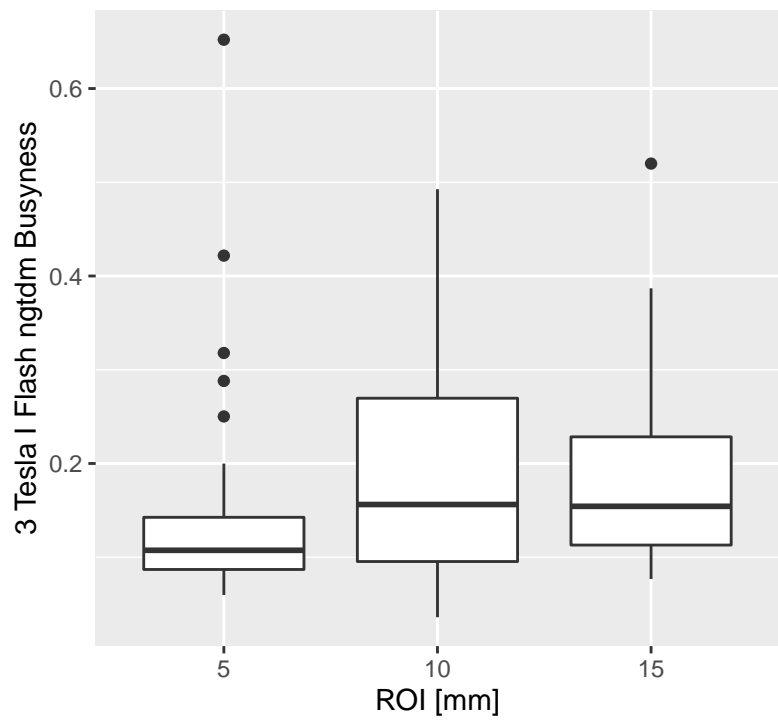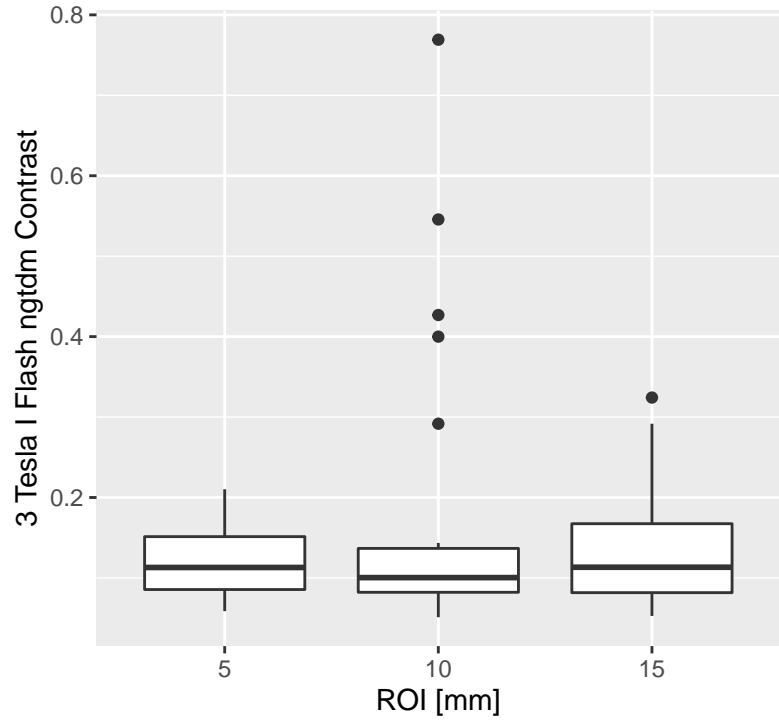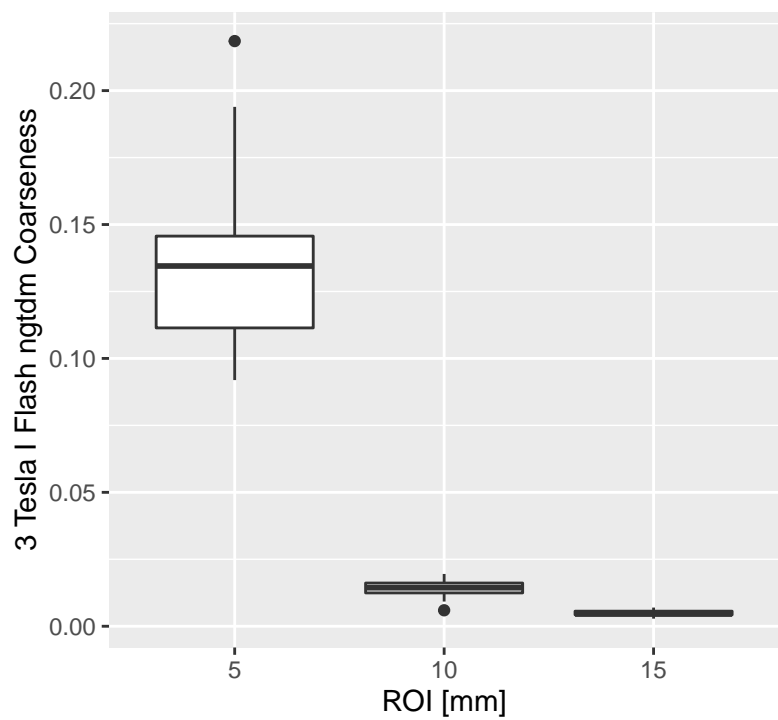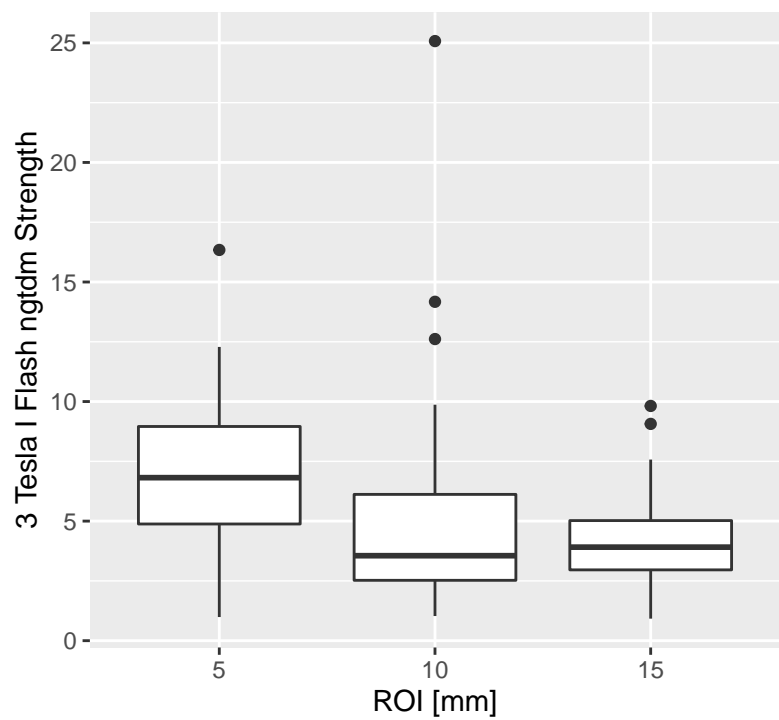

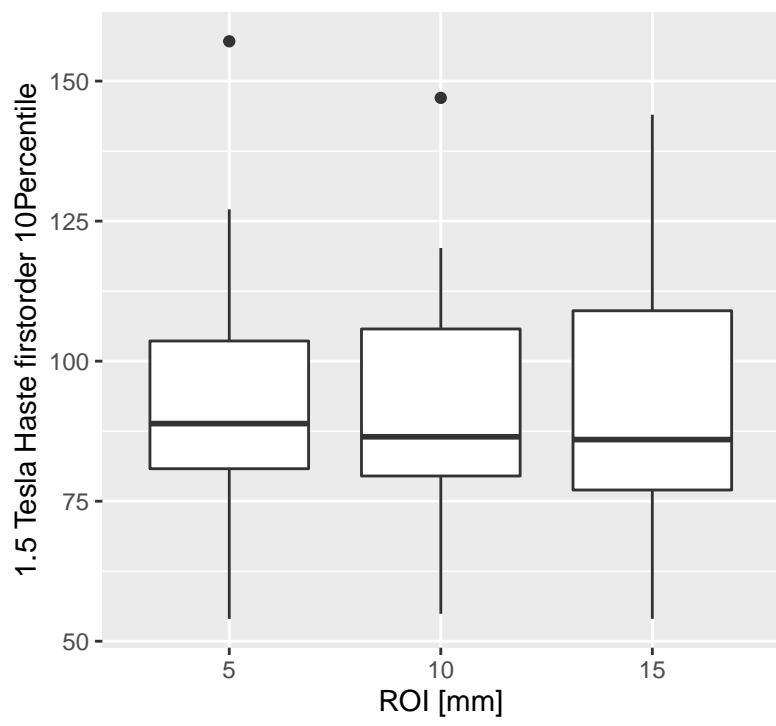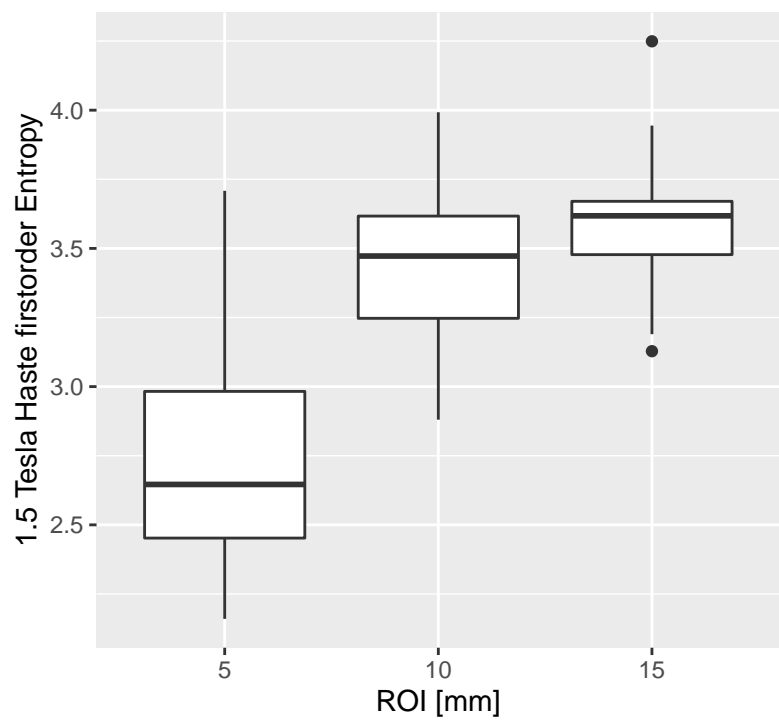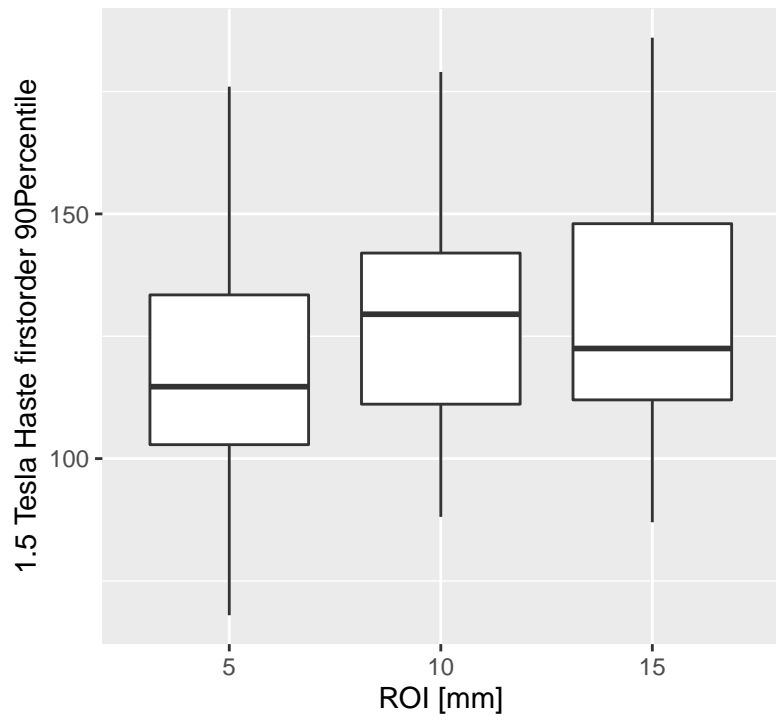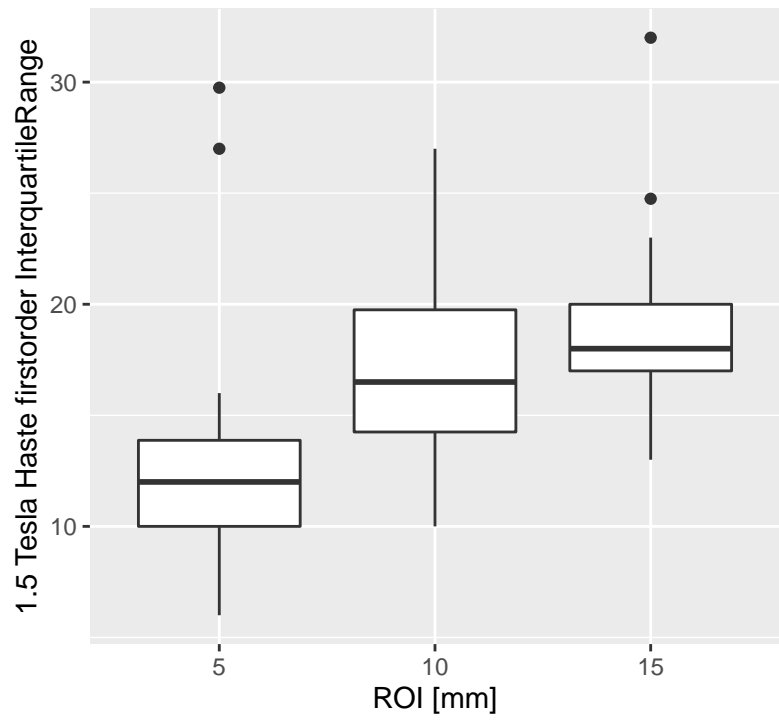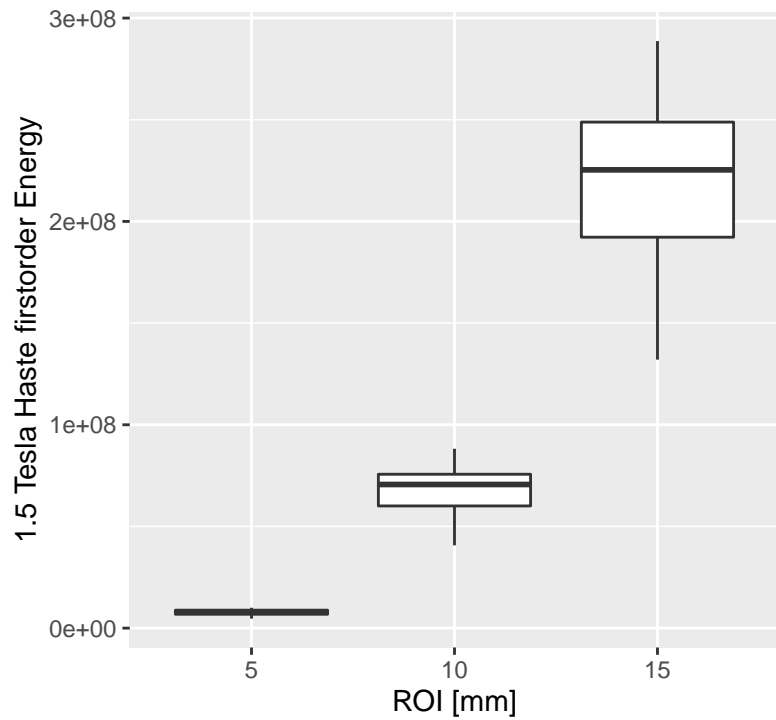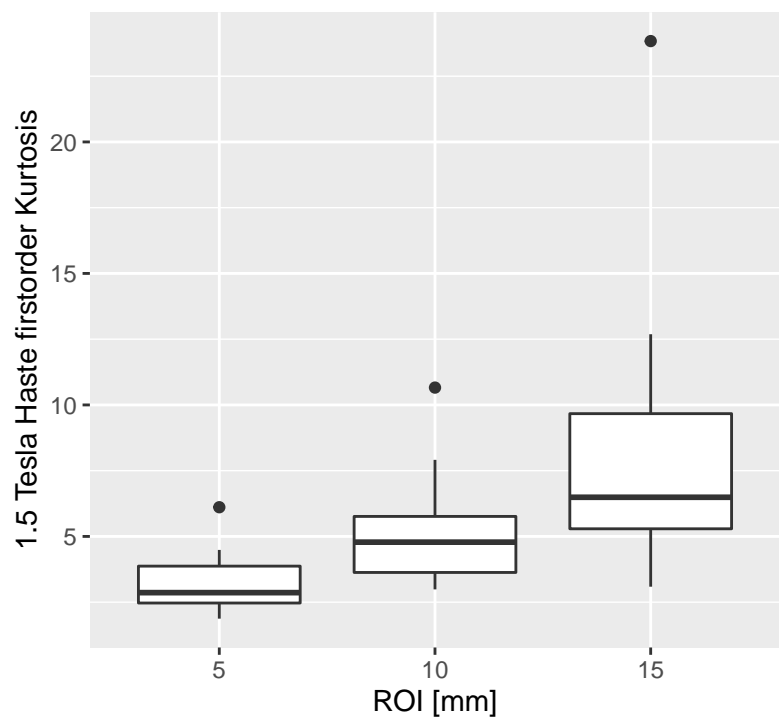



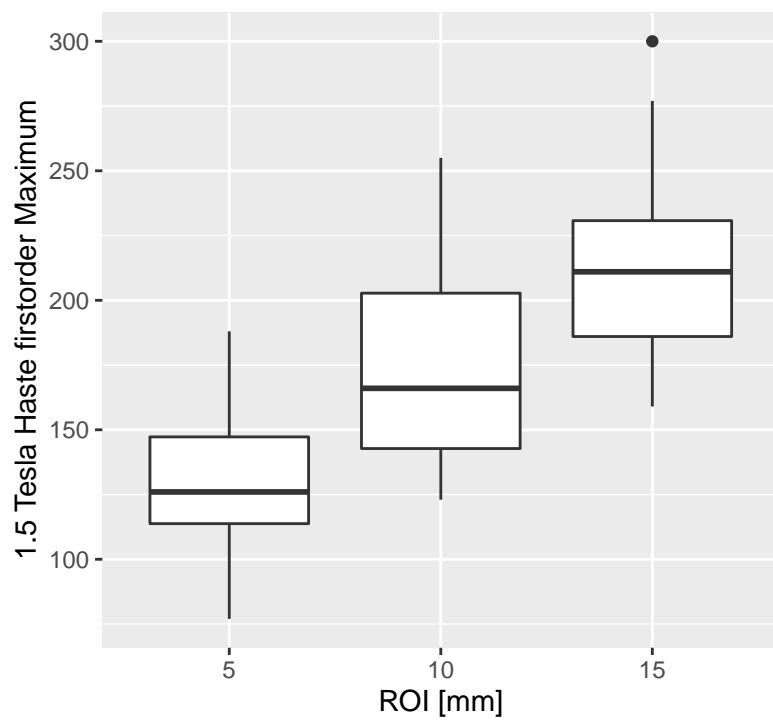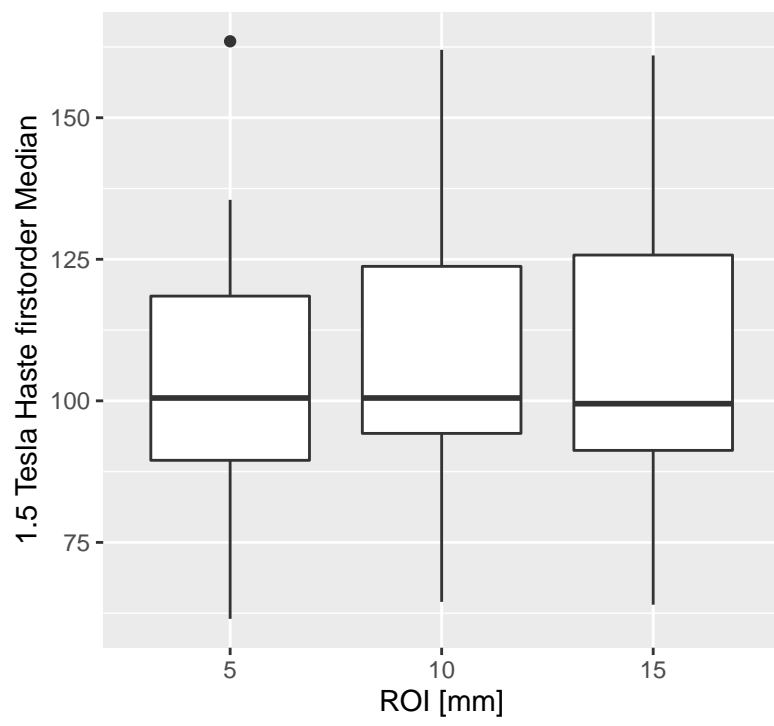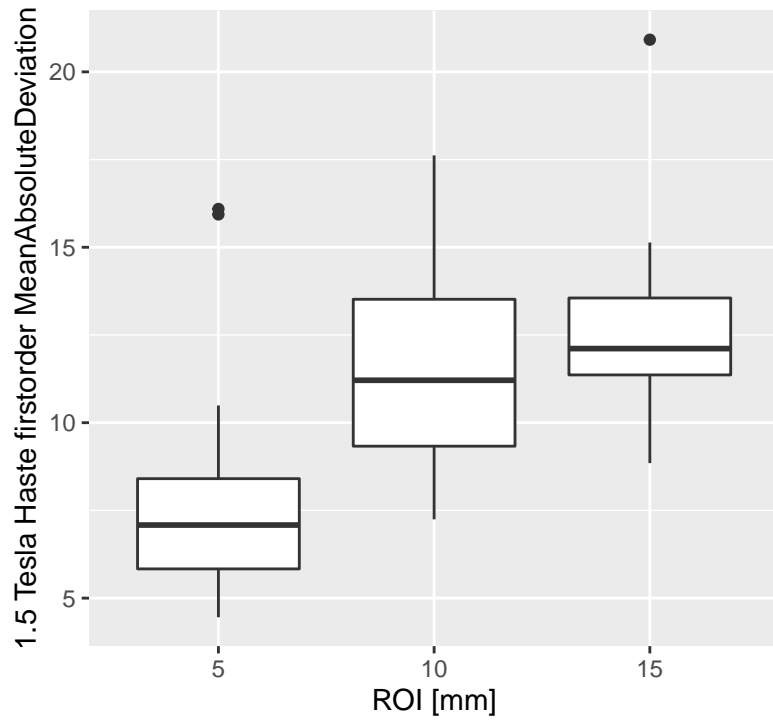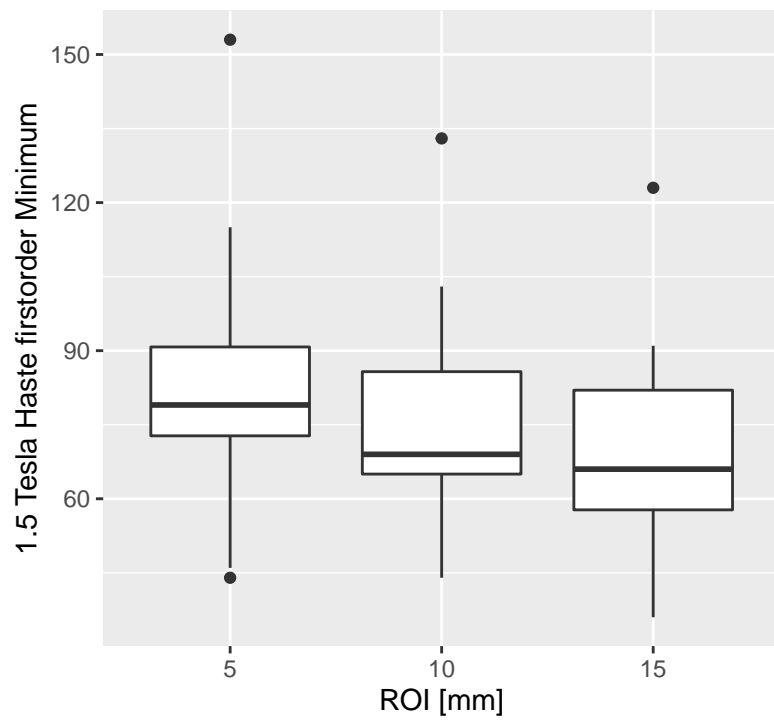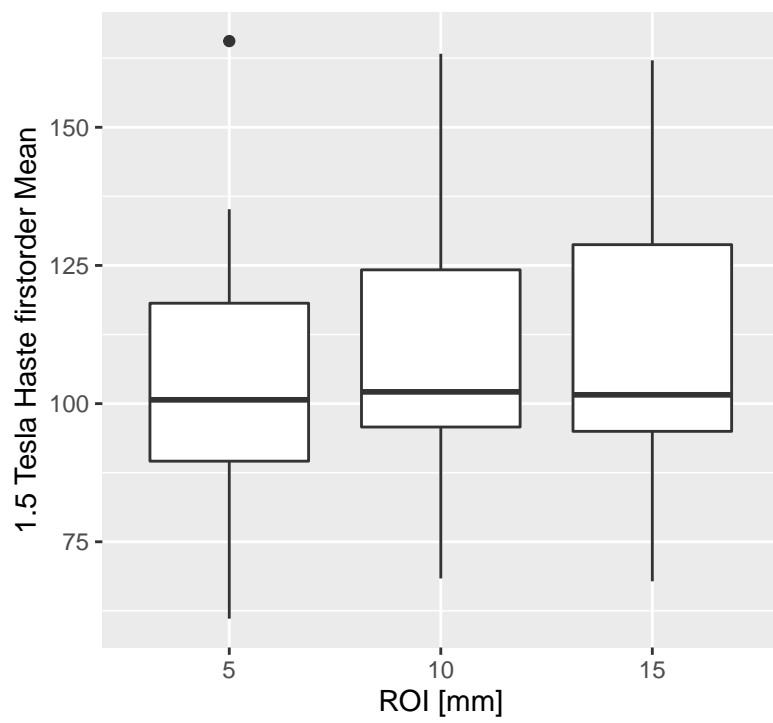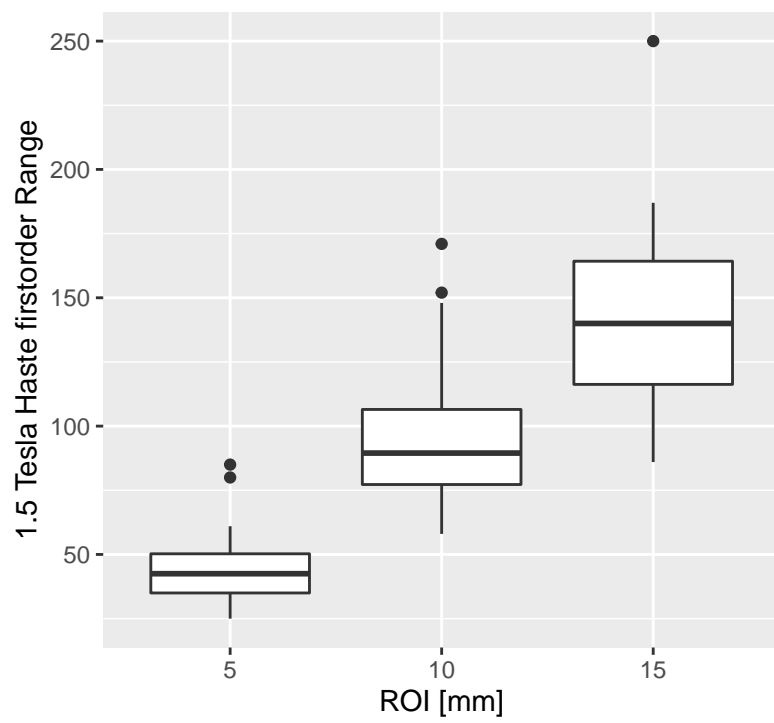

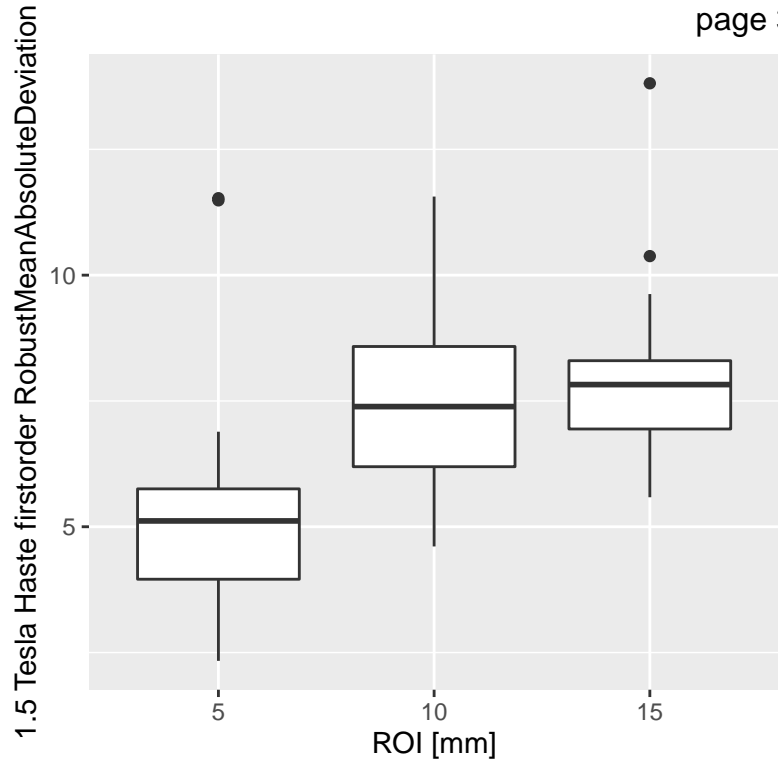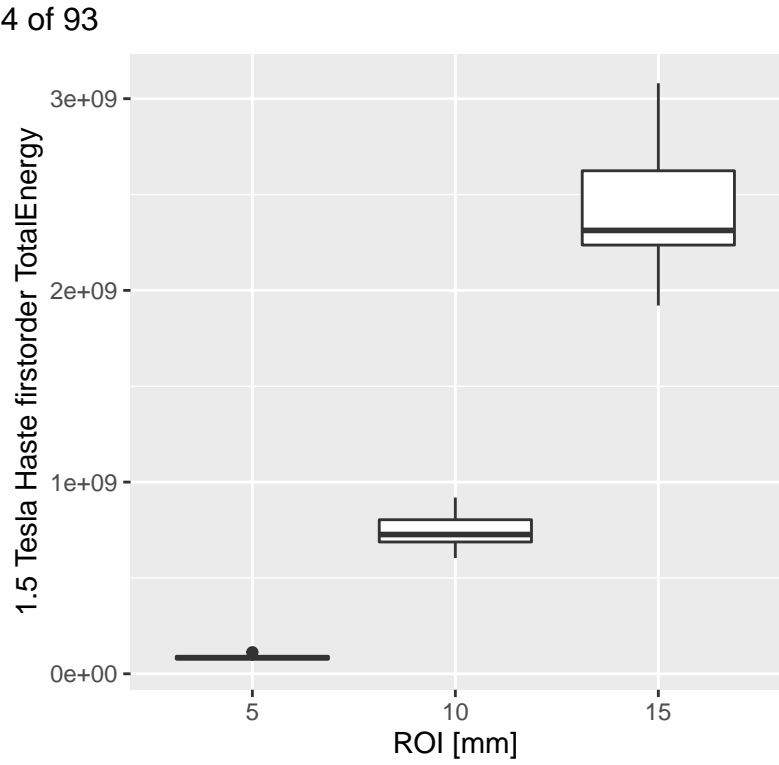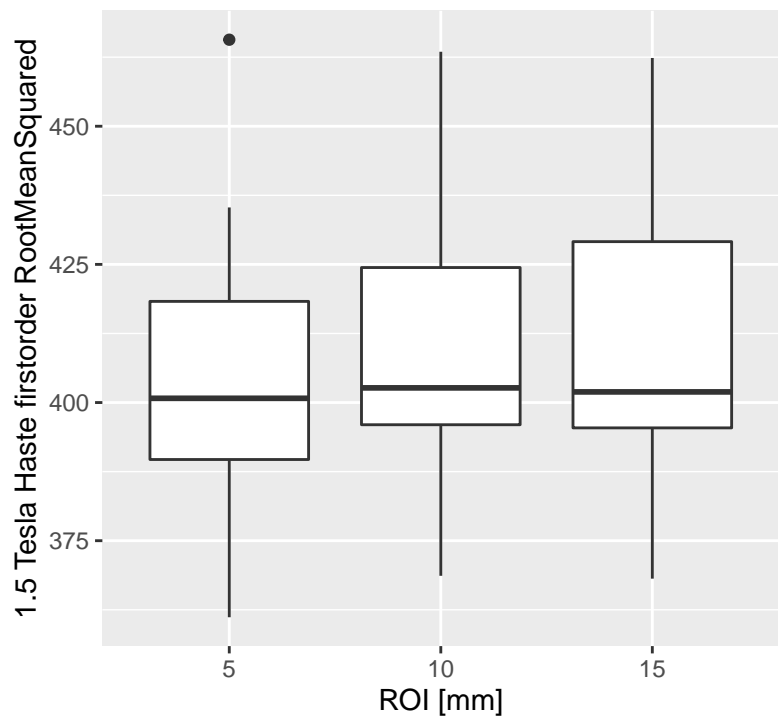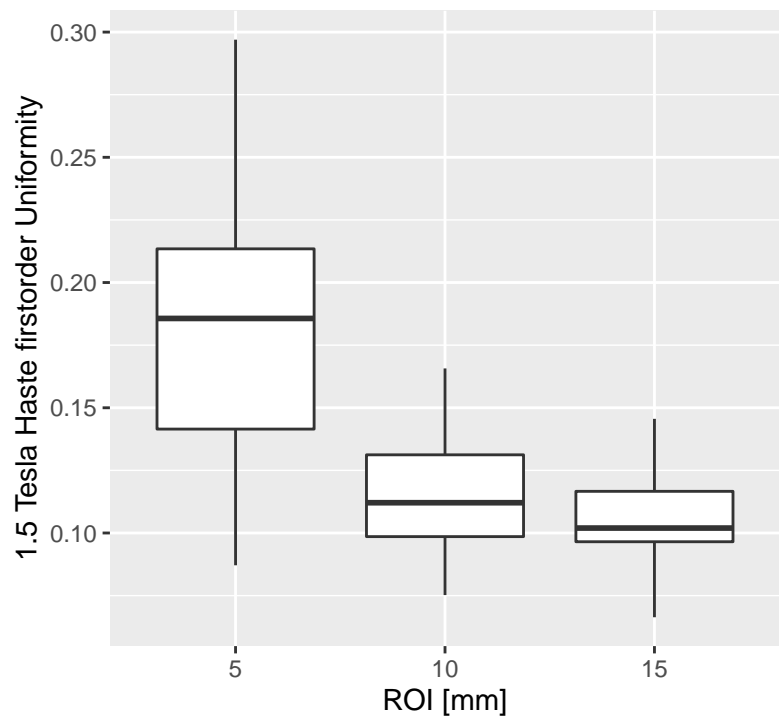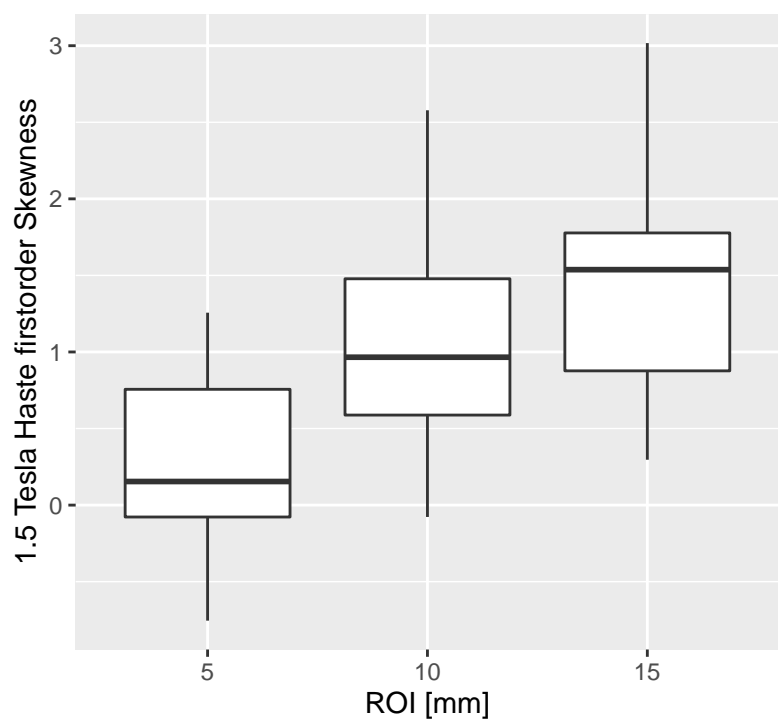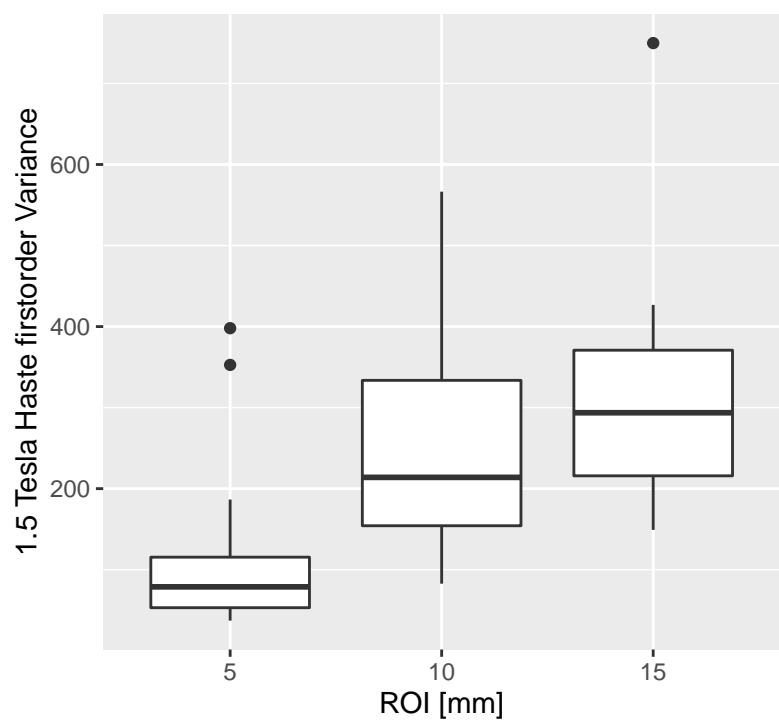

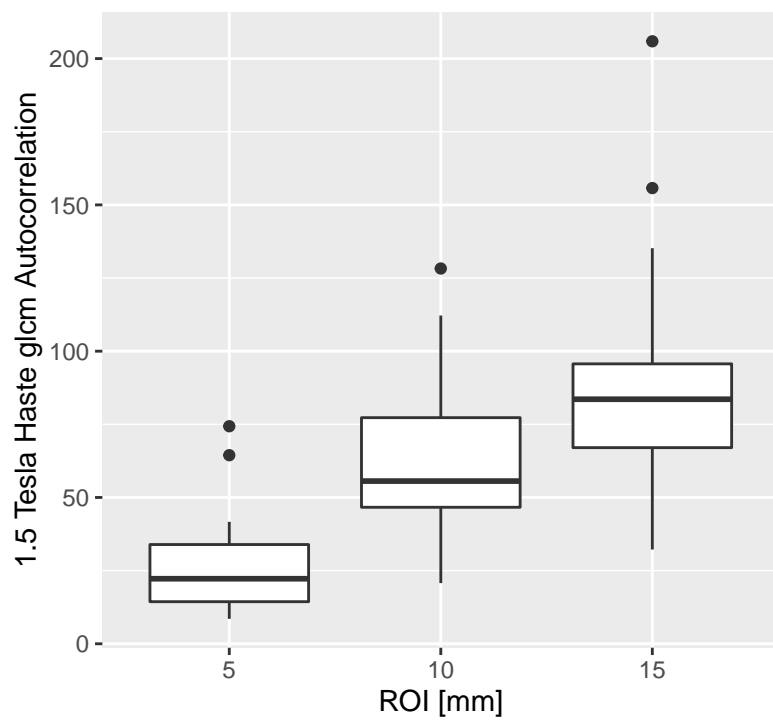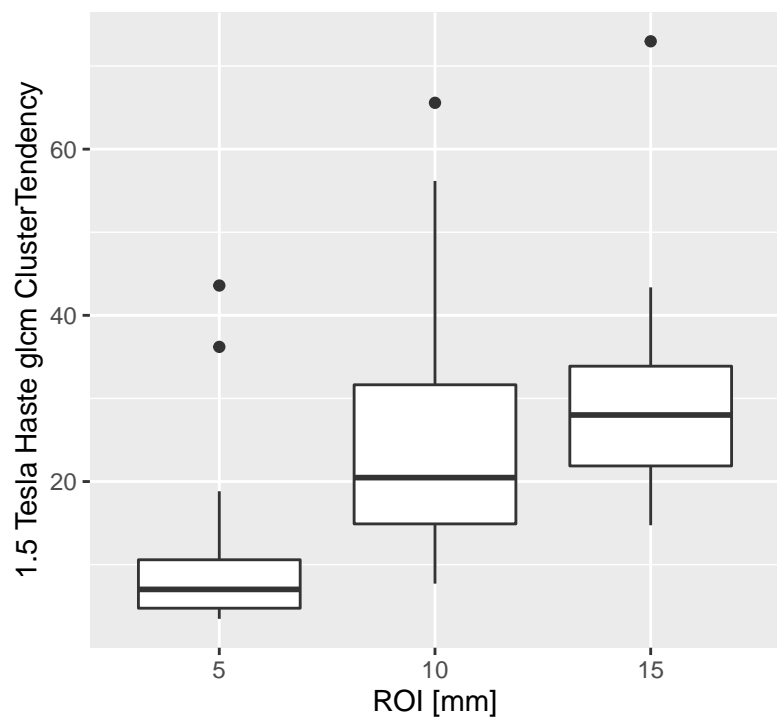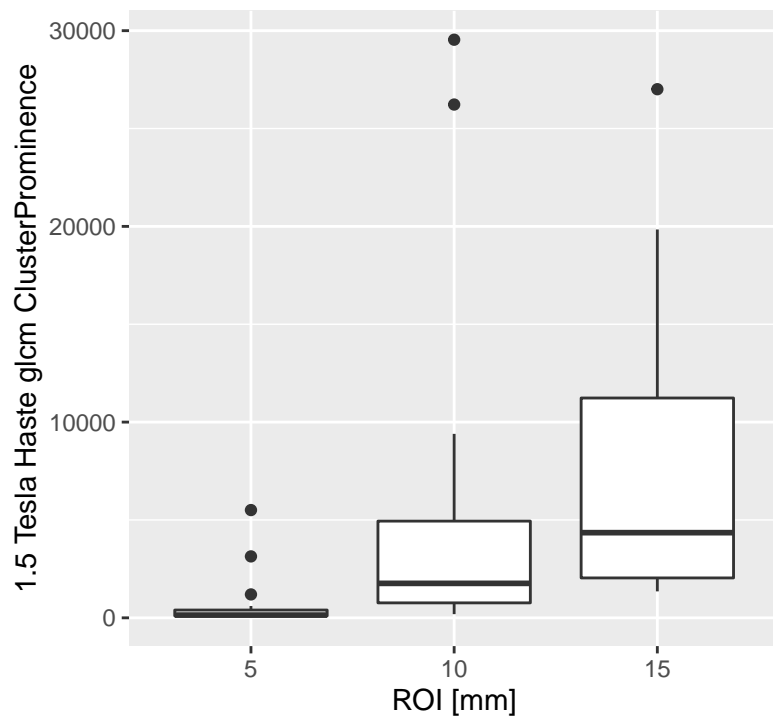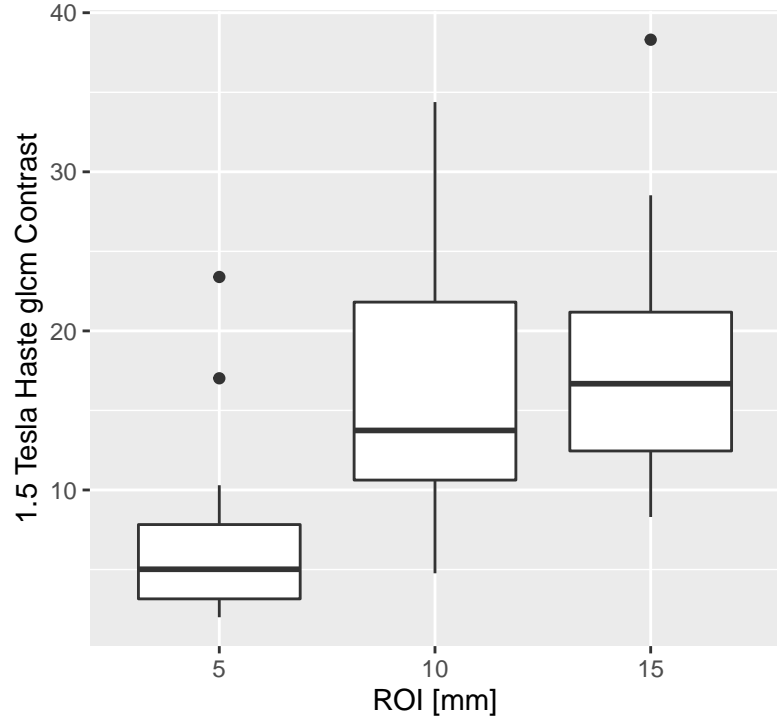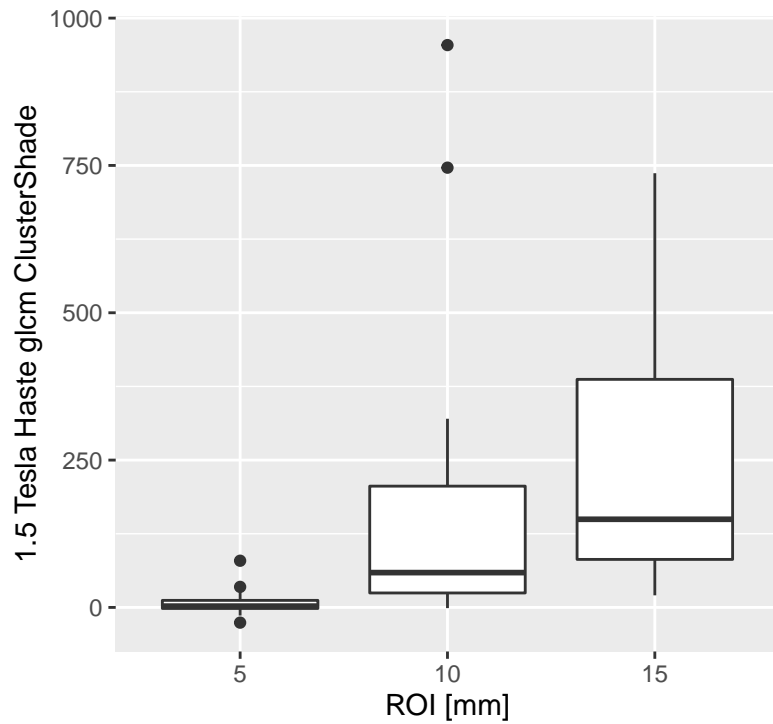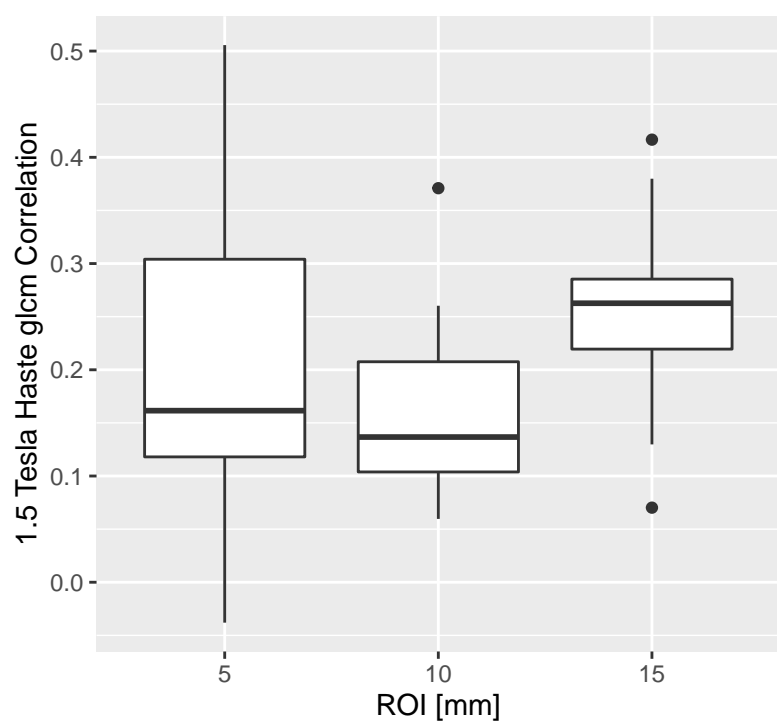

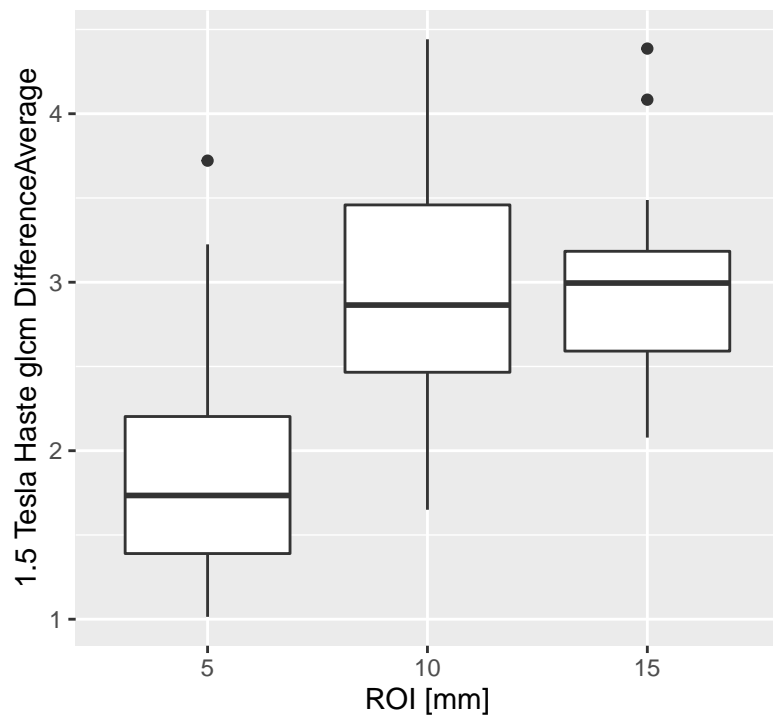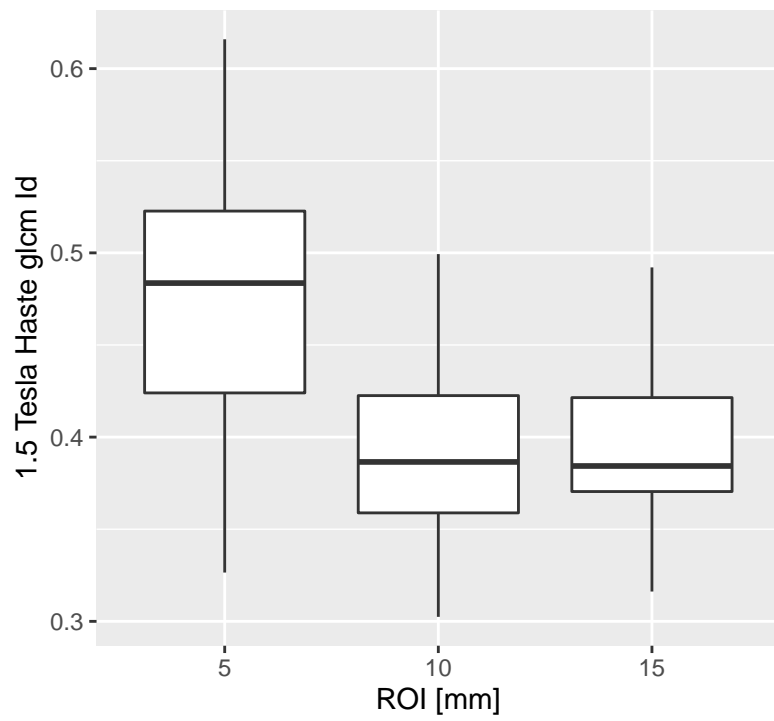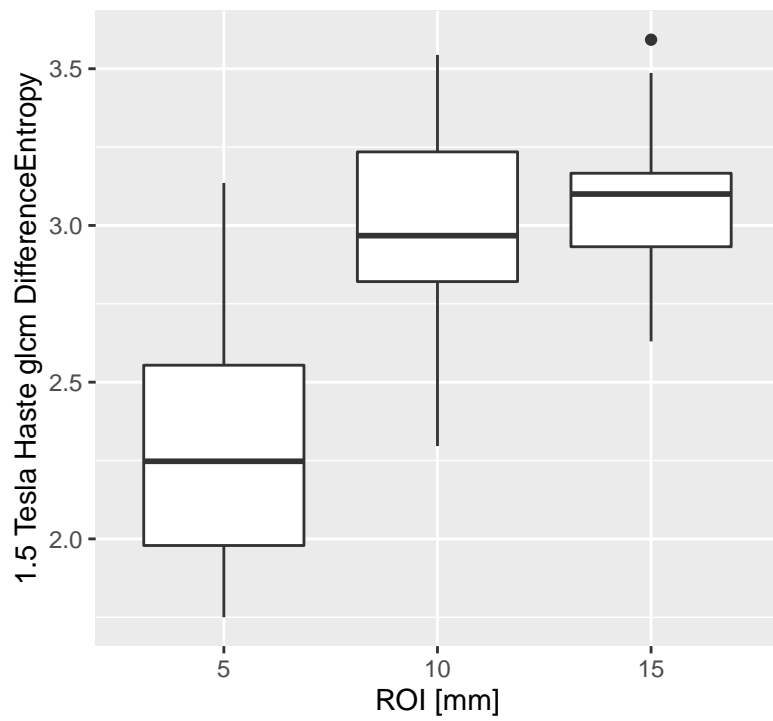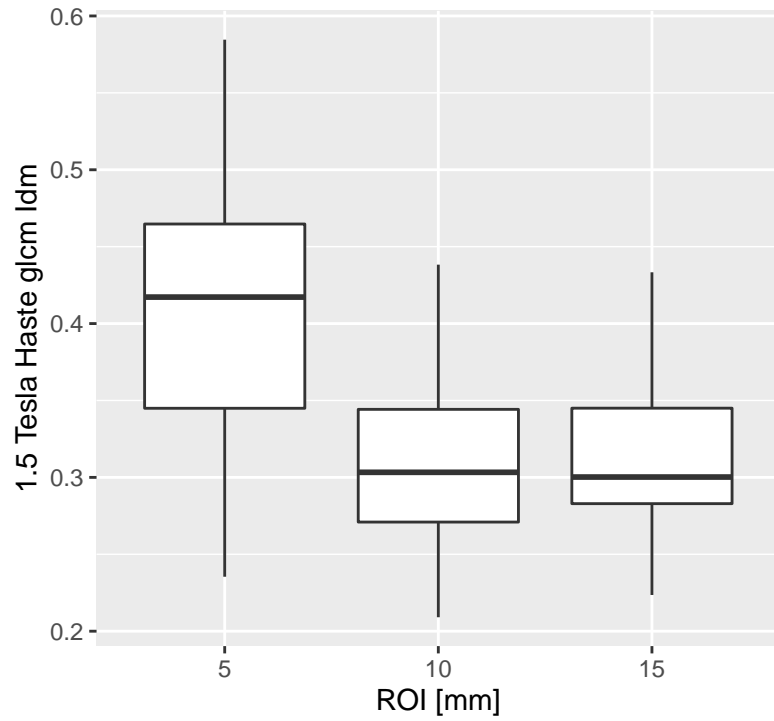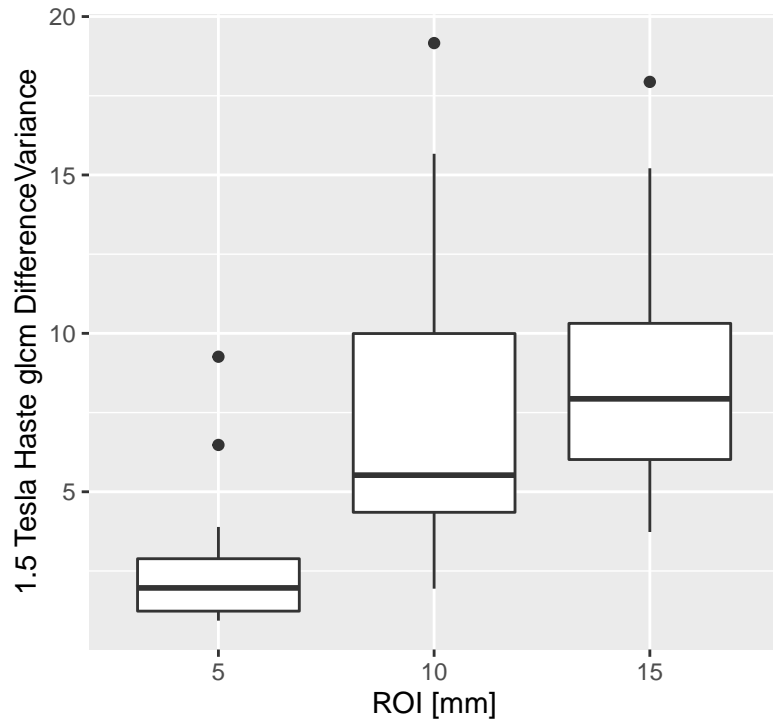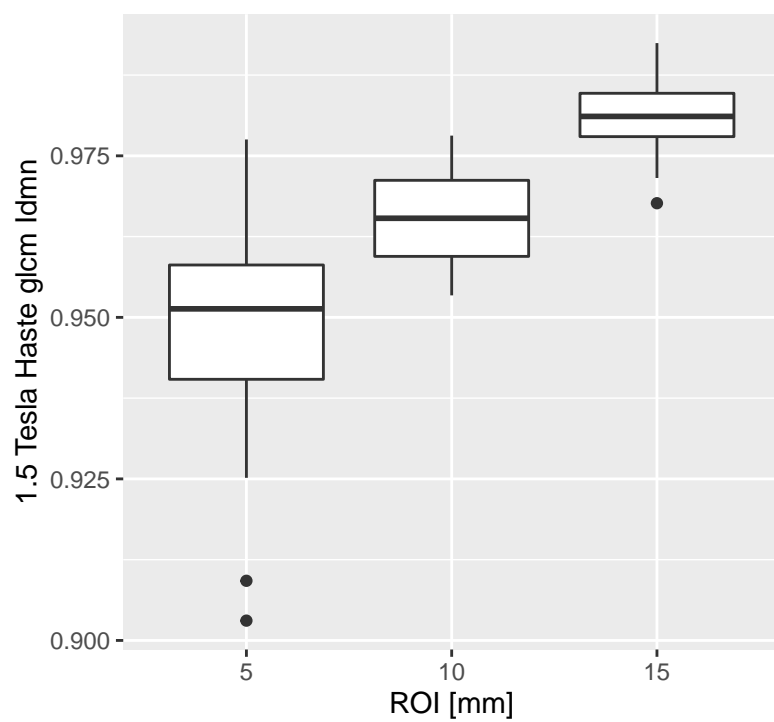

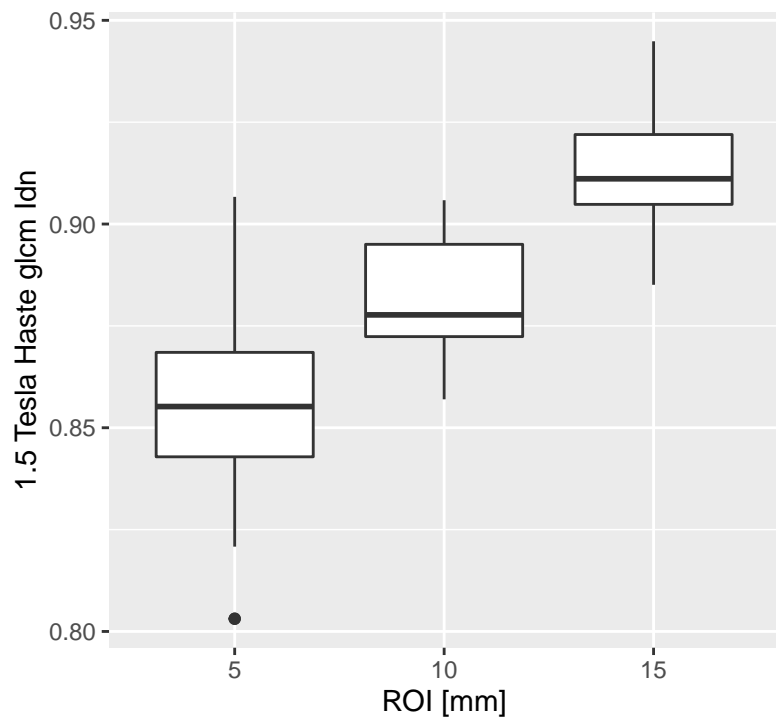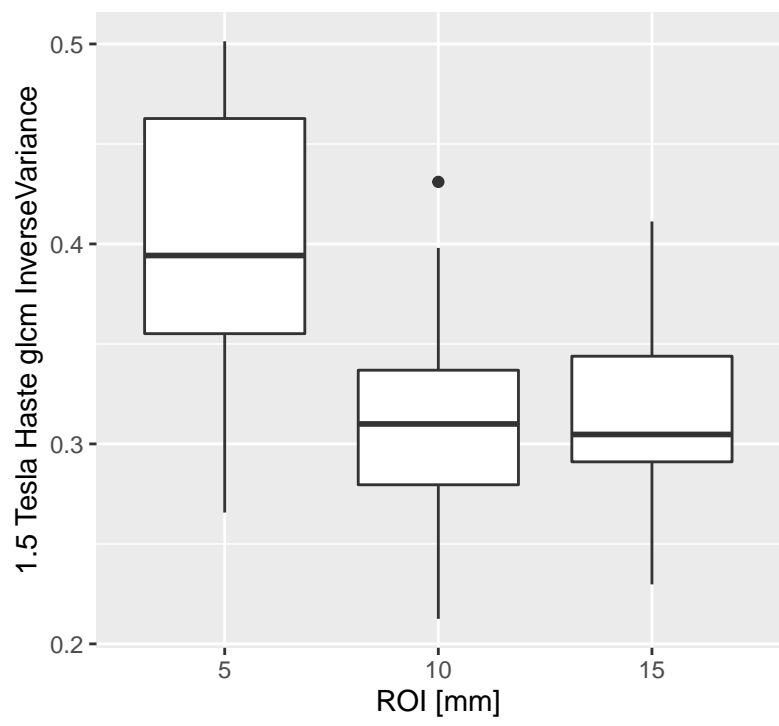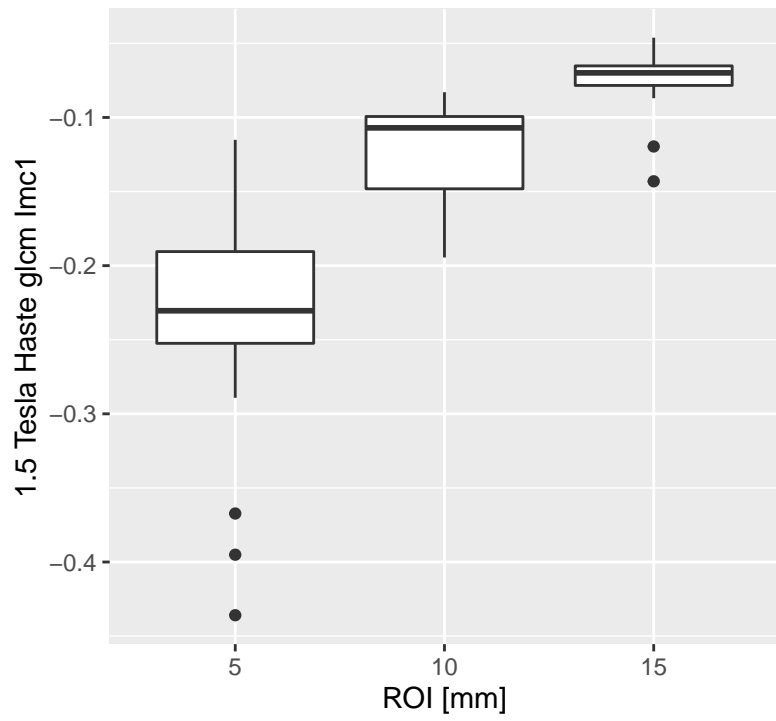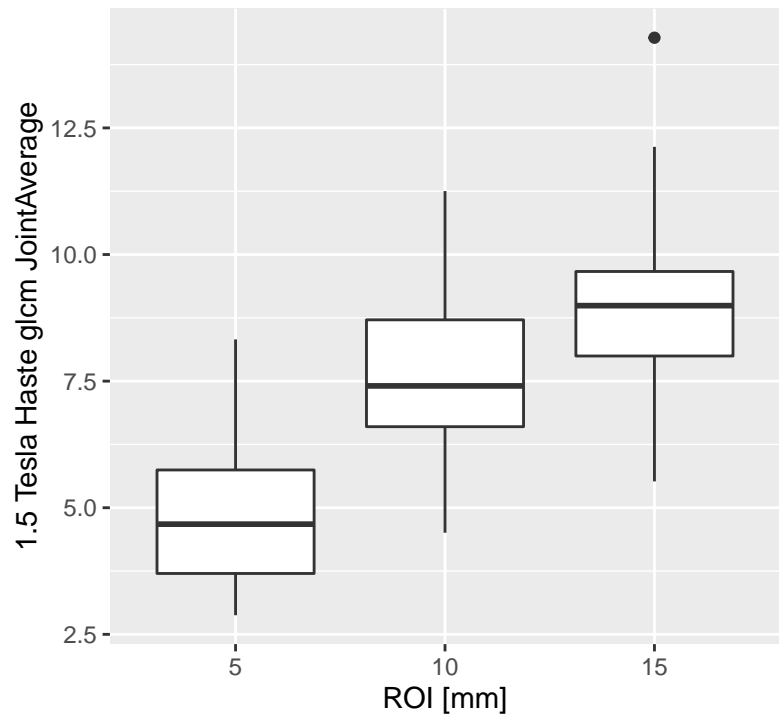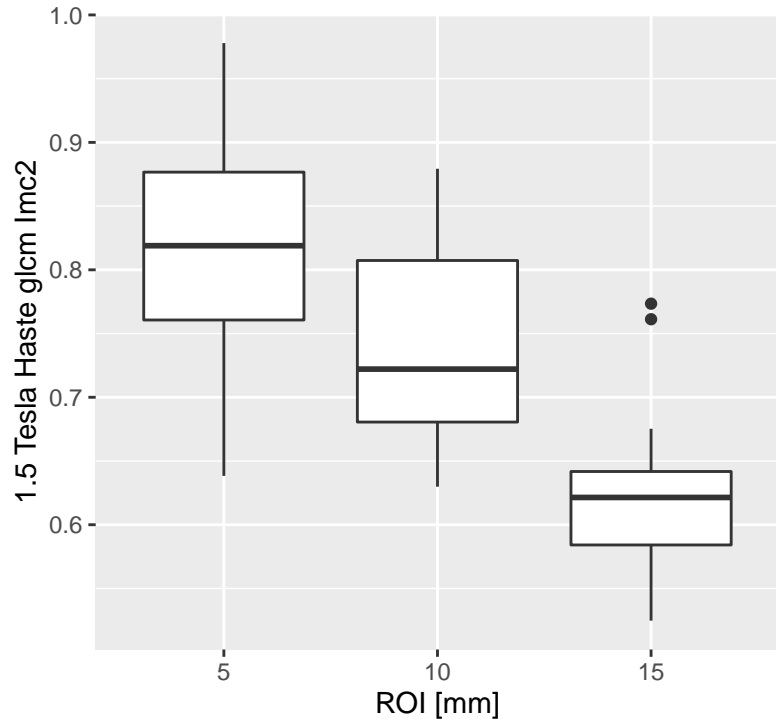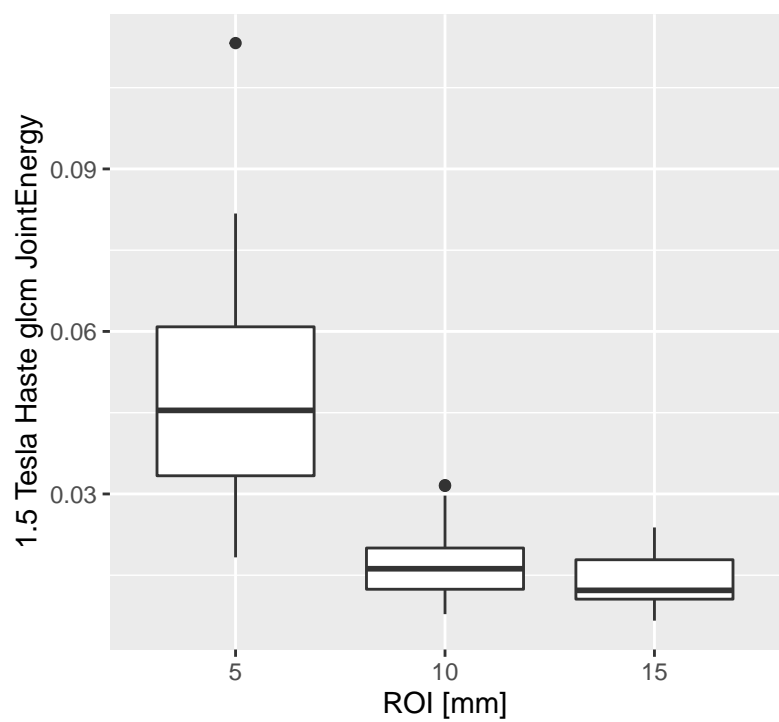

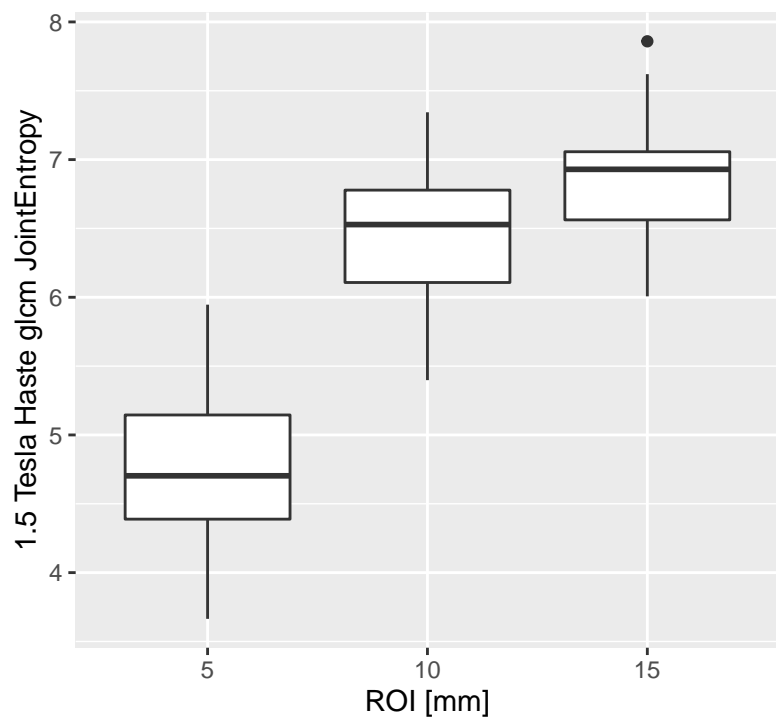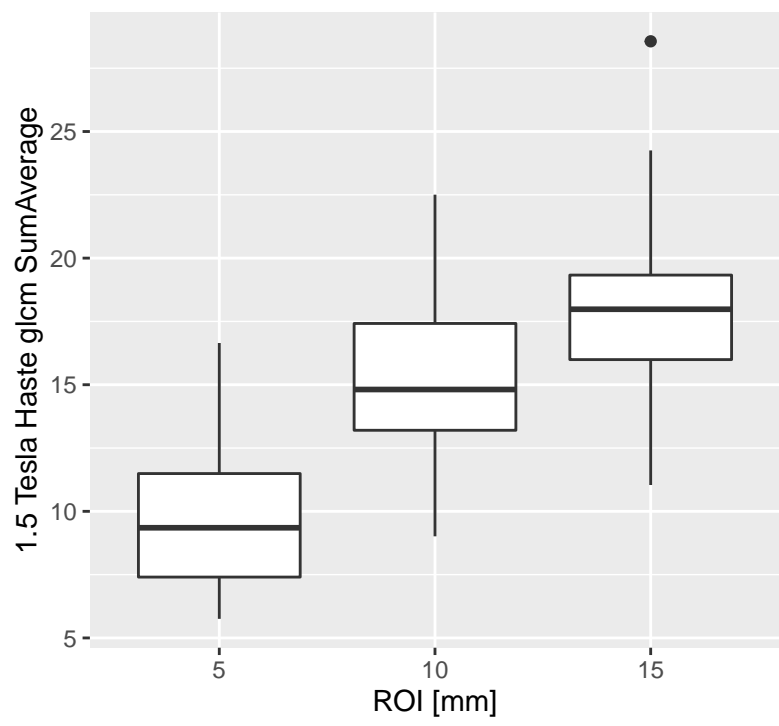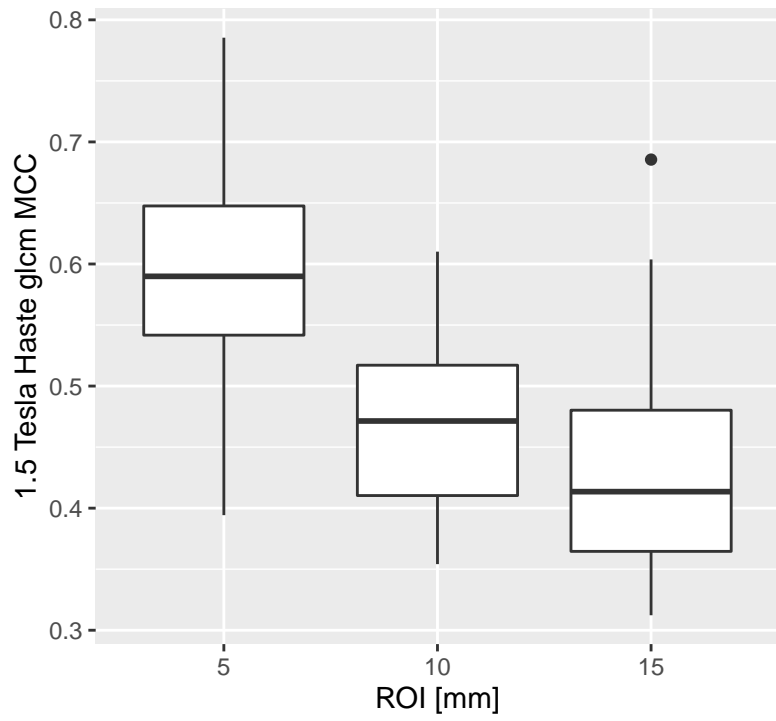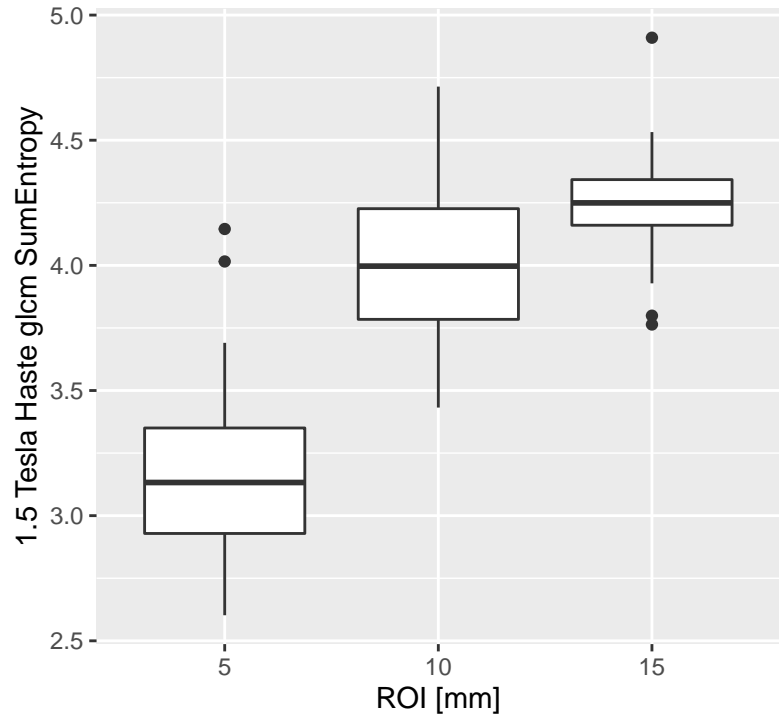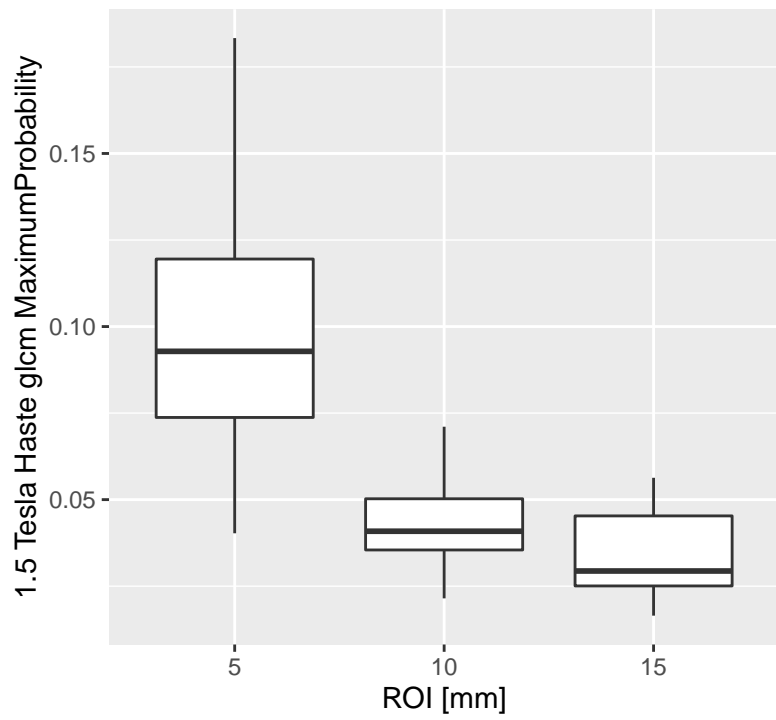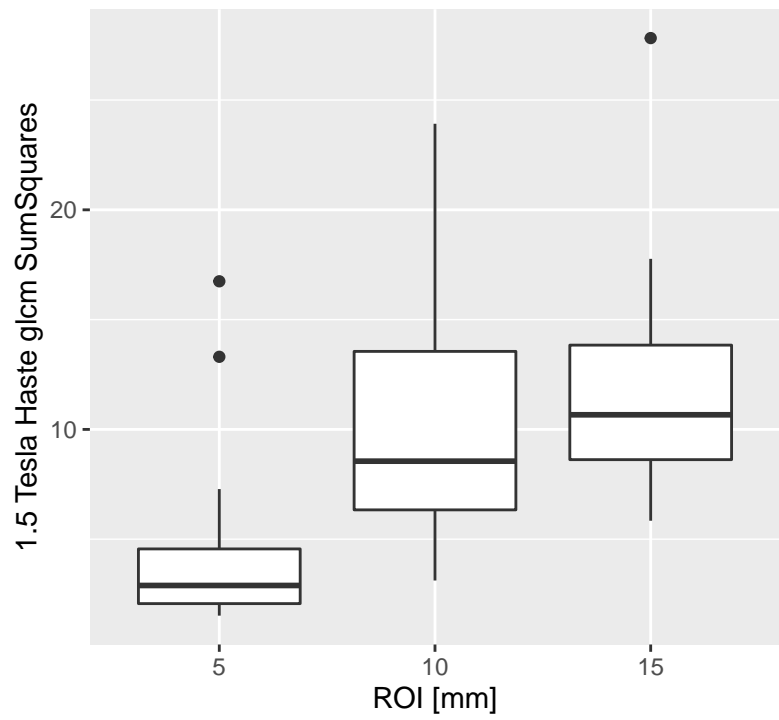

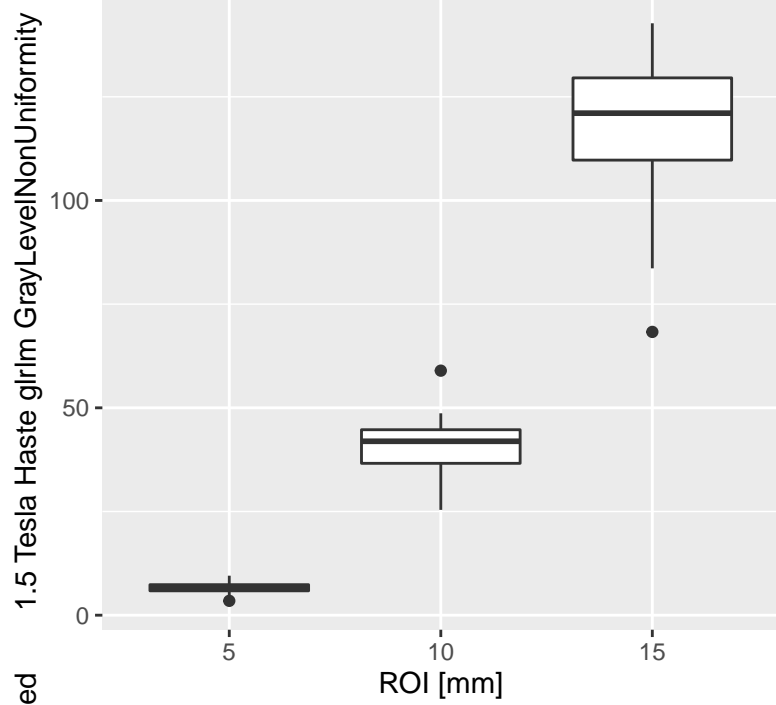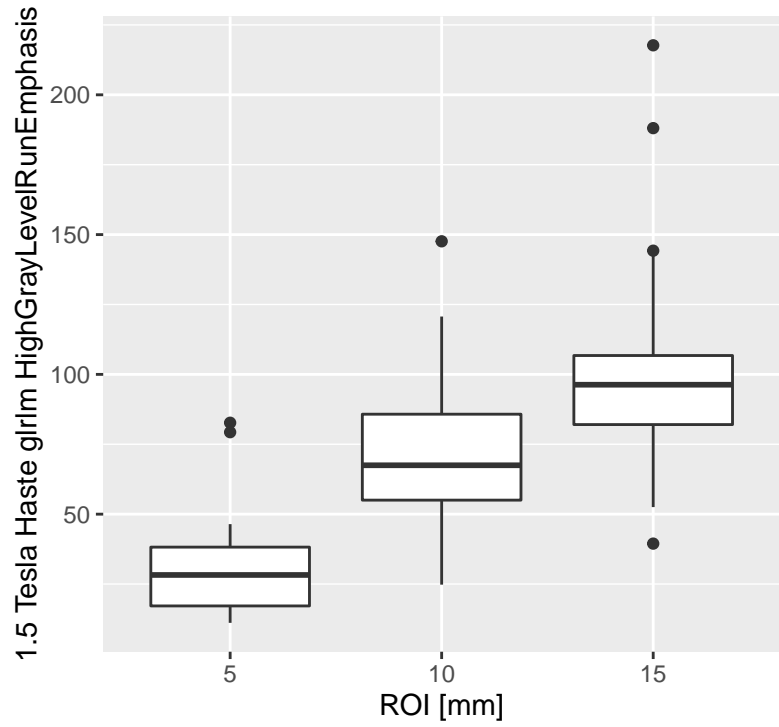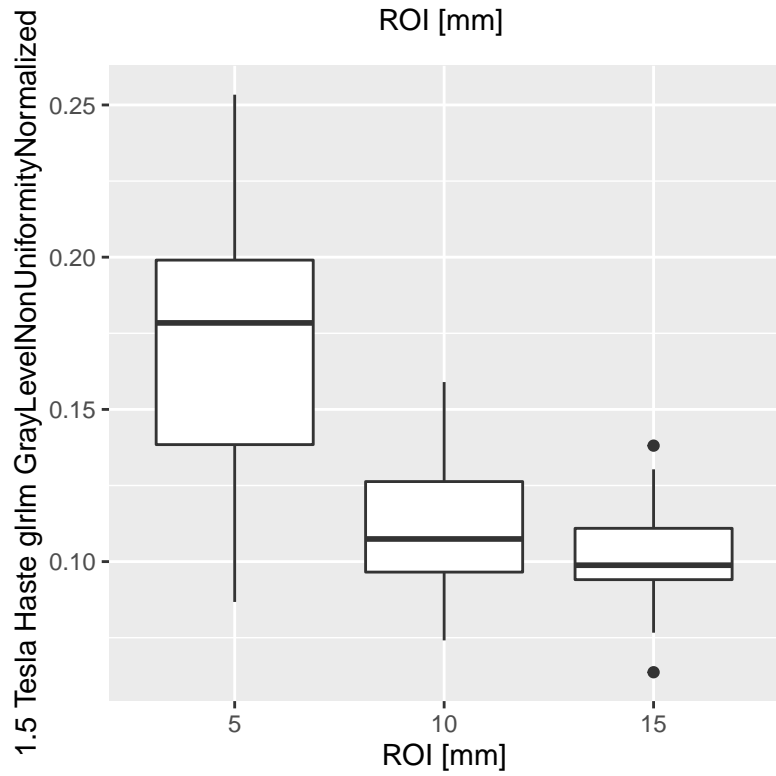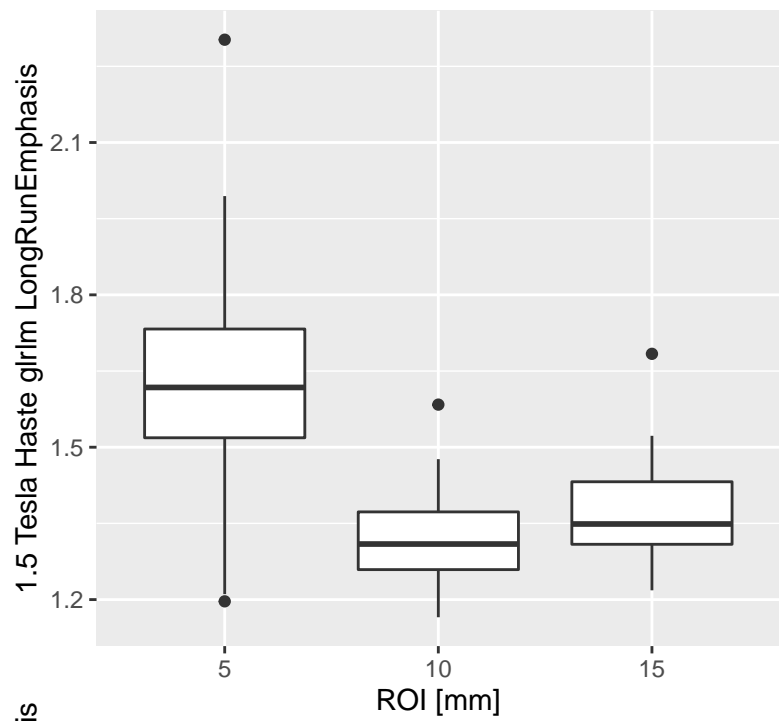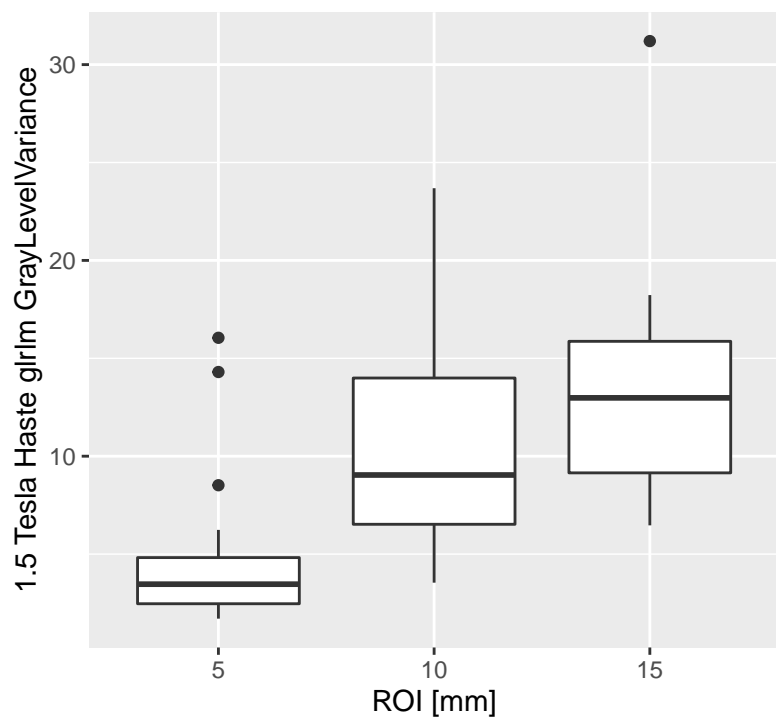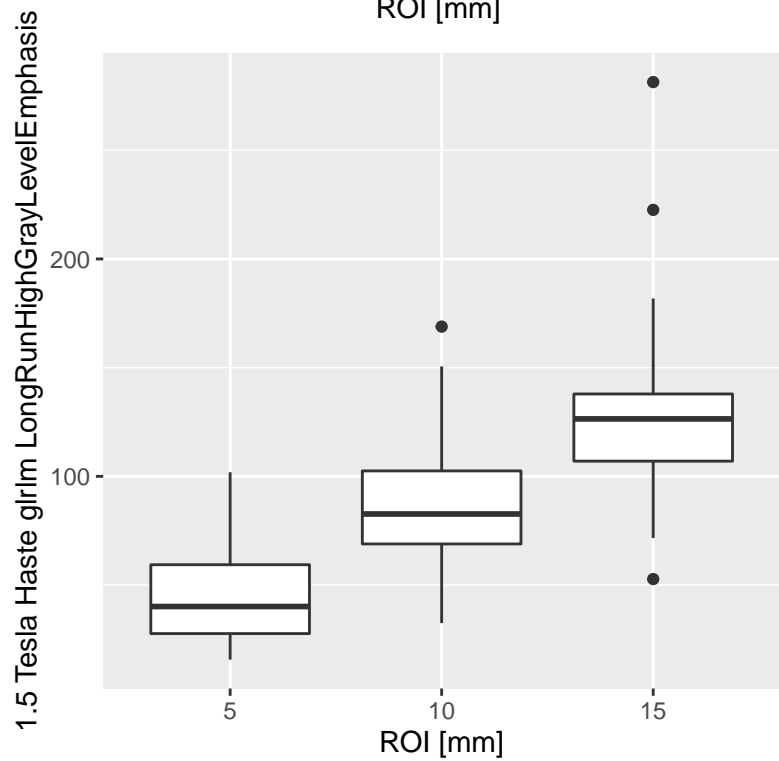

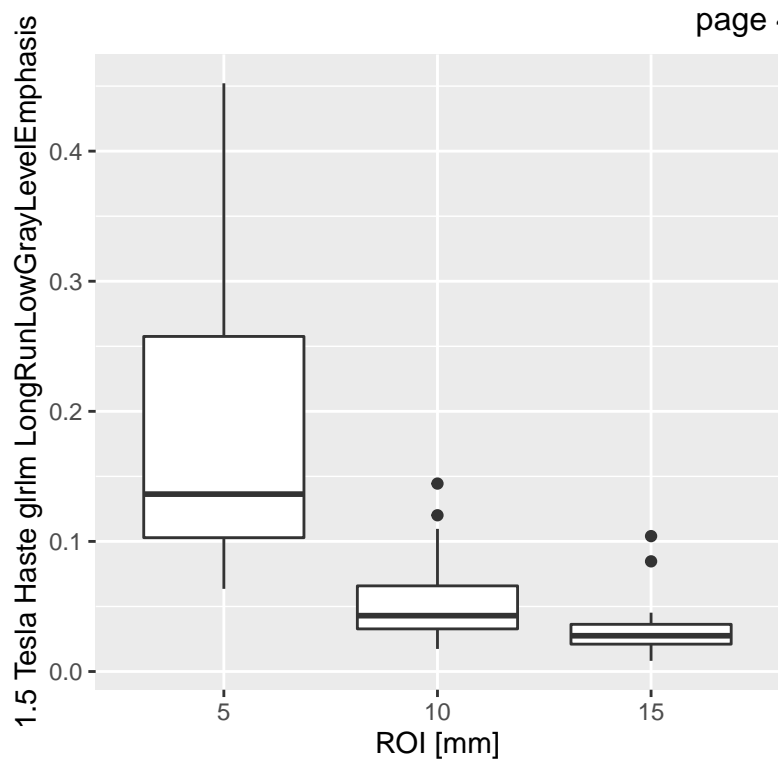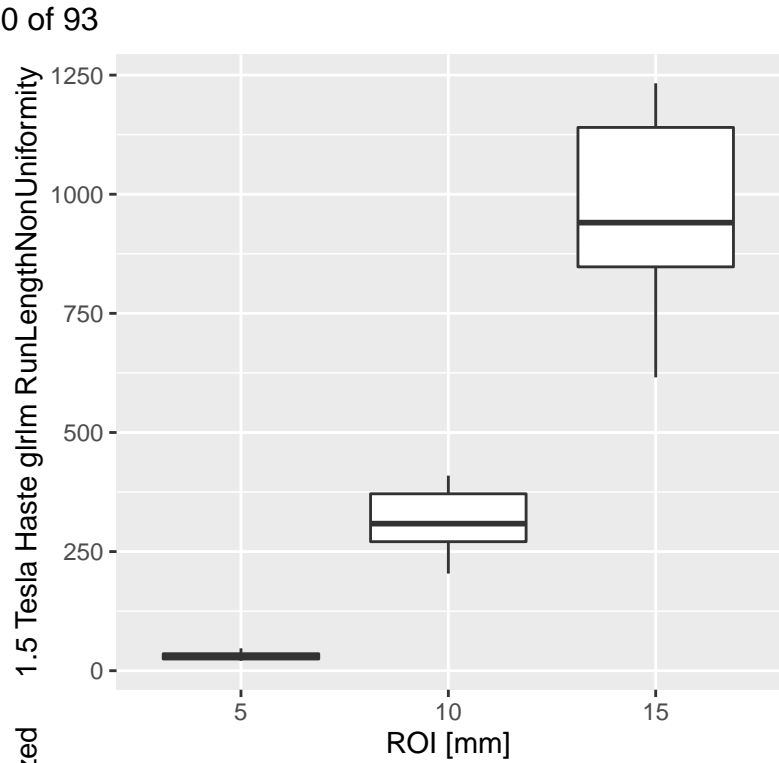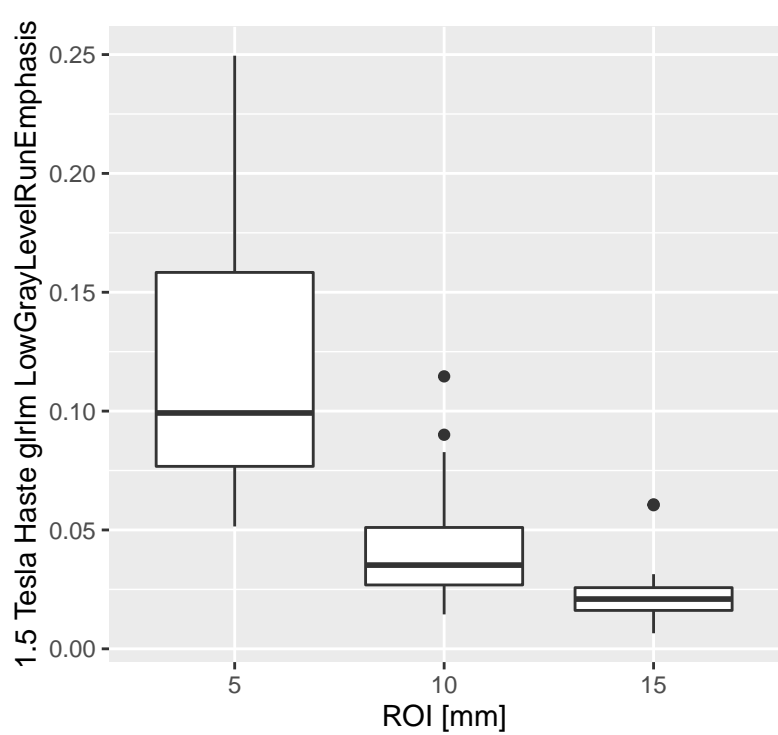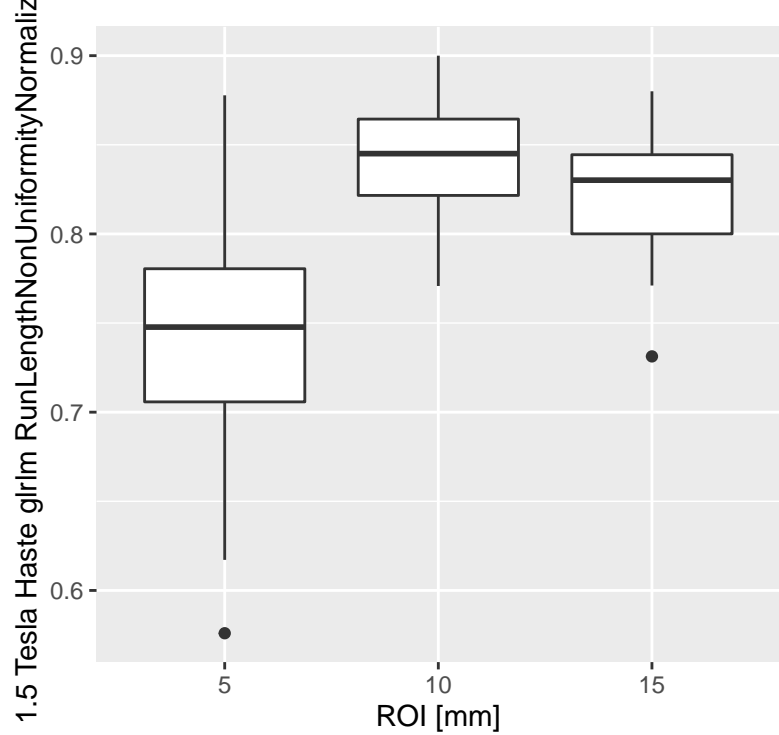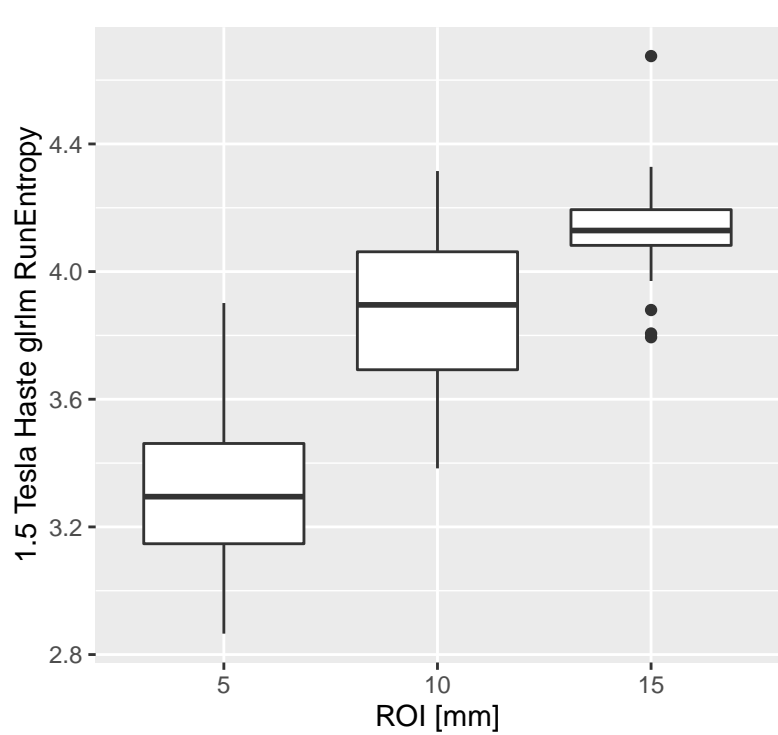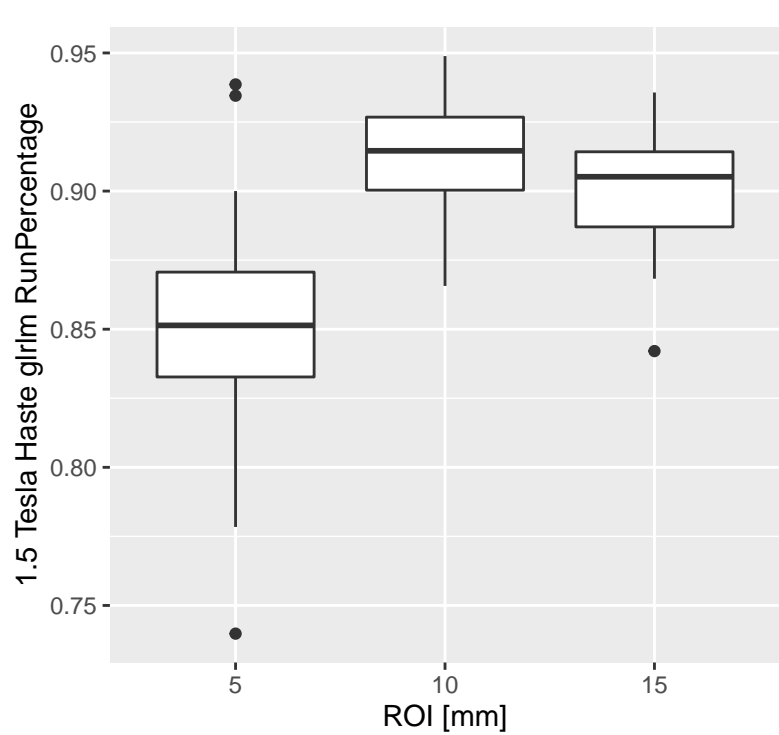



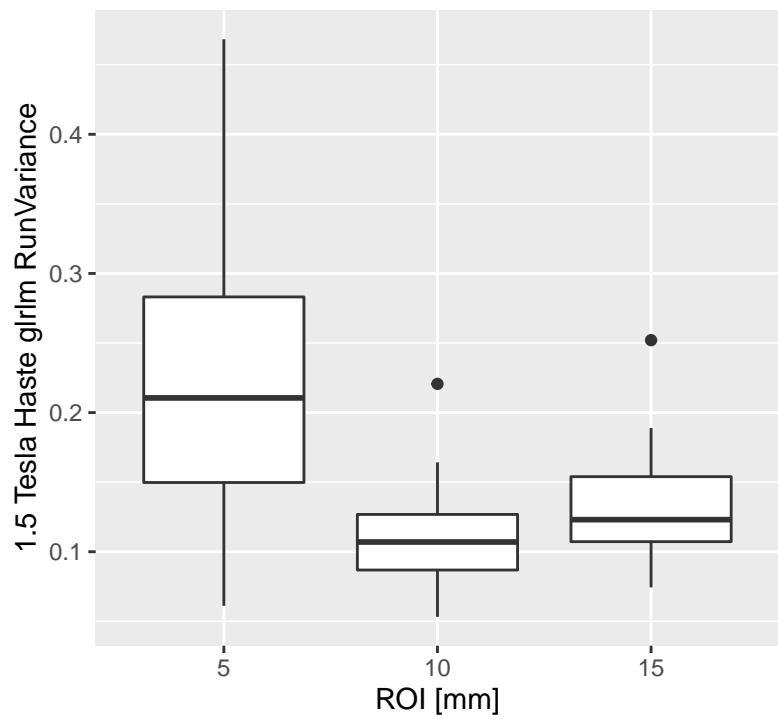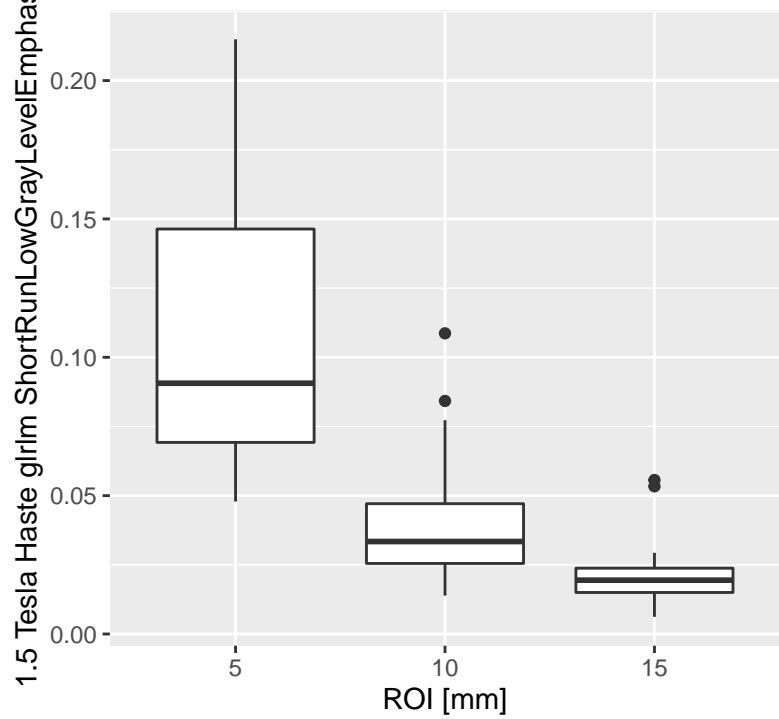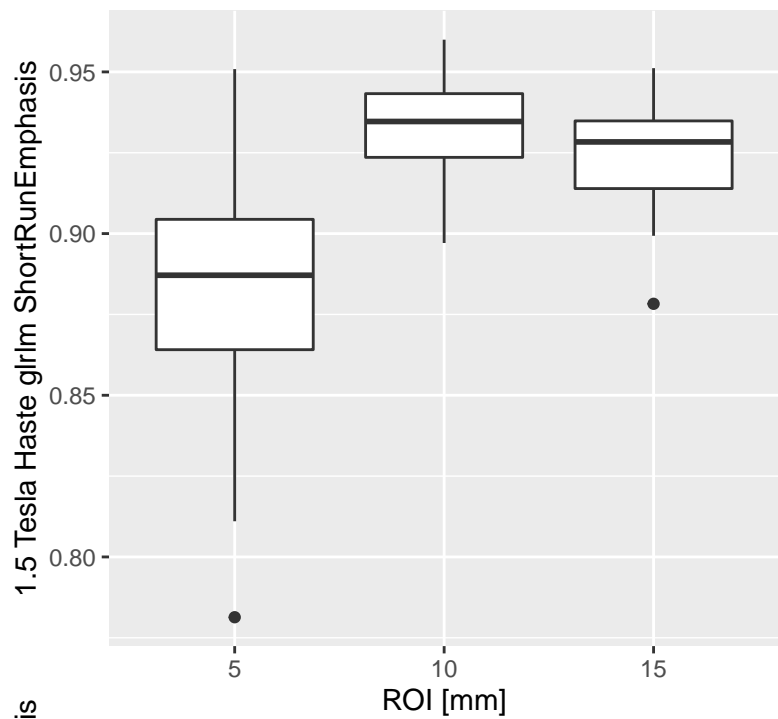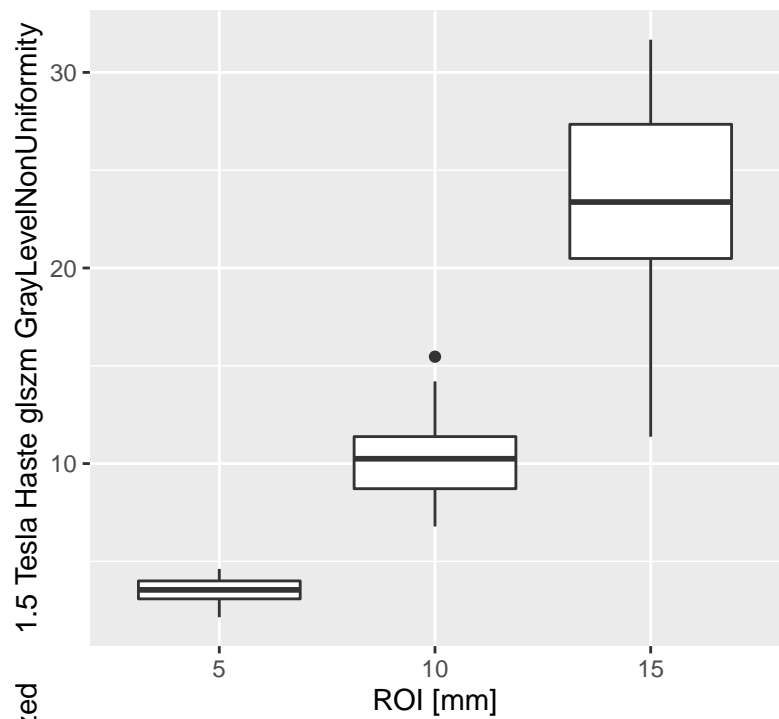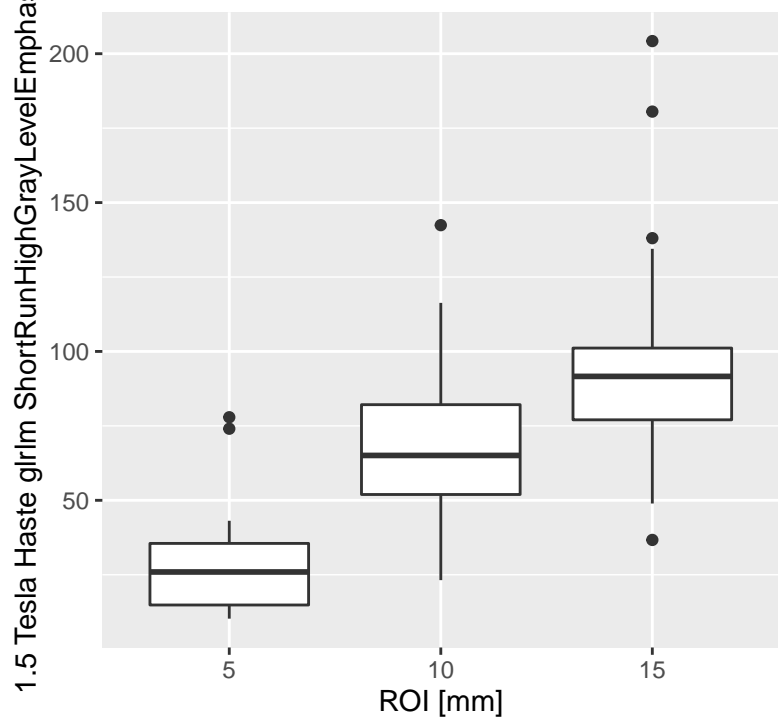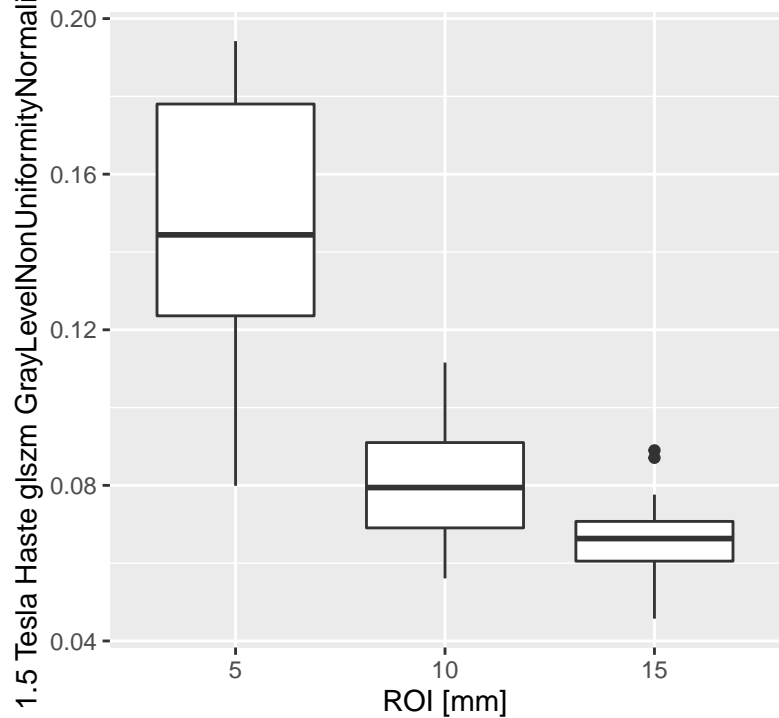

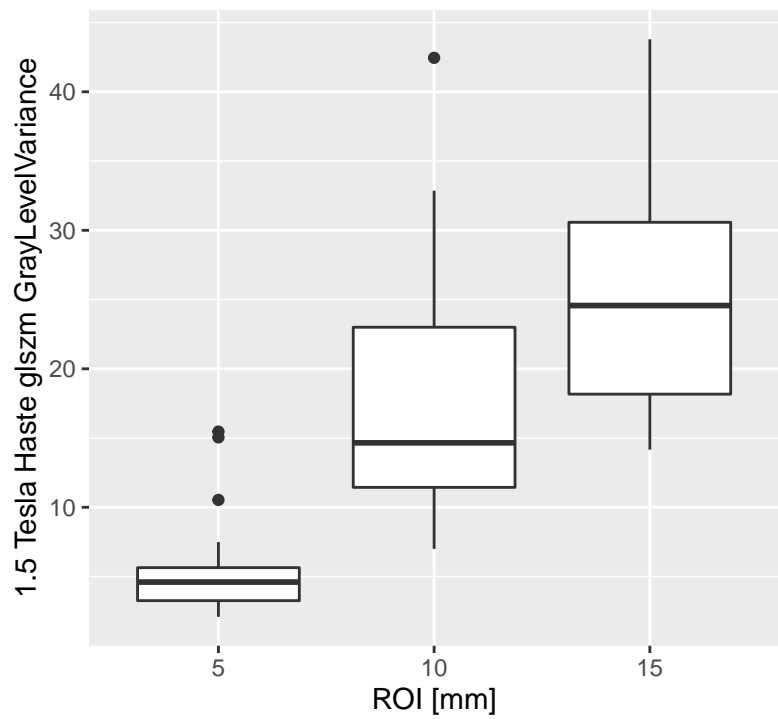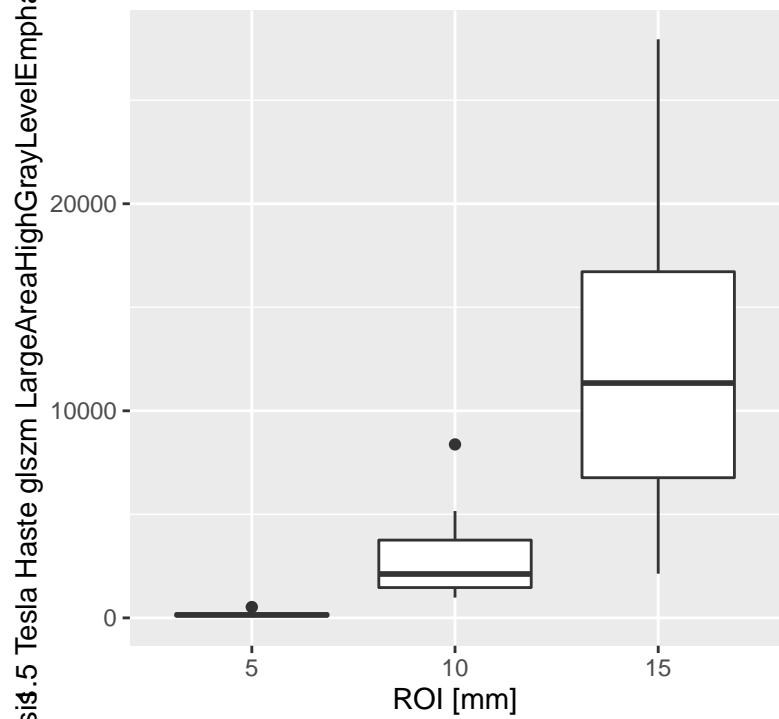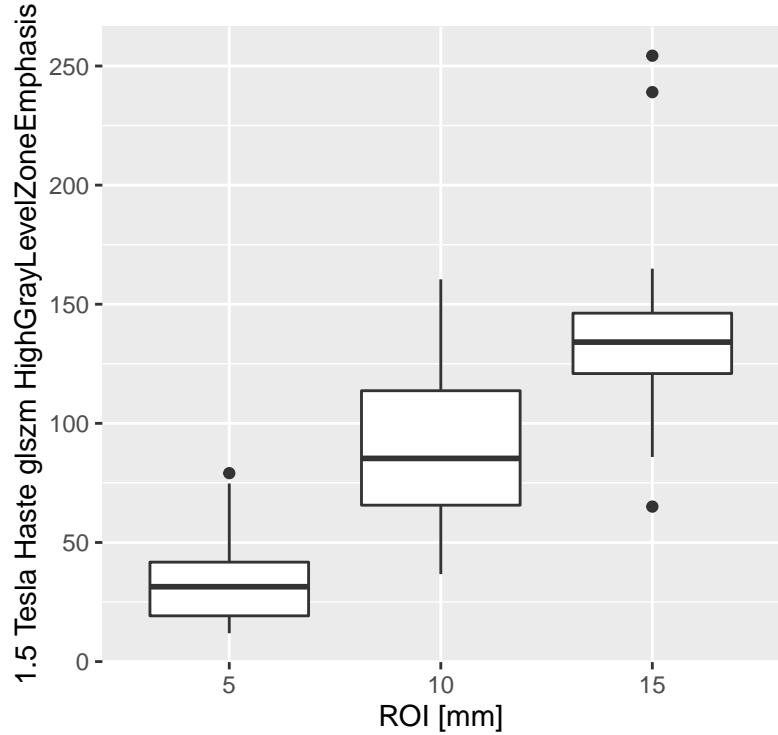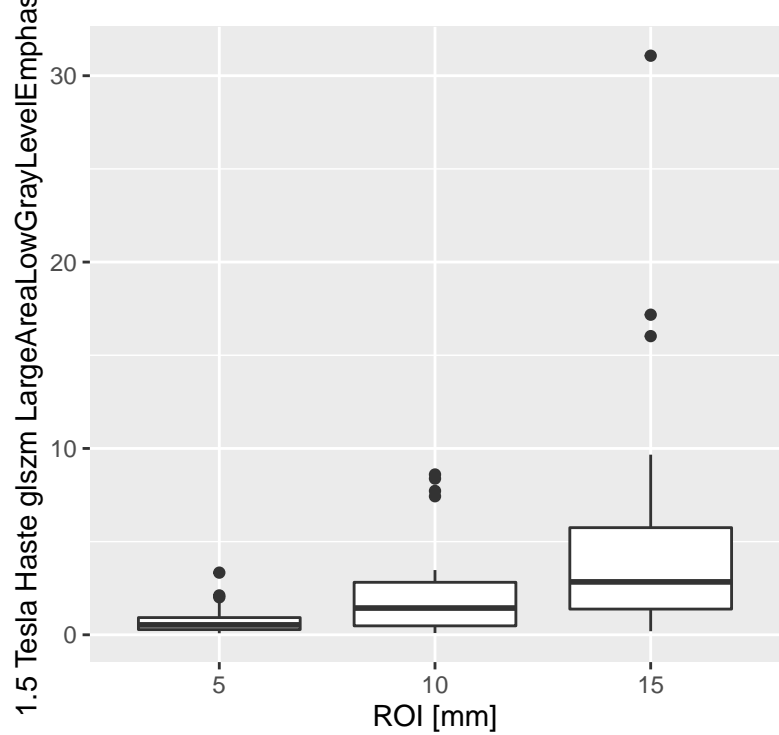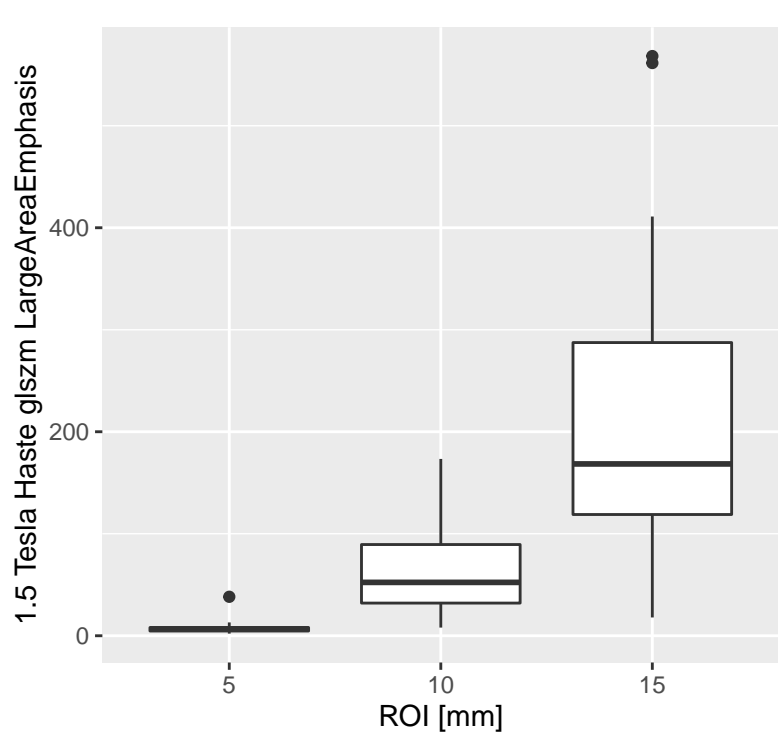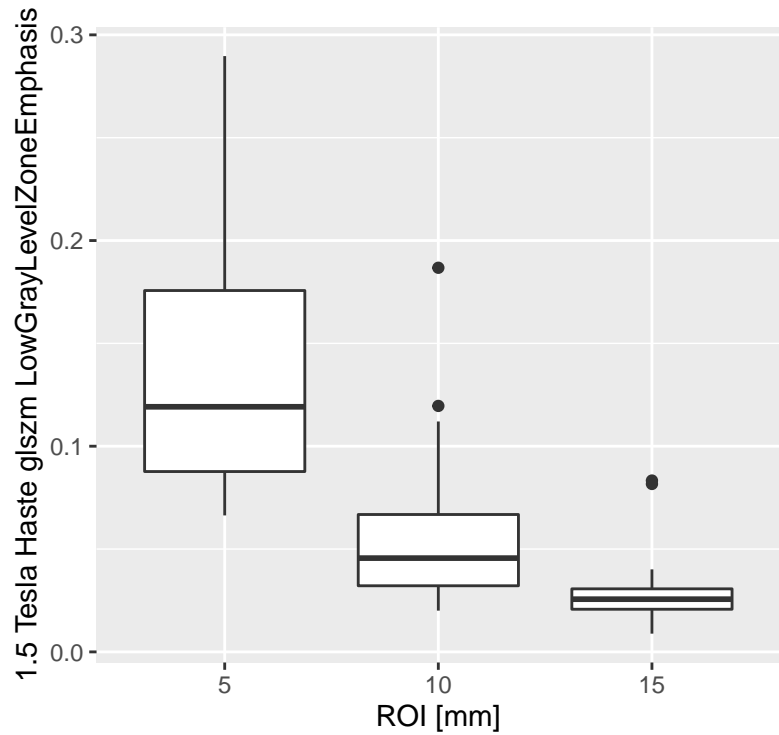

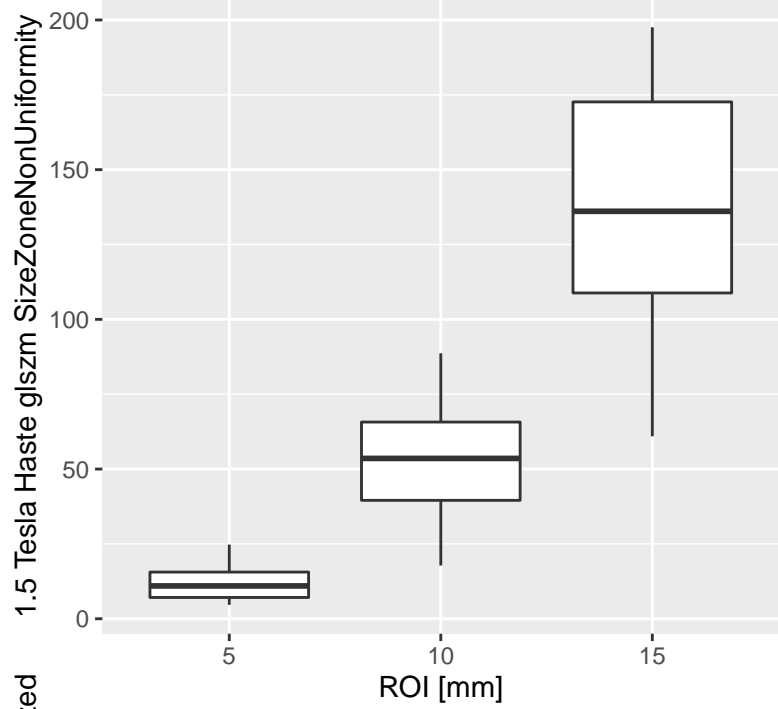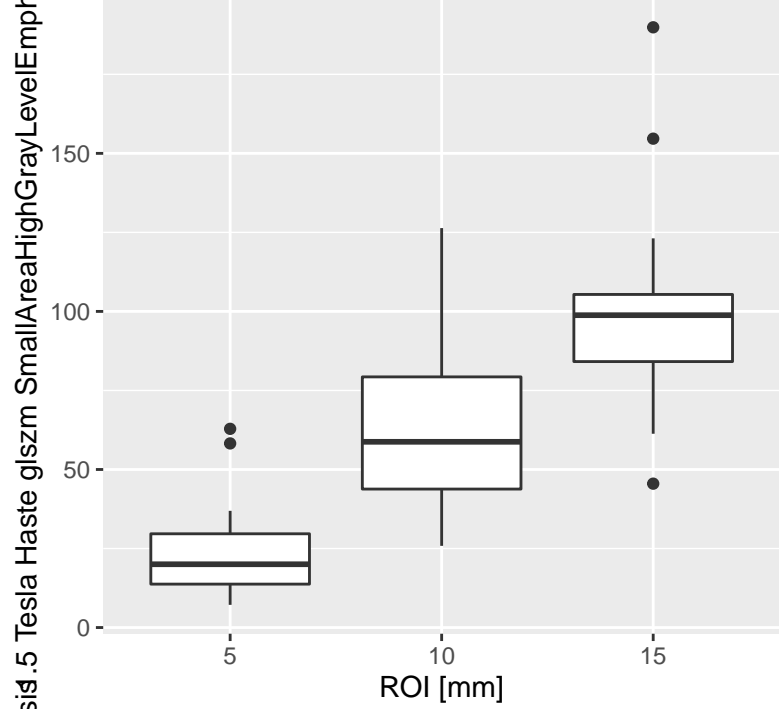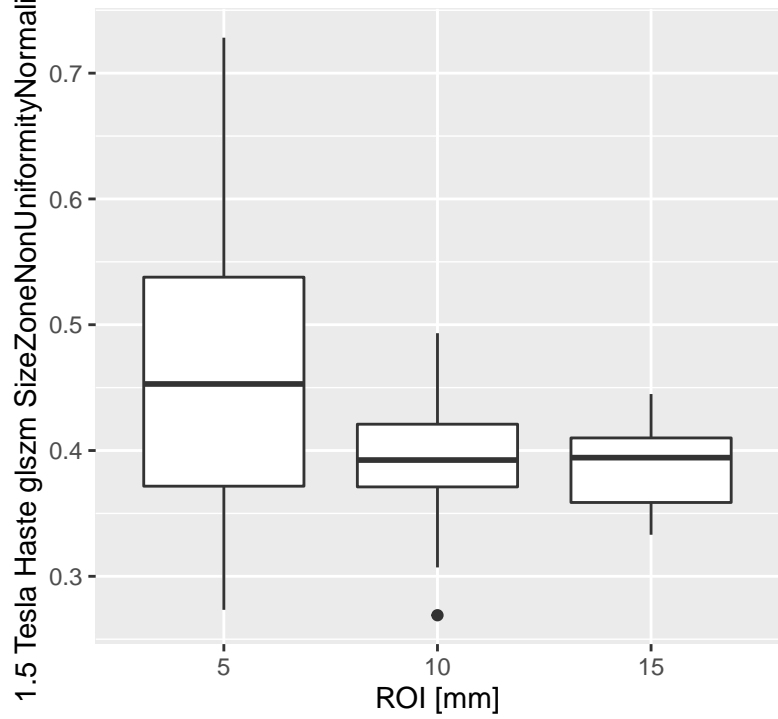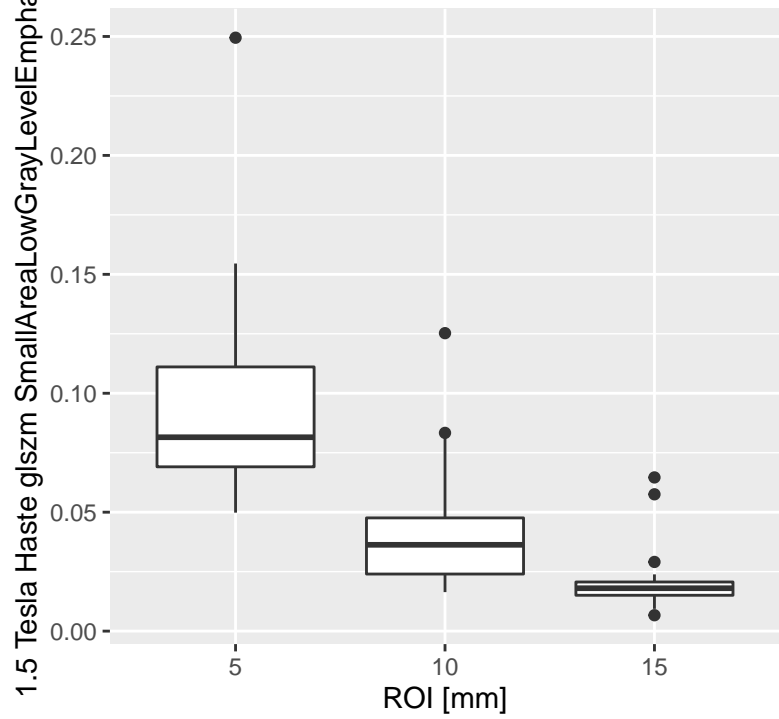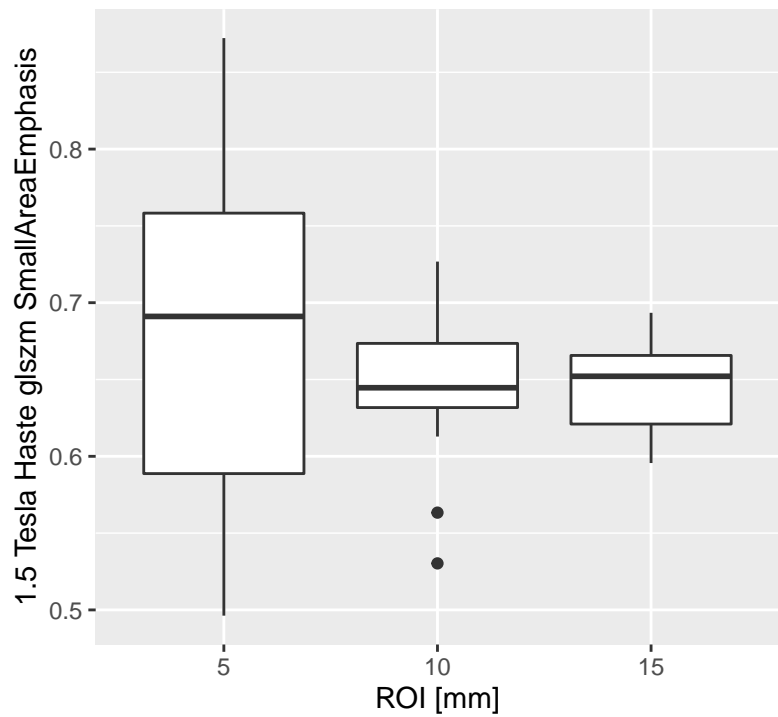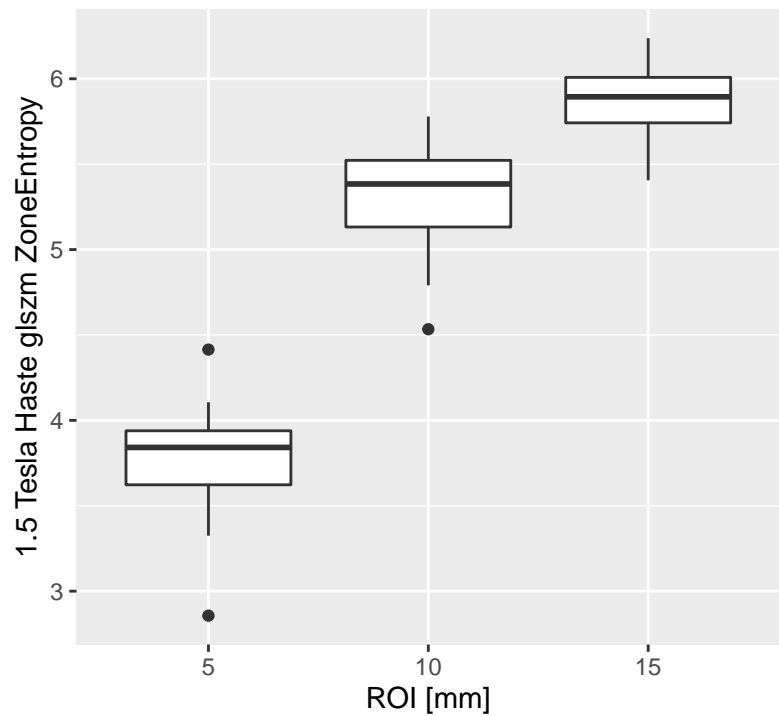

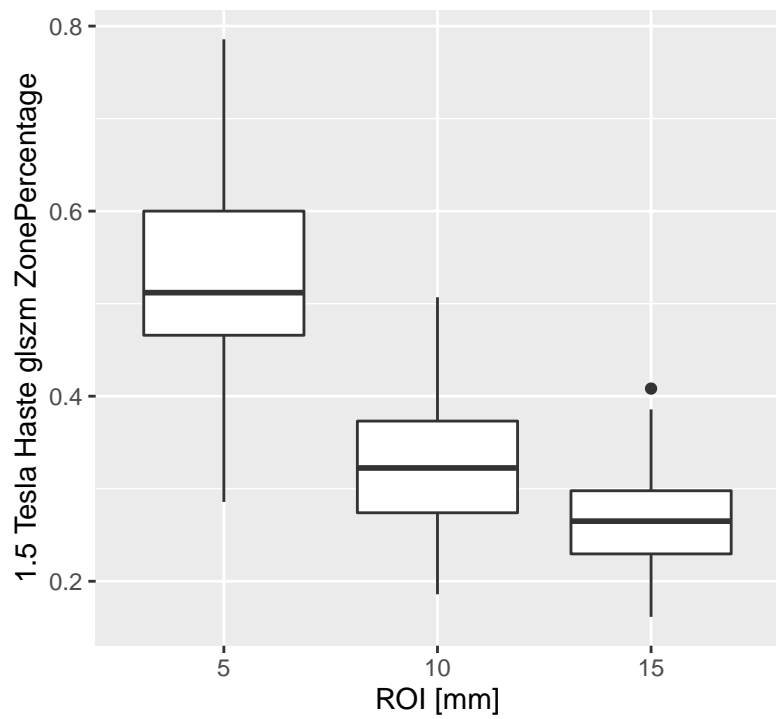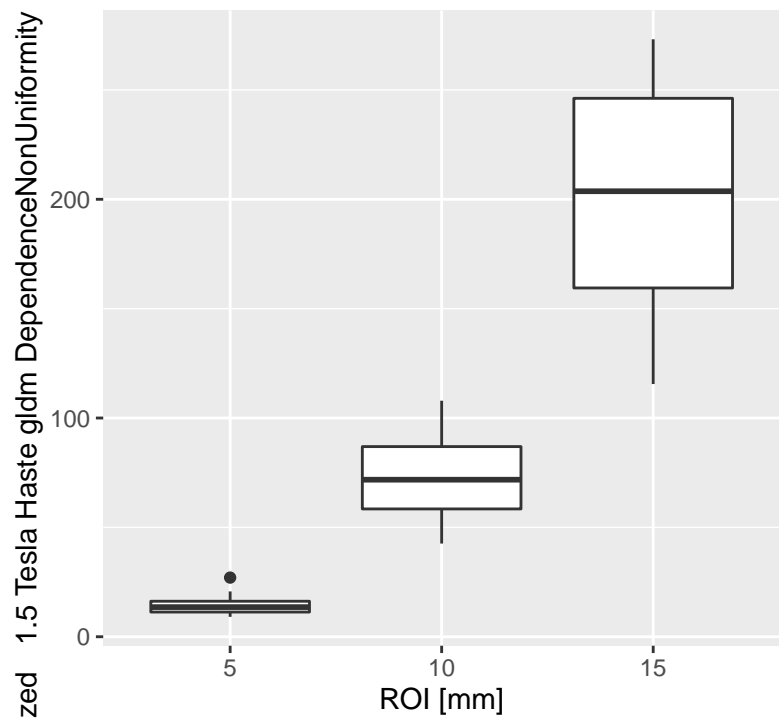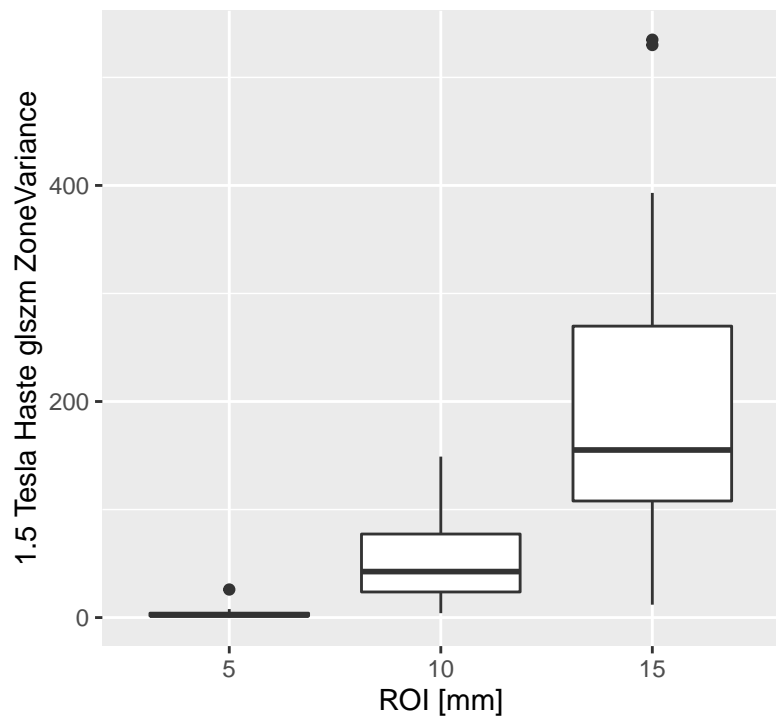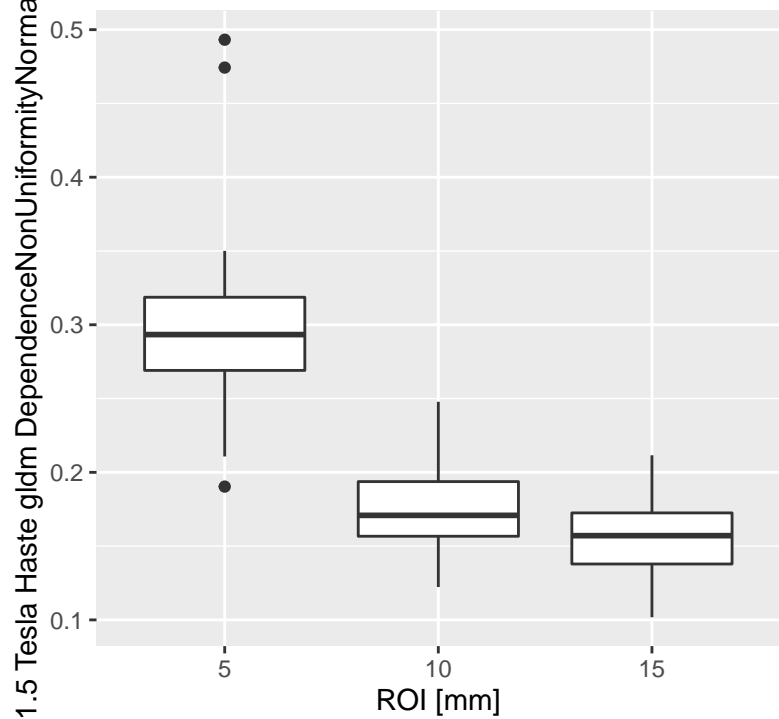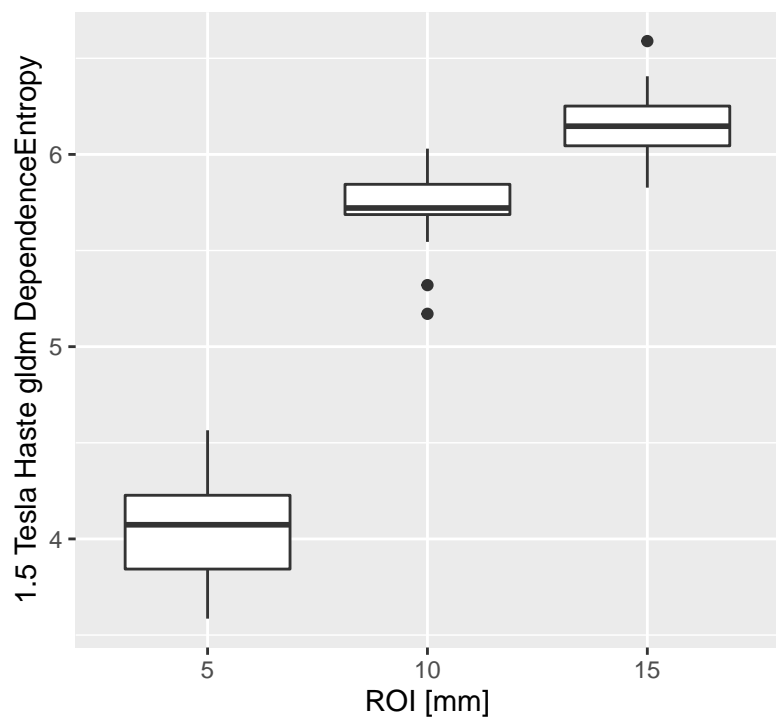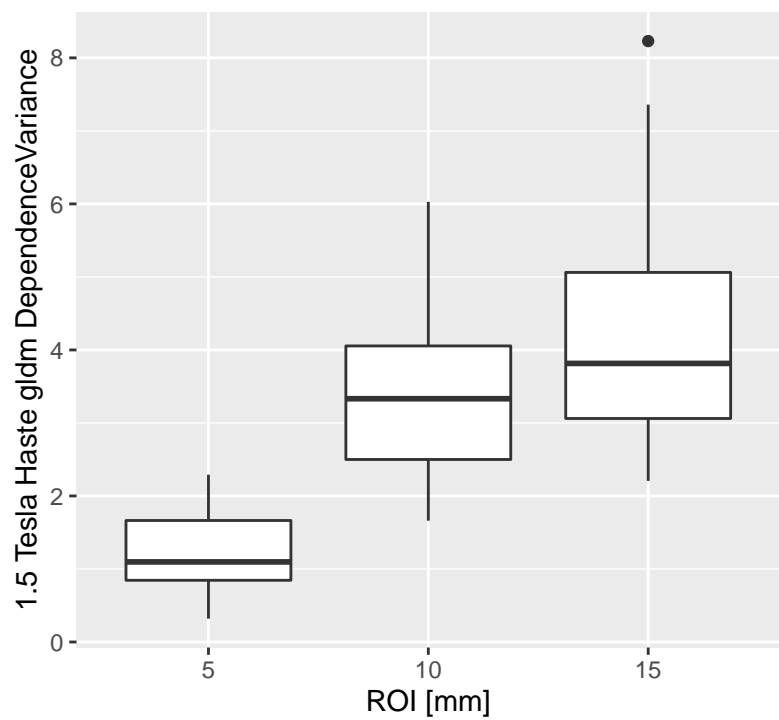

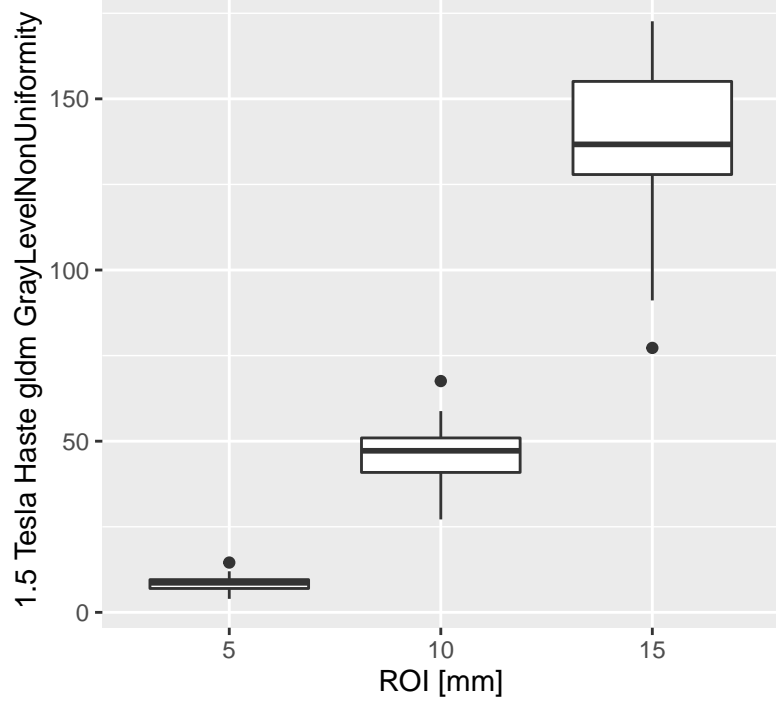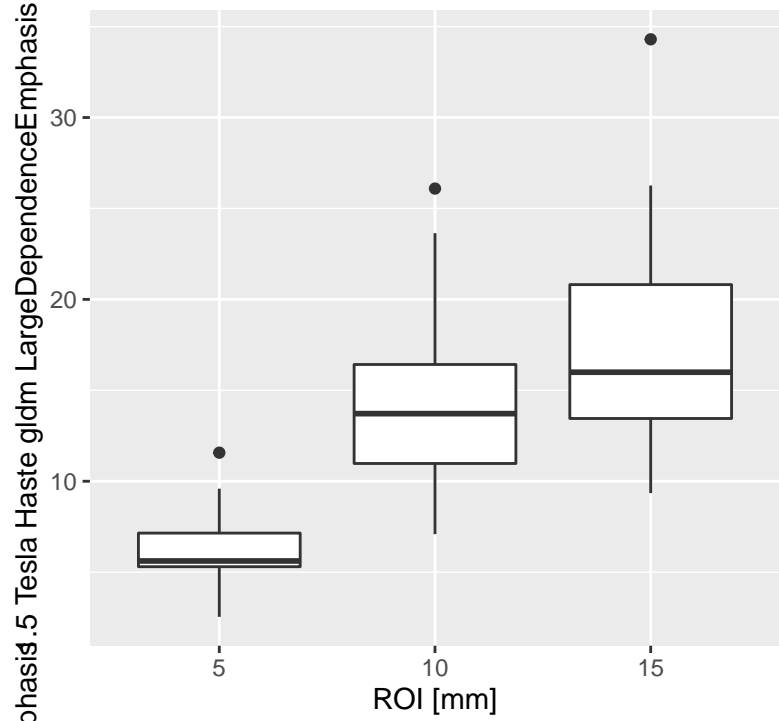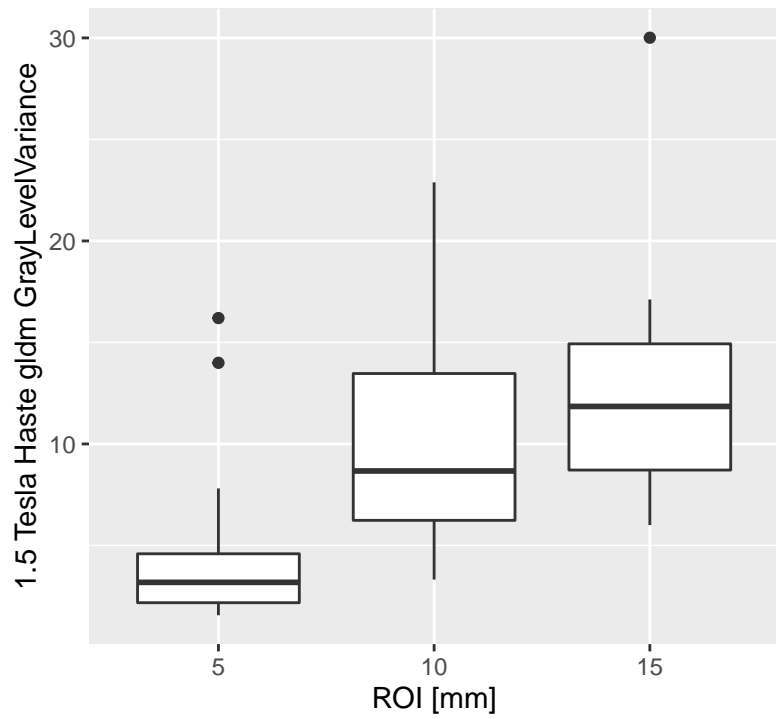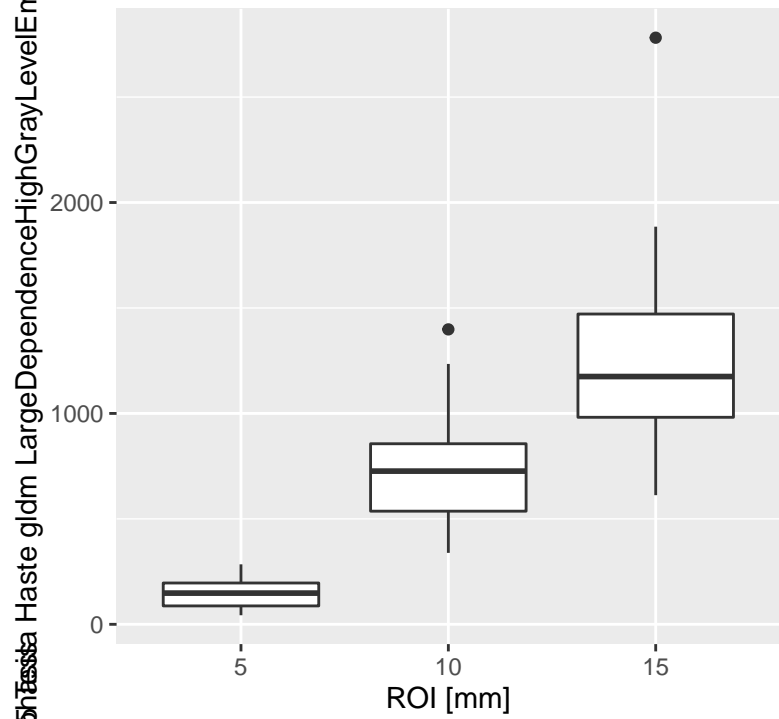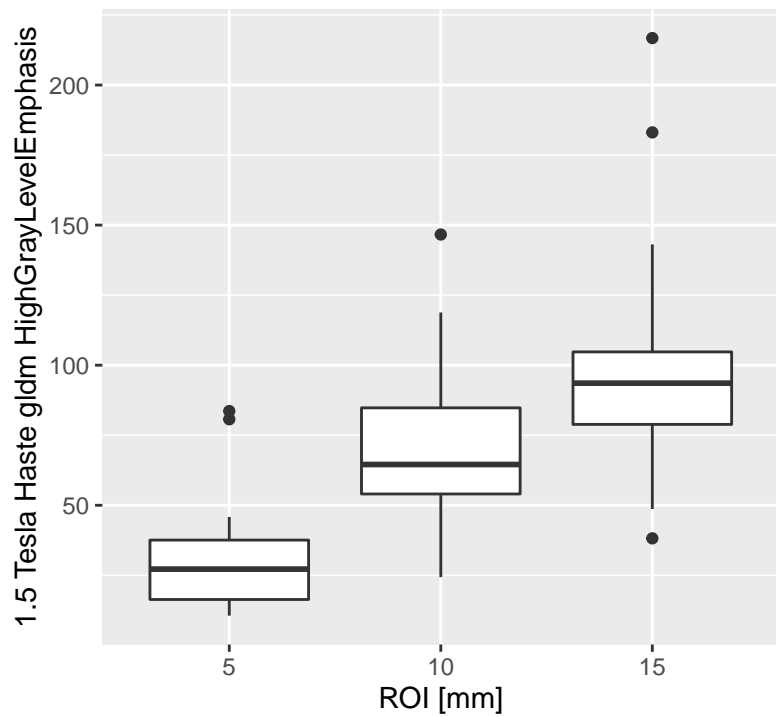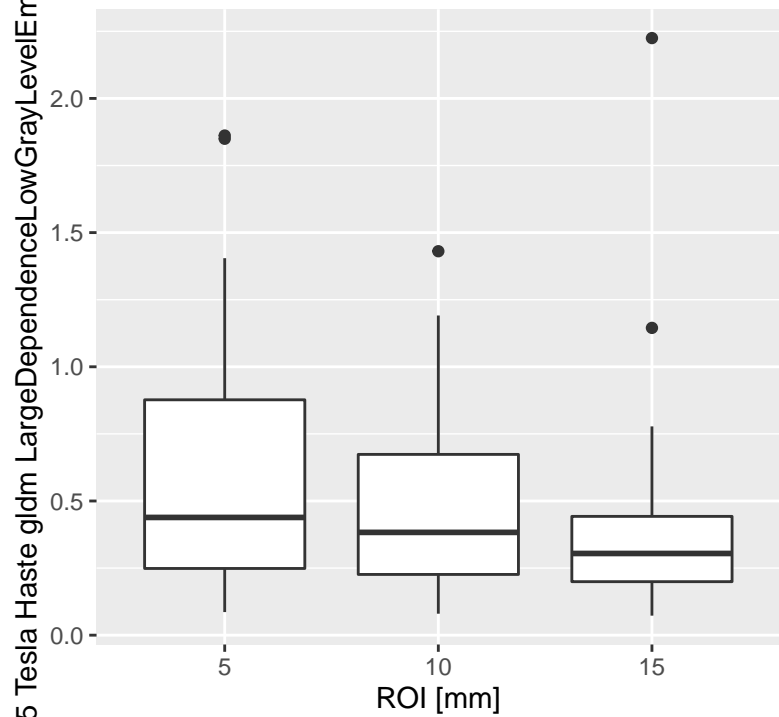

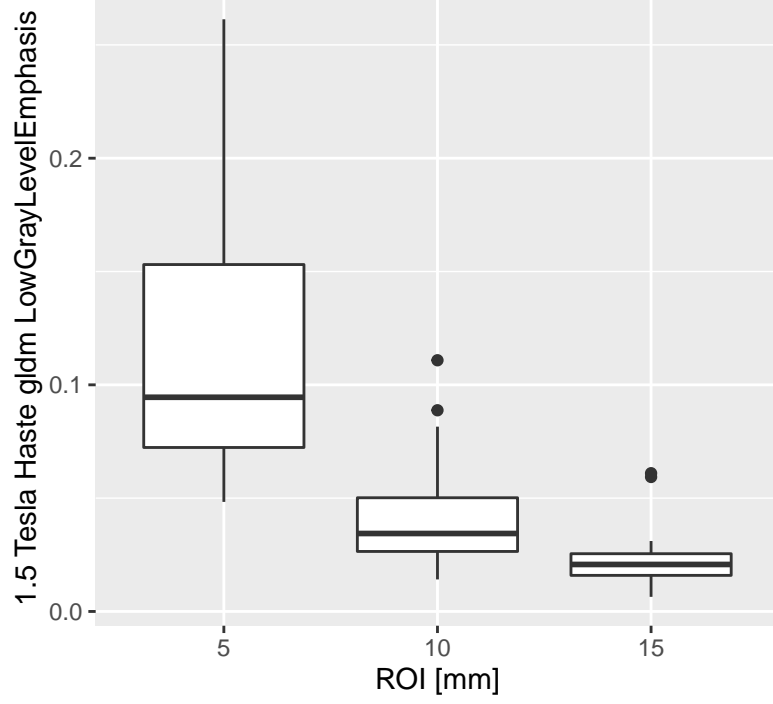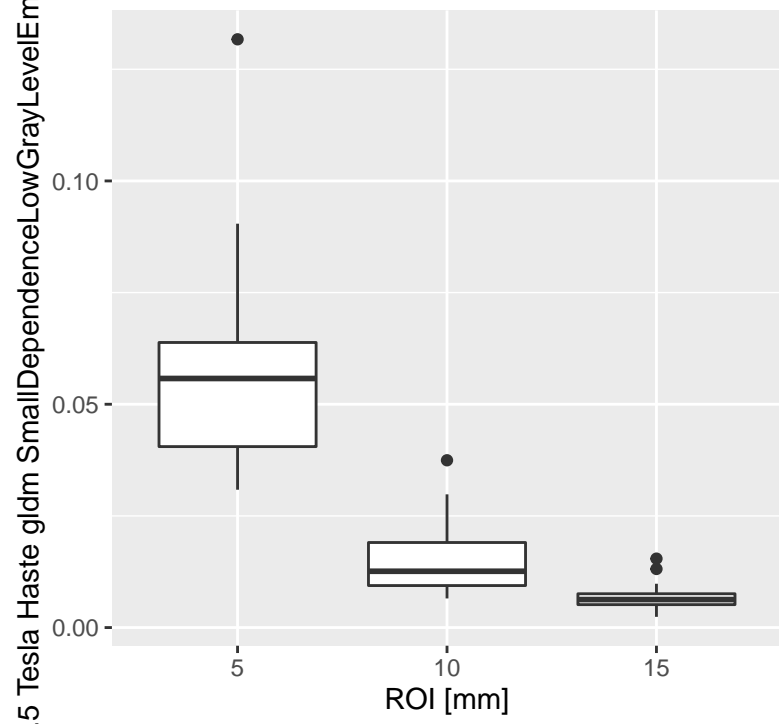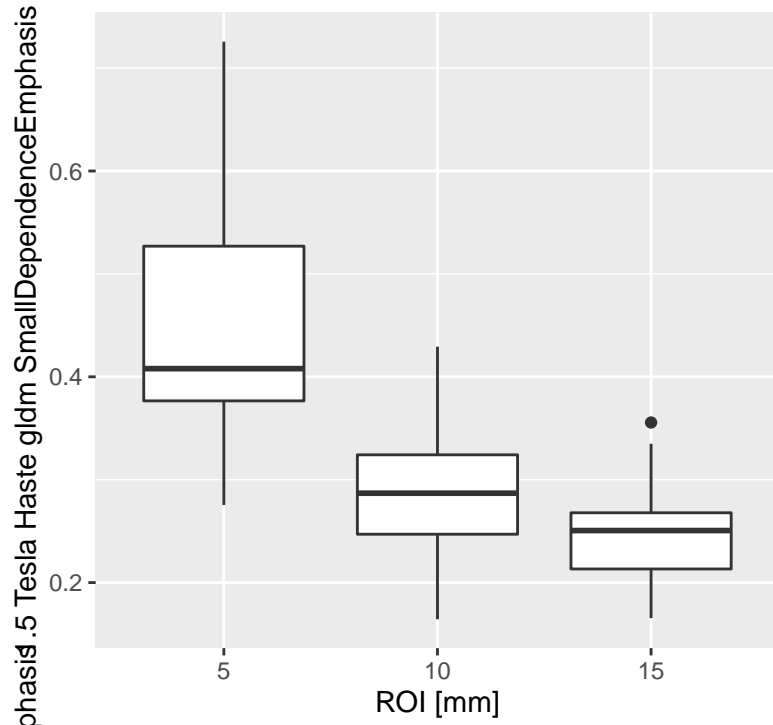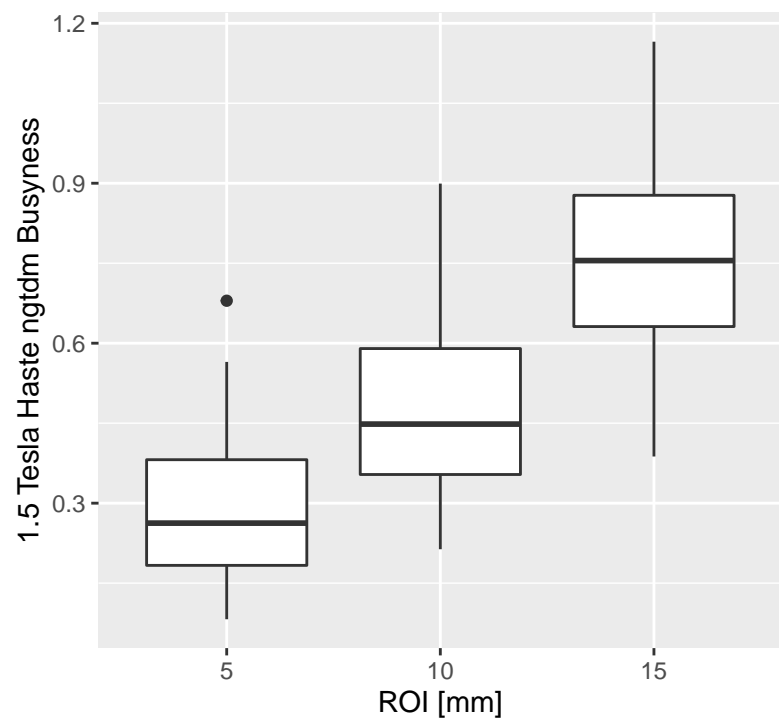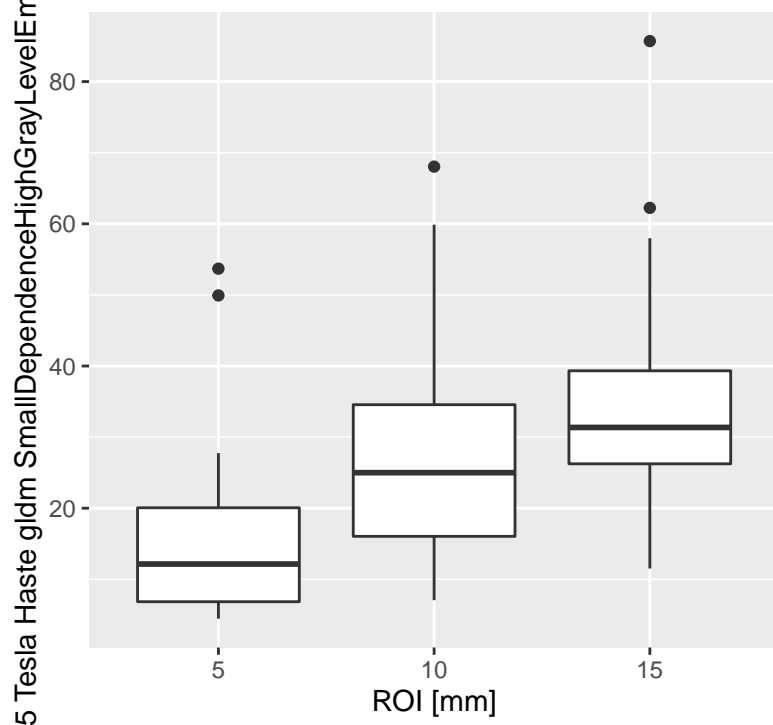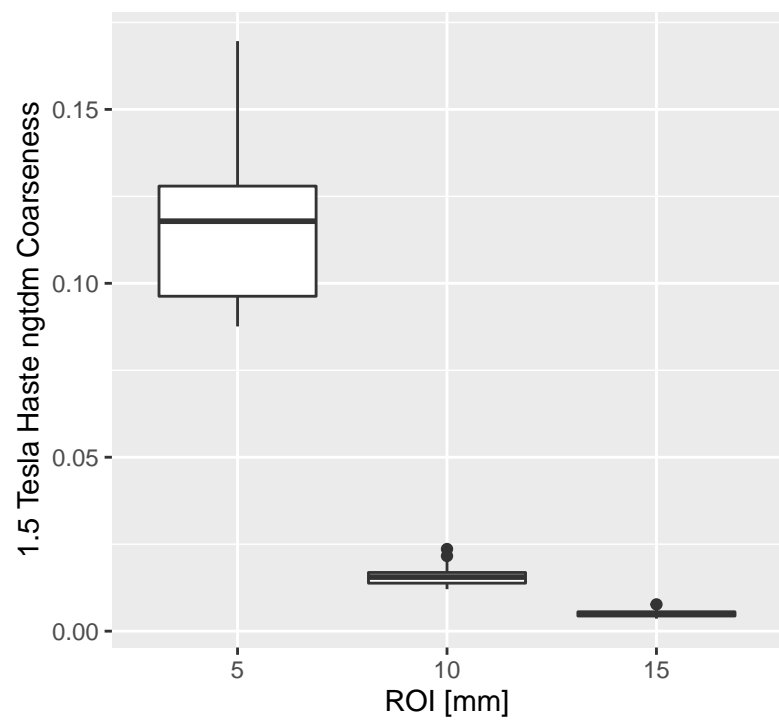

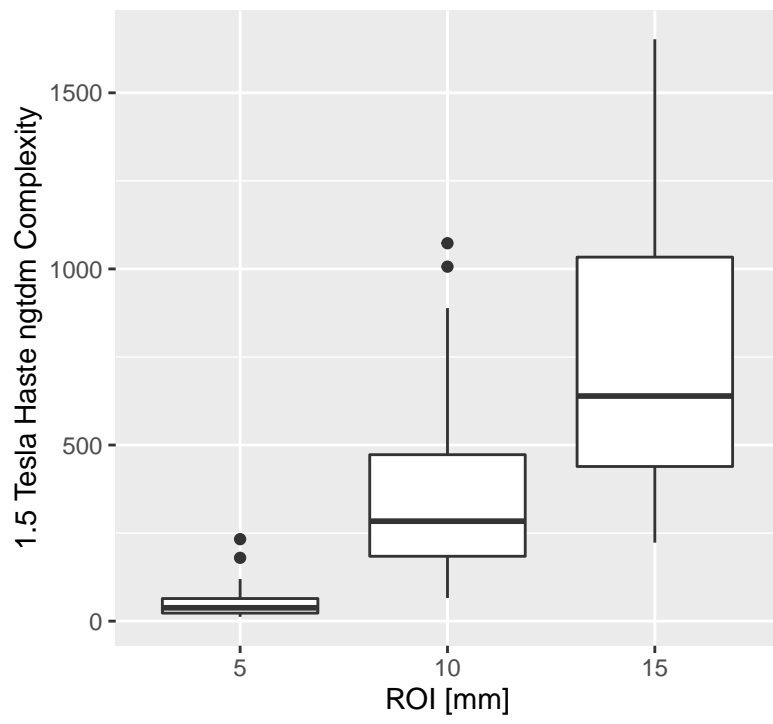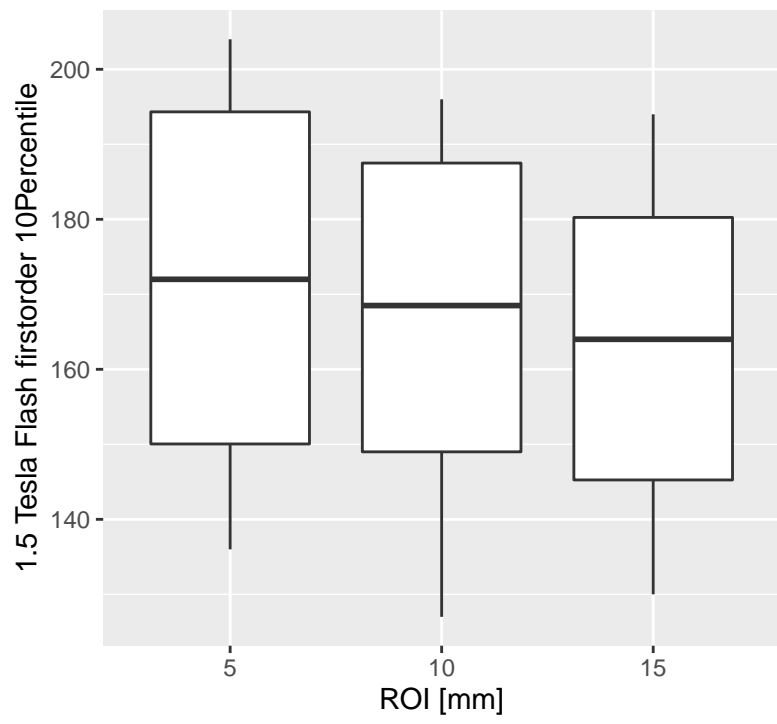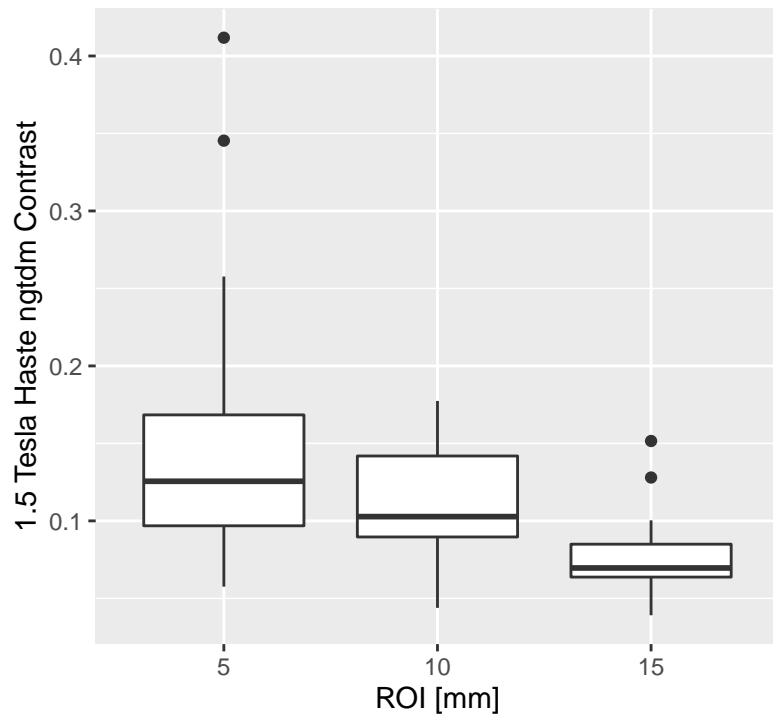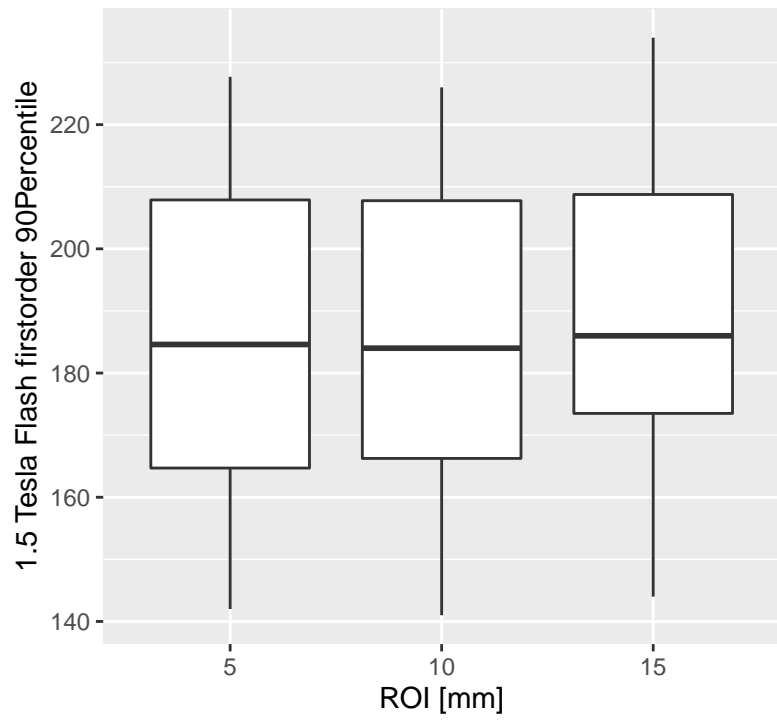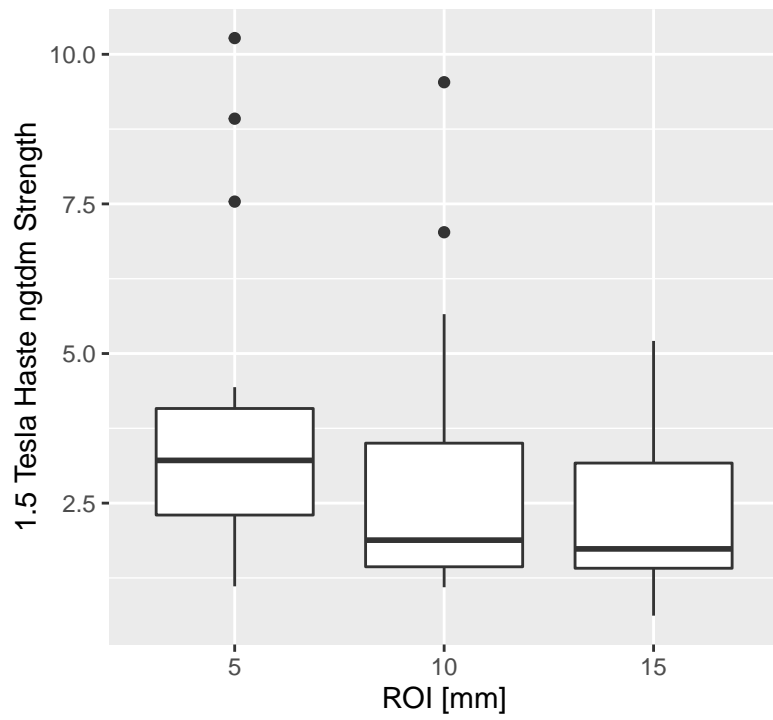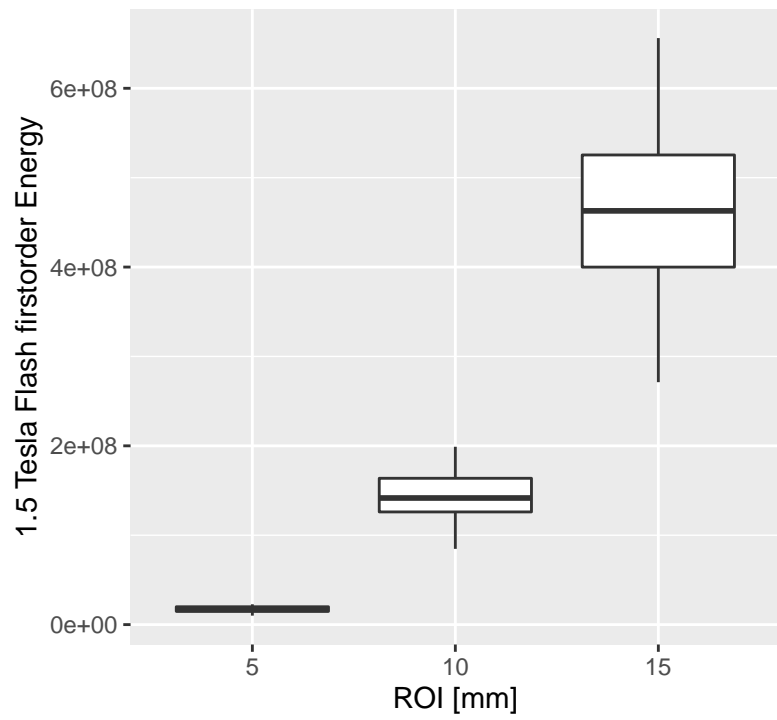

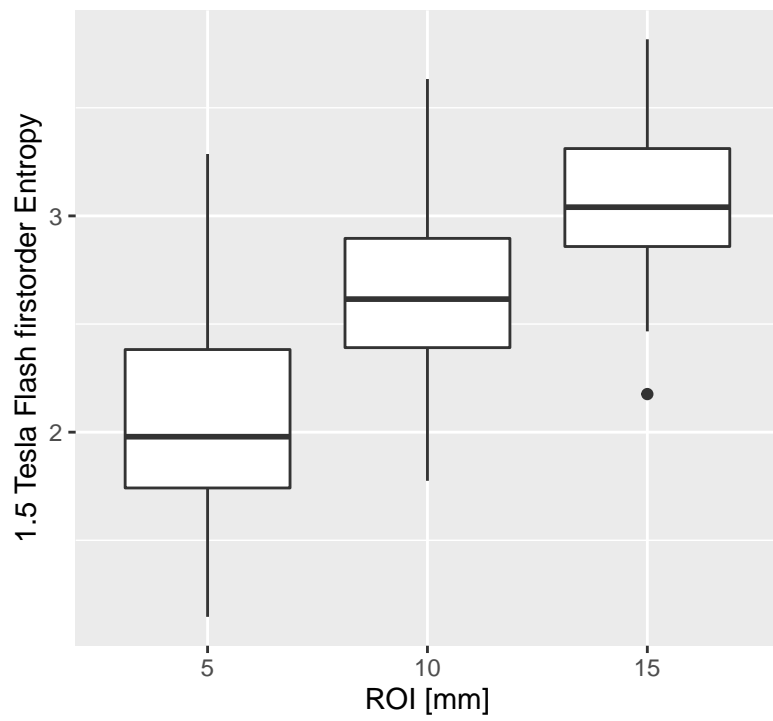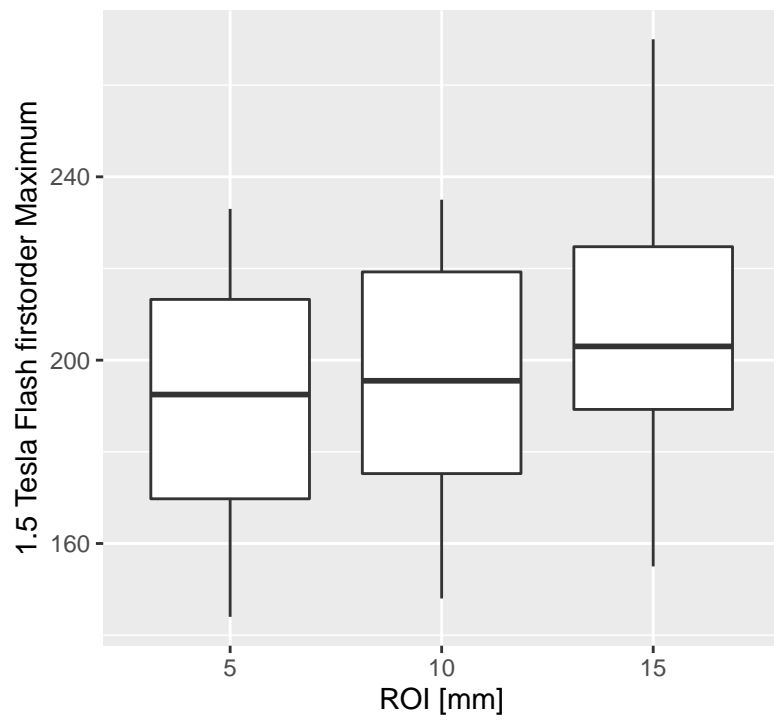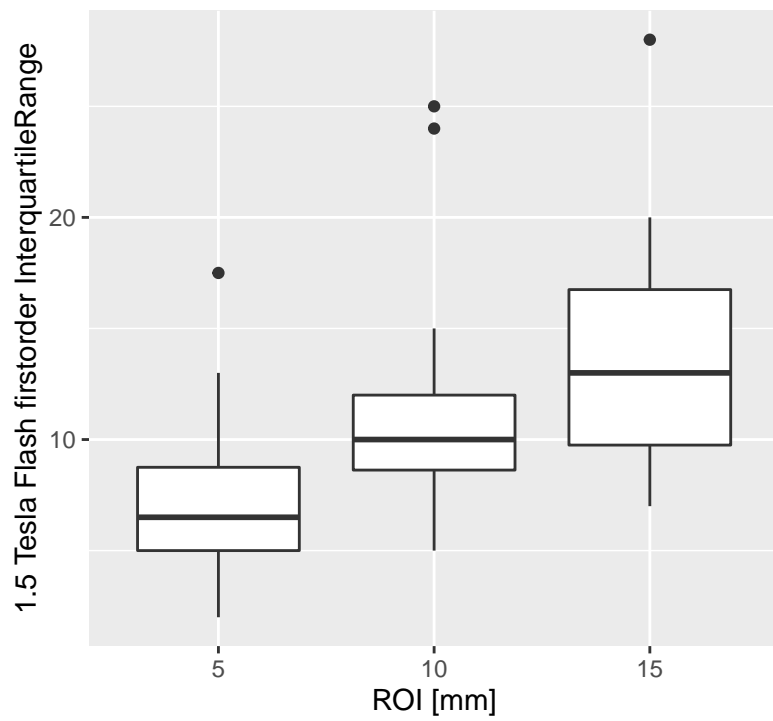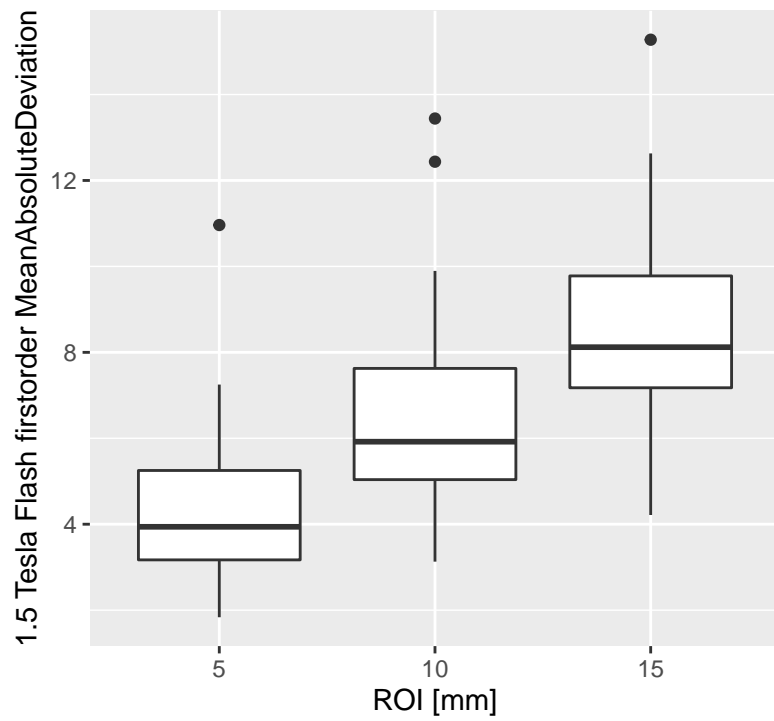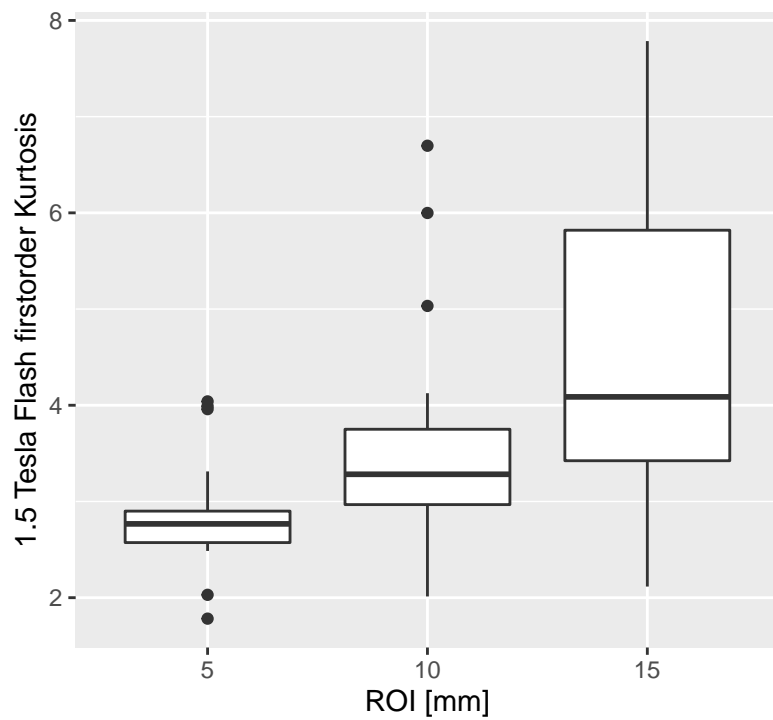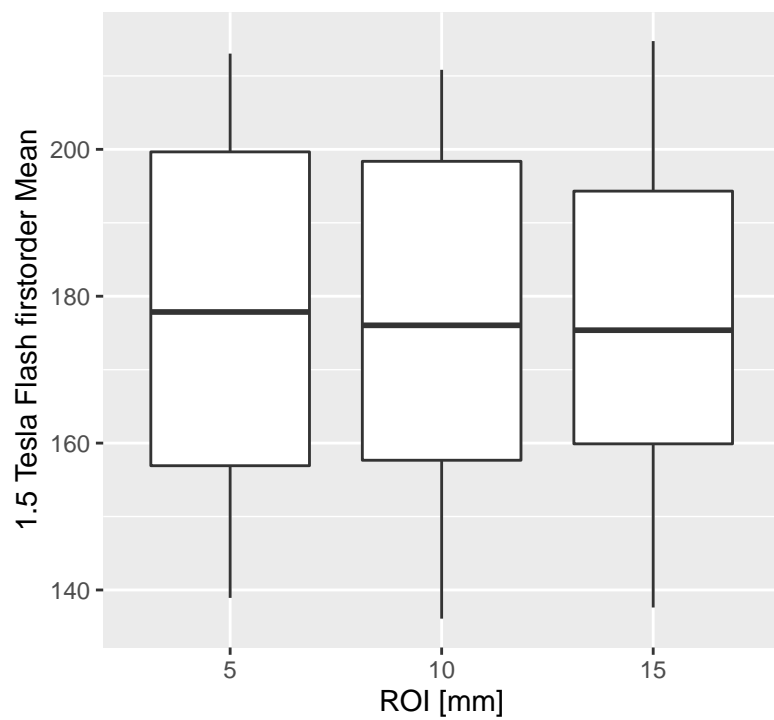



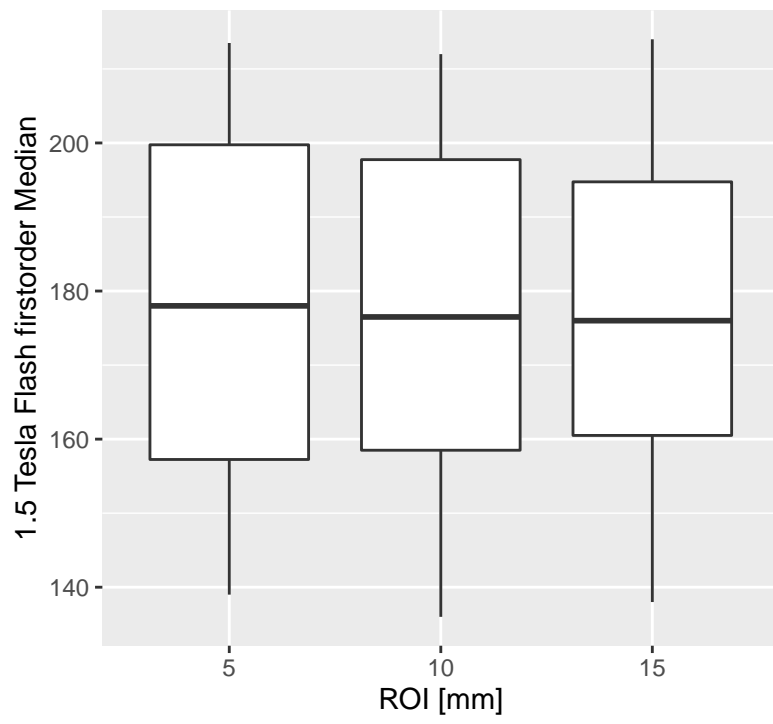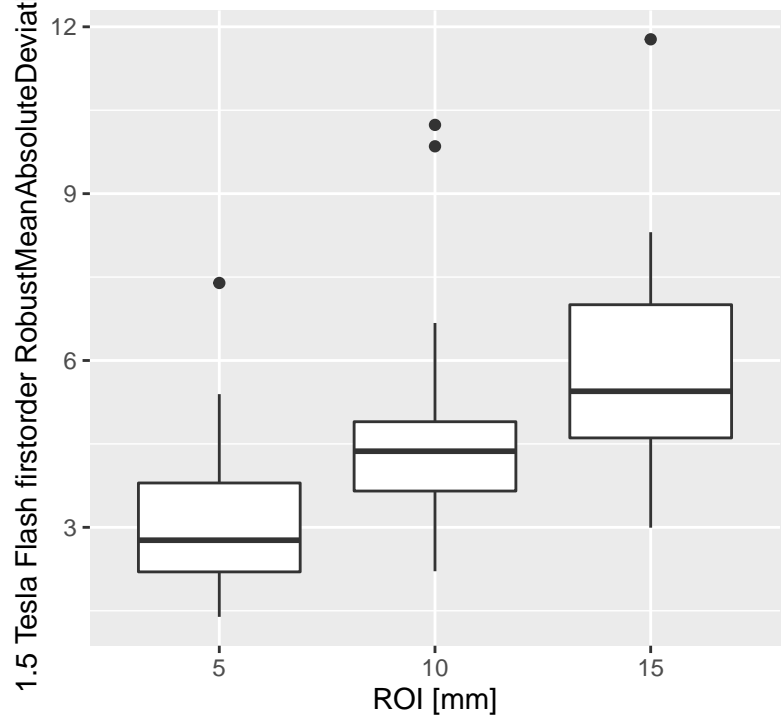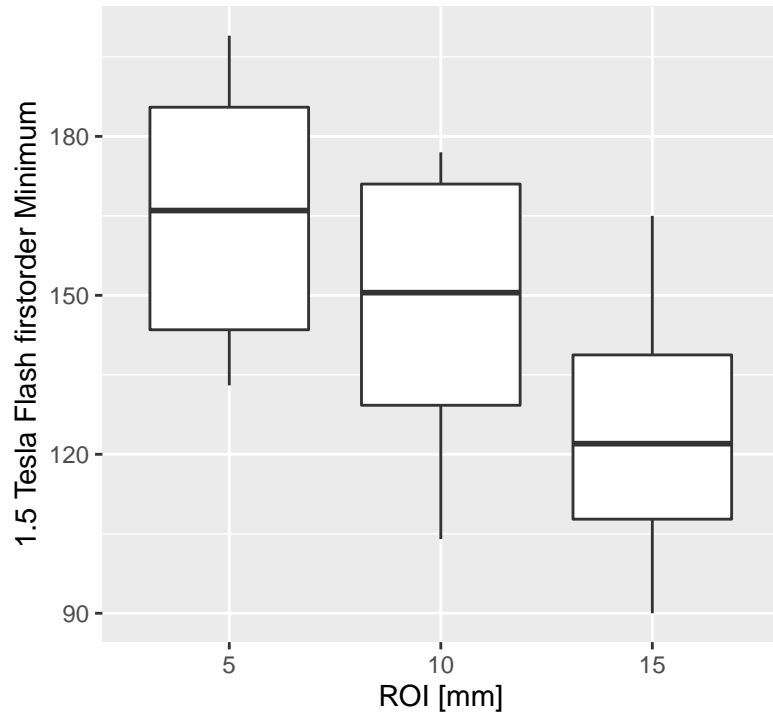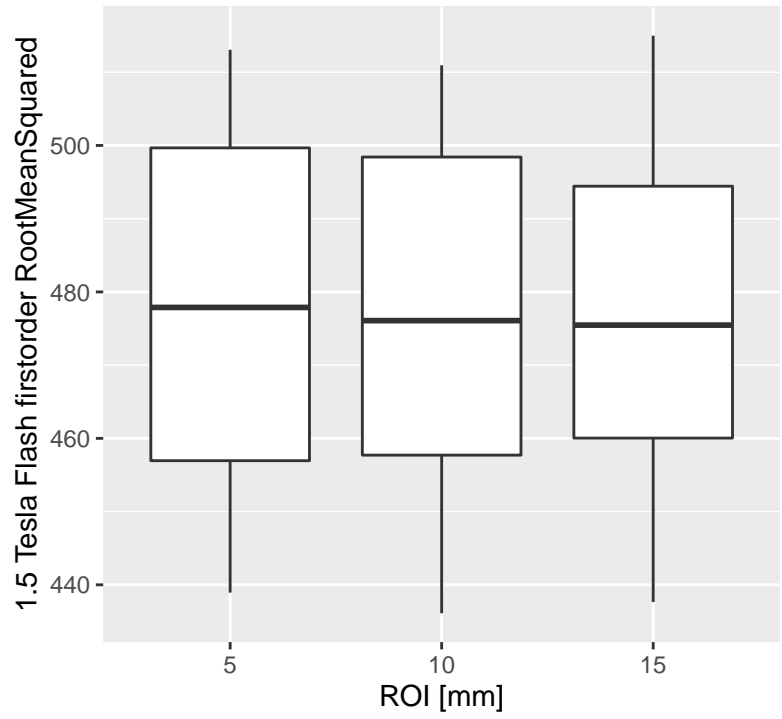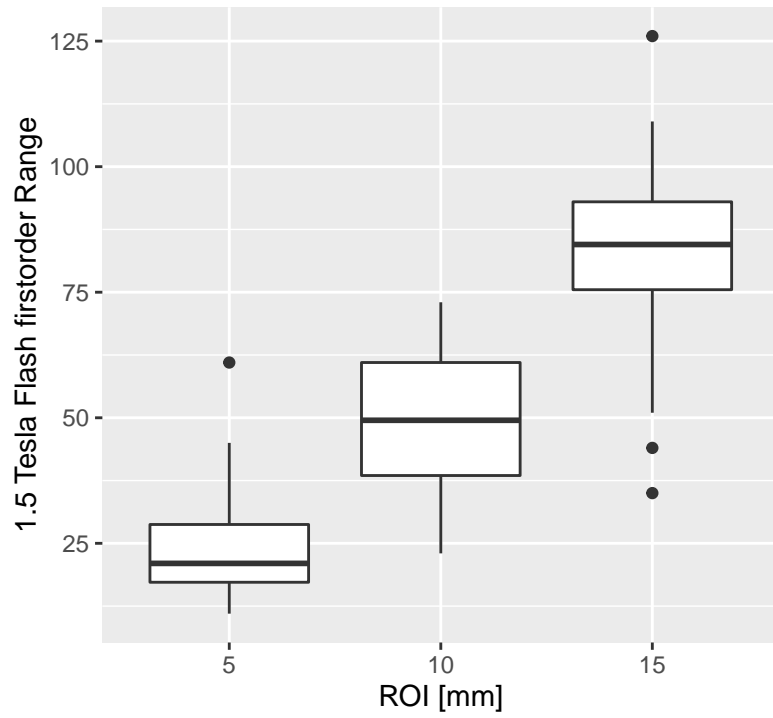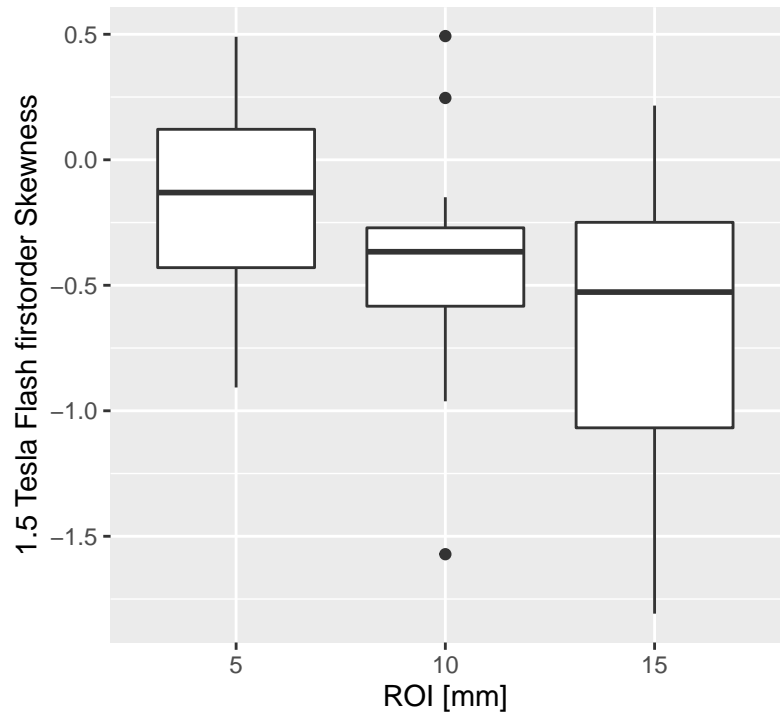

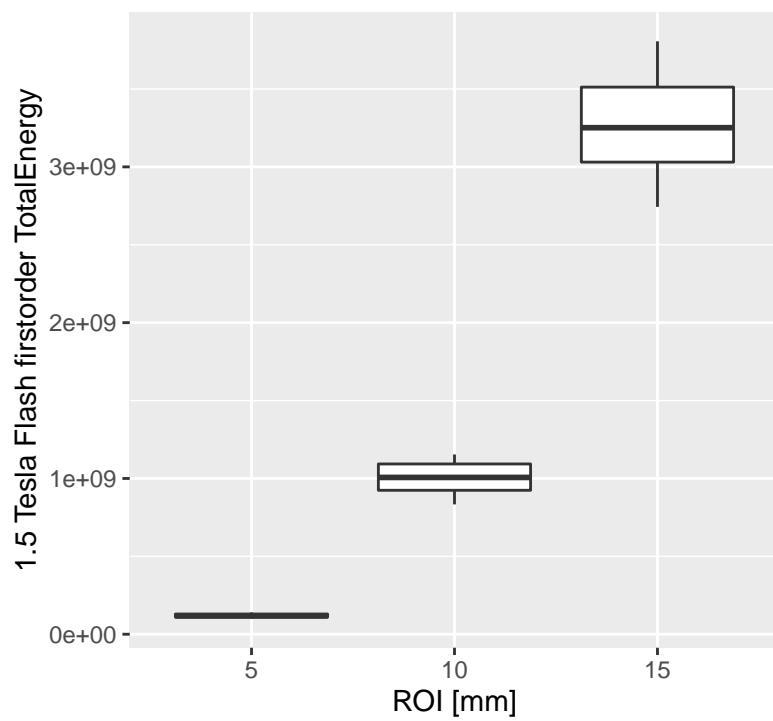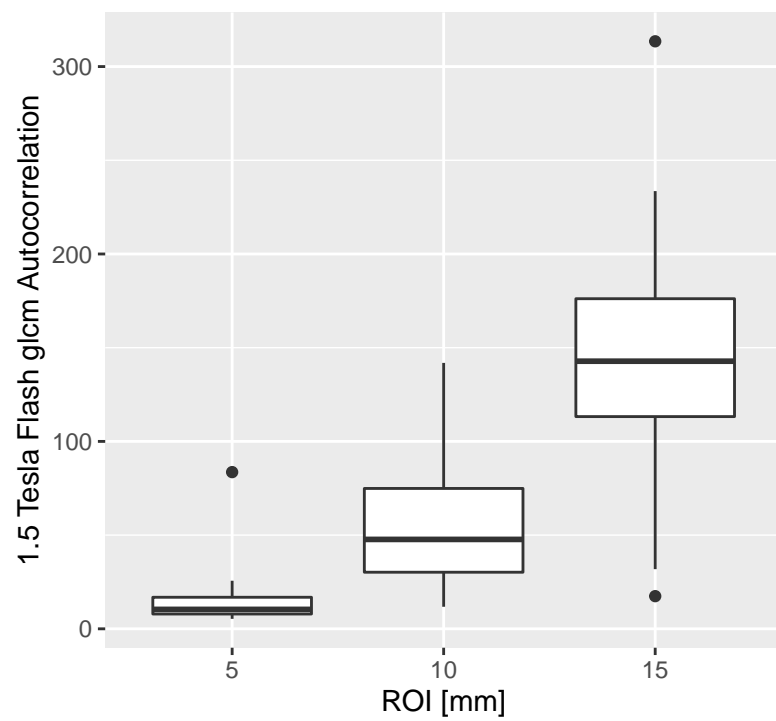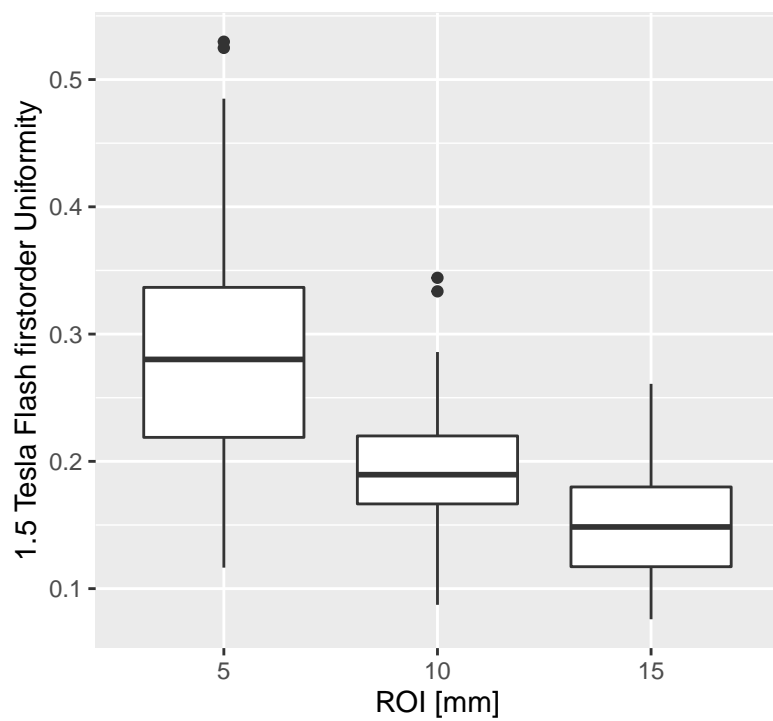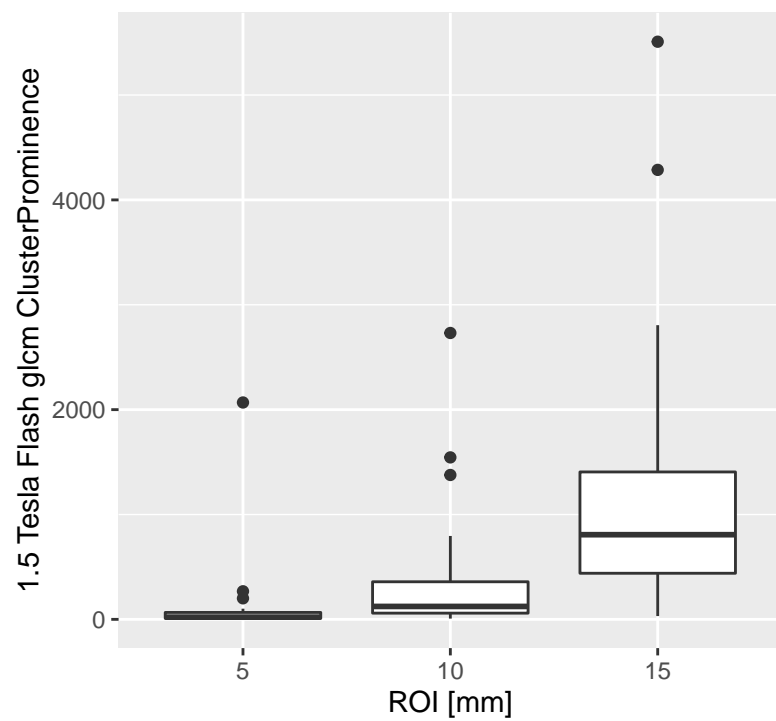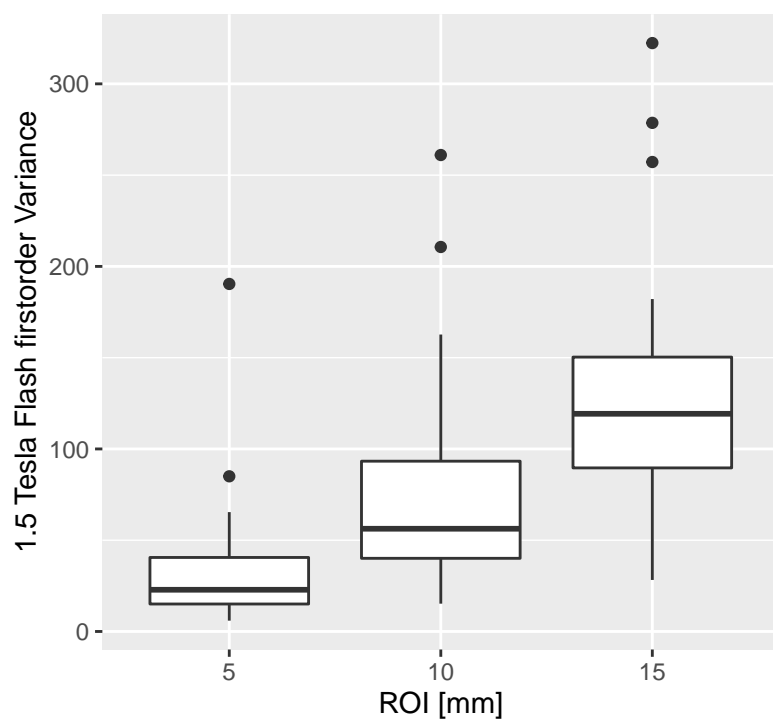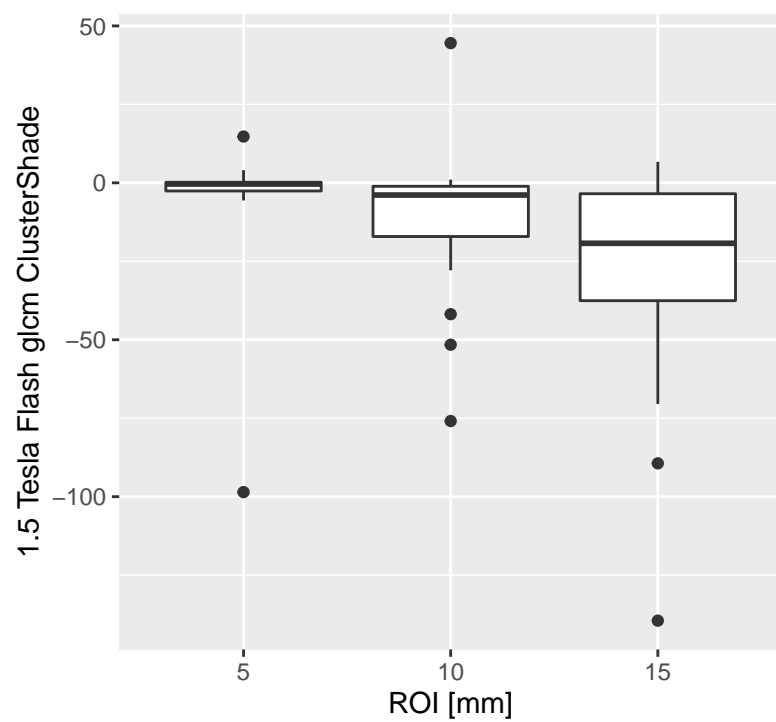

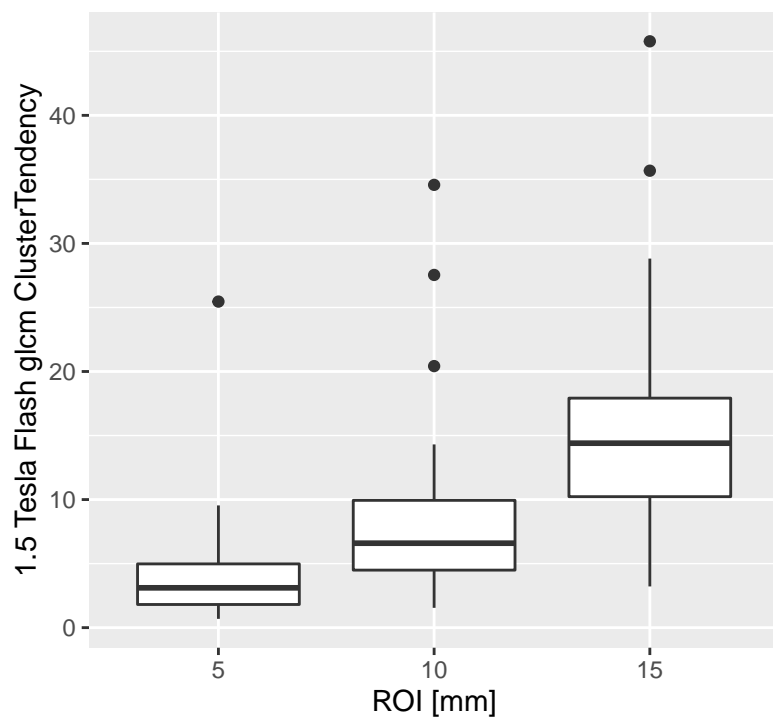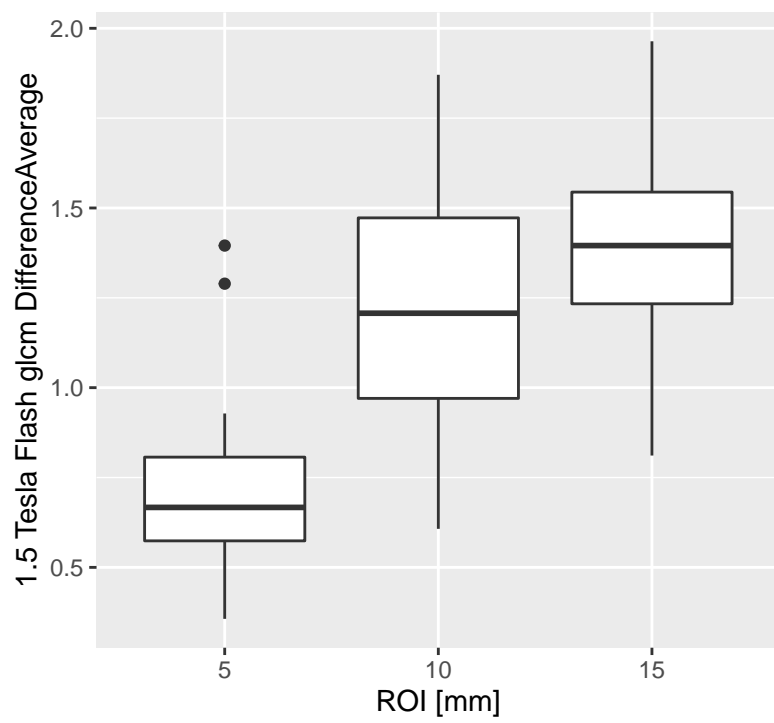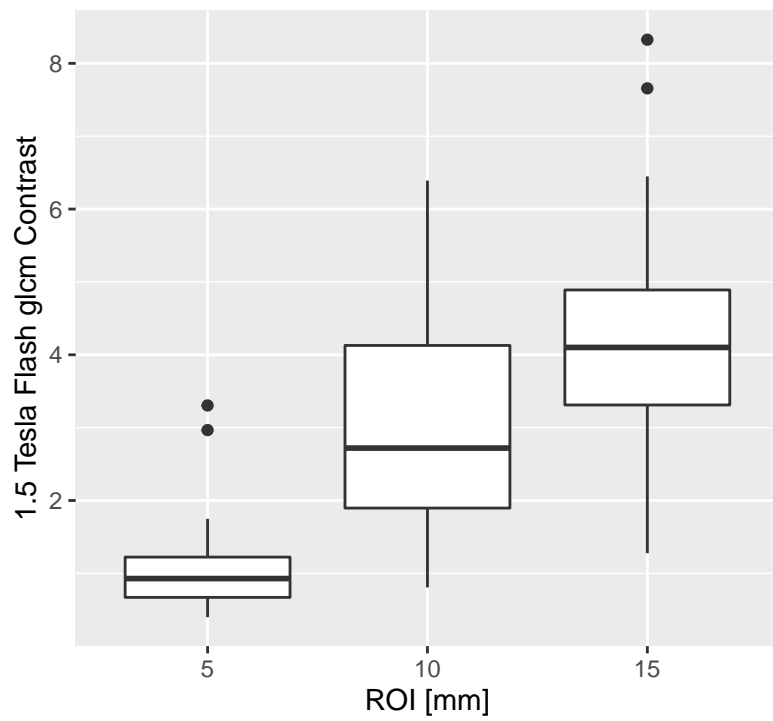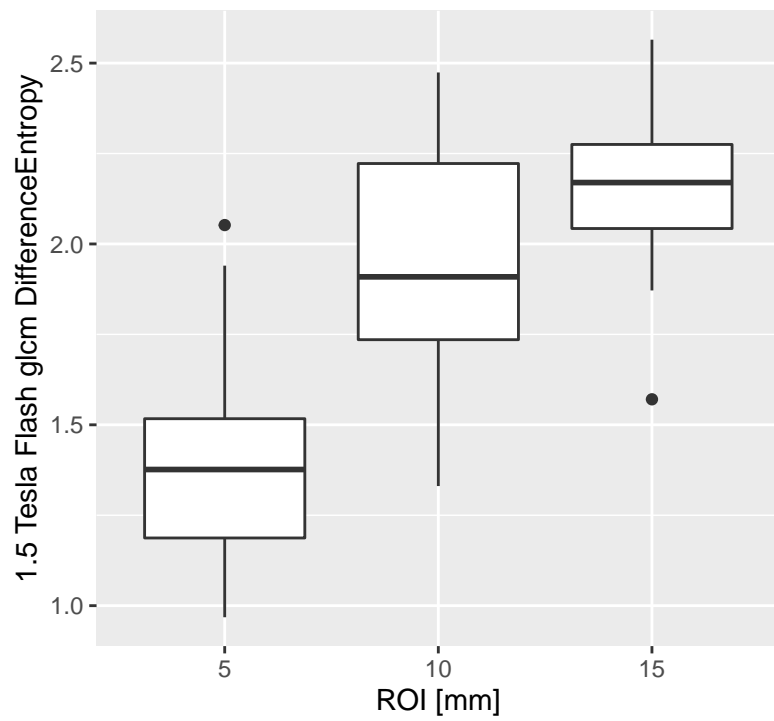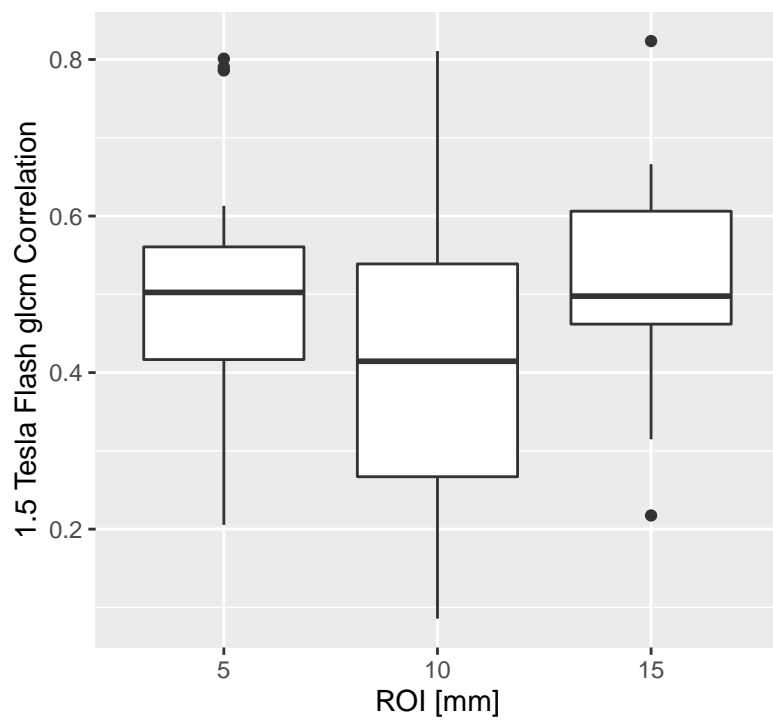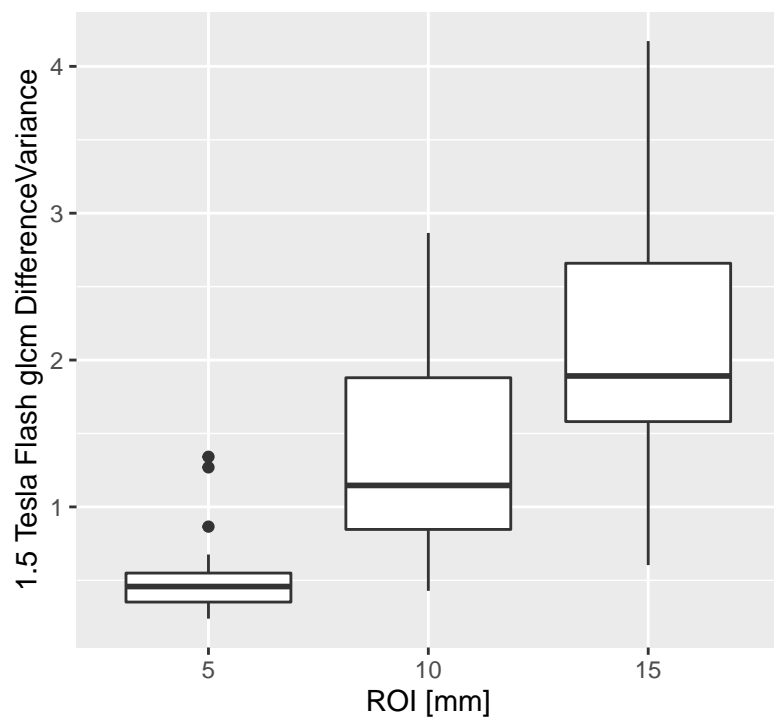

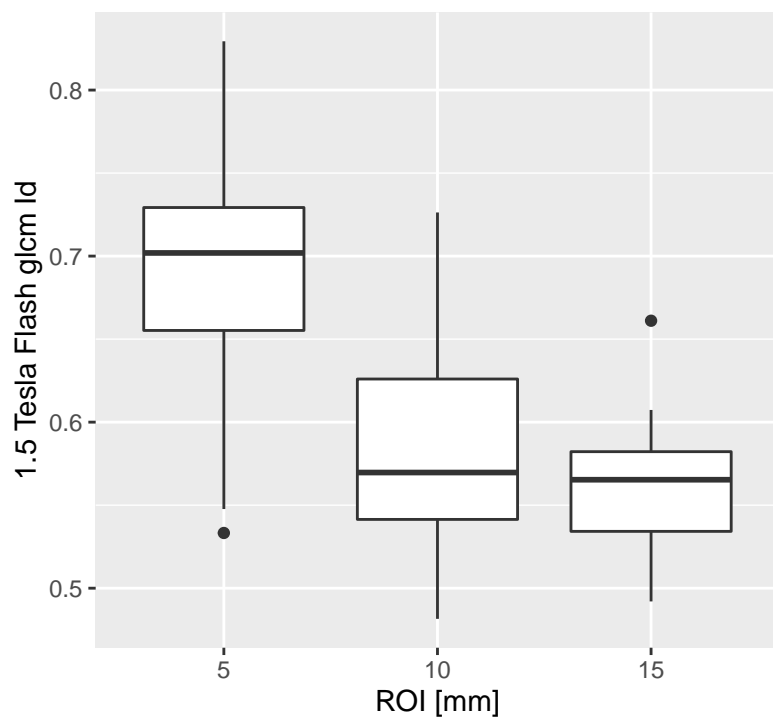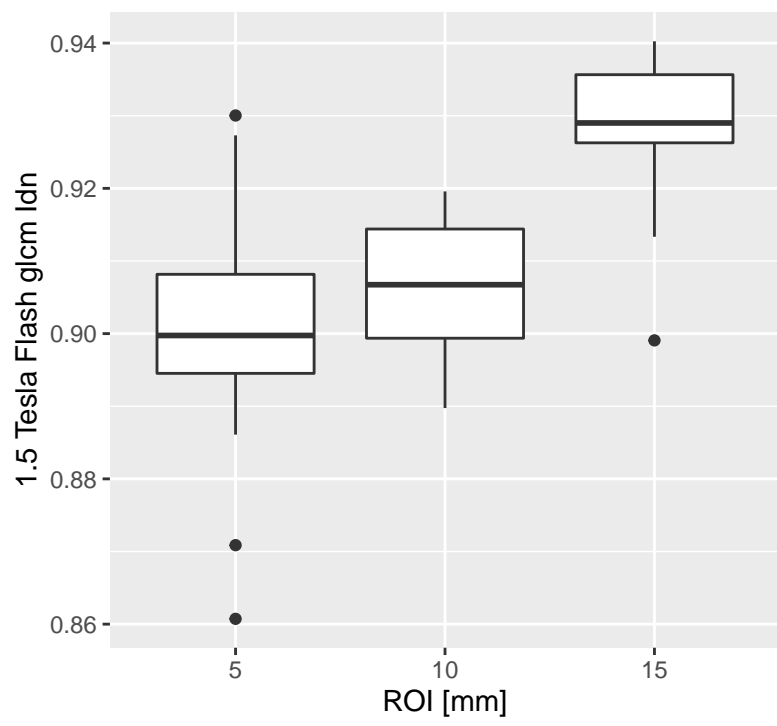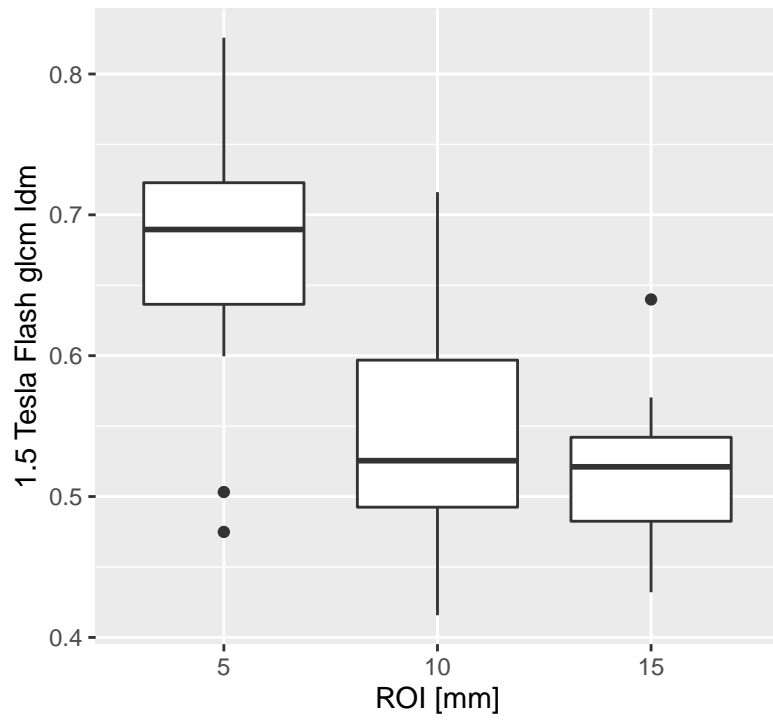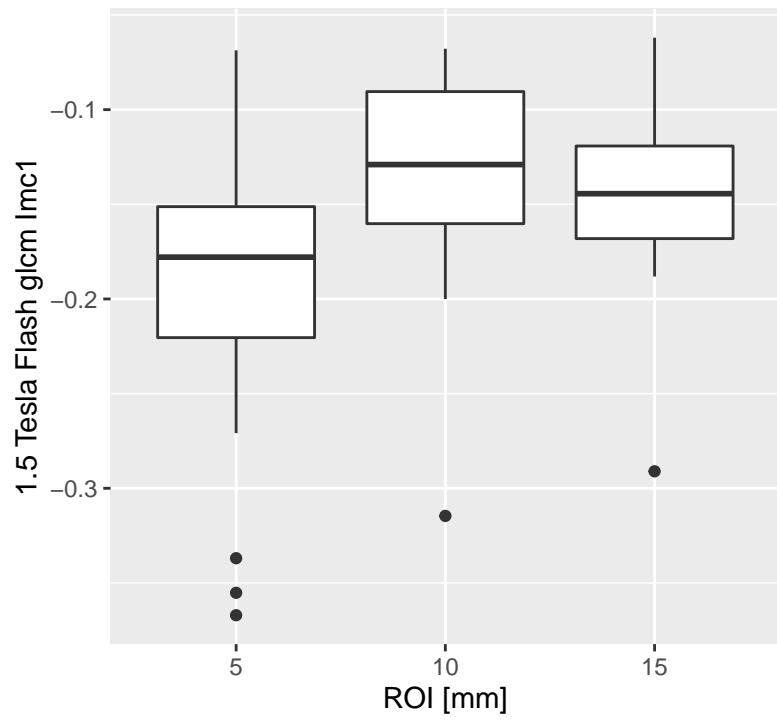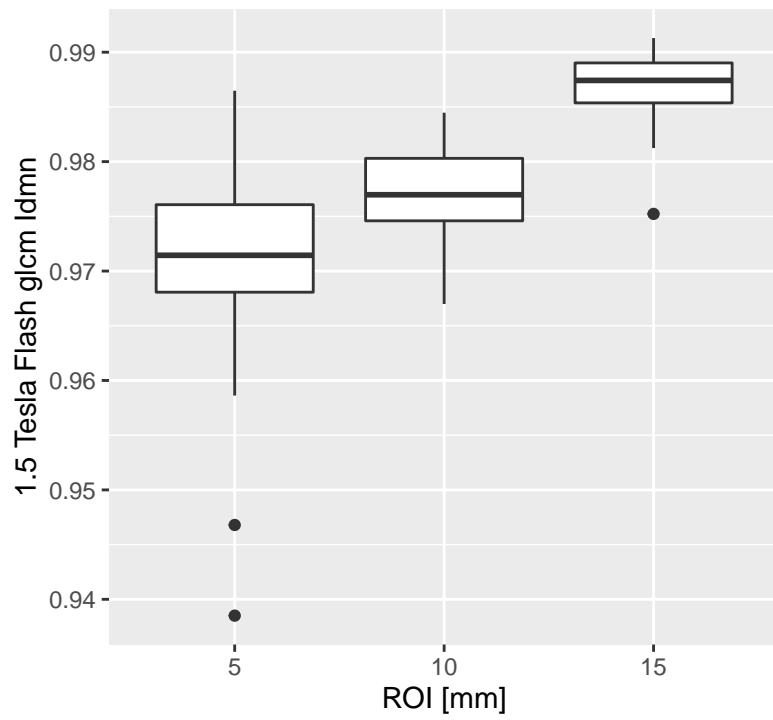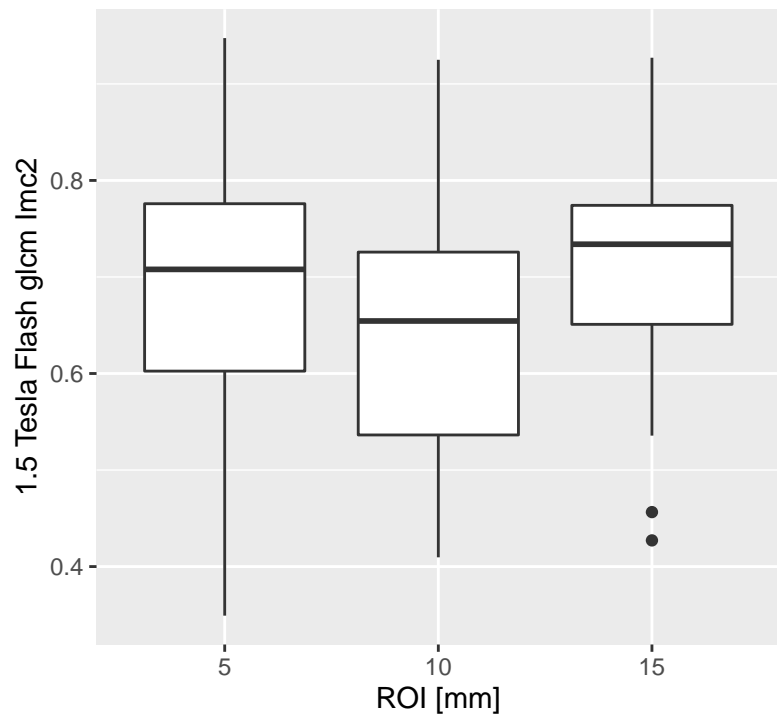

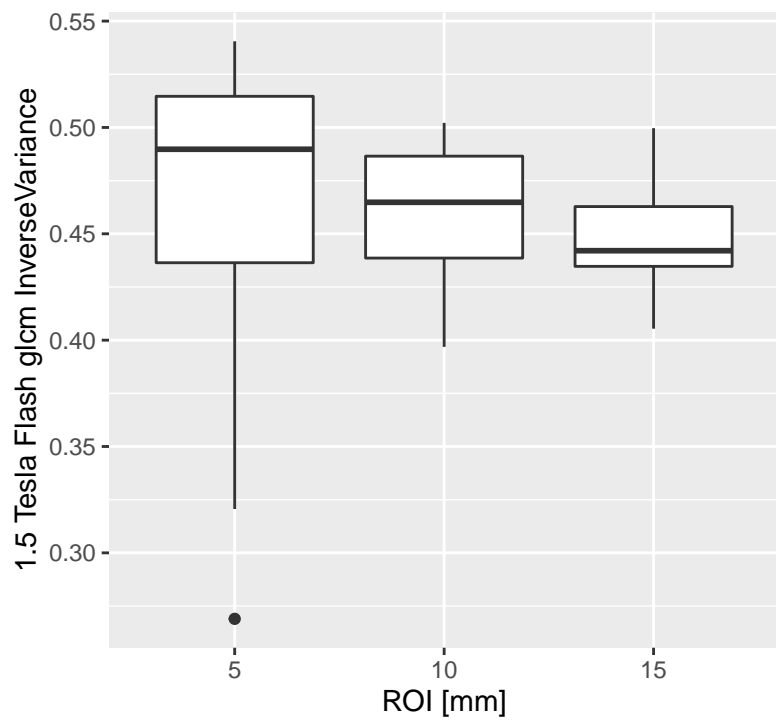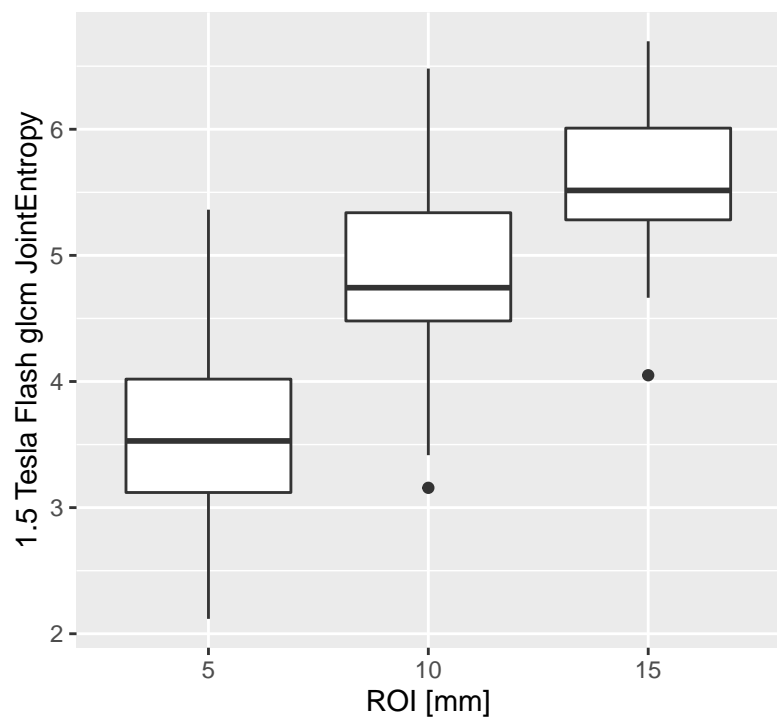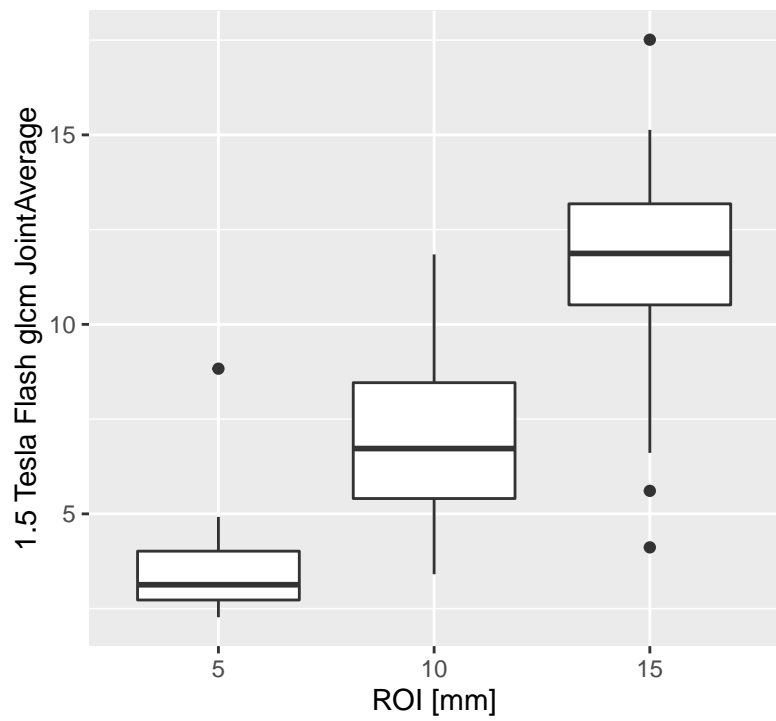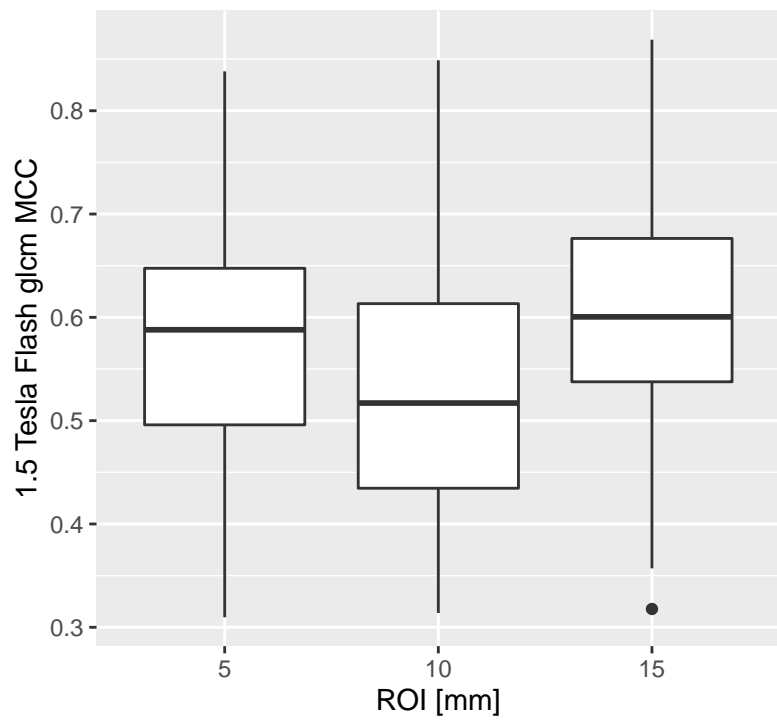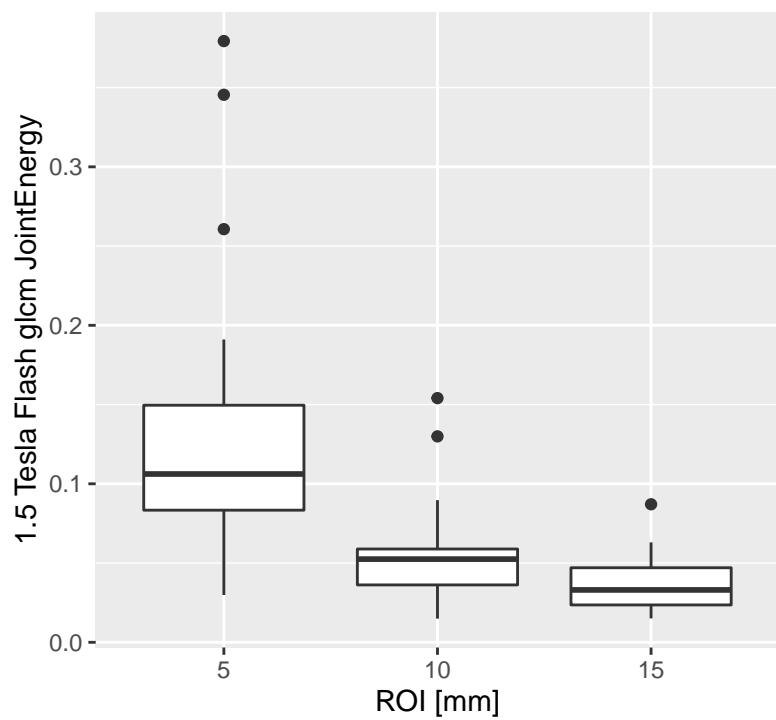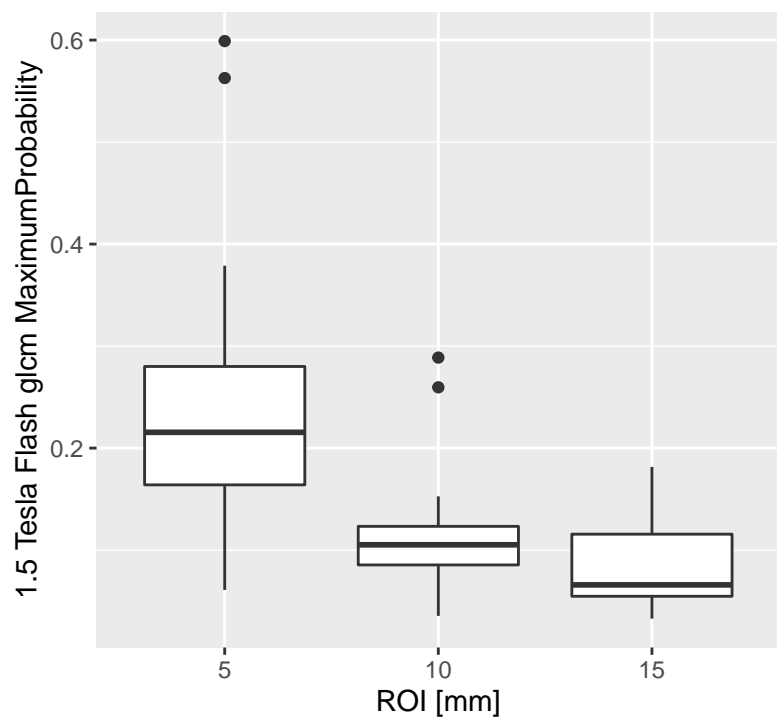

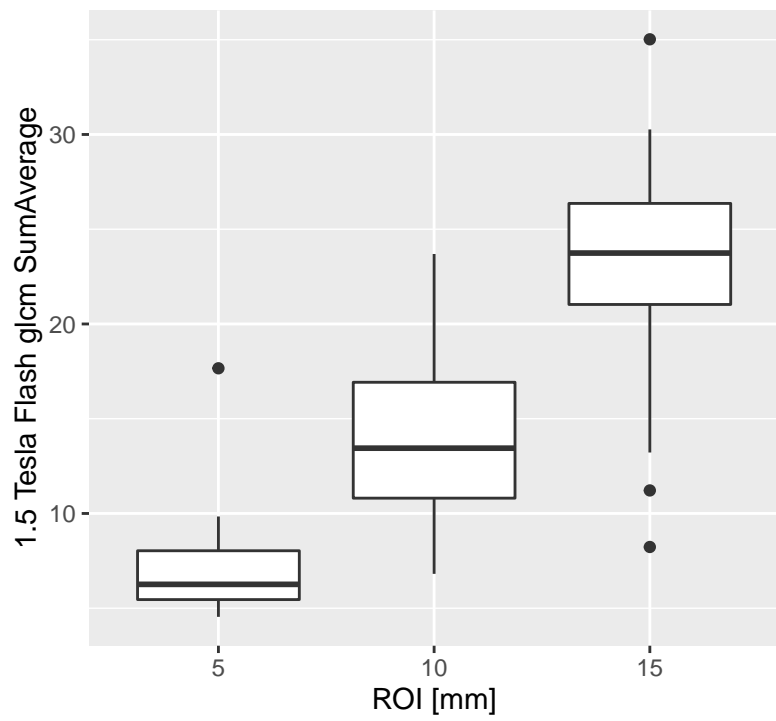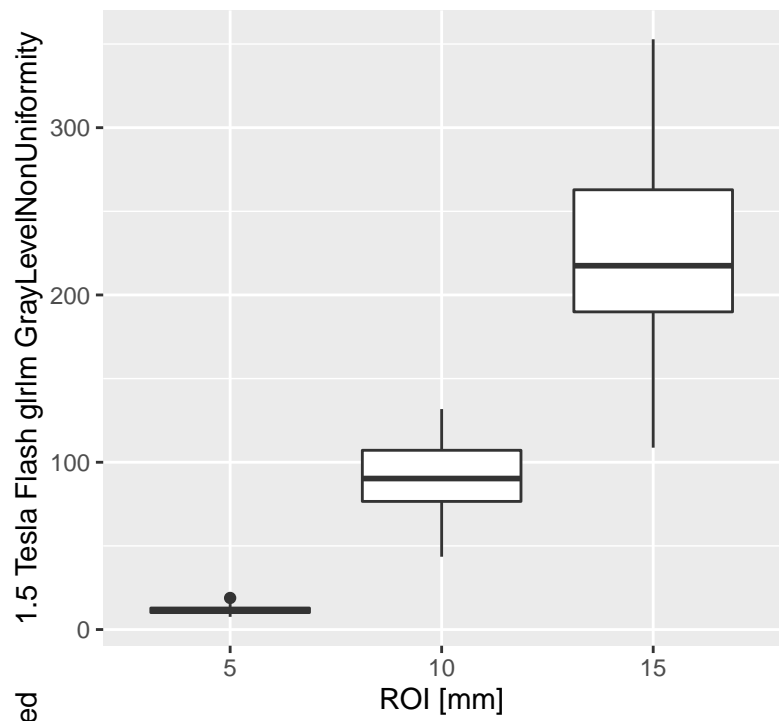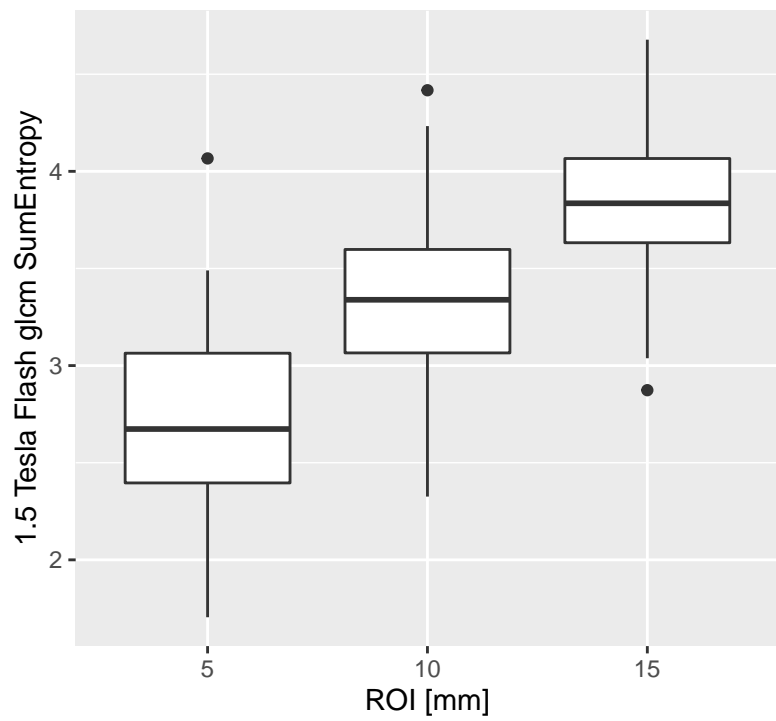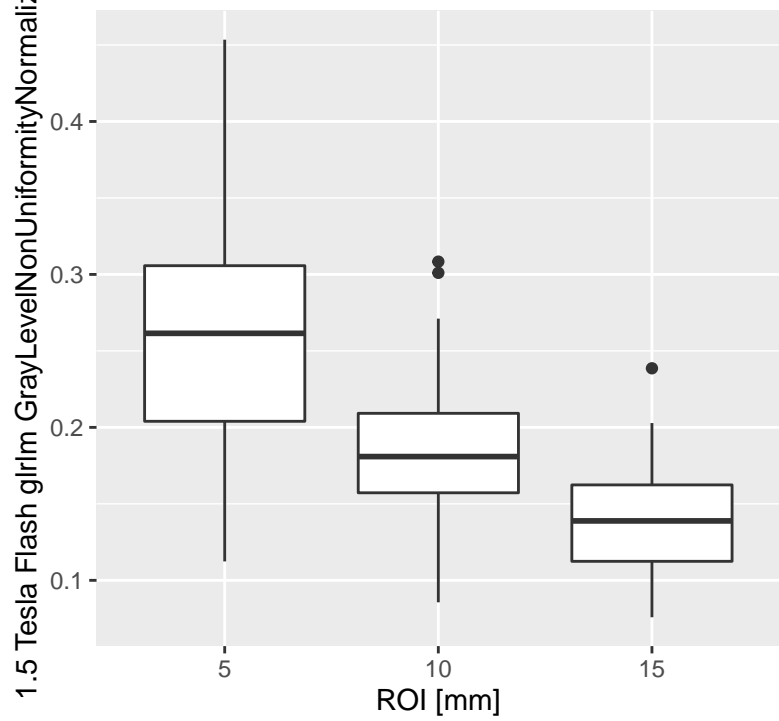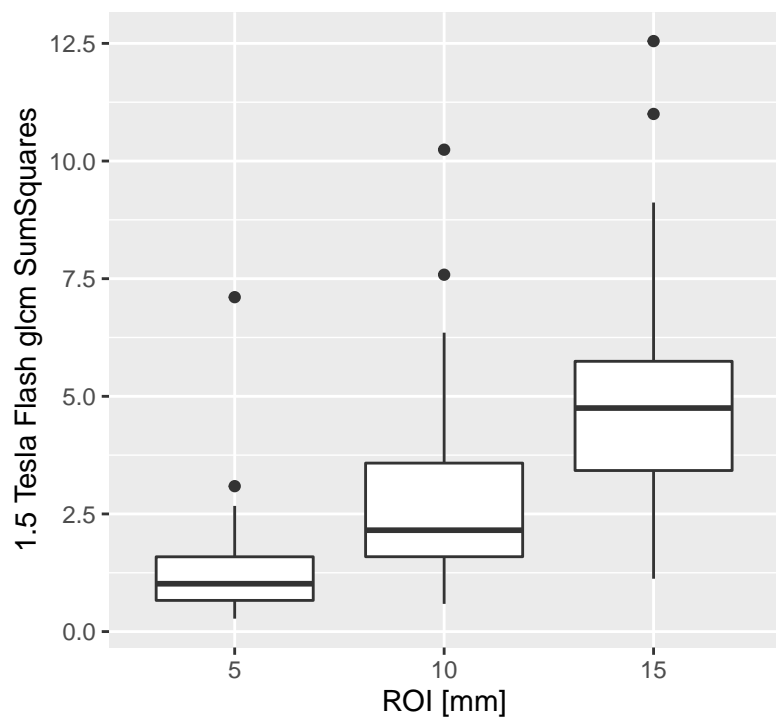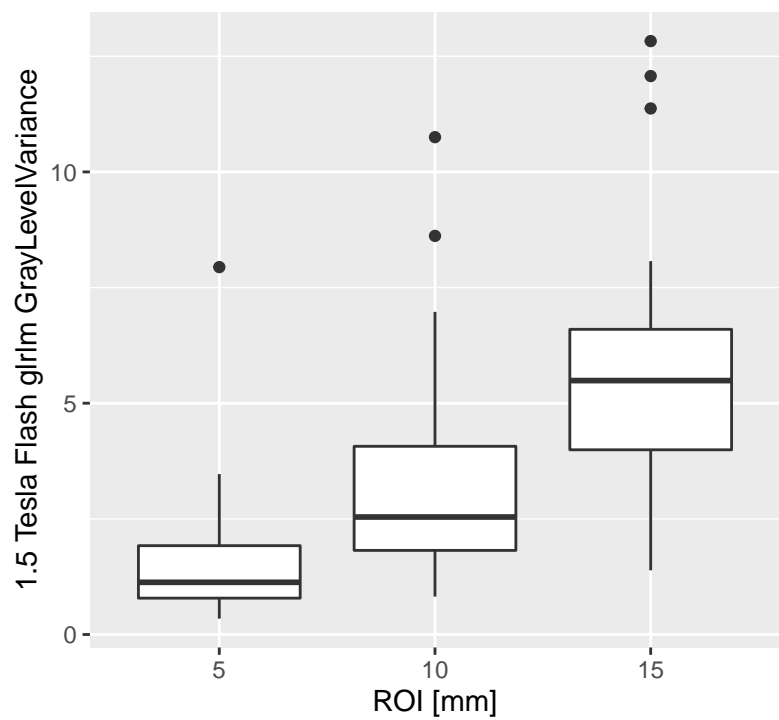

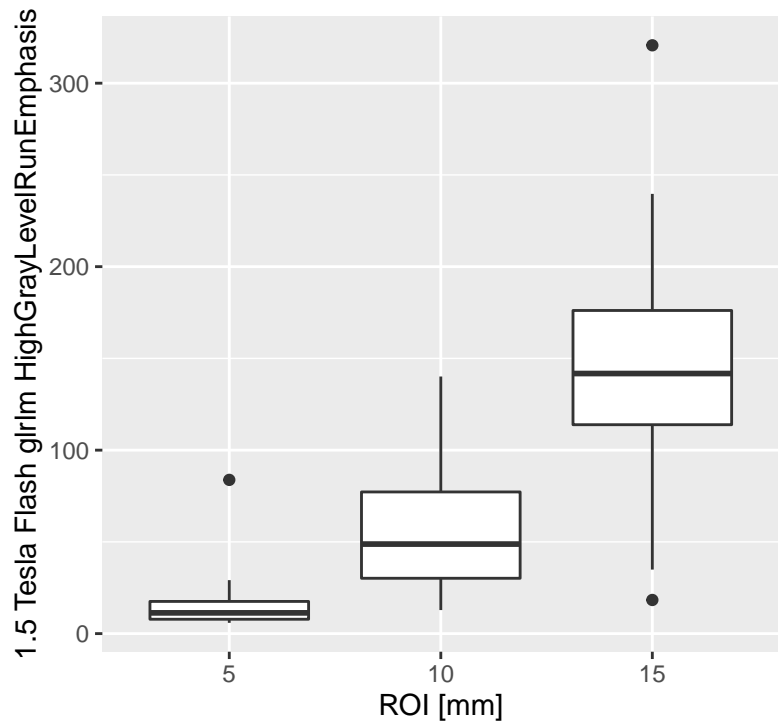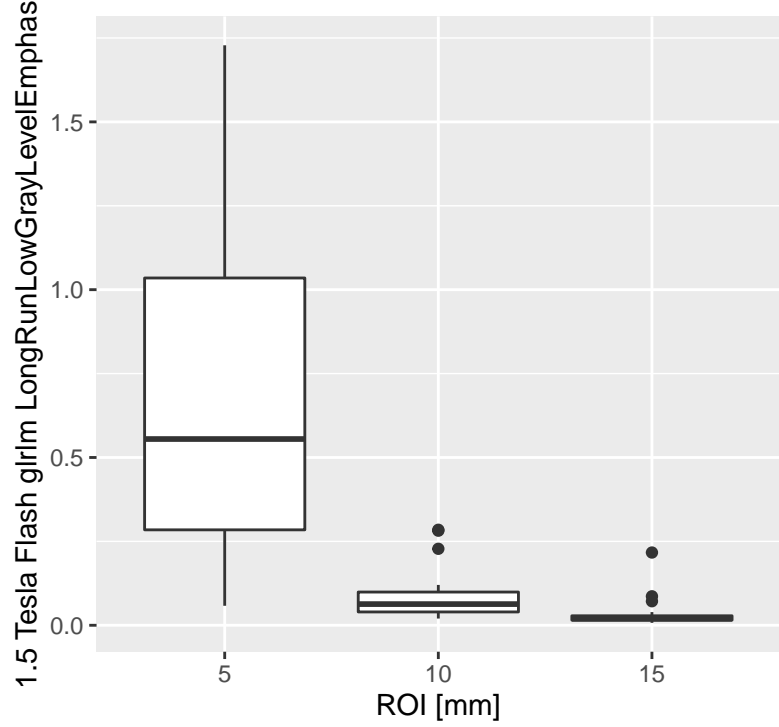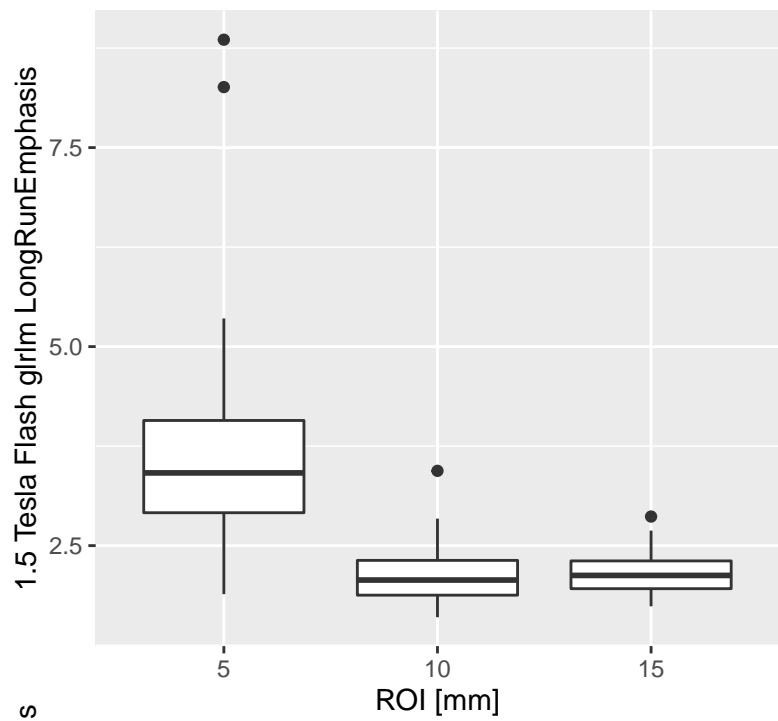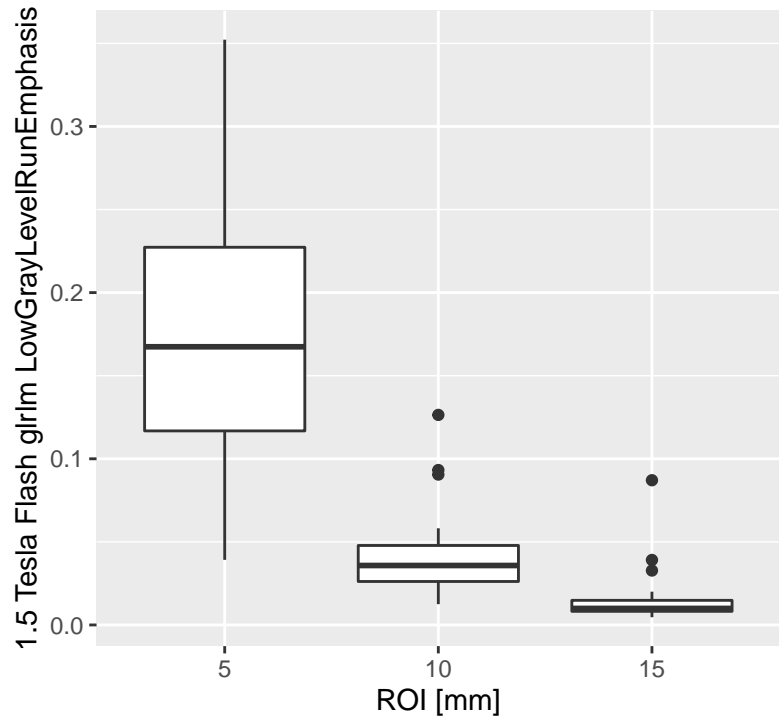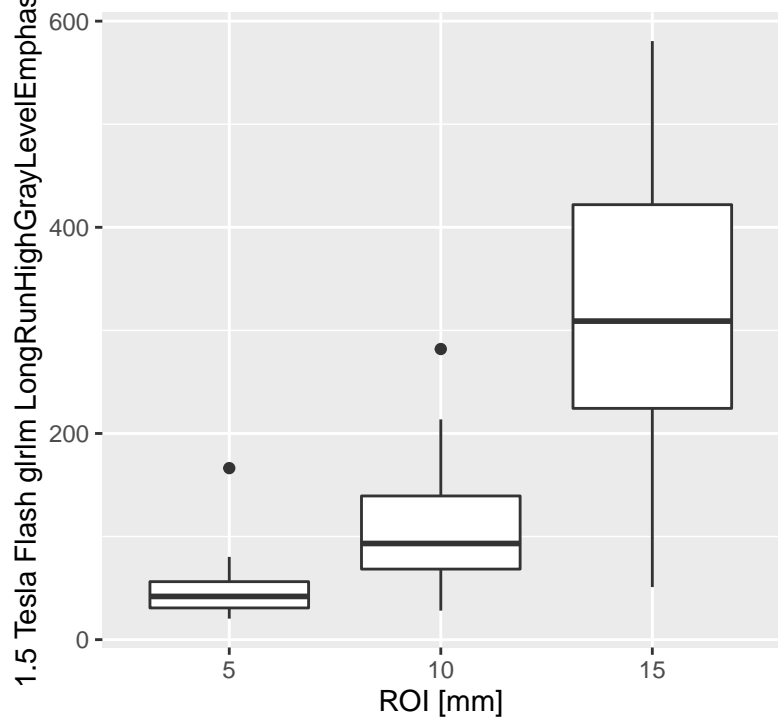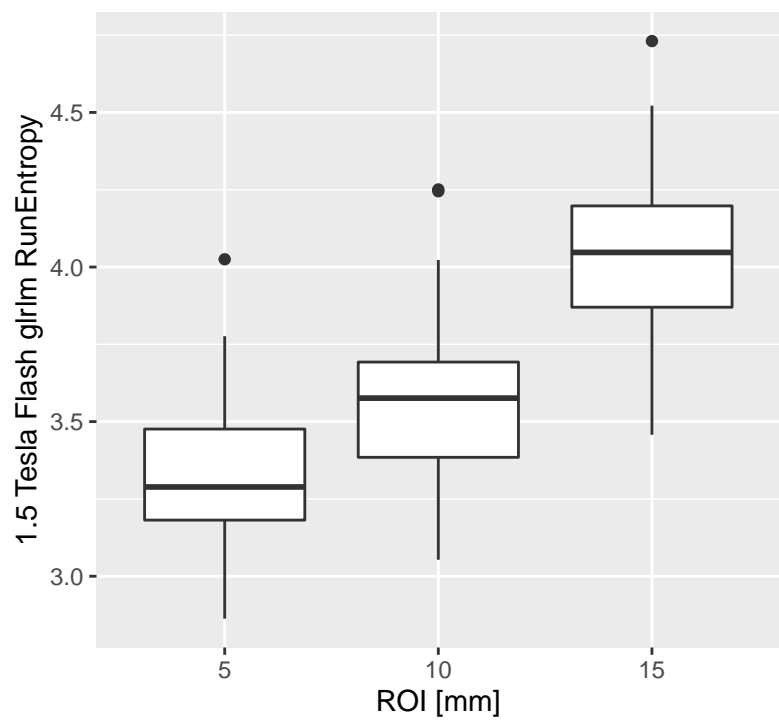

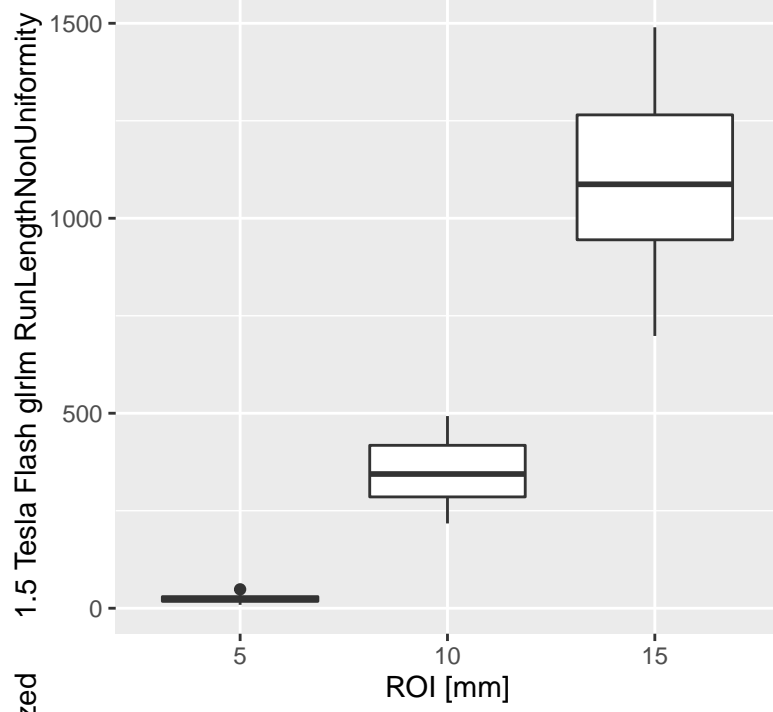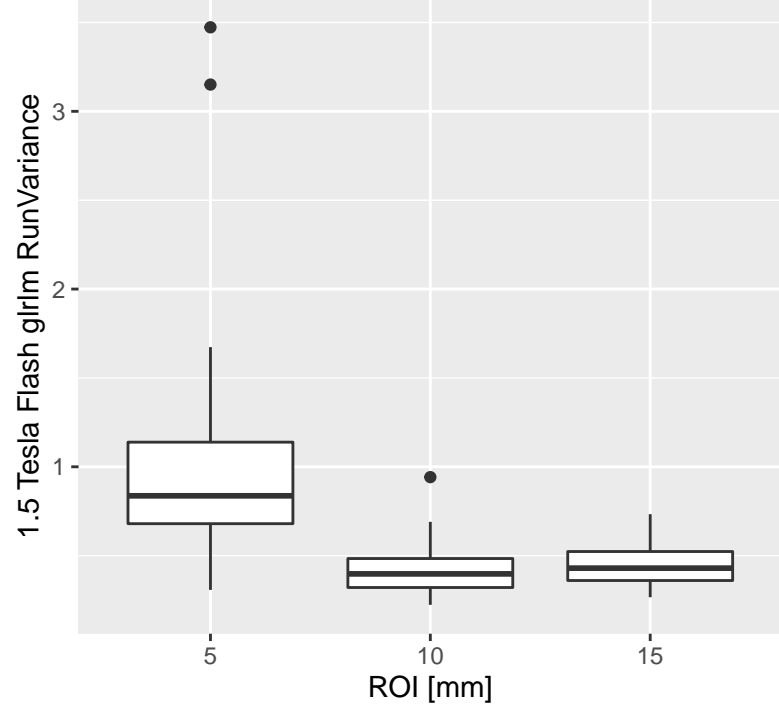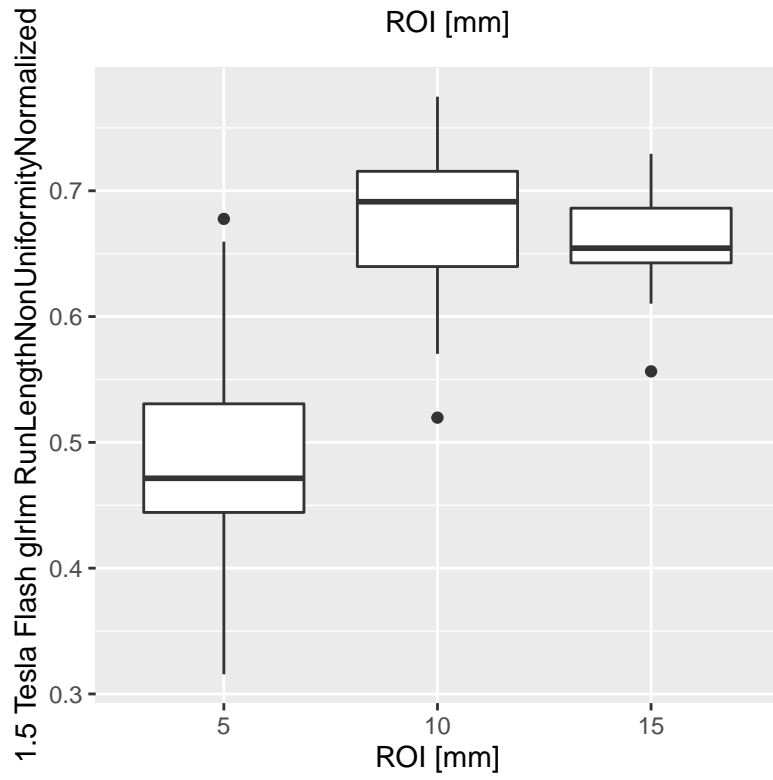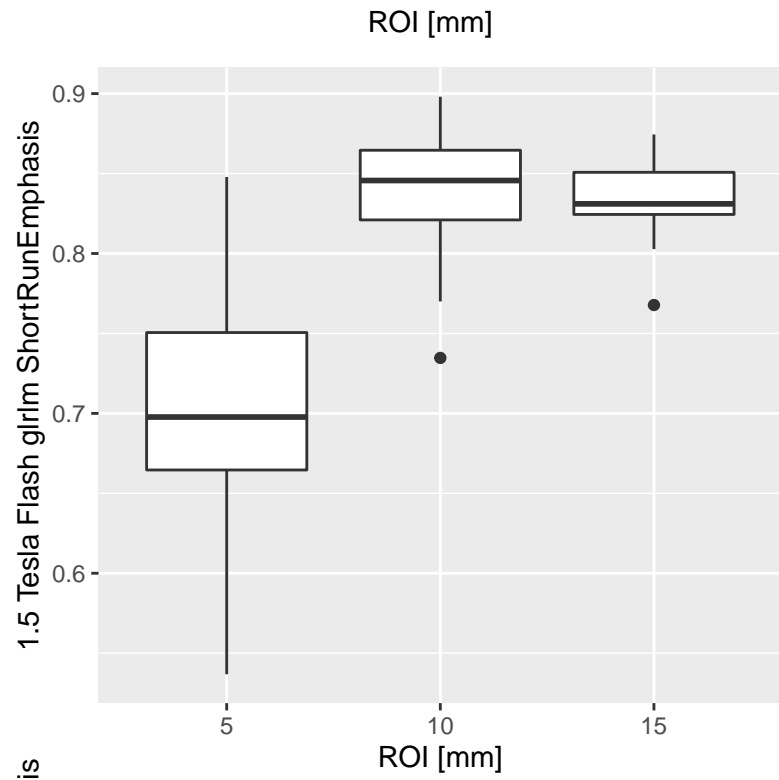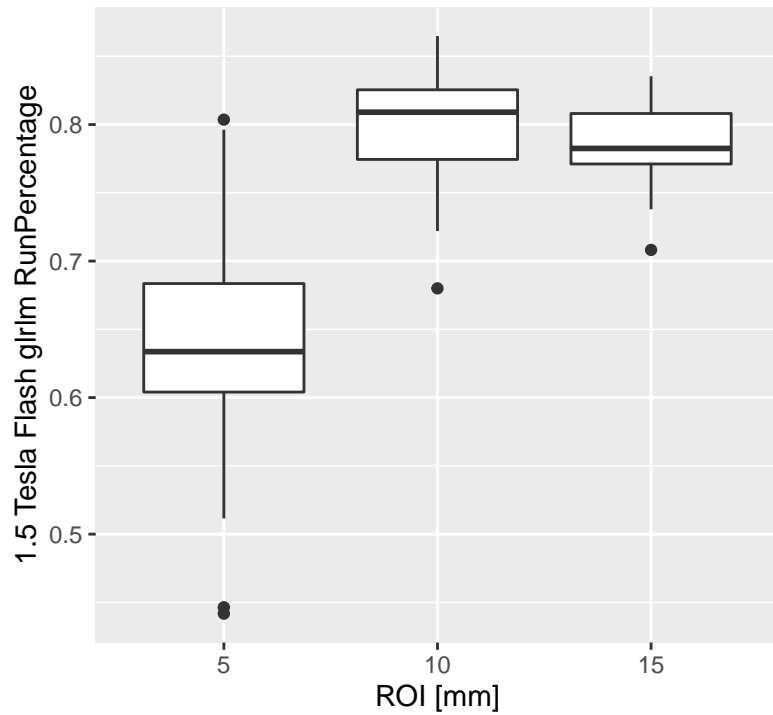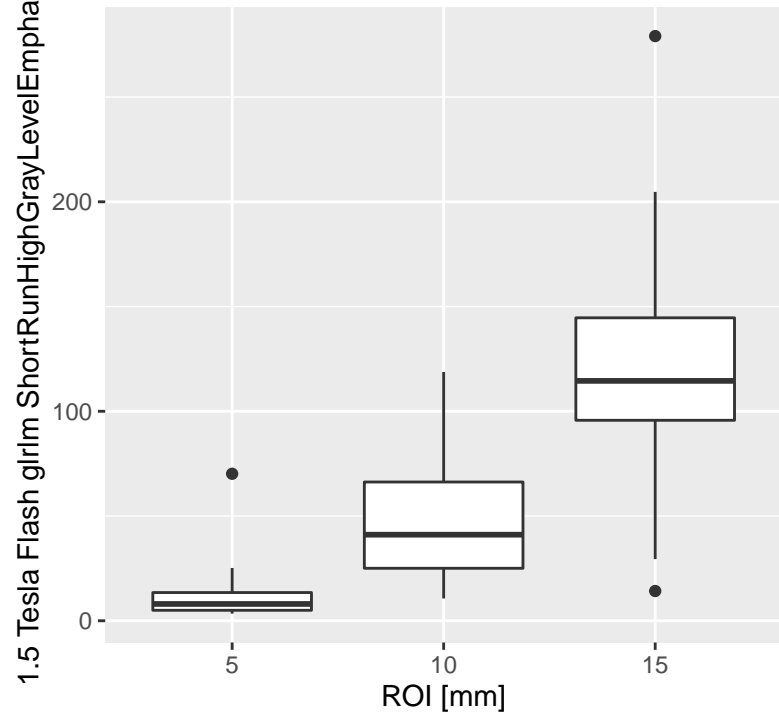



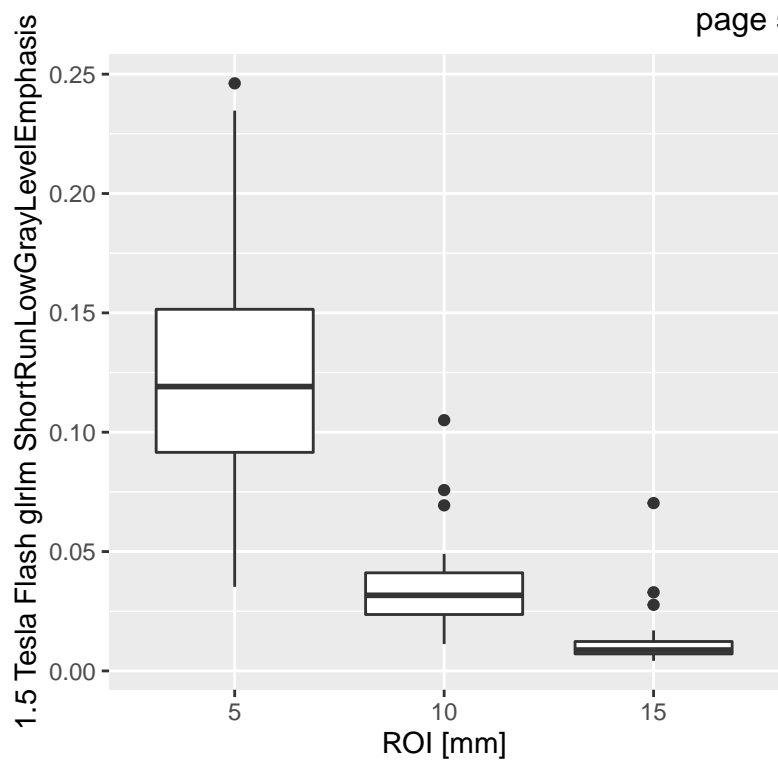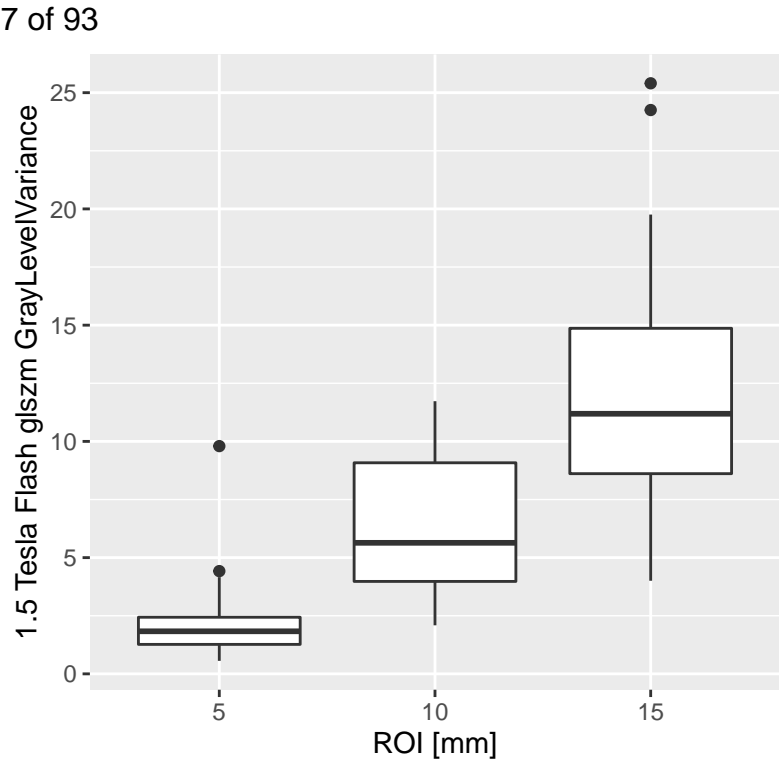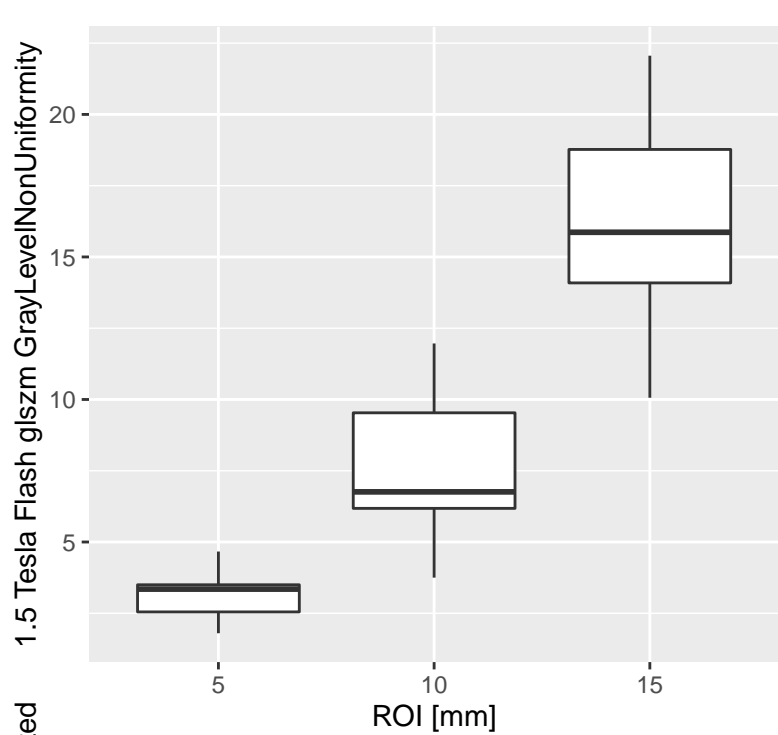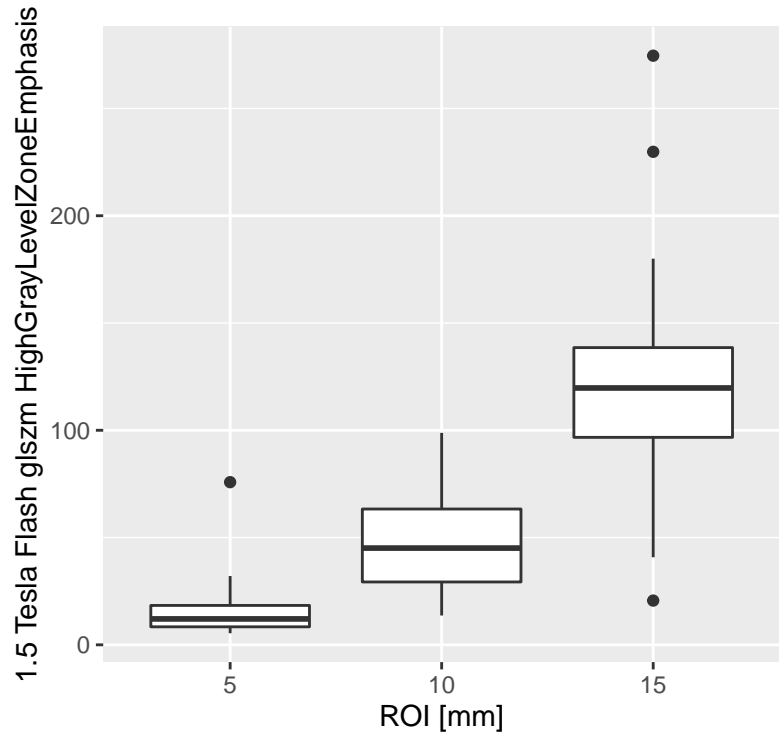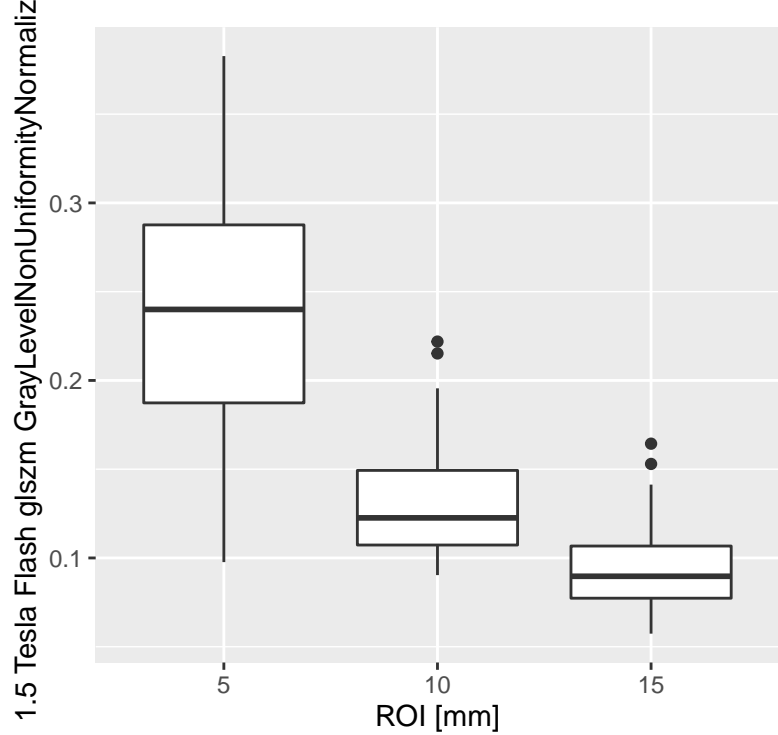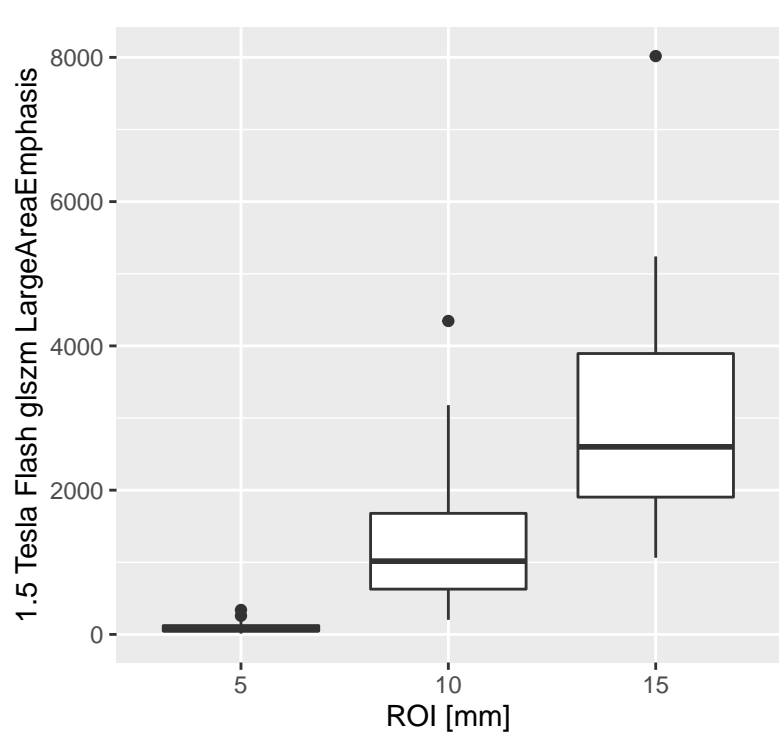

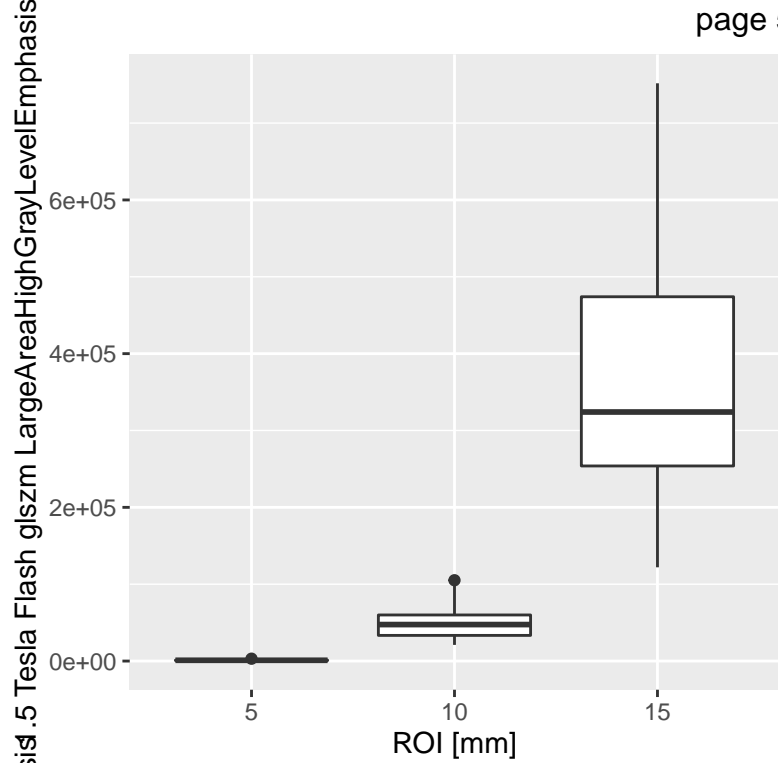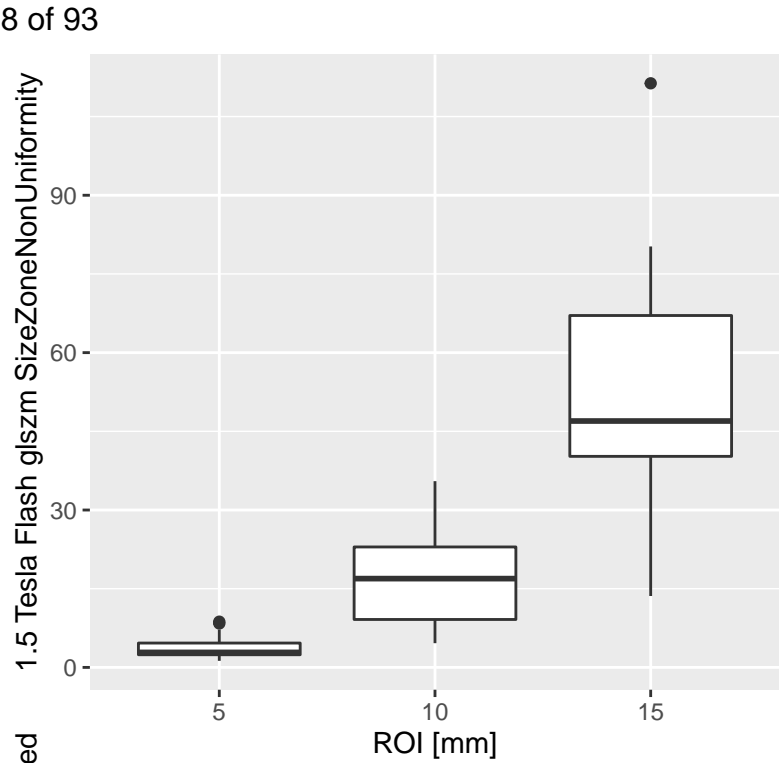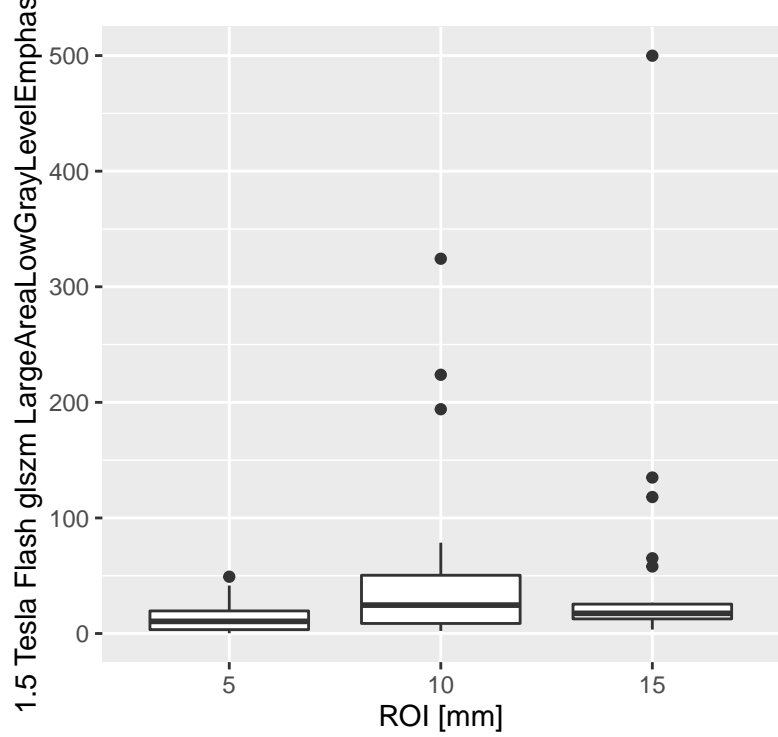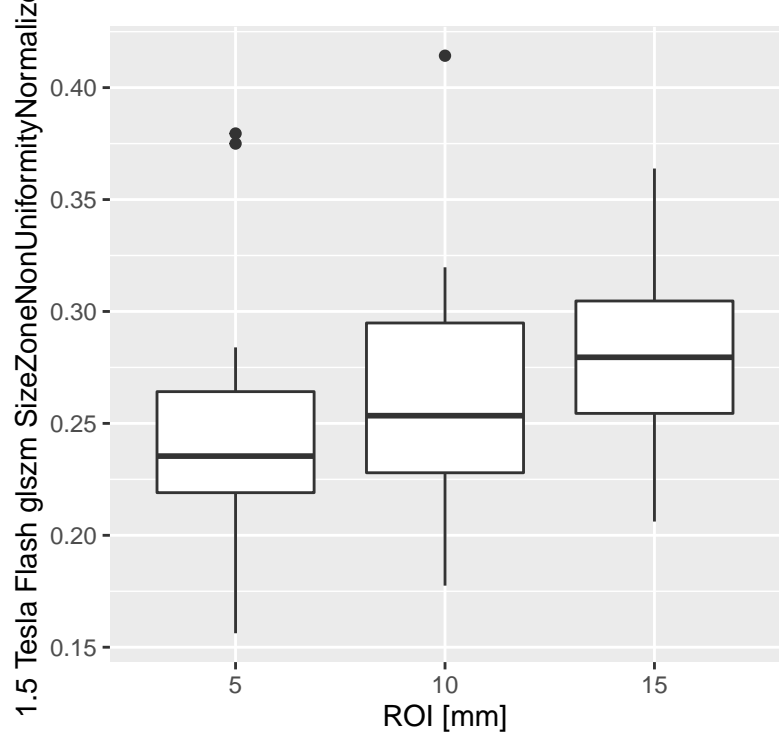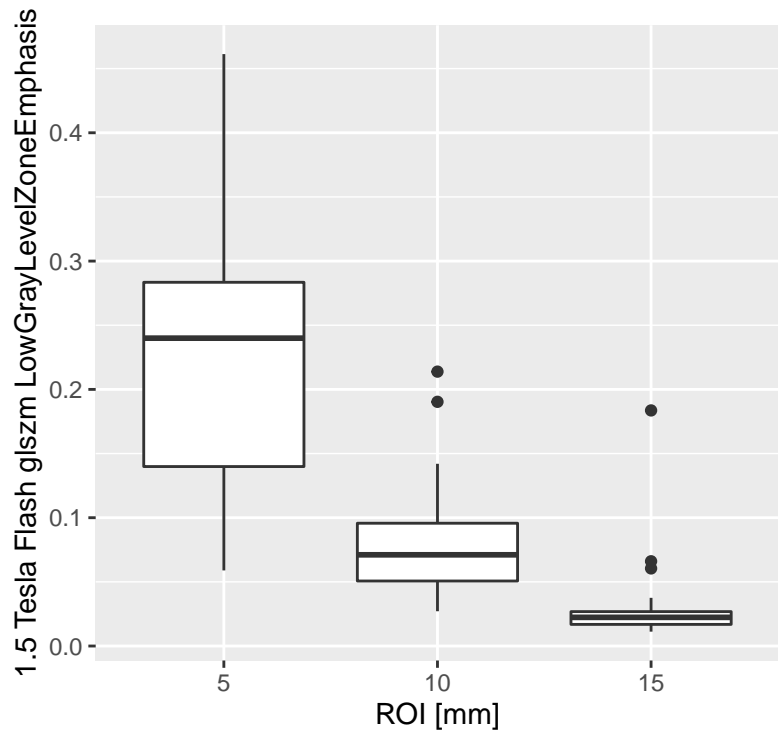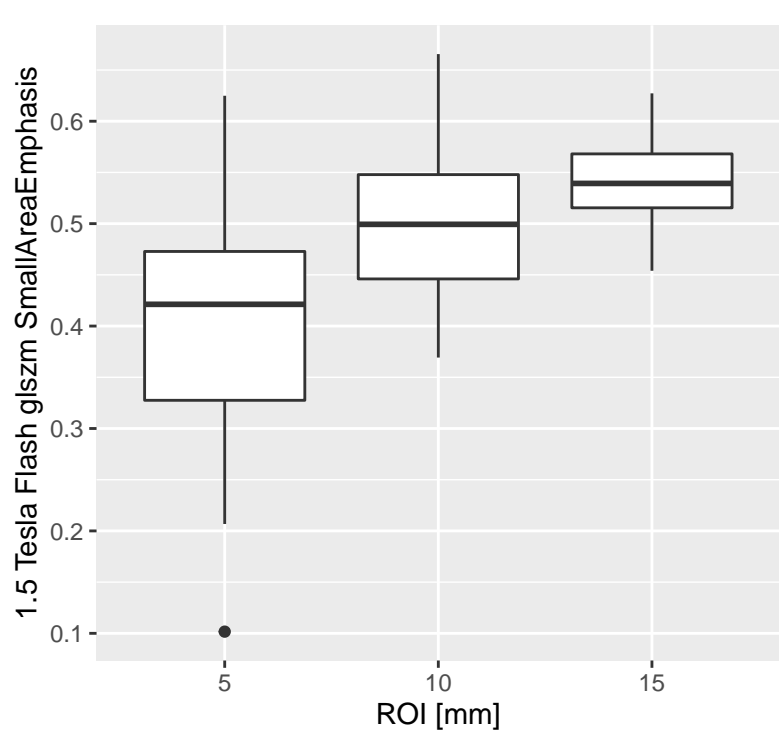

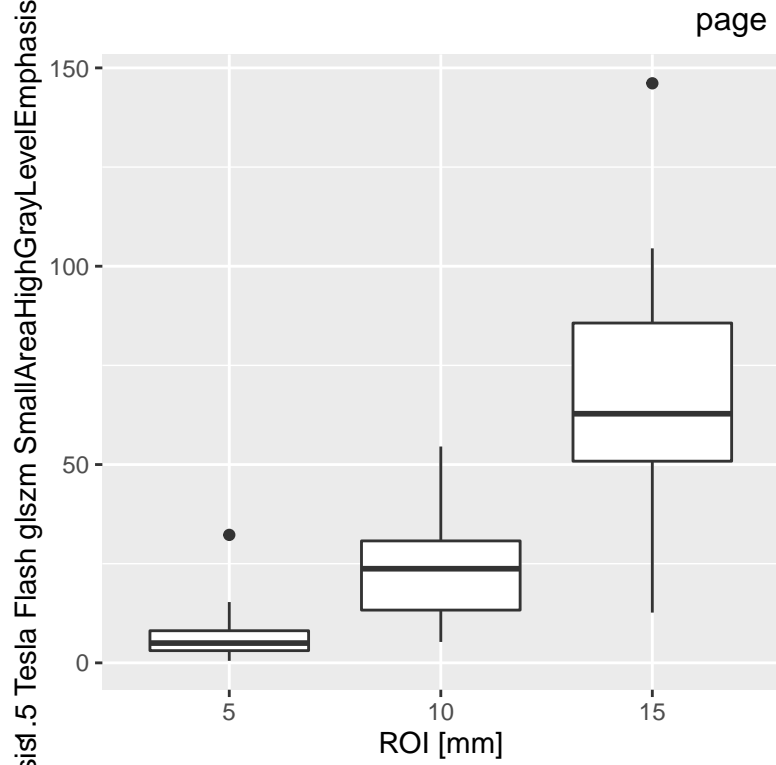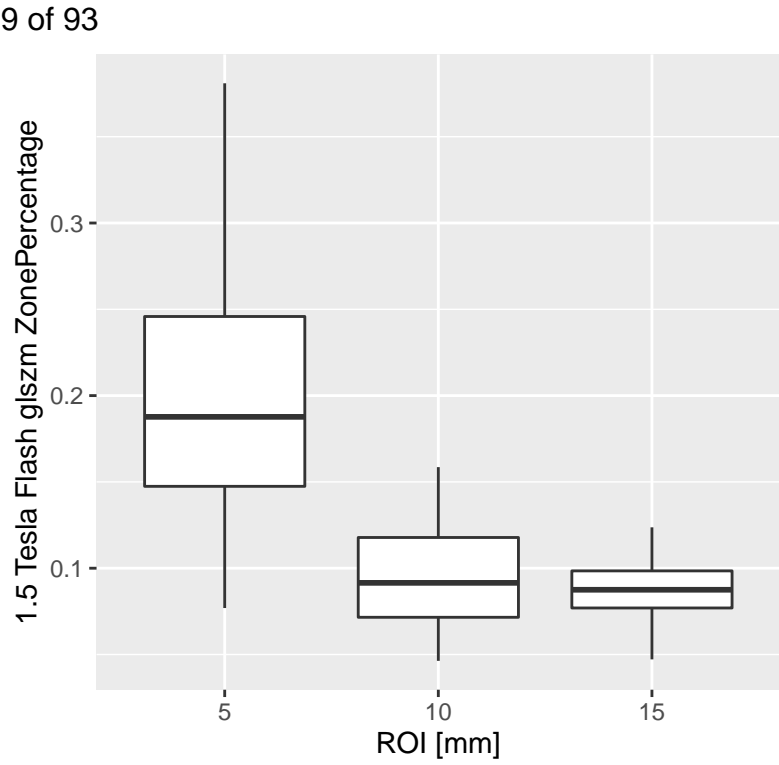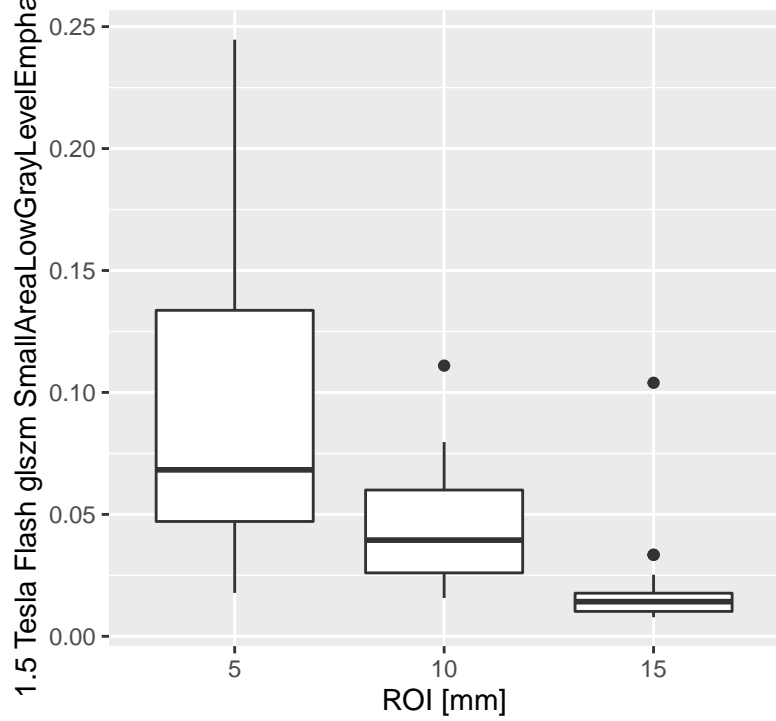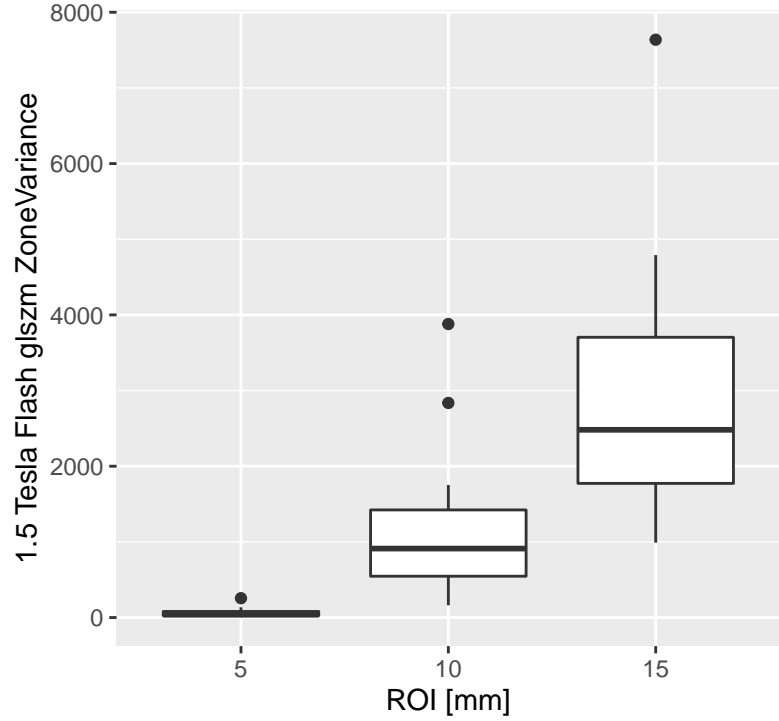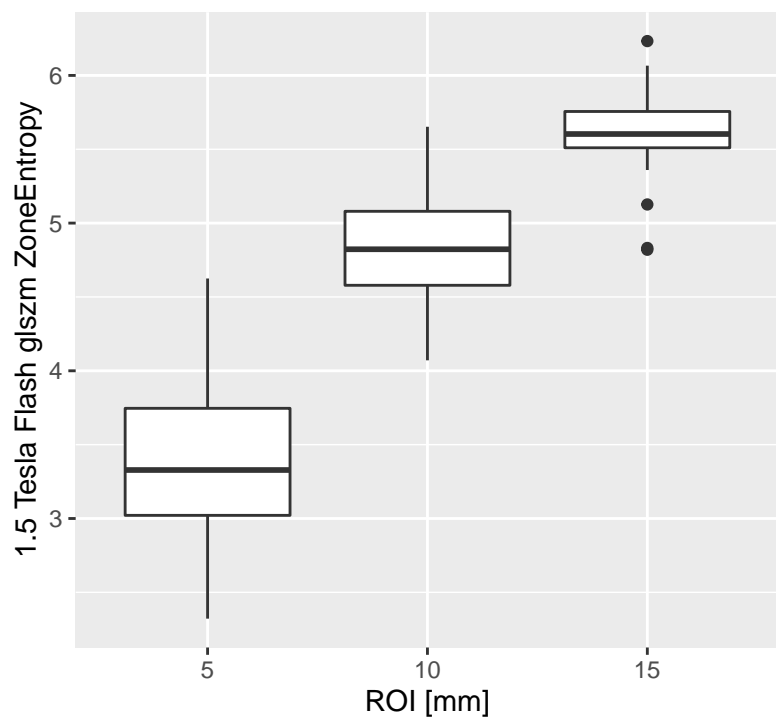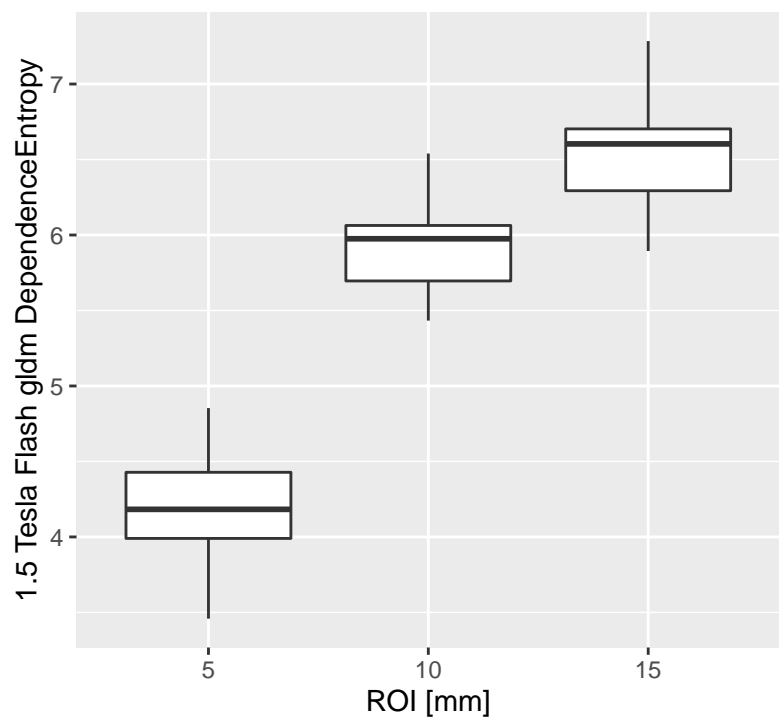

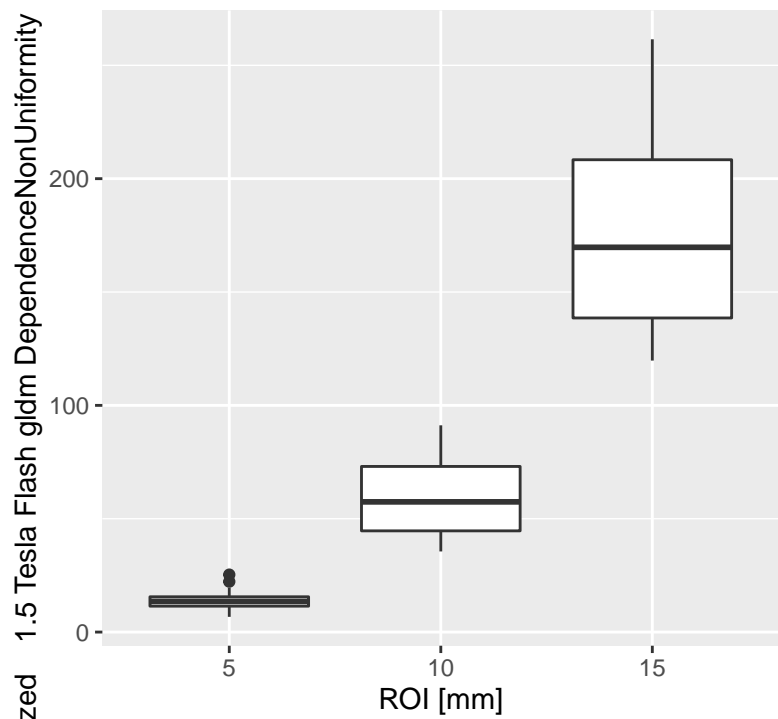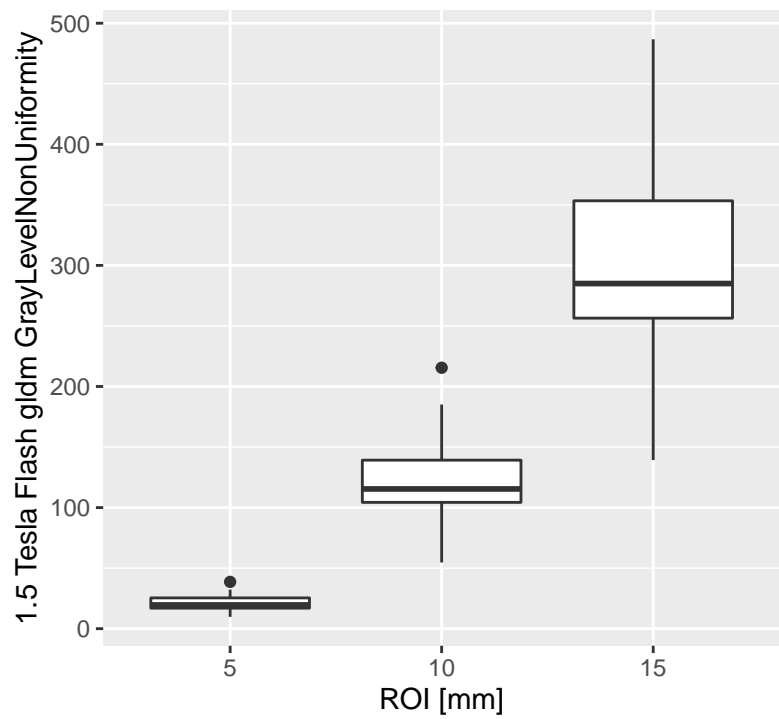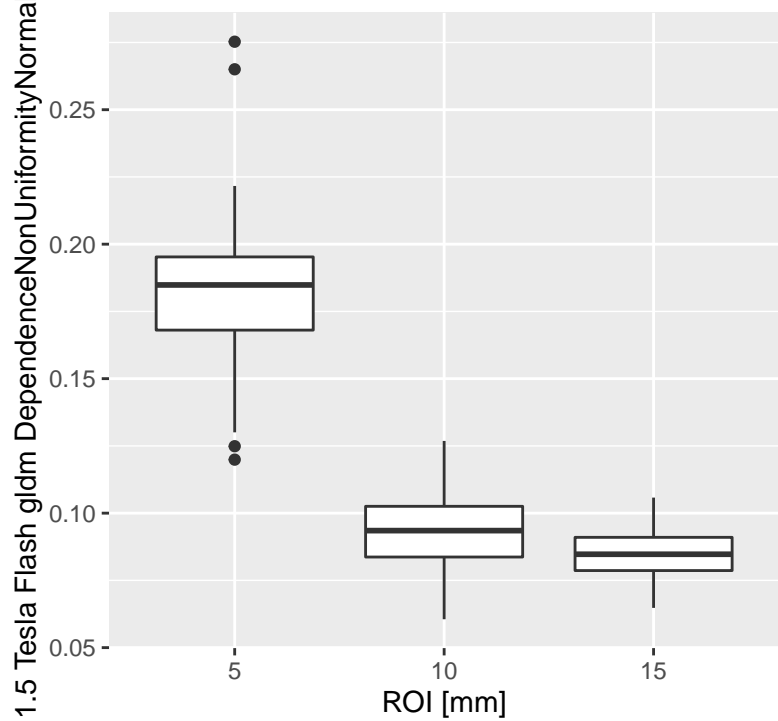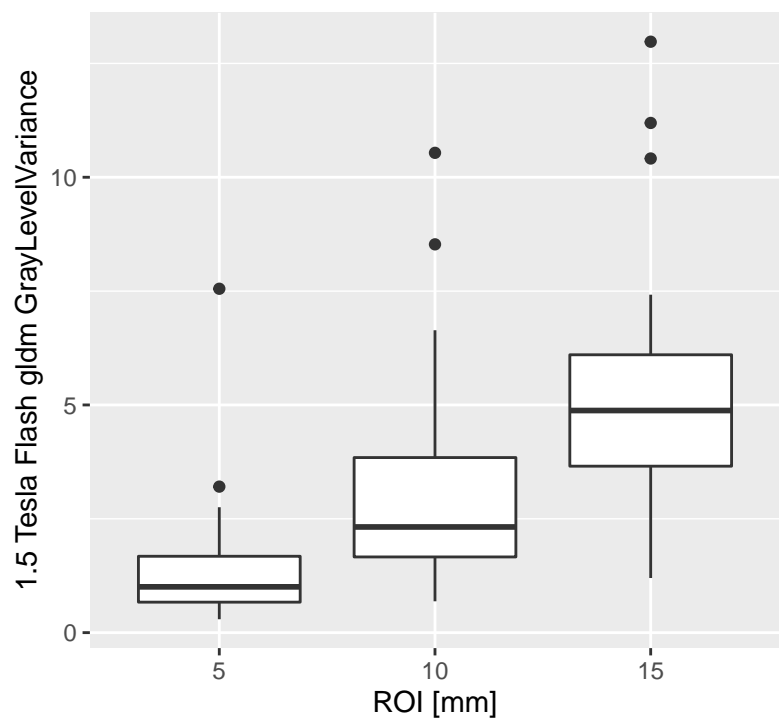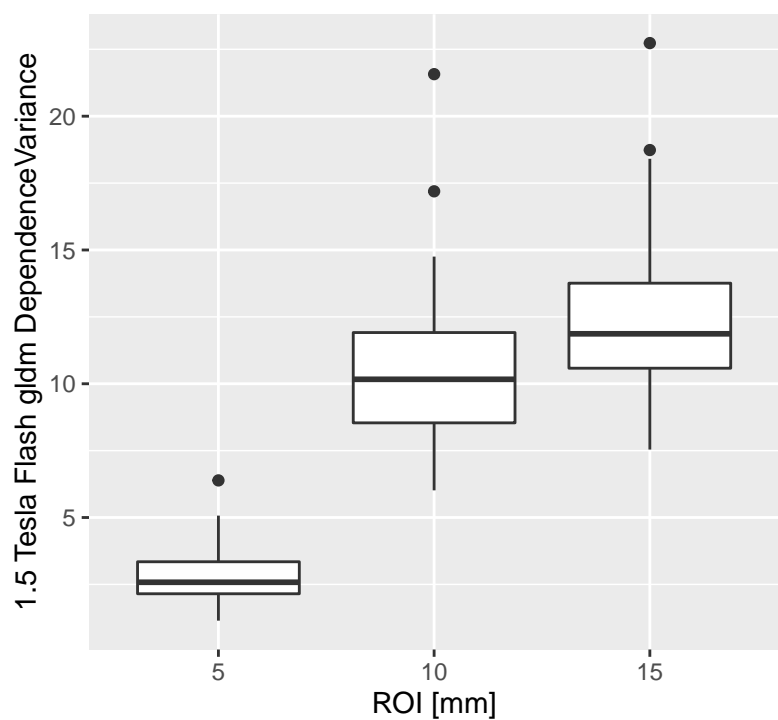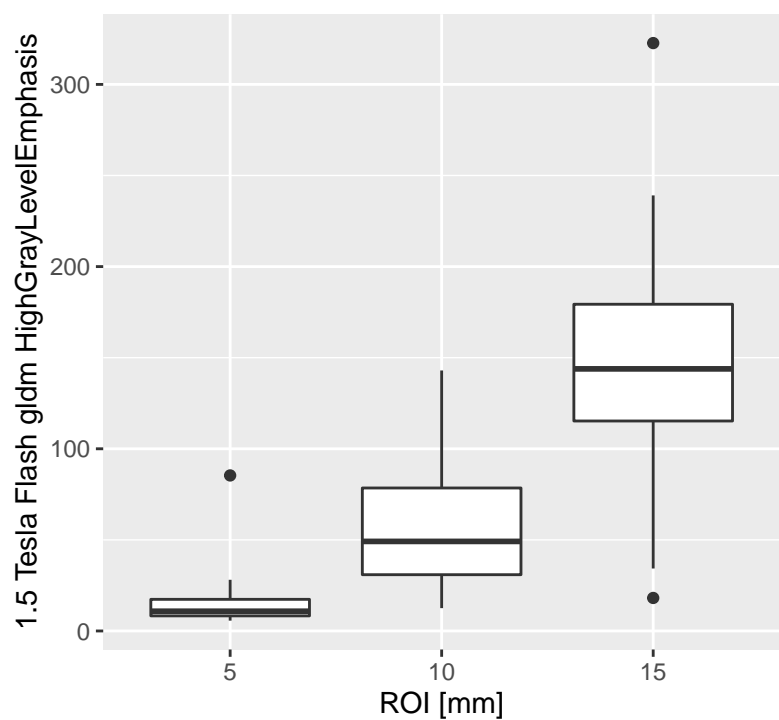

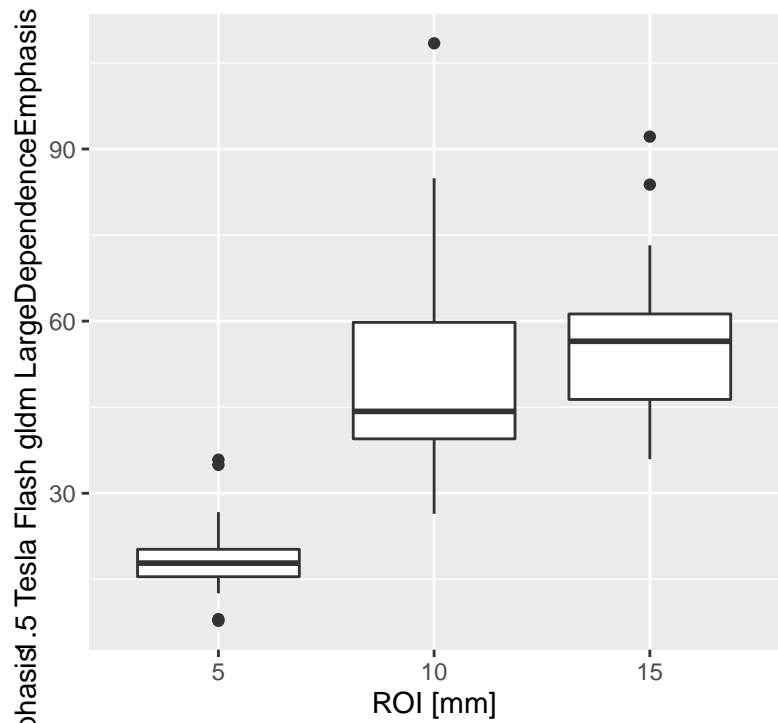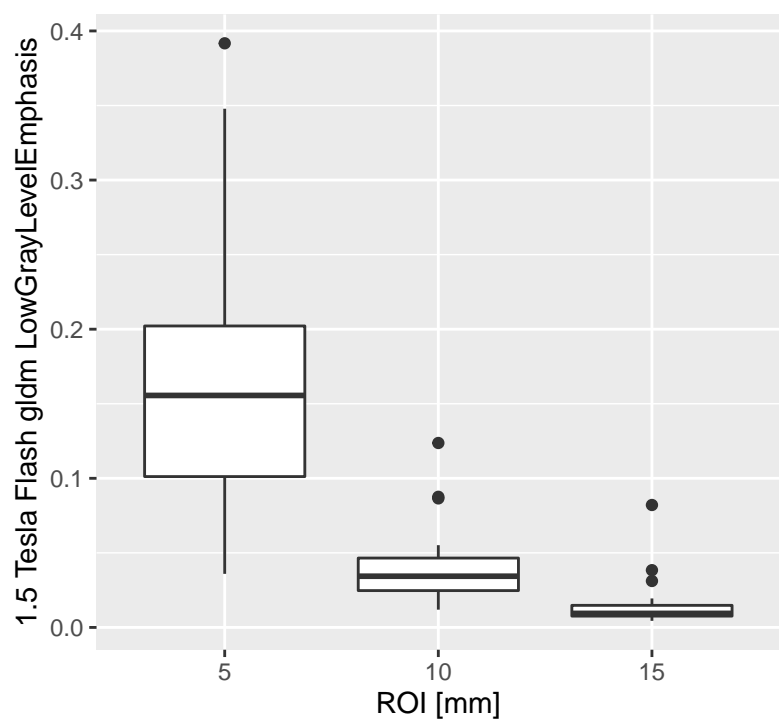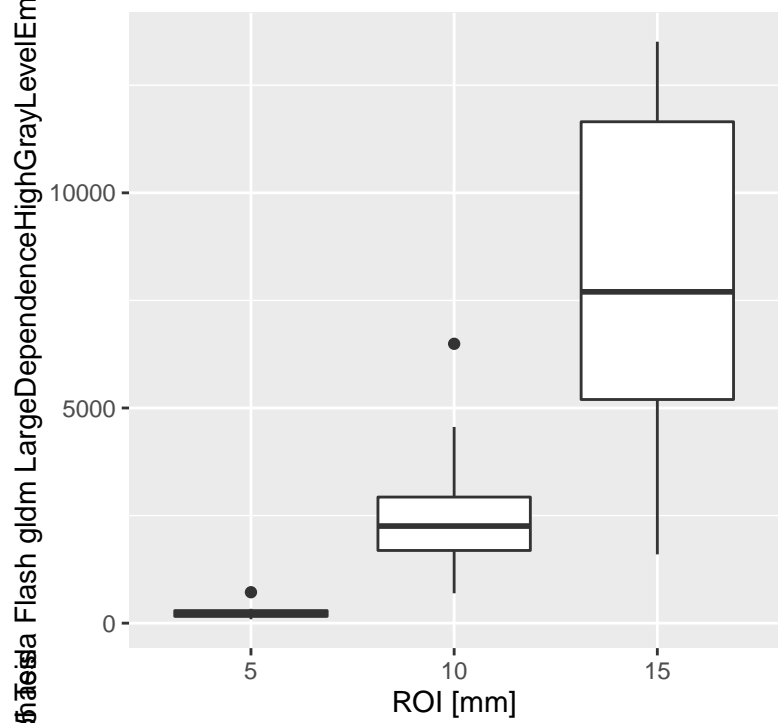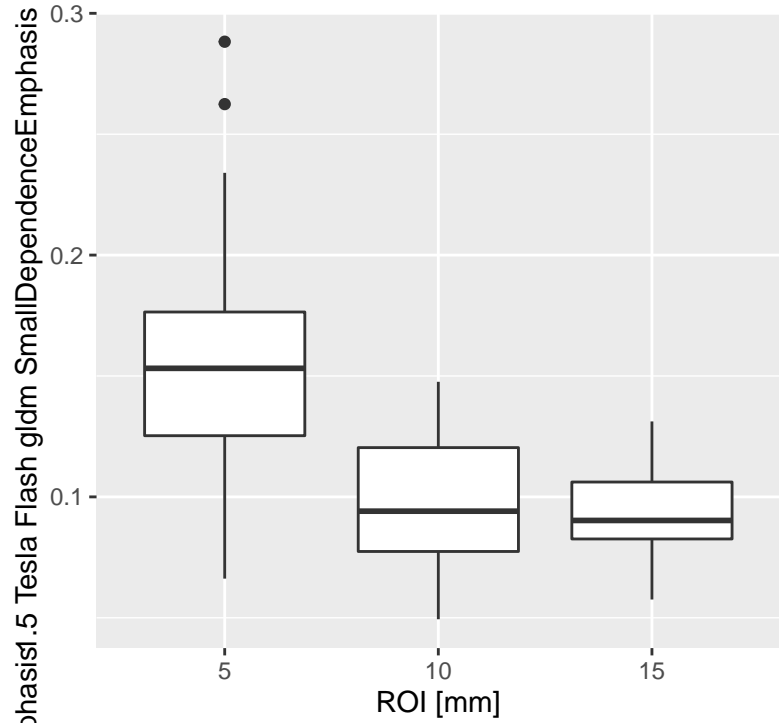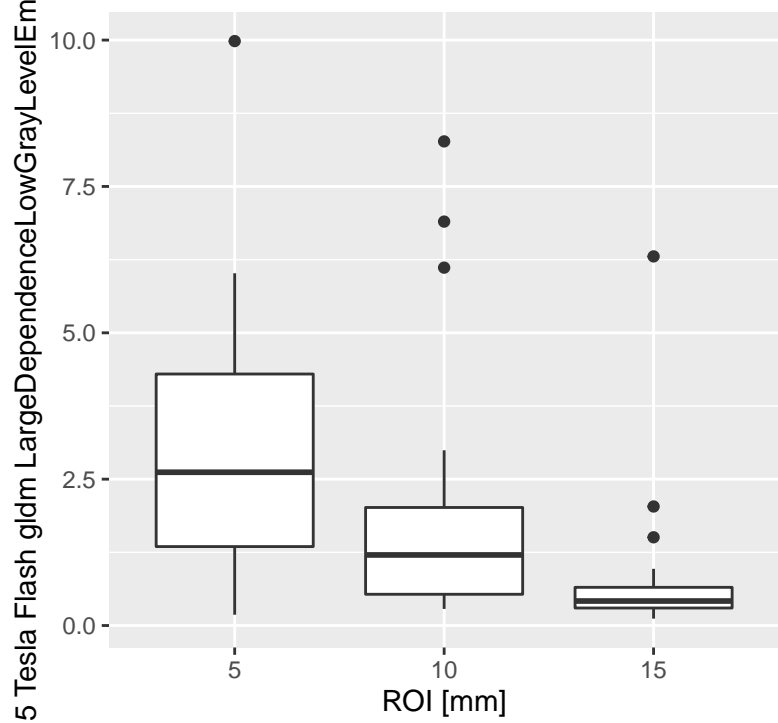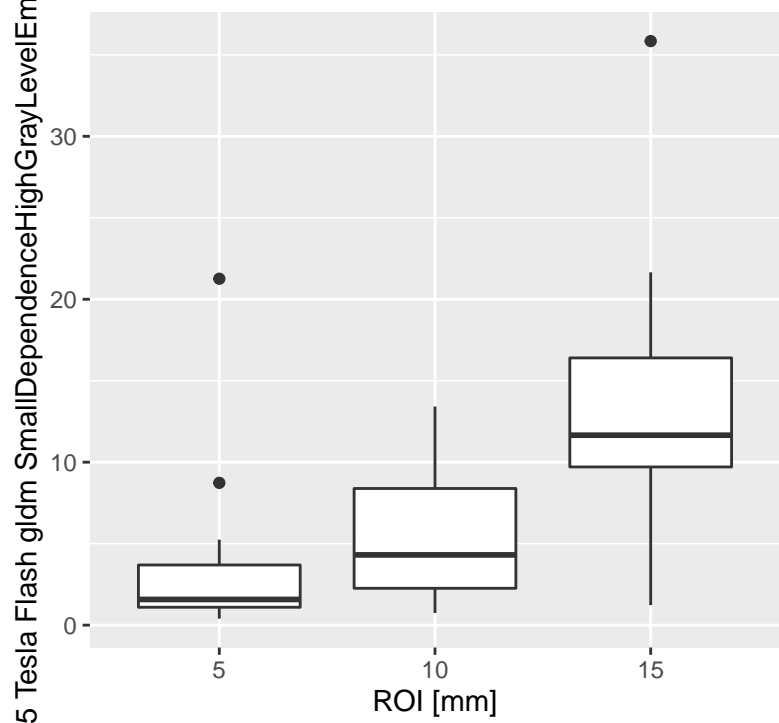

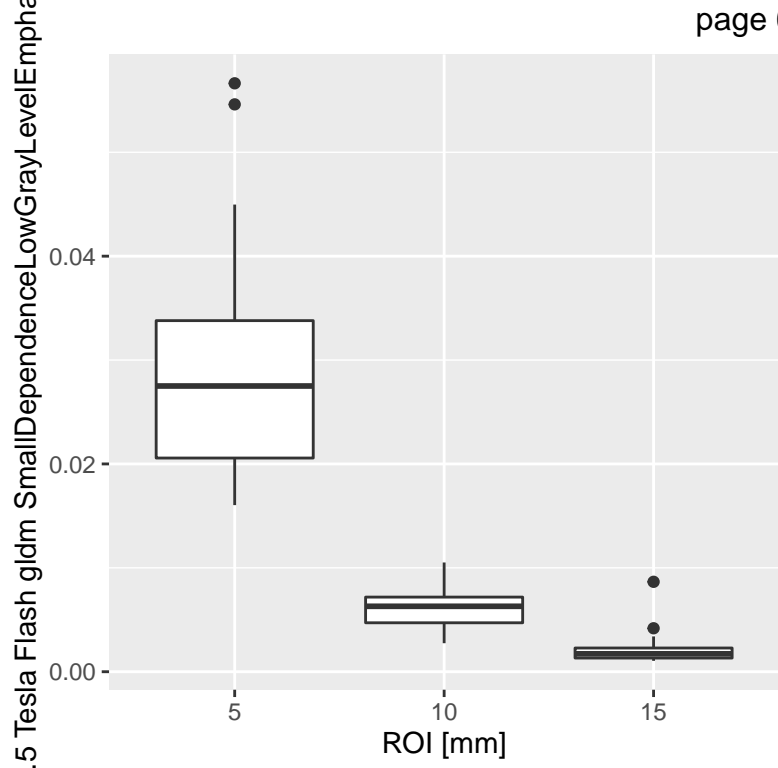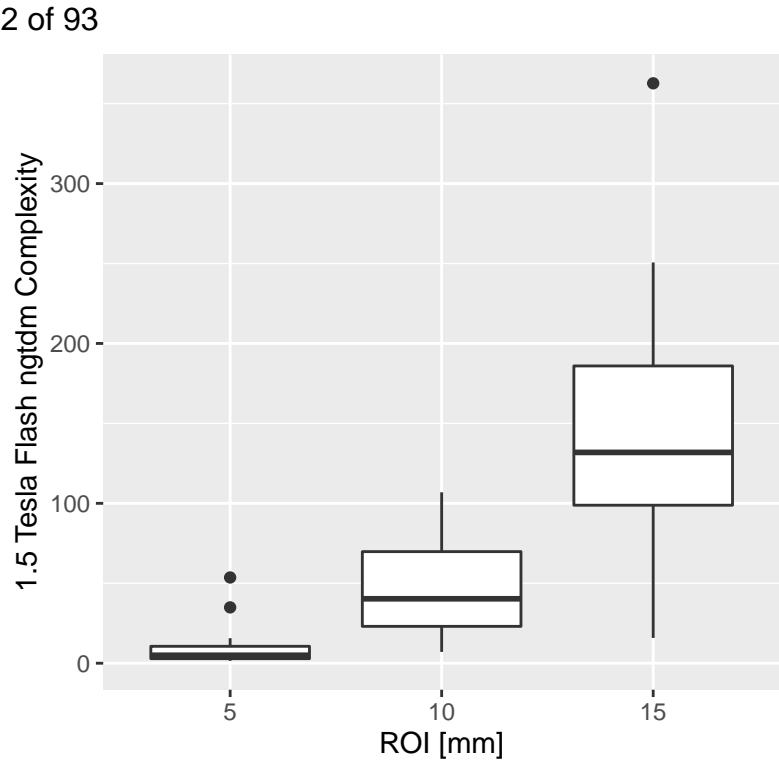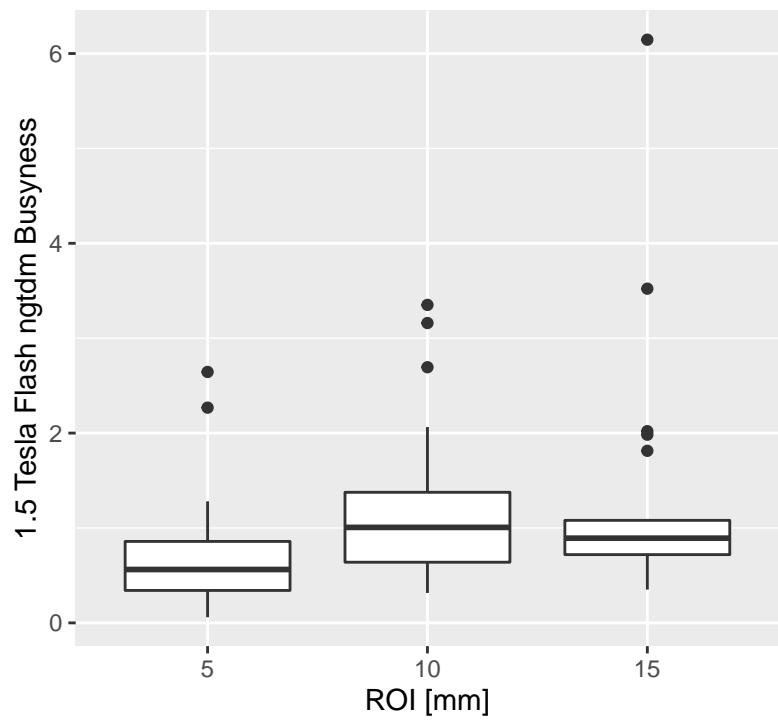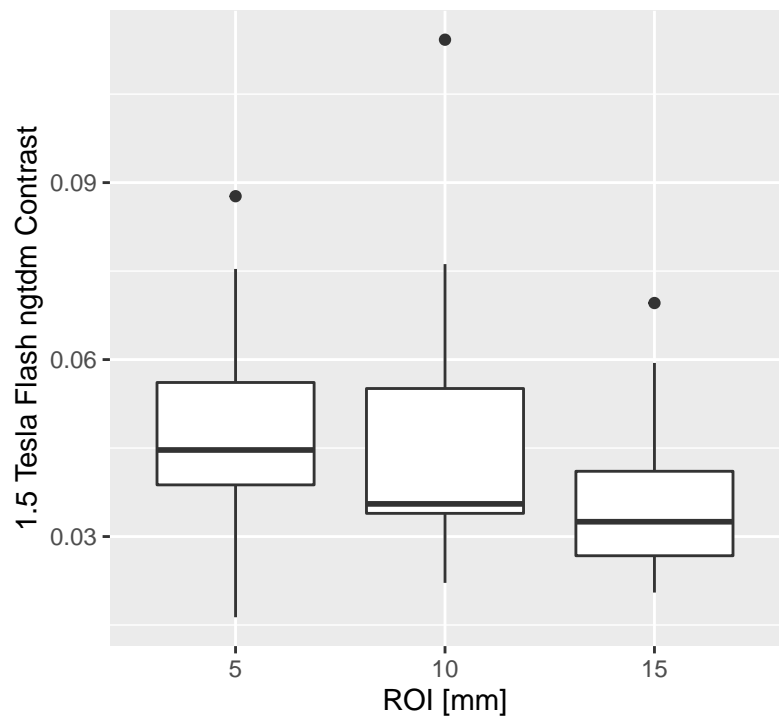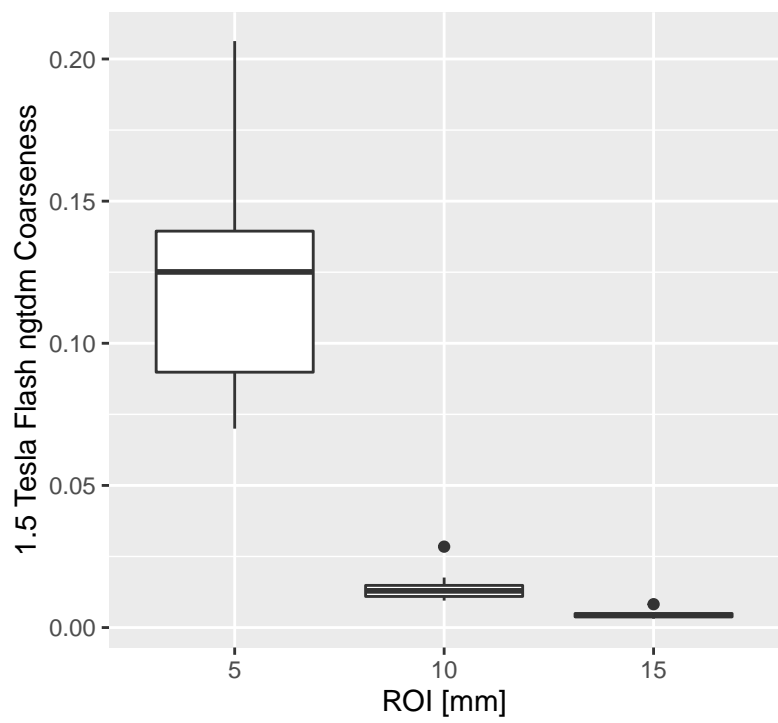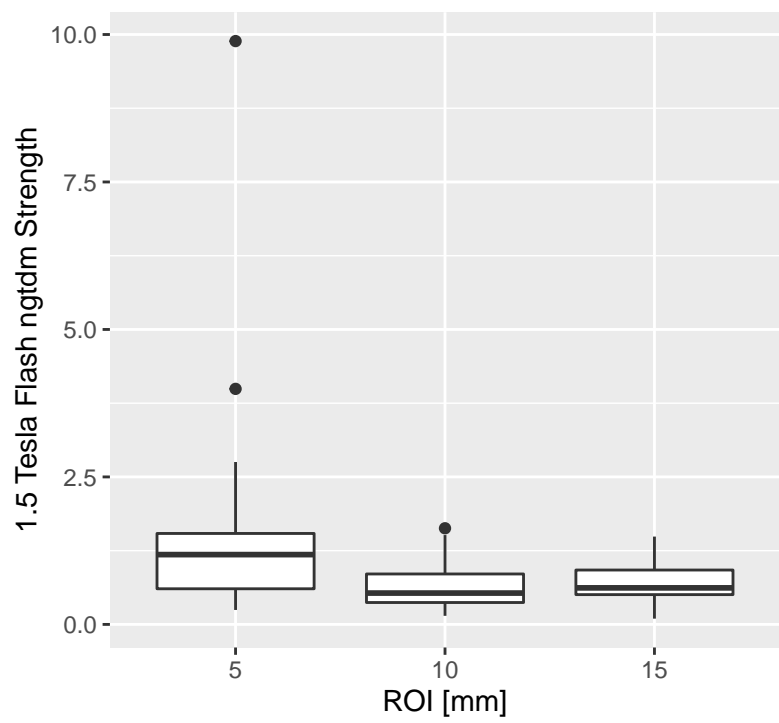

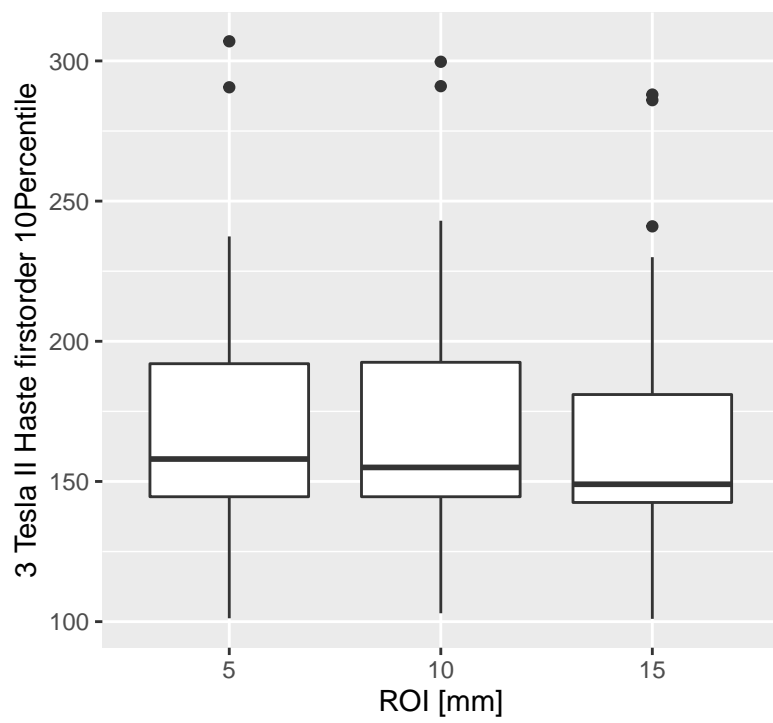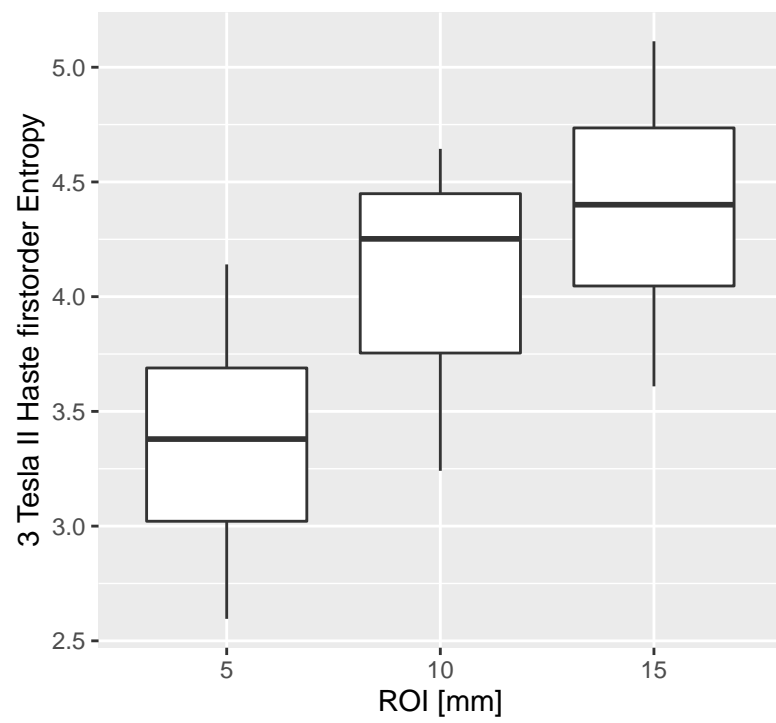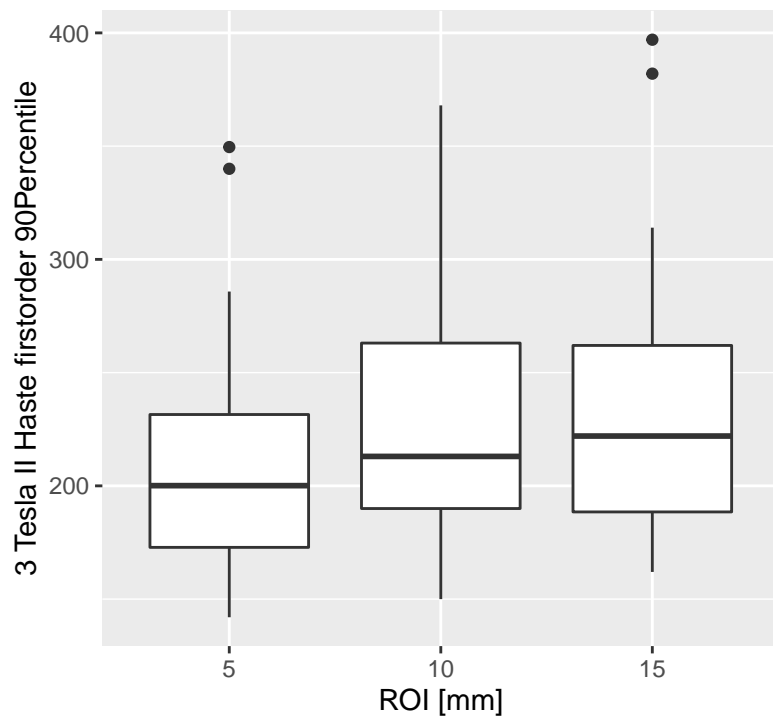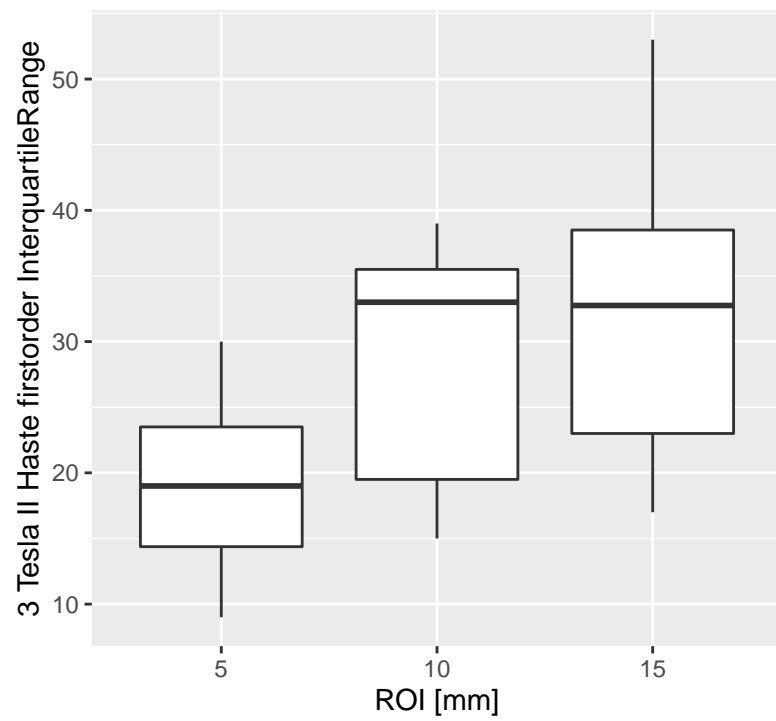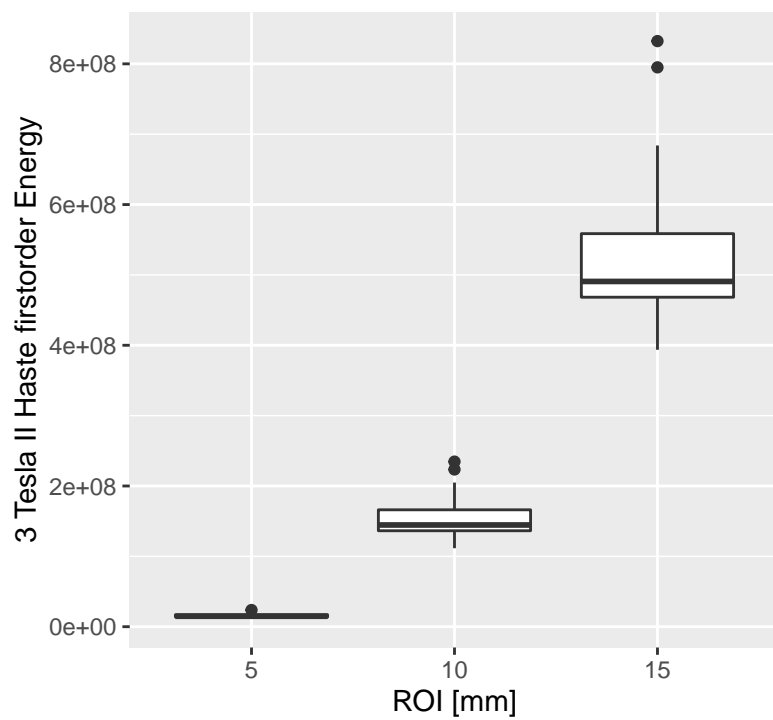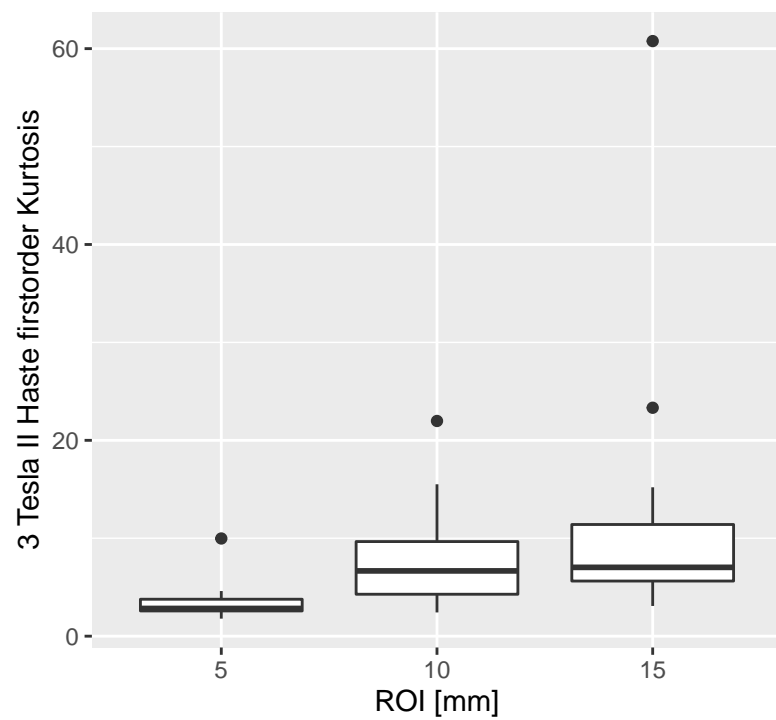

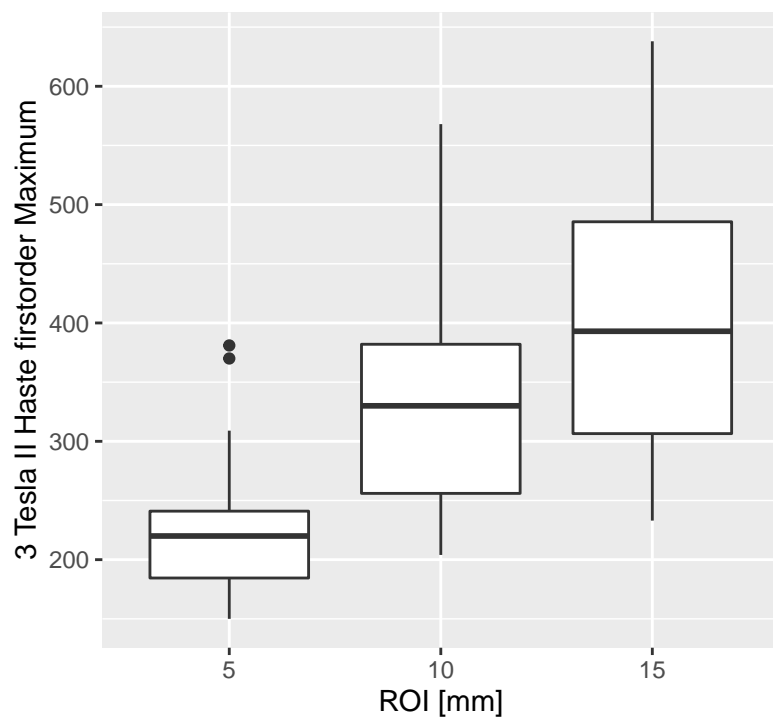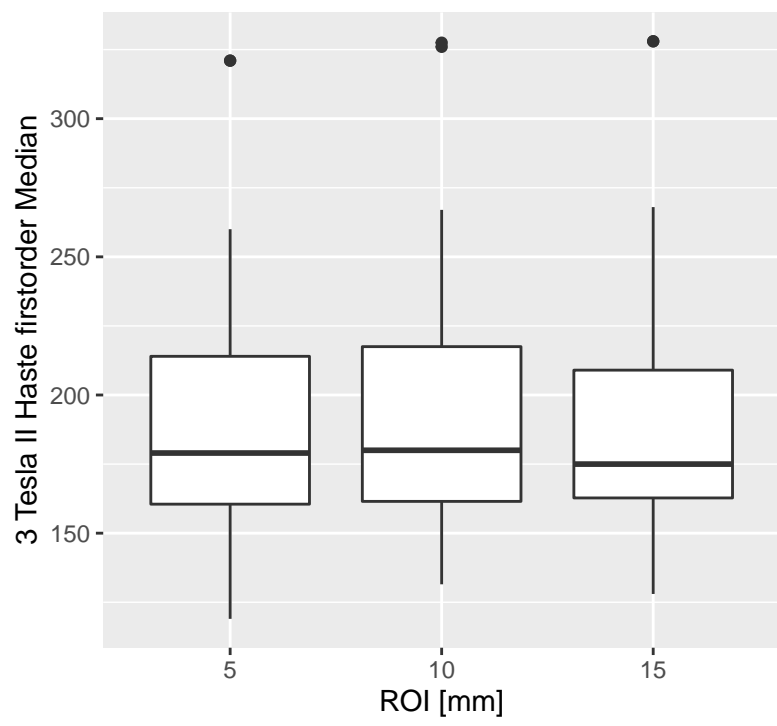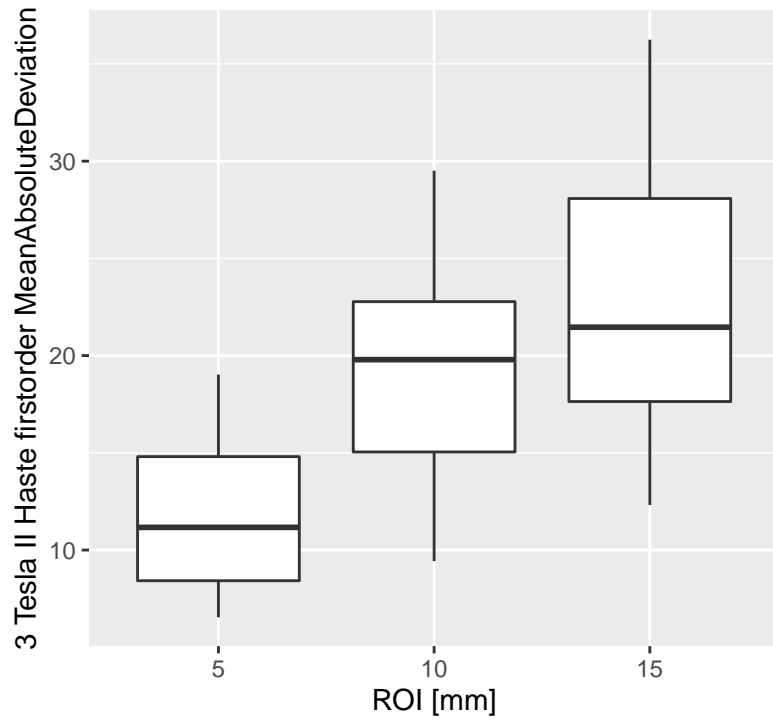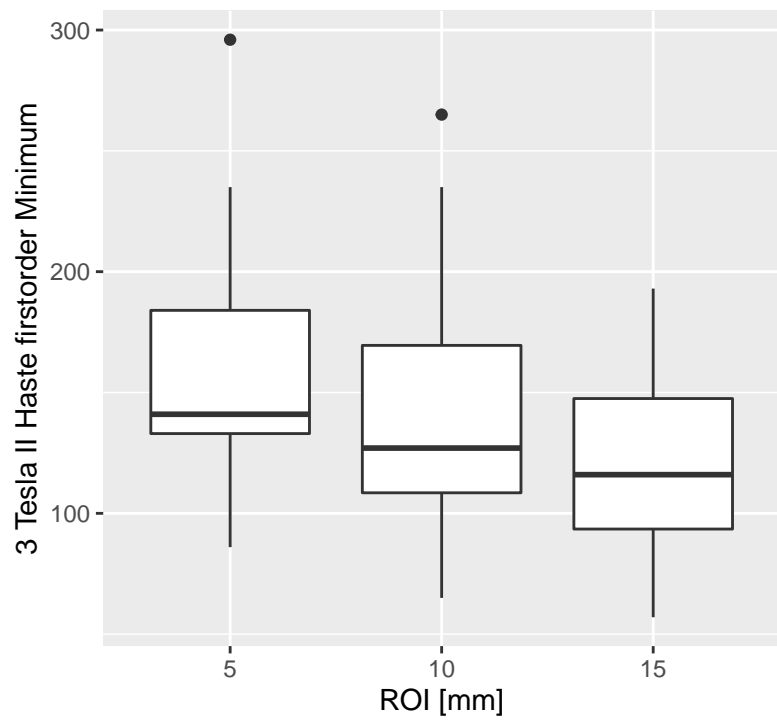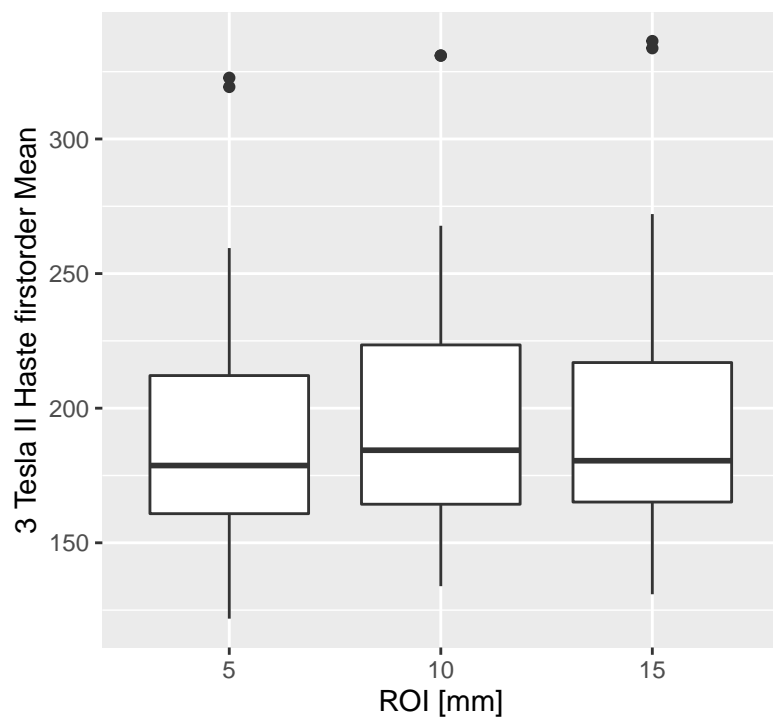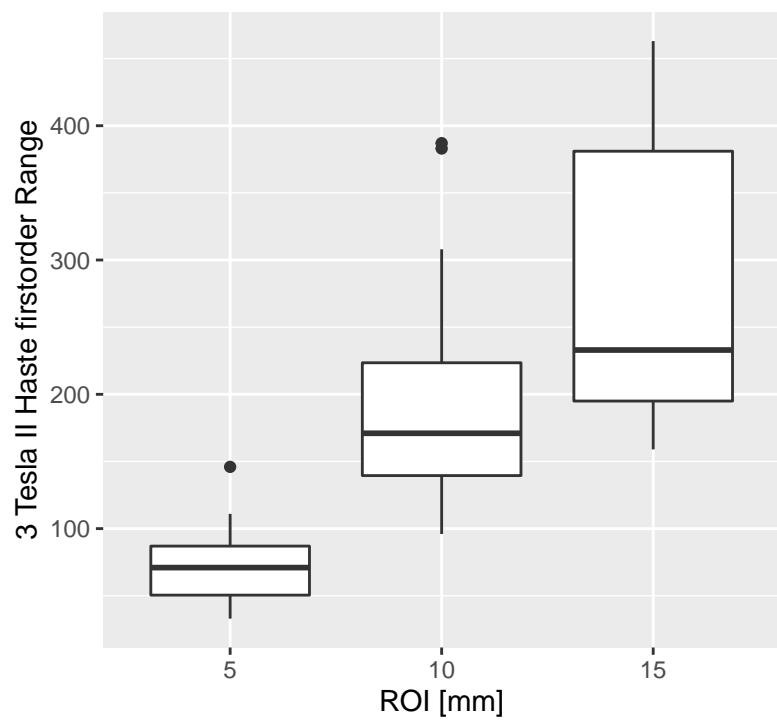



3 Tesla II Haste firstorder RobustMeanAbsoluteDeviation

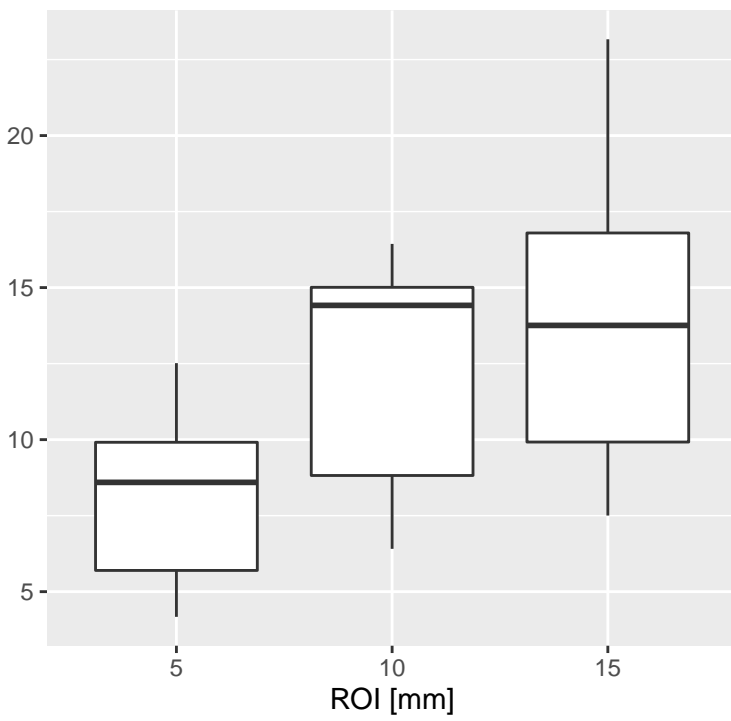

3 Tesla II Haste firstorder TotalEnergy

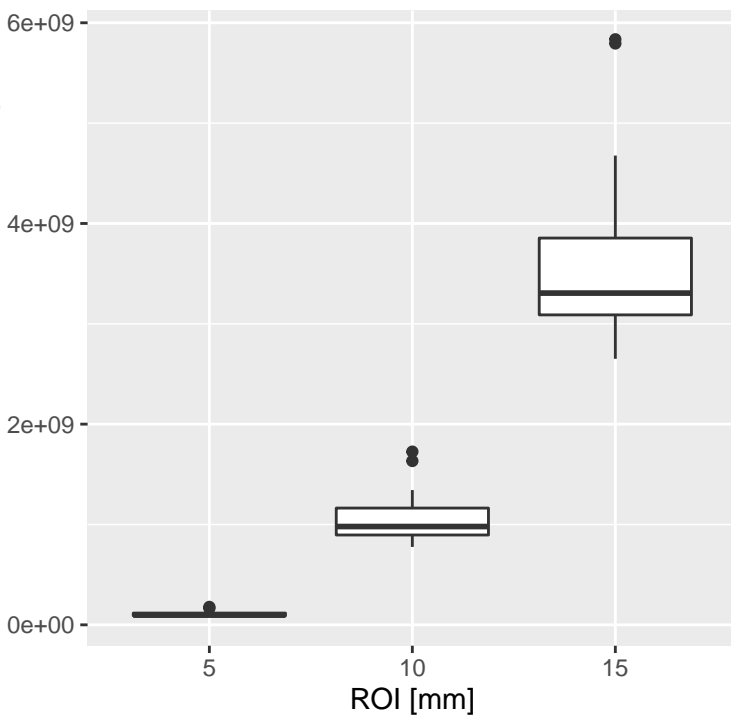

3 Tesla II Haste firstorder RootMeanSquared

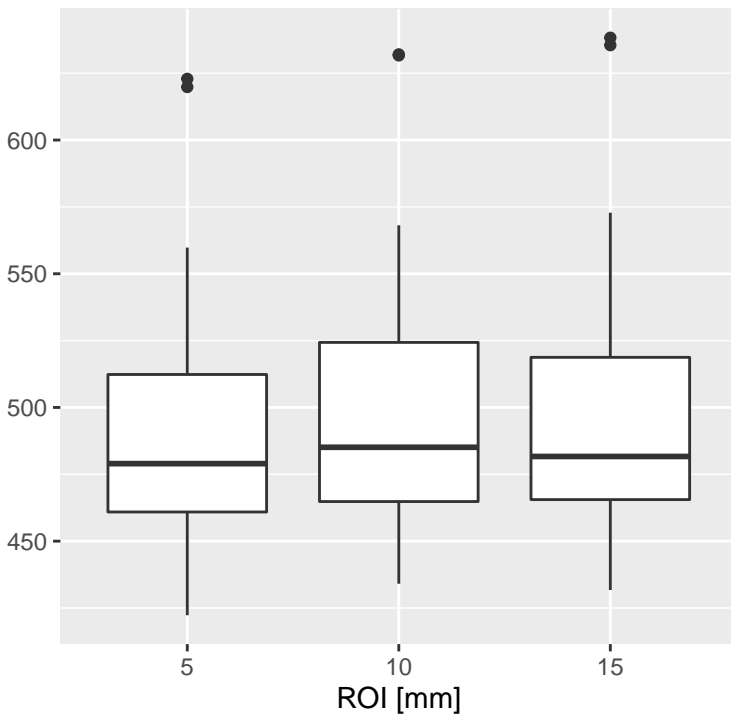

3 Tesla II Haste firstorder Uniformity

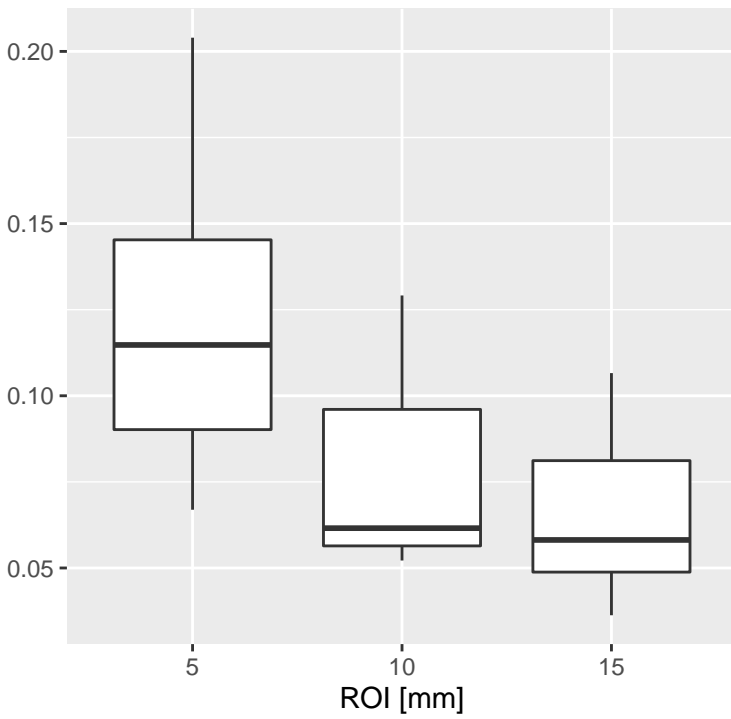

3 Tesla II Haste firstorder Skewness

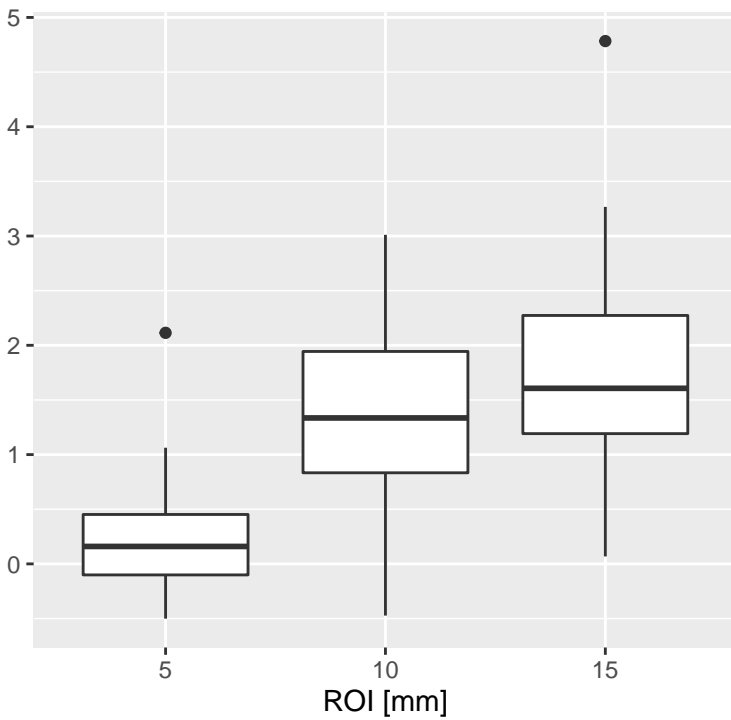

3 Tesla II Haste firstorder Variance

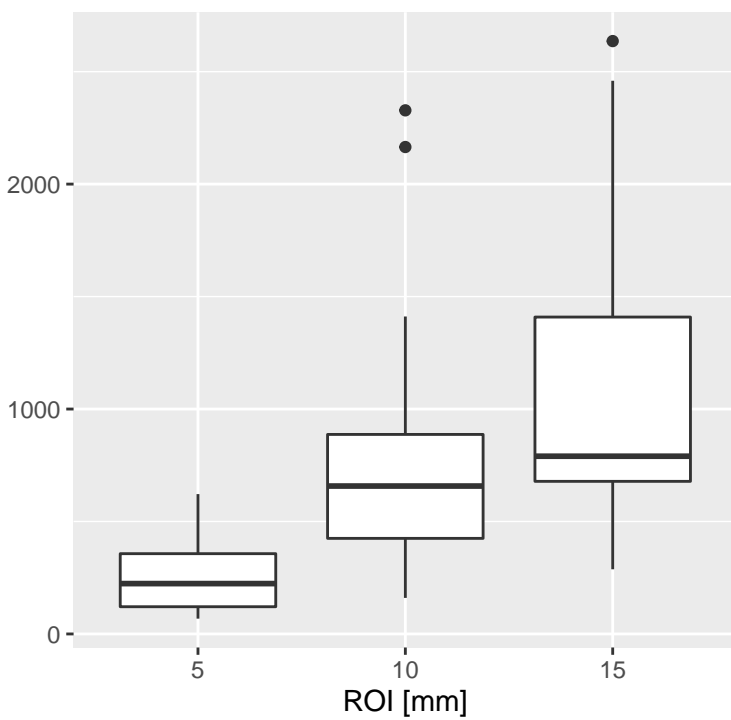

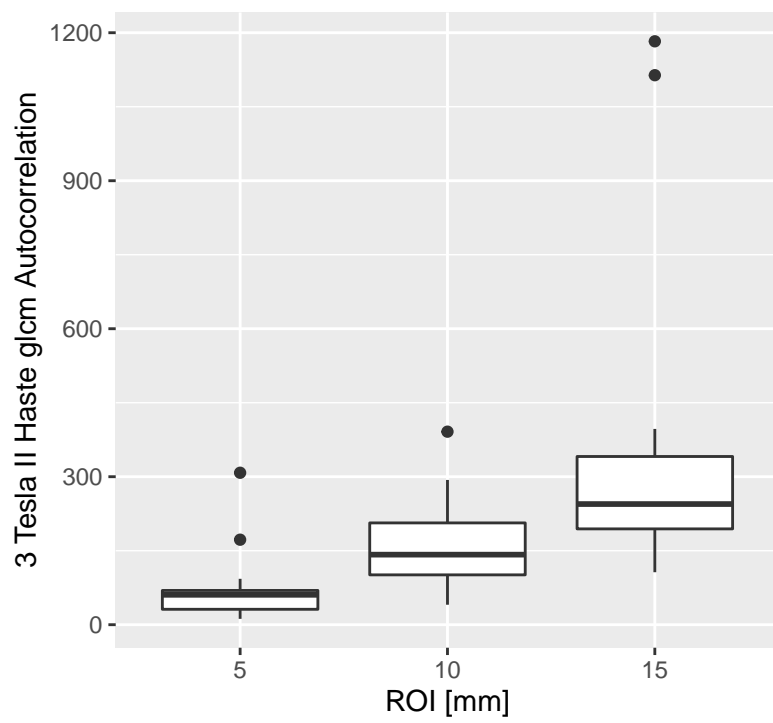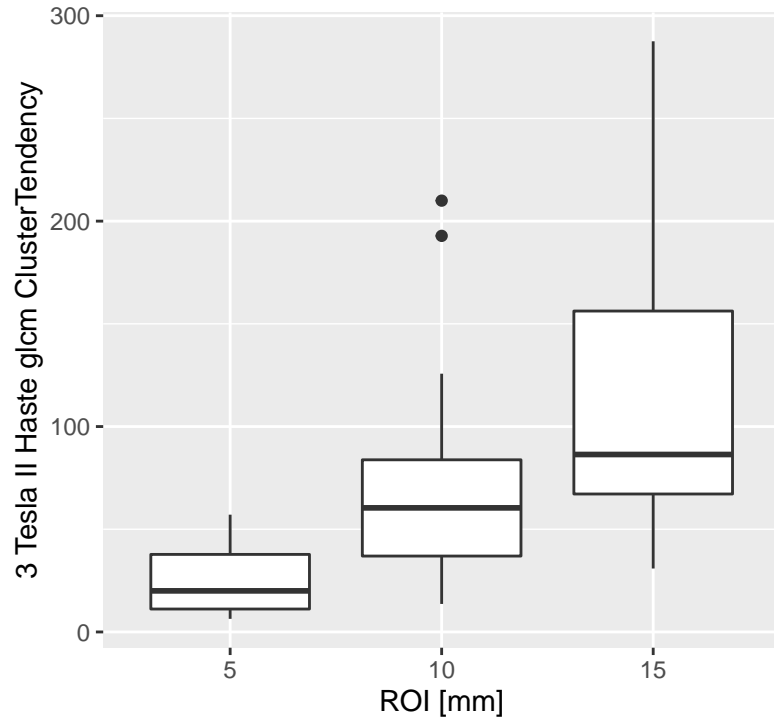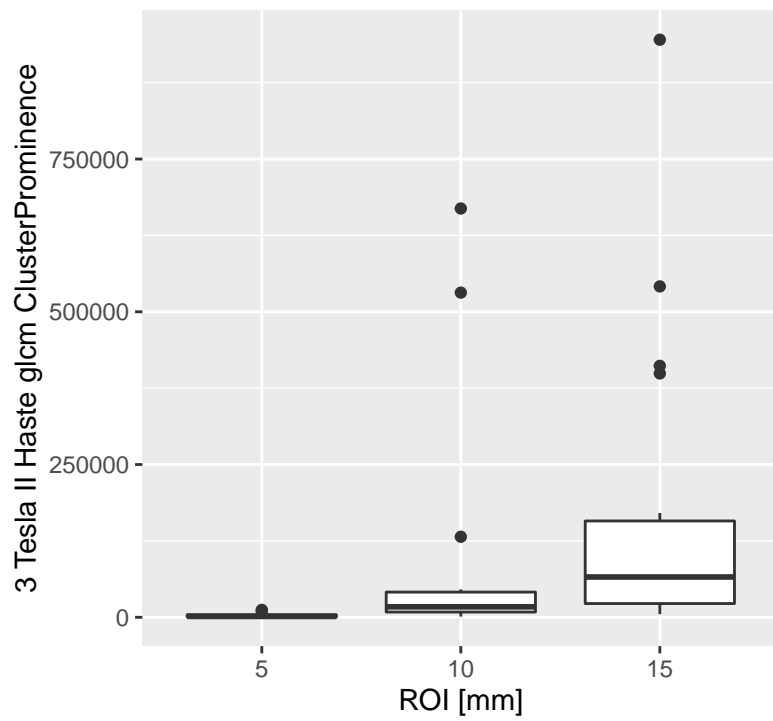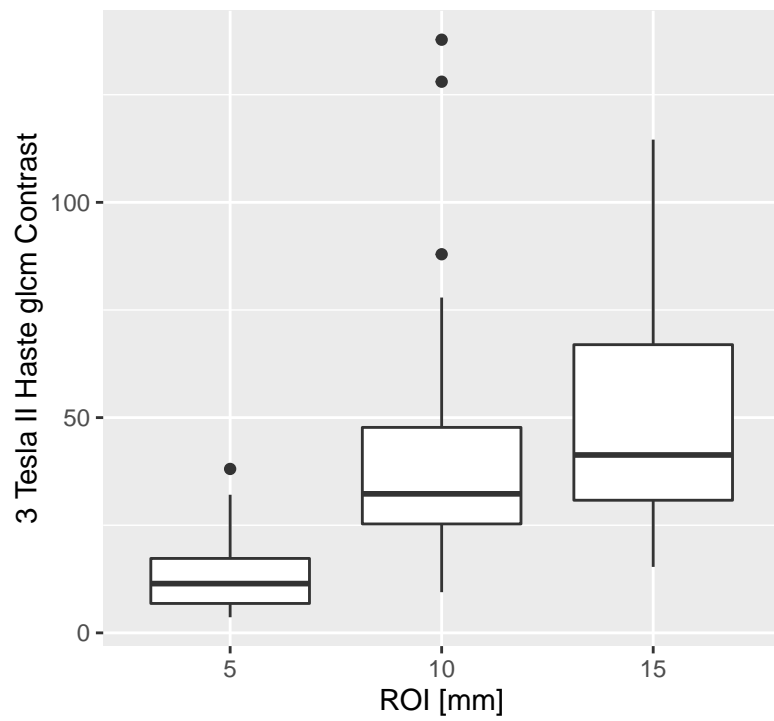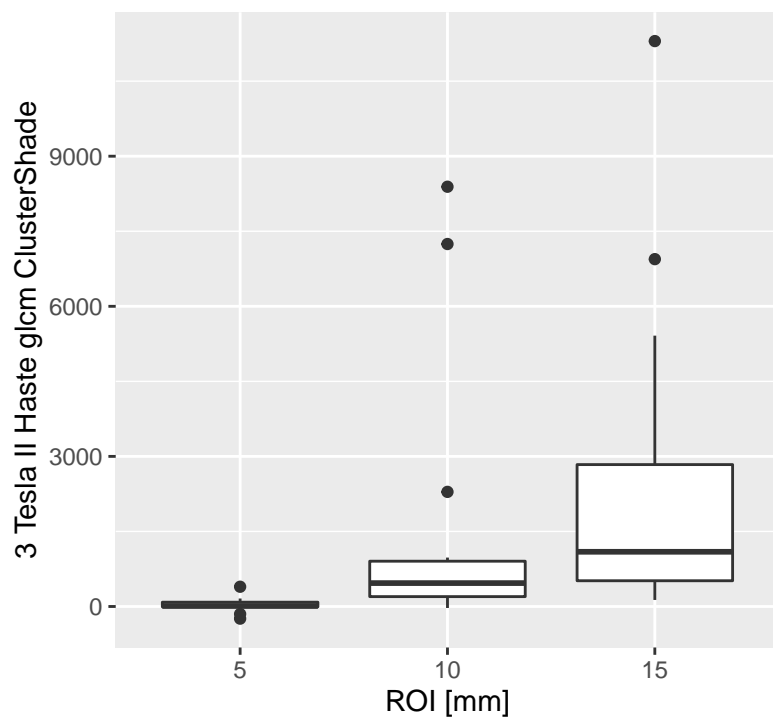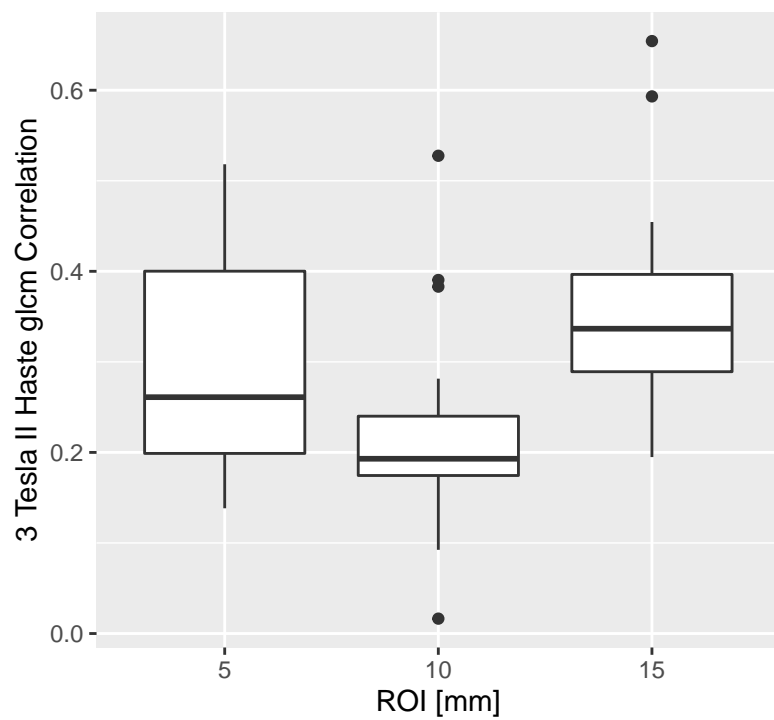

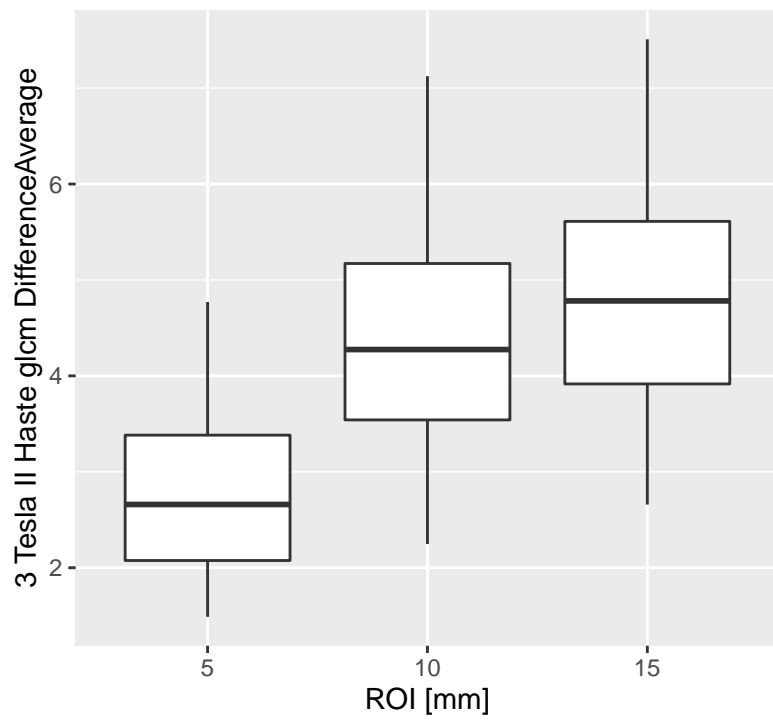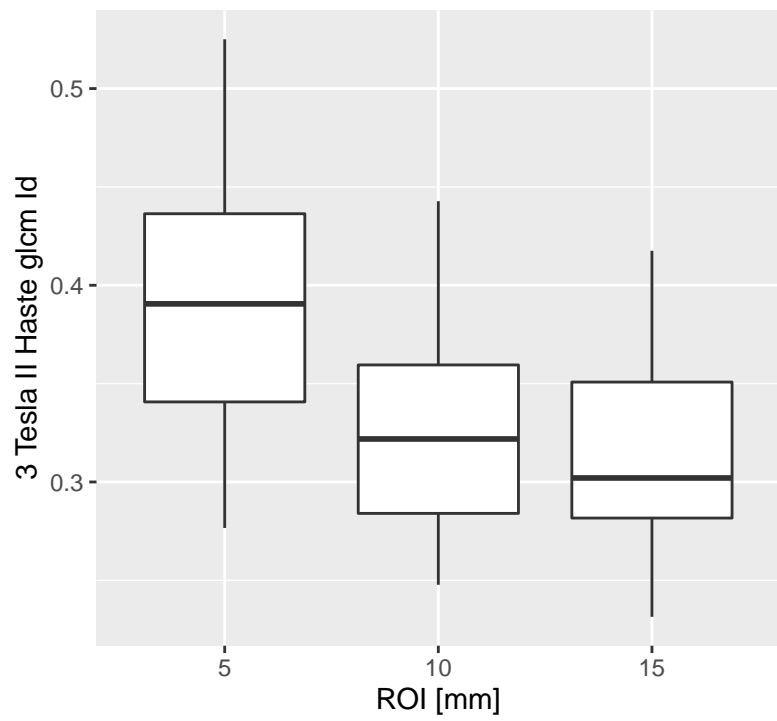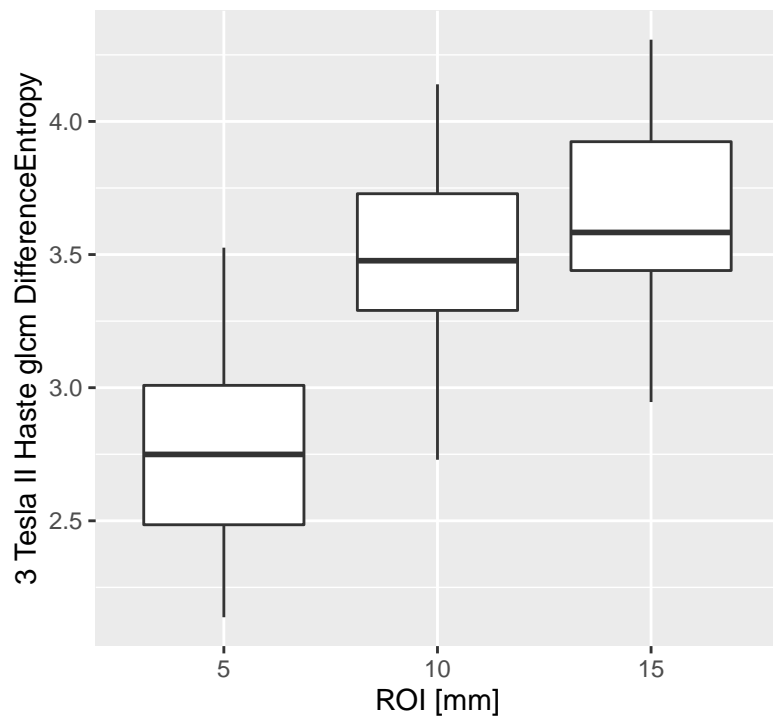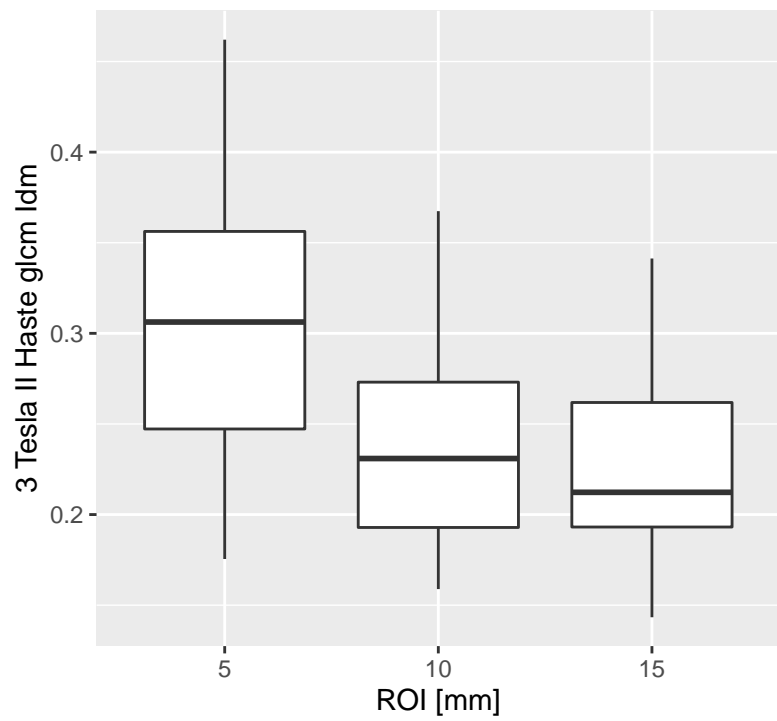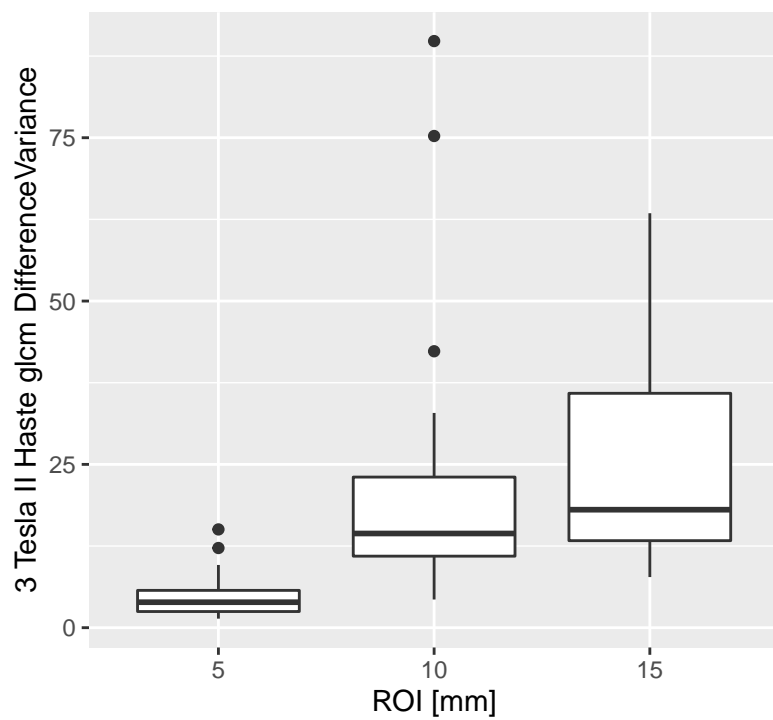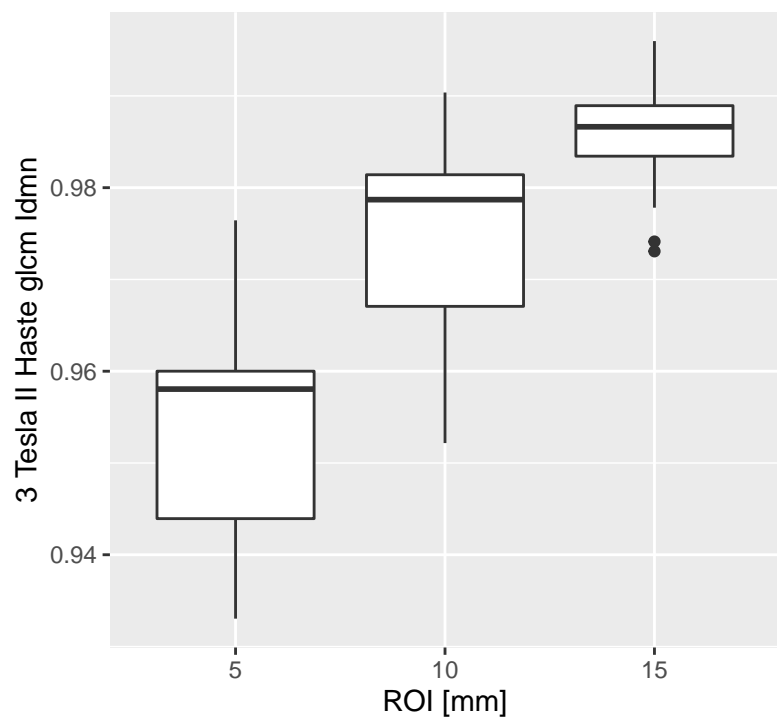

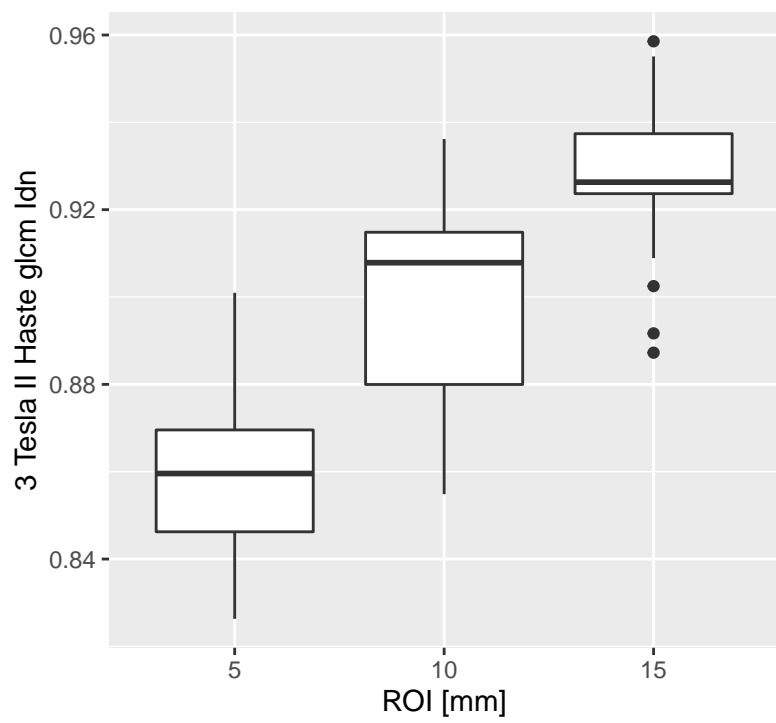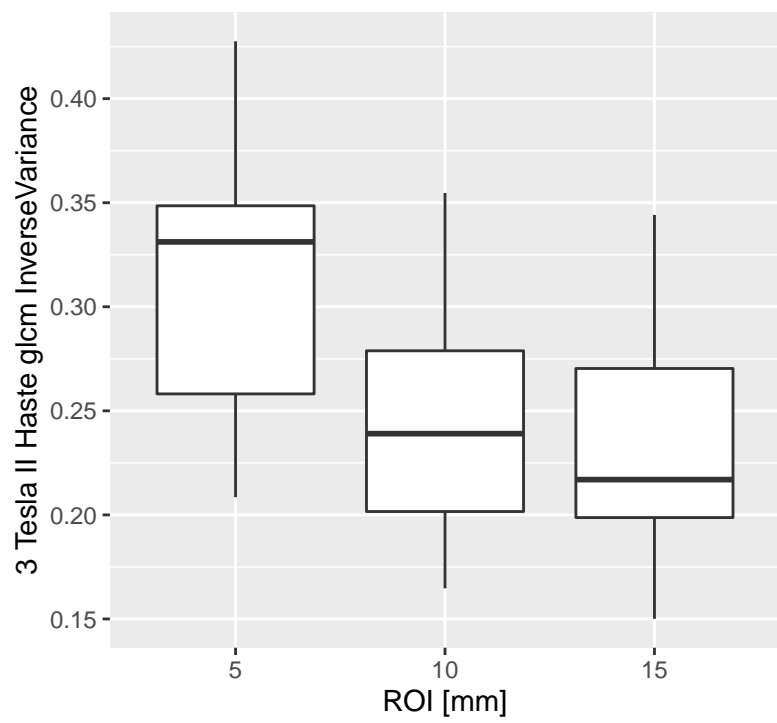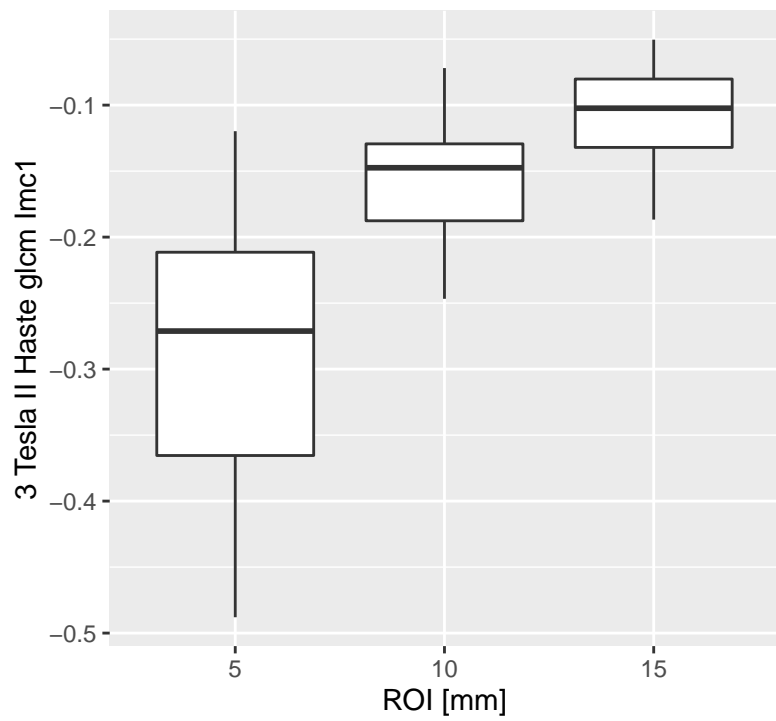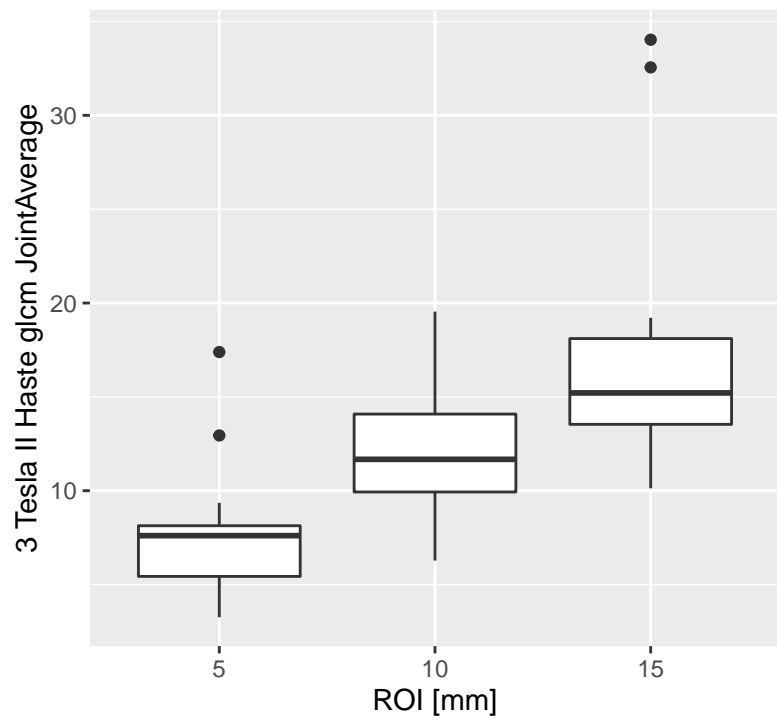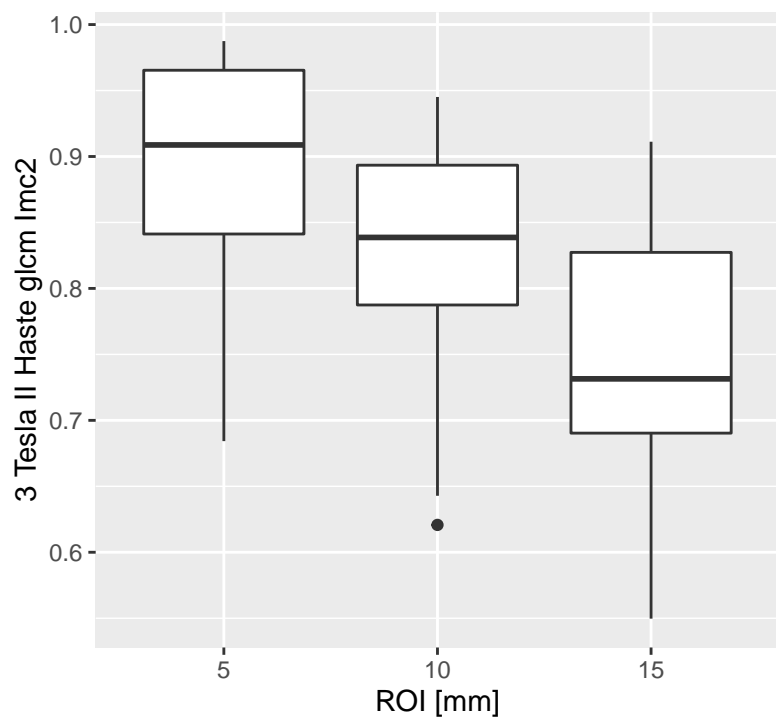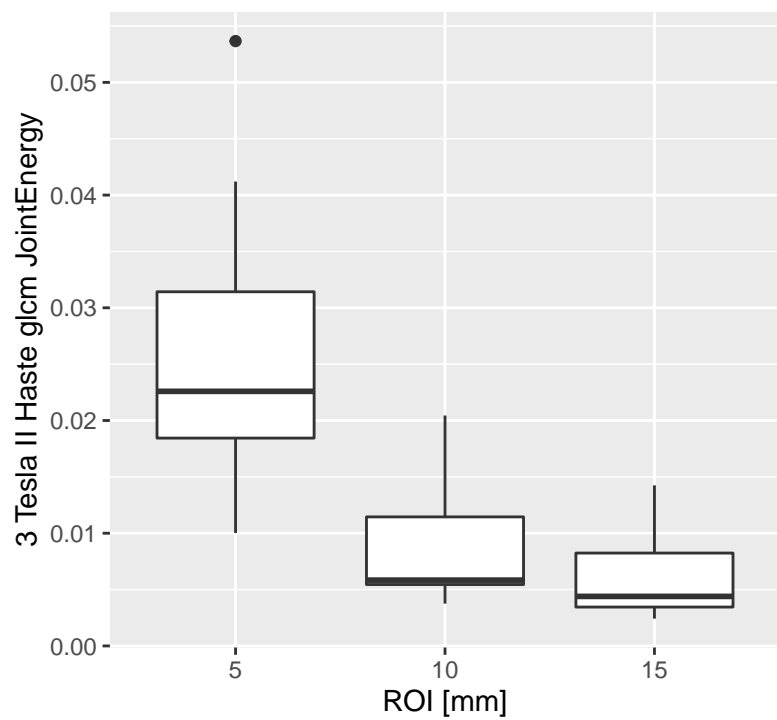

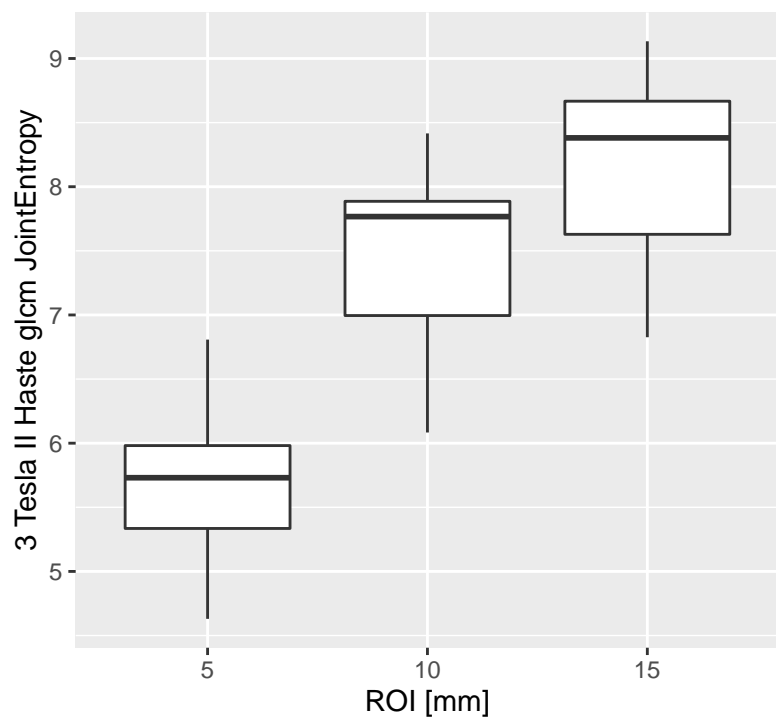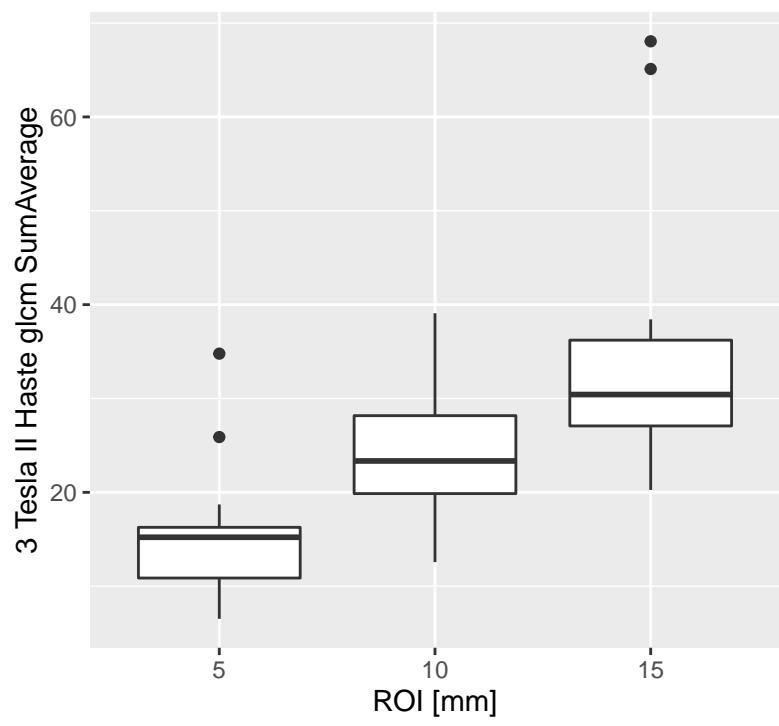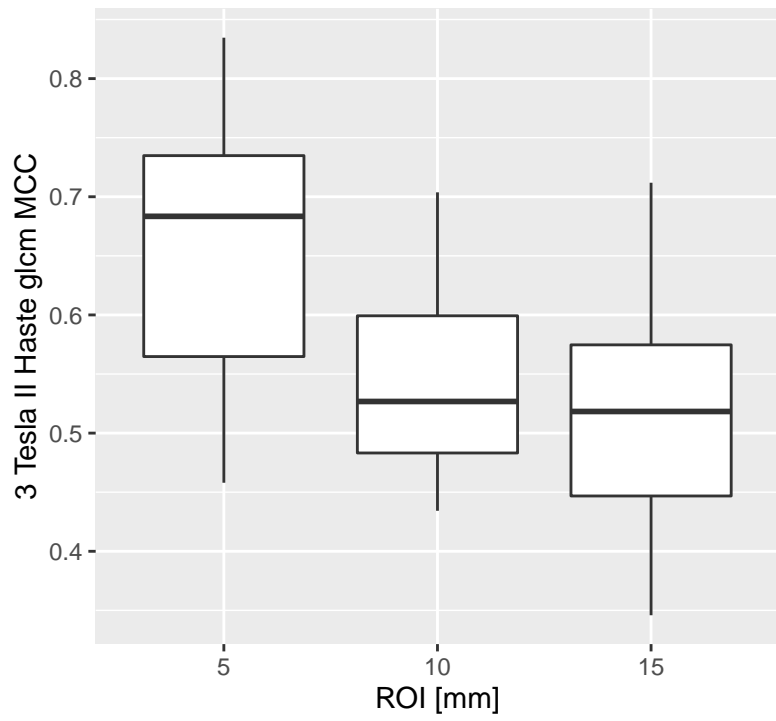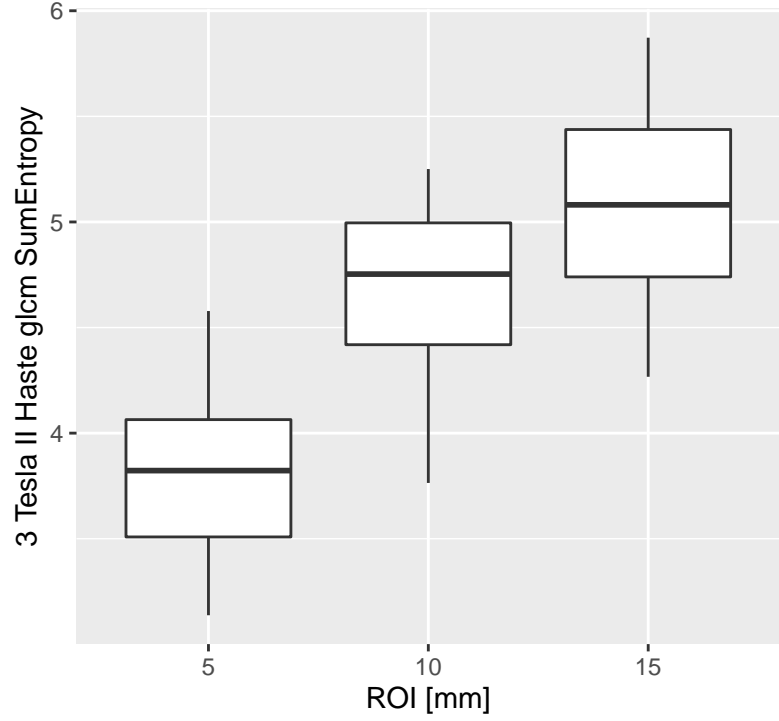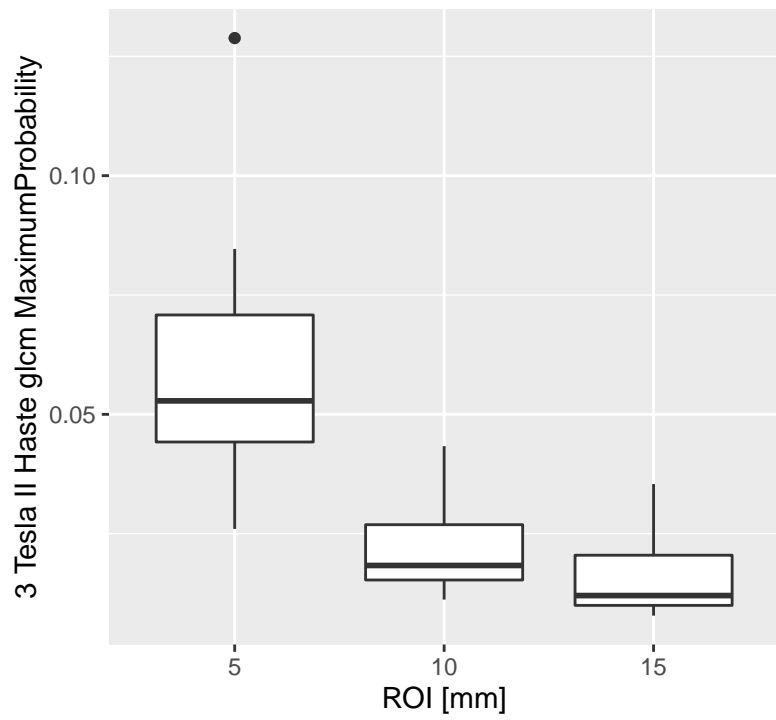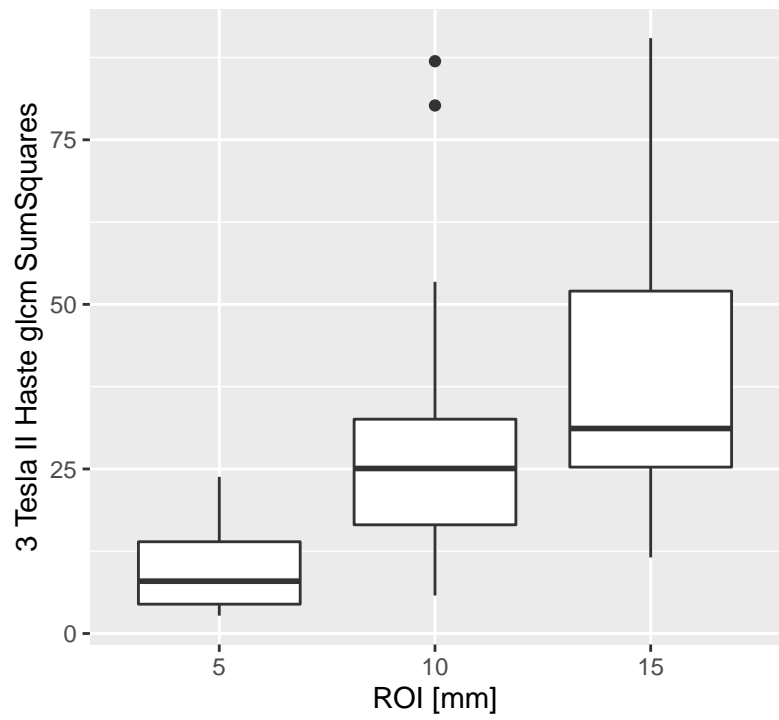

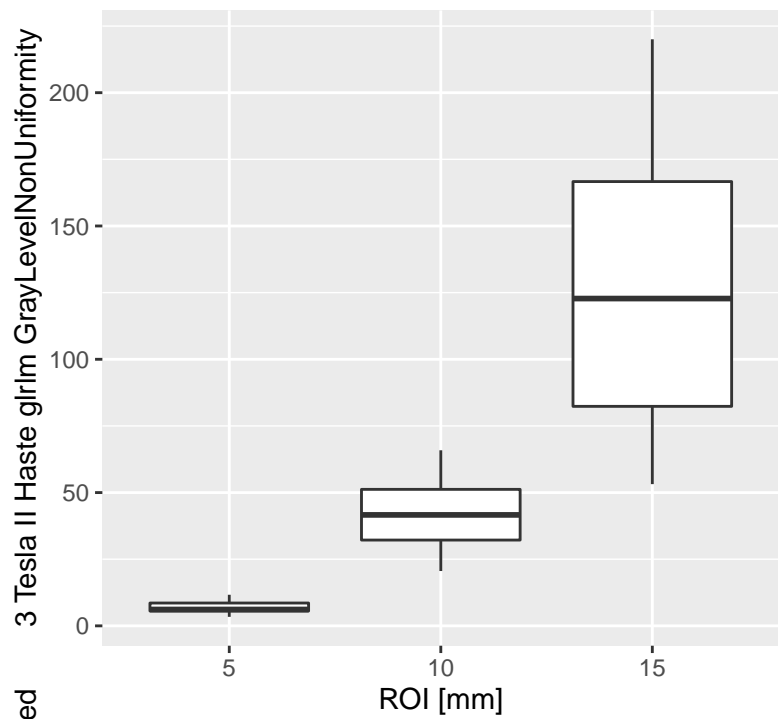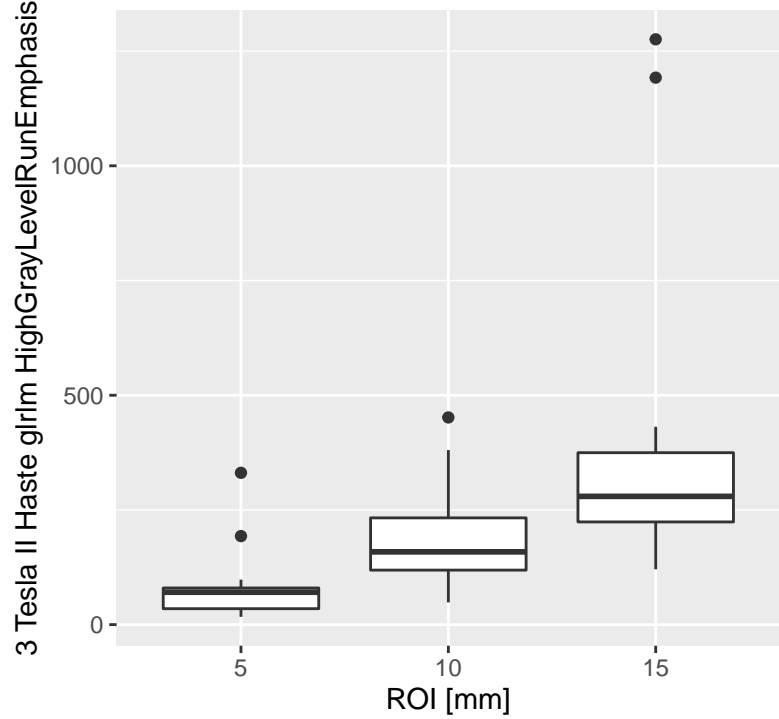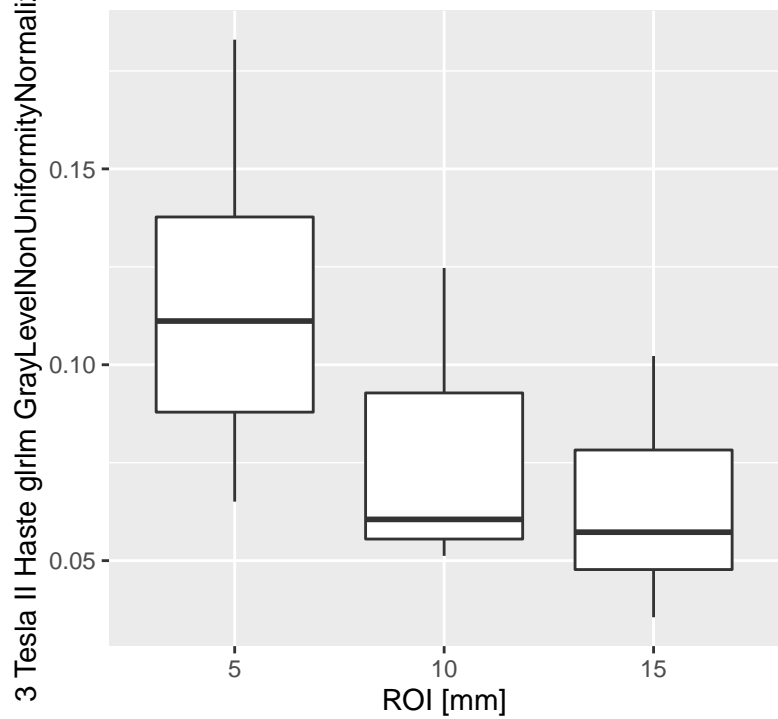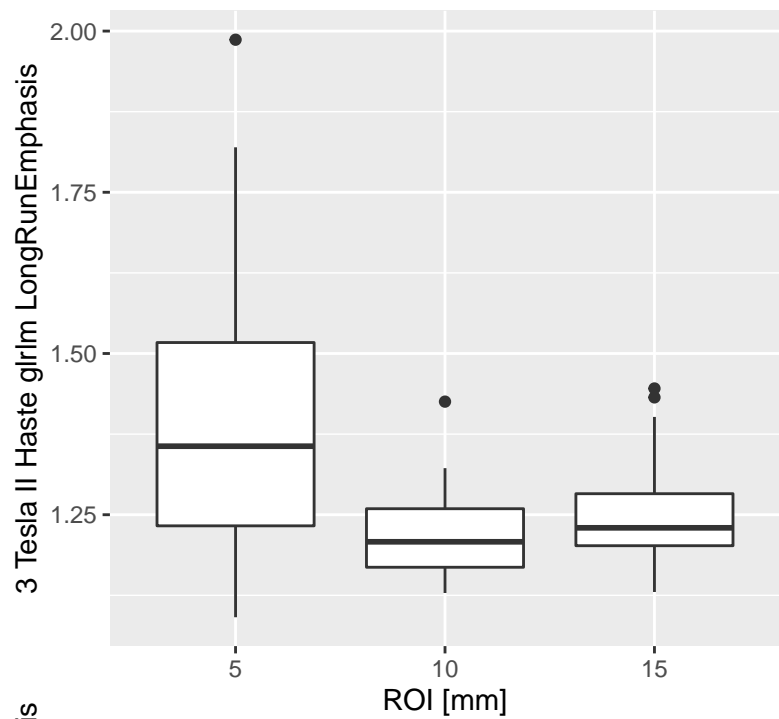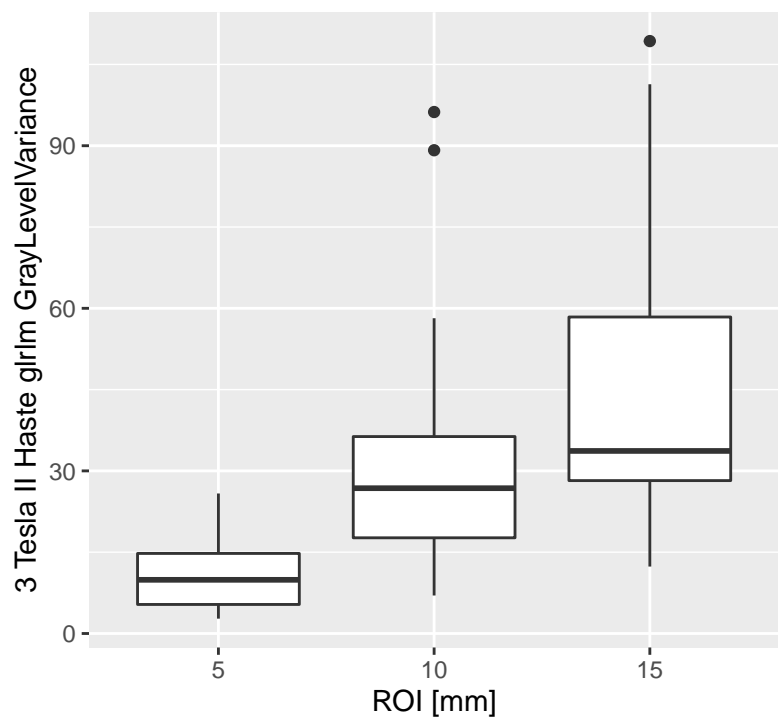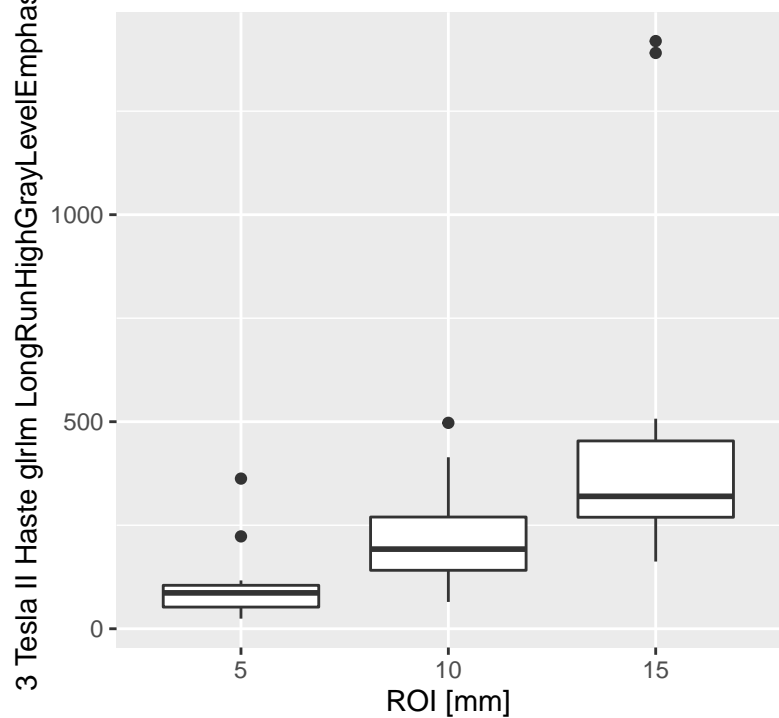

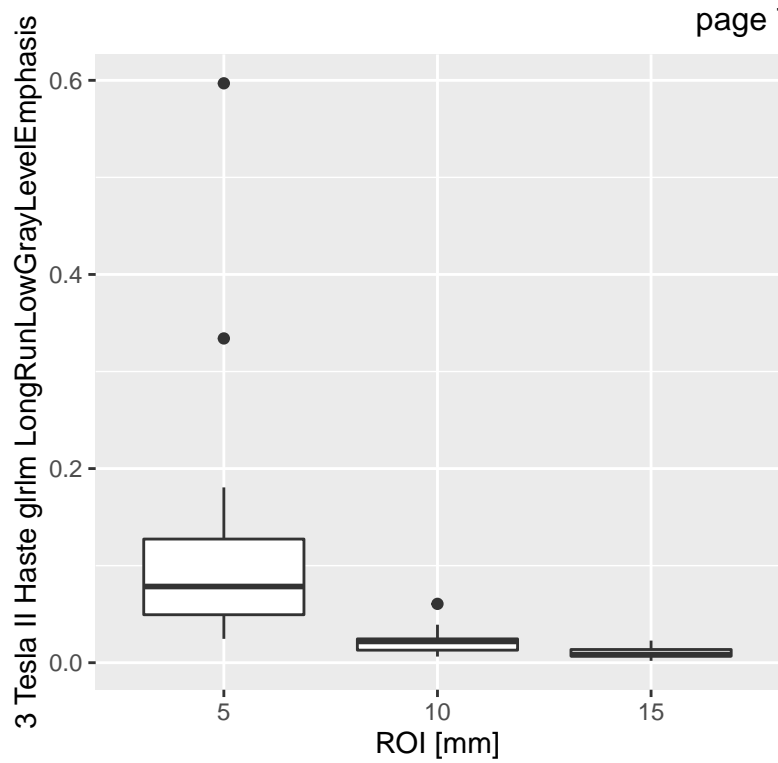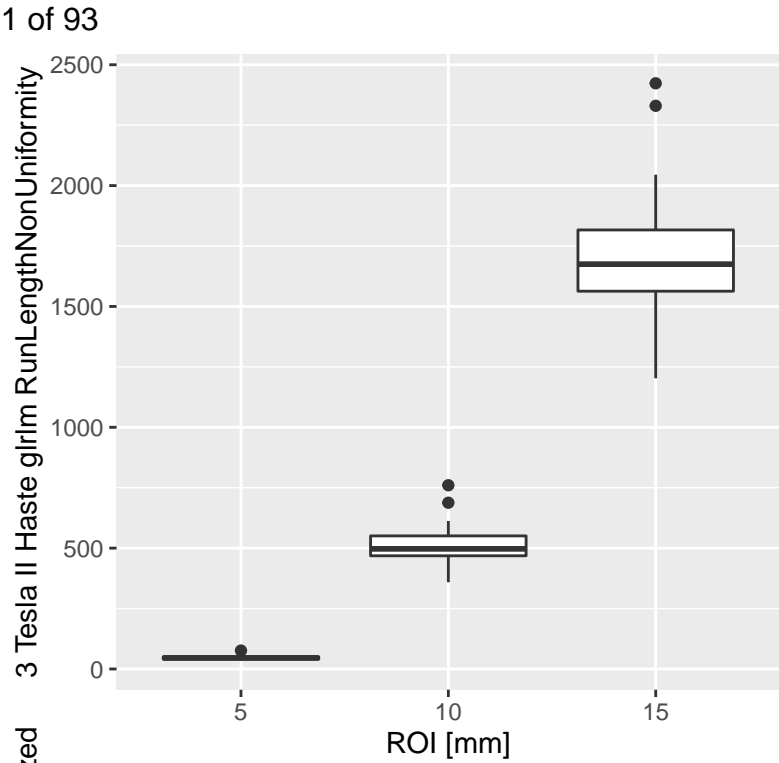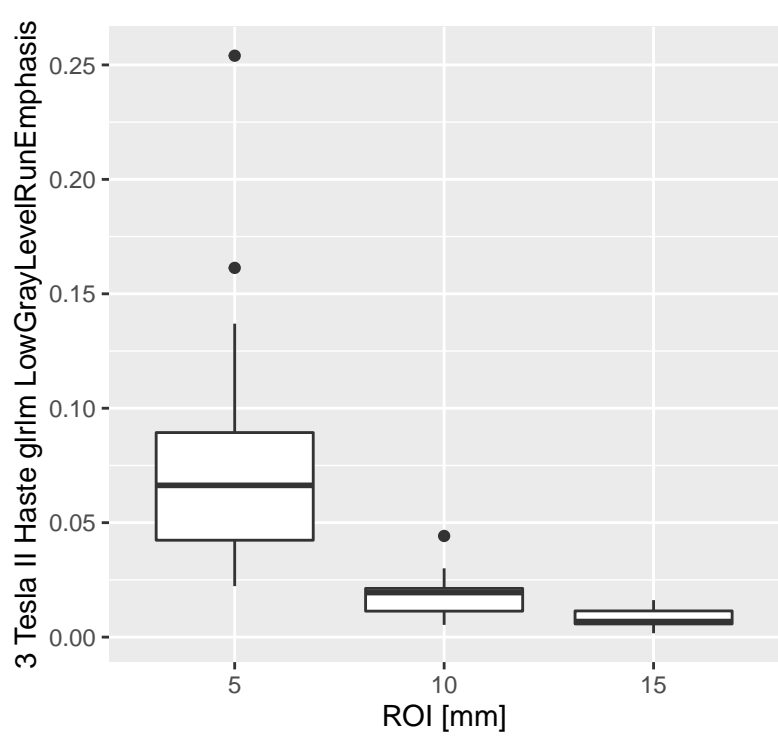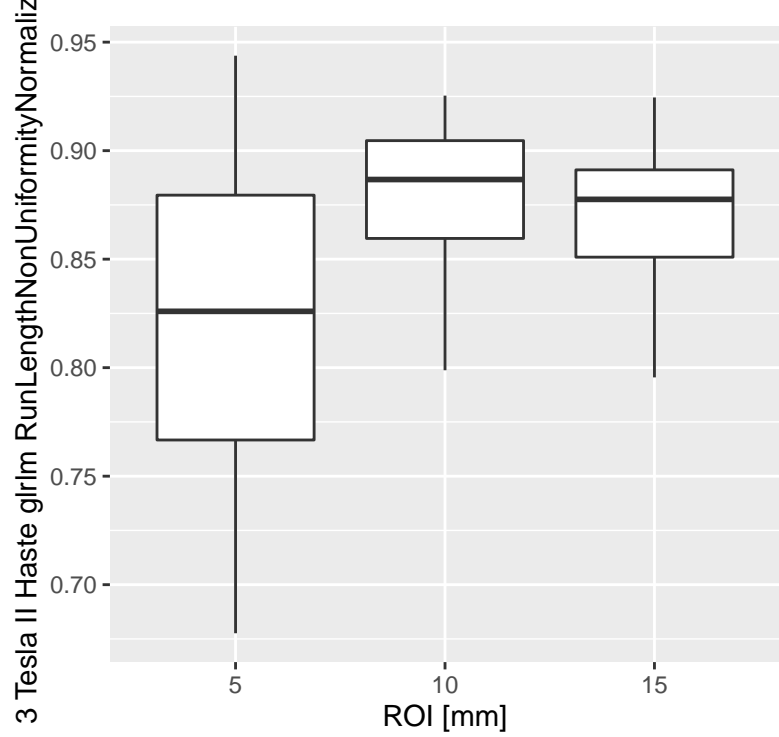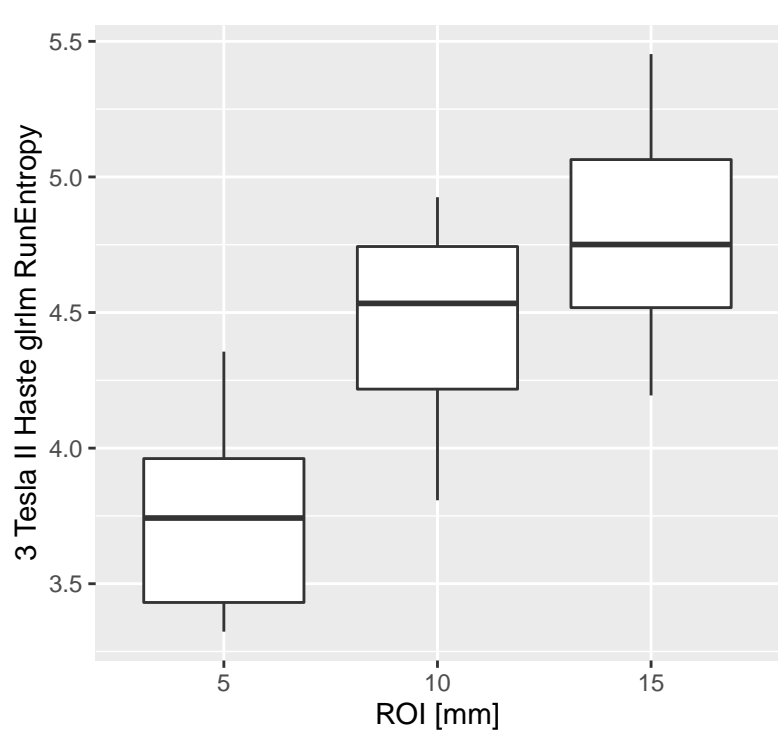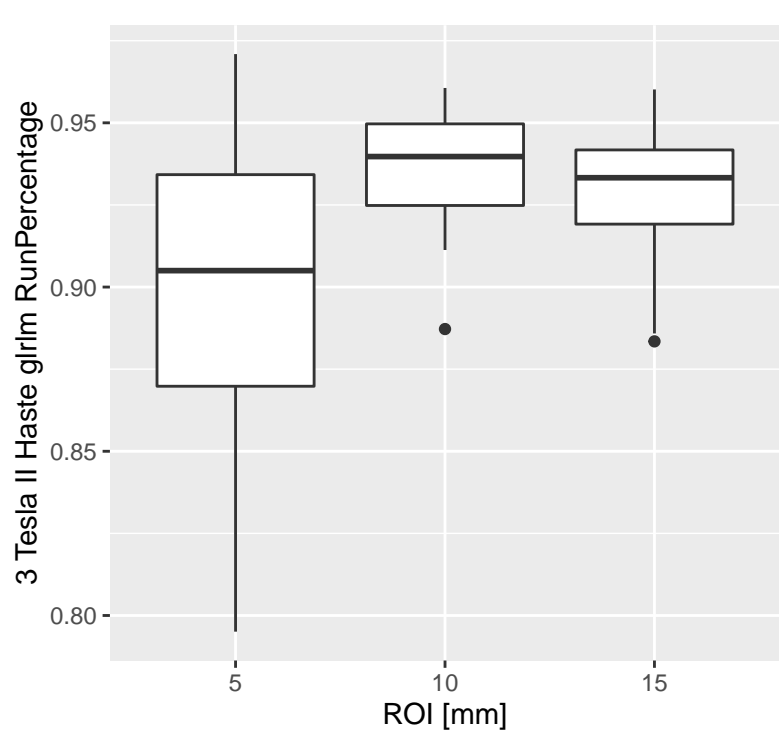

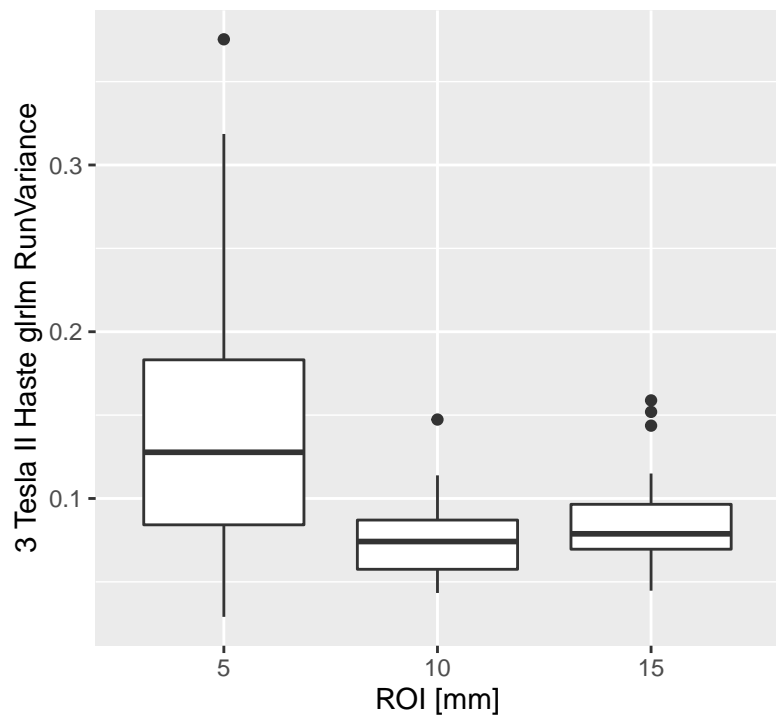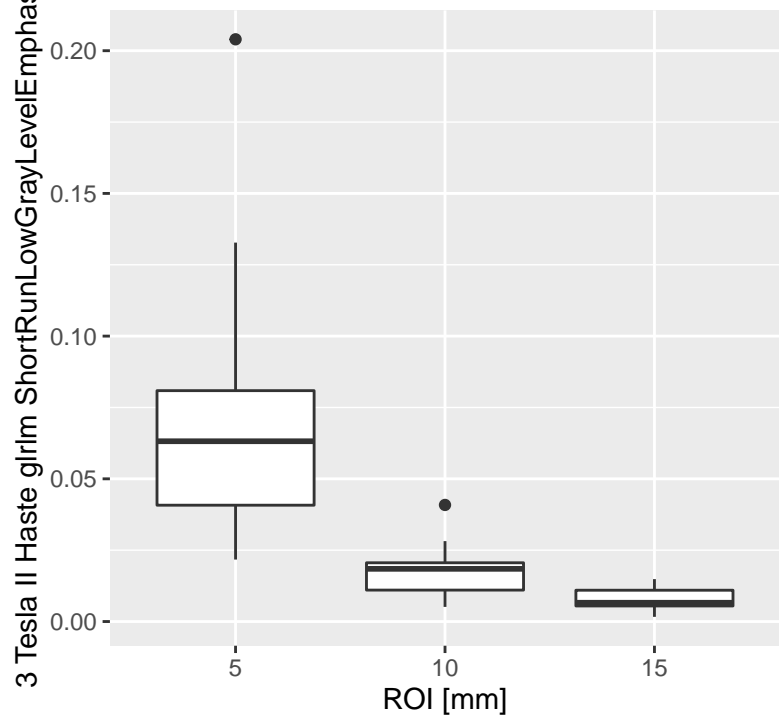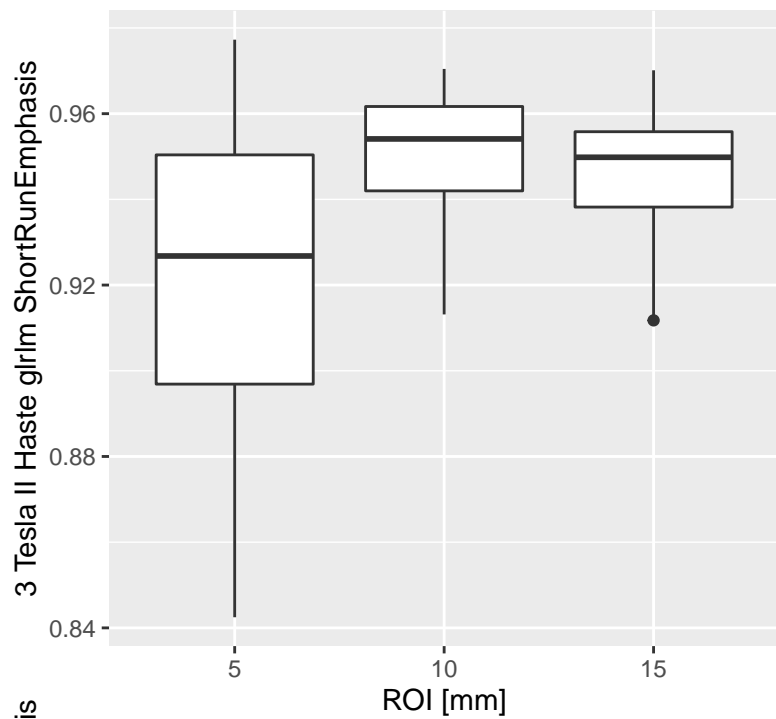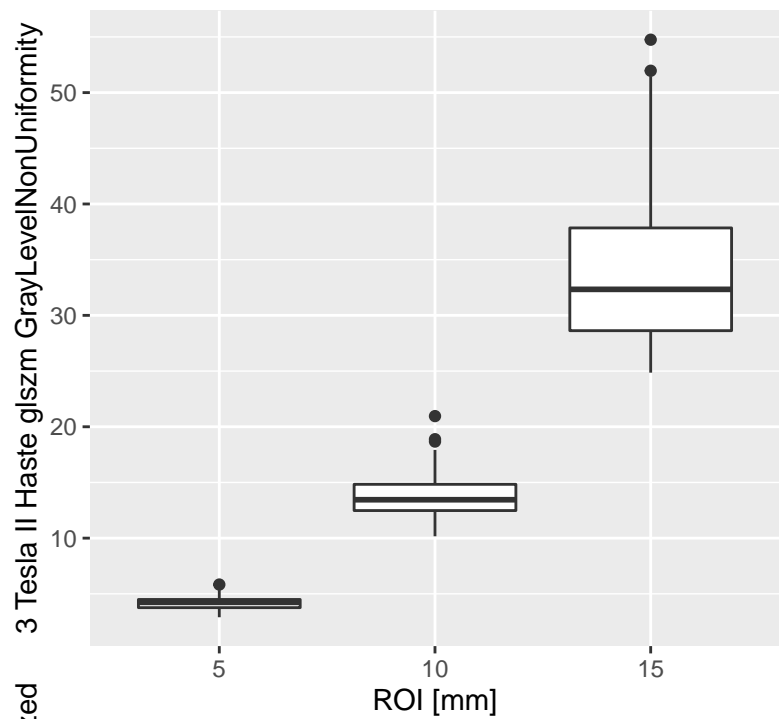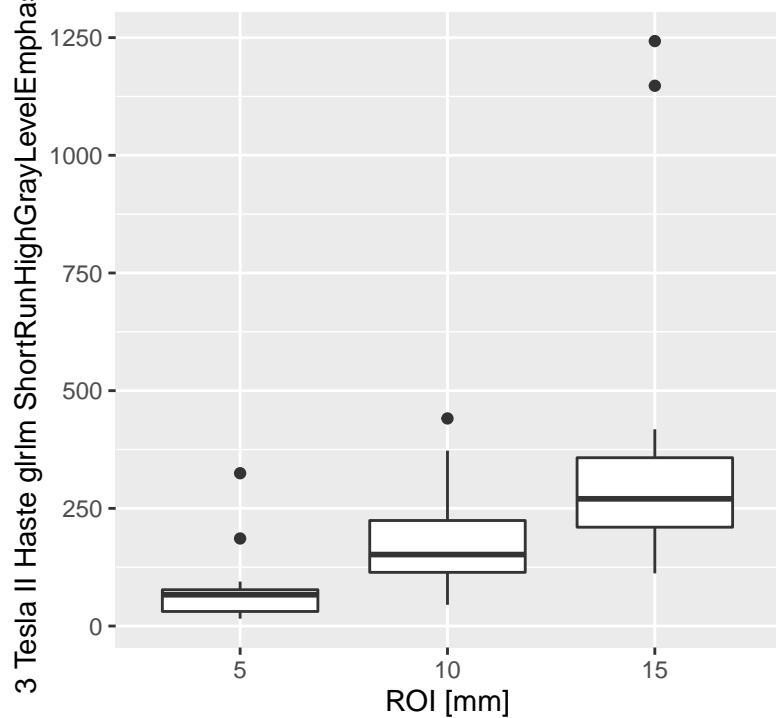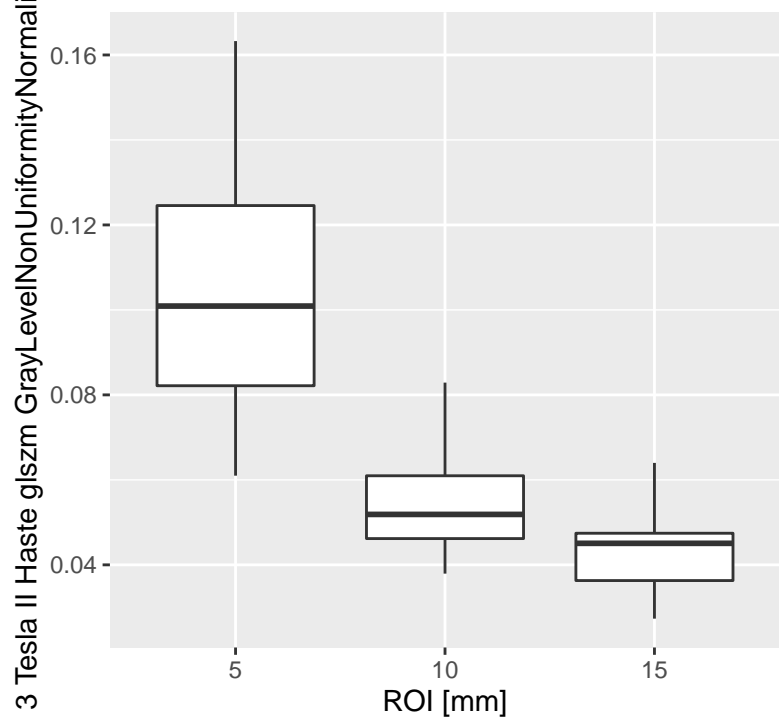



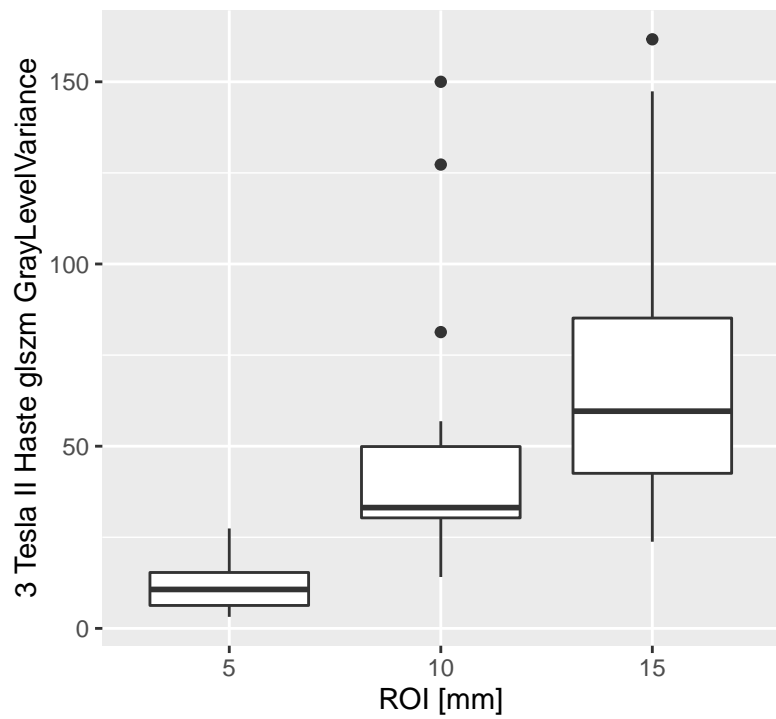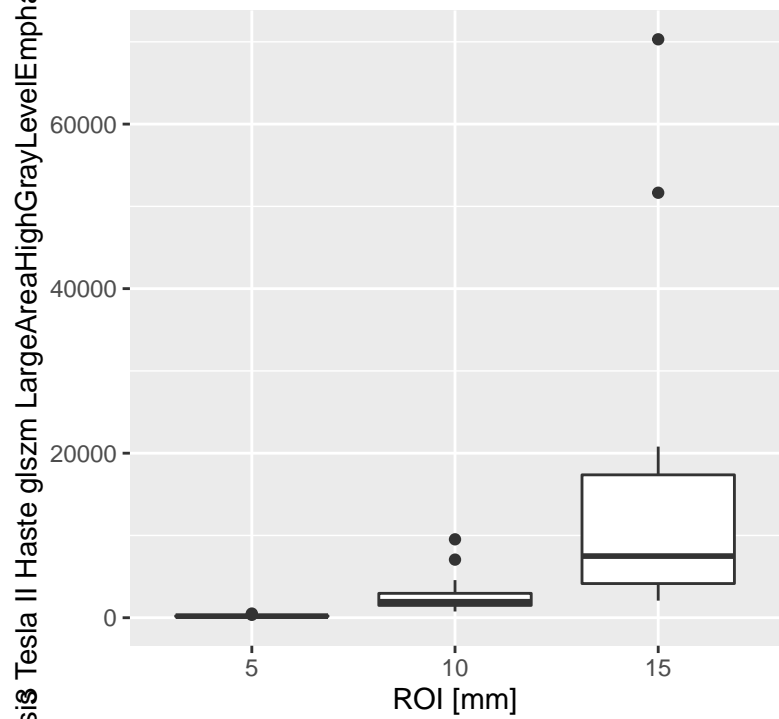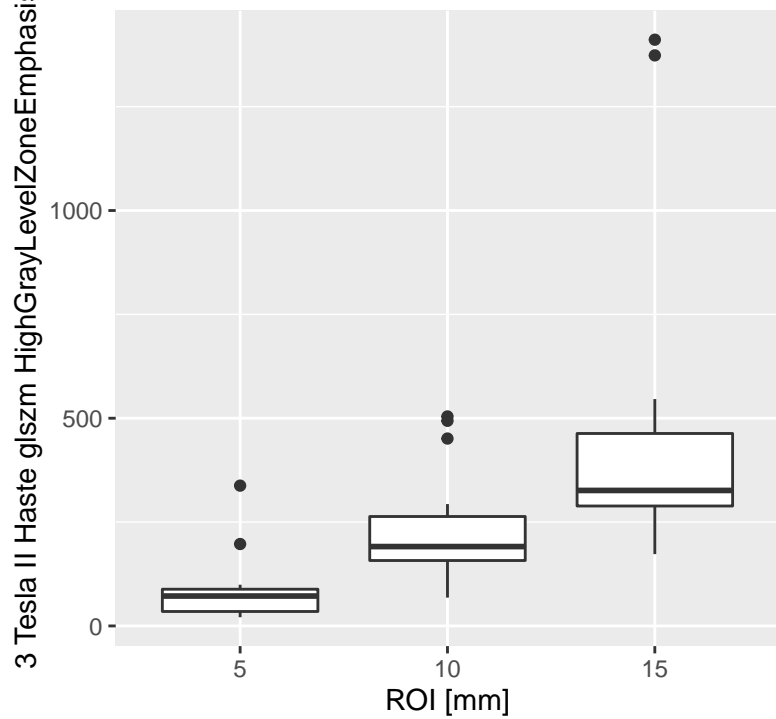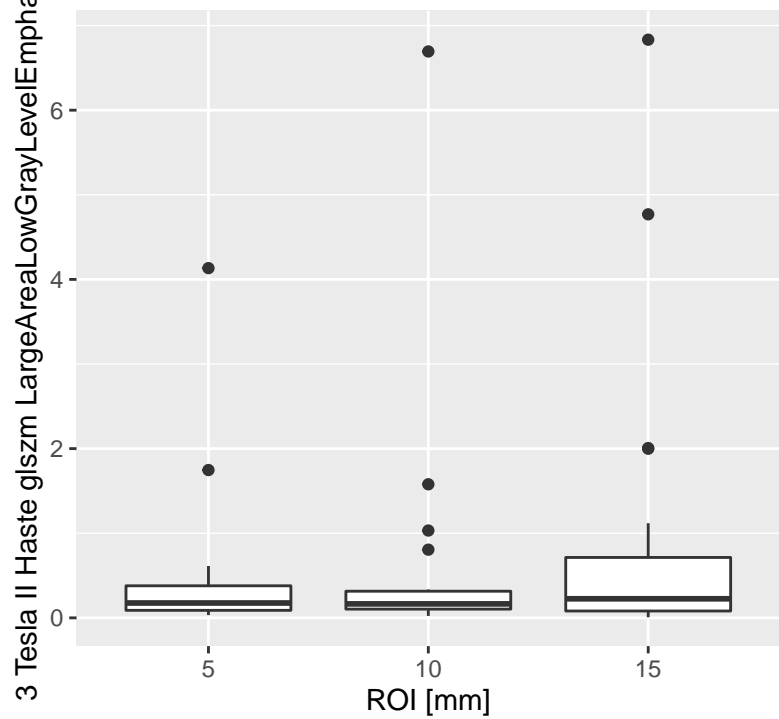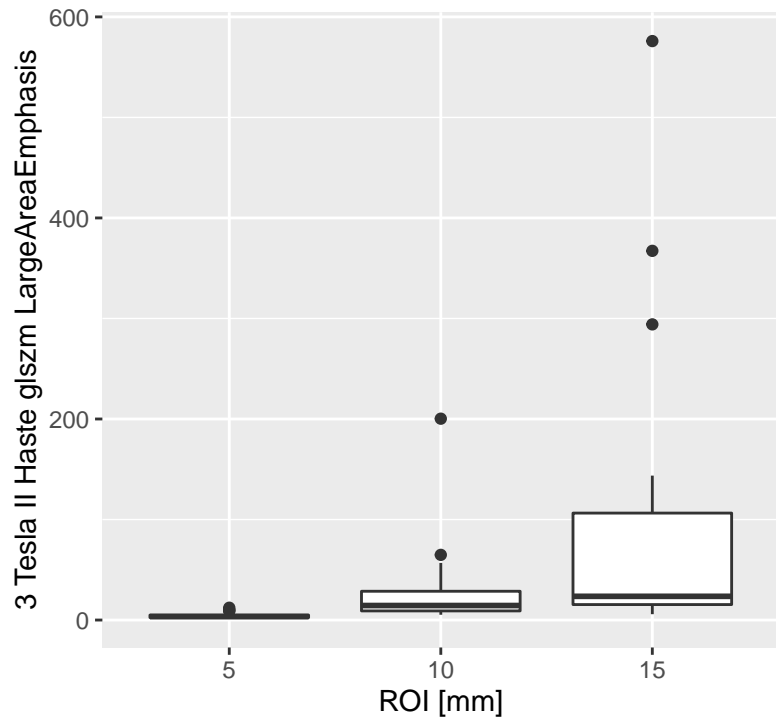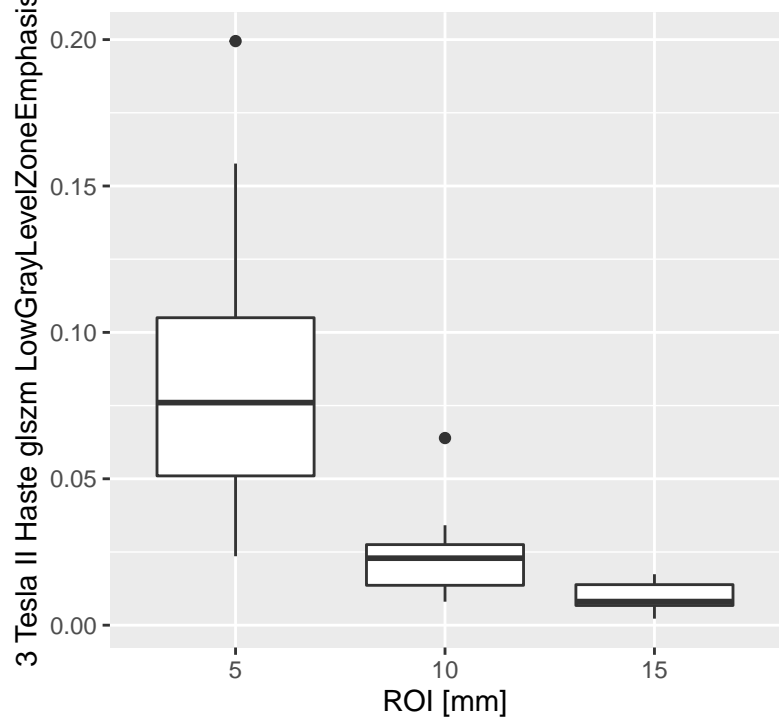

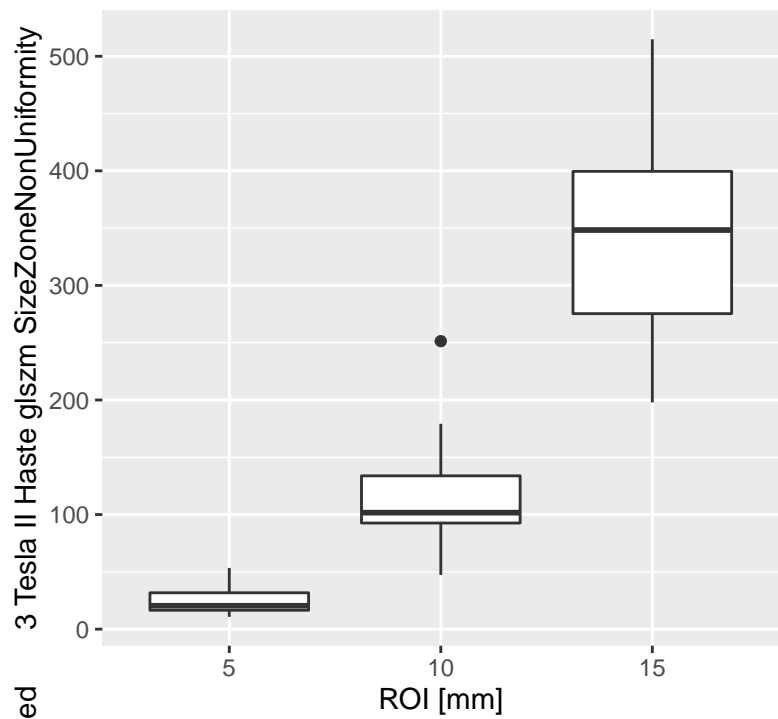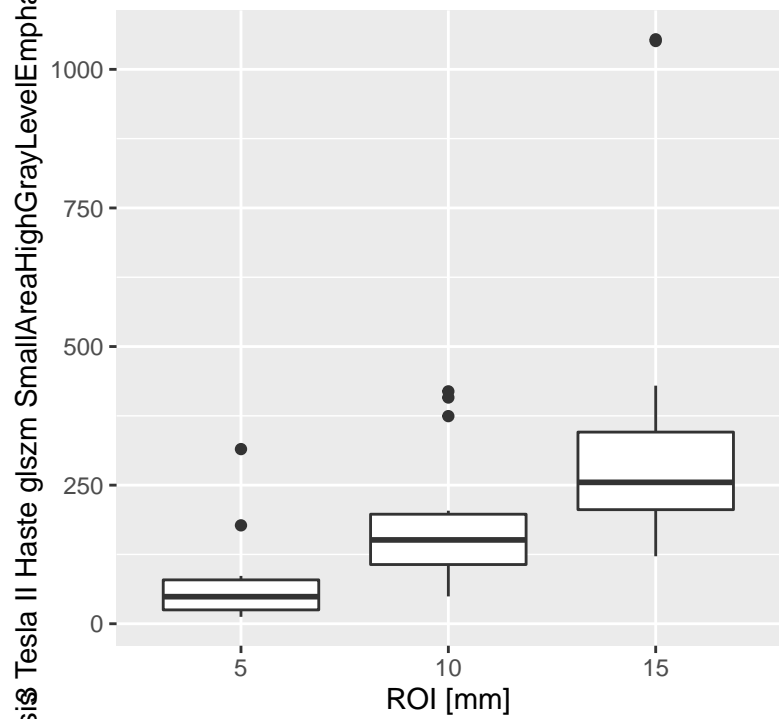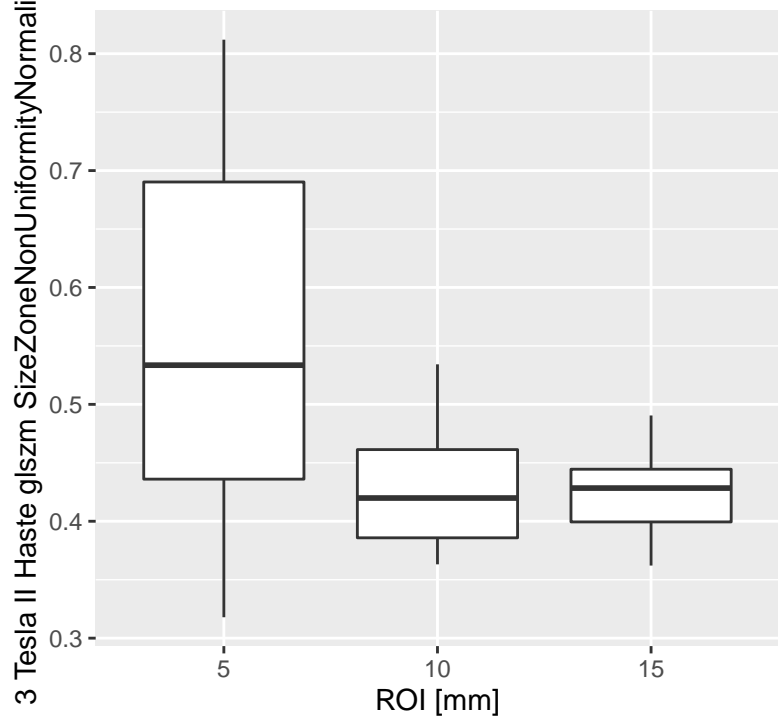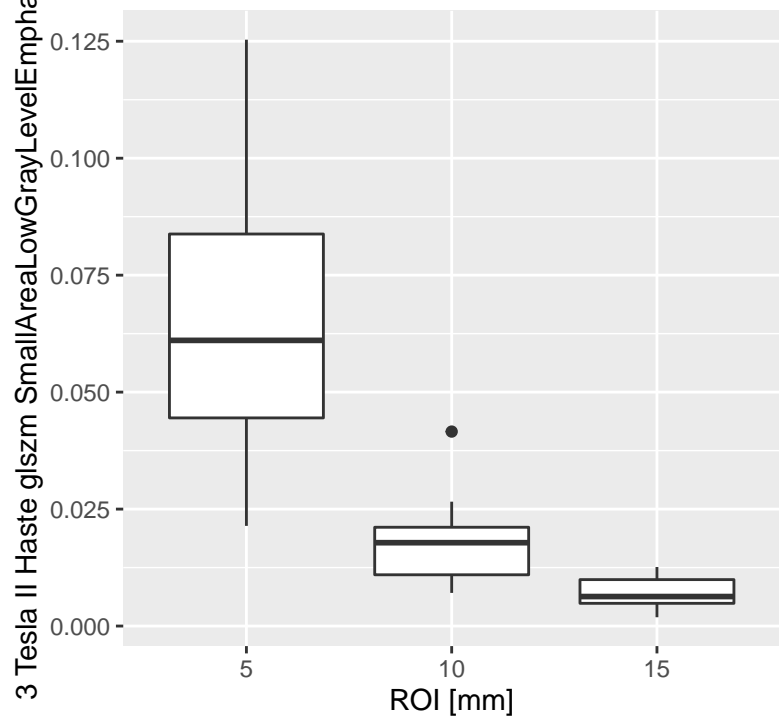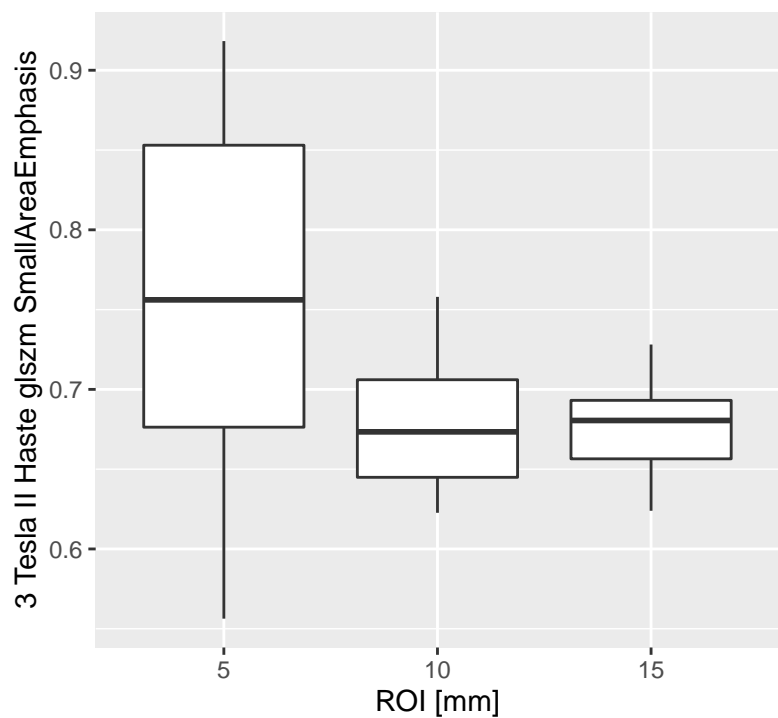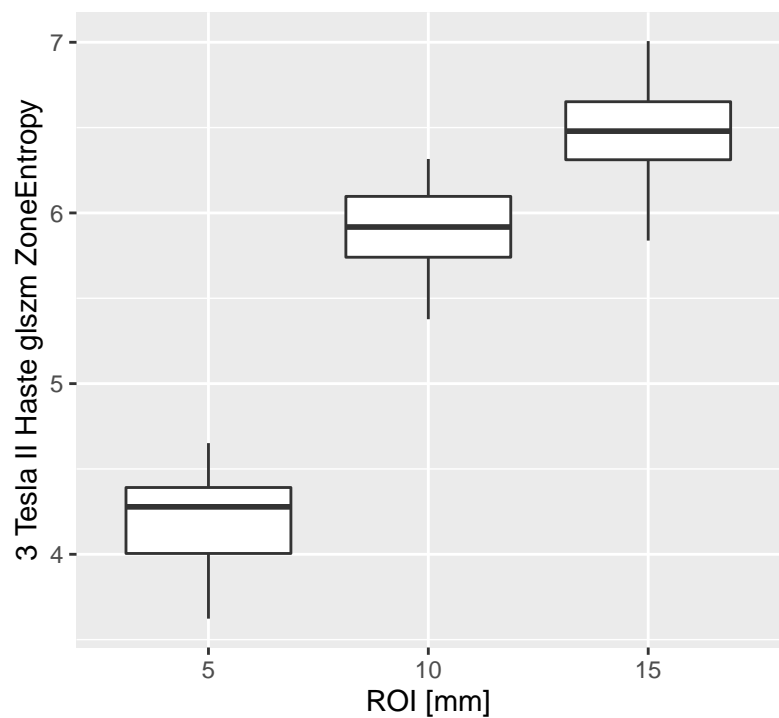

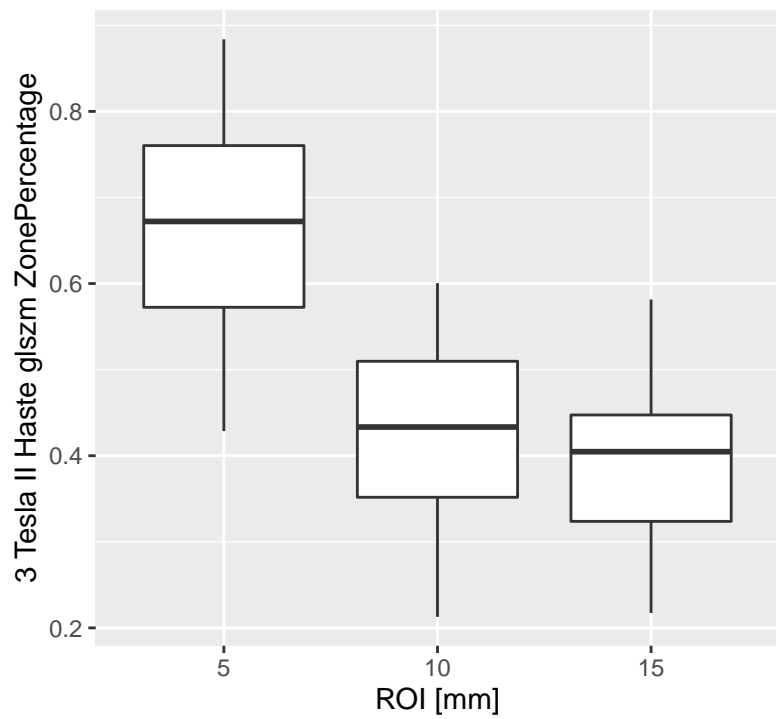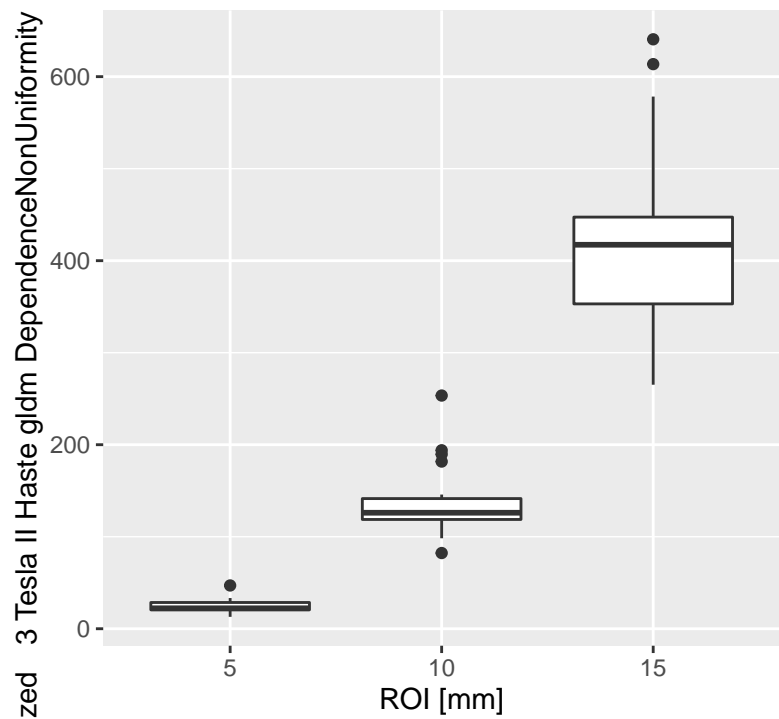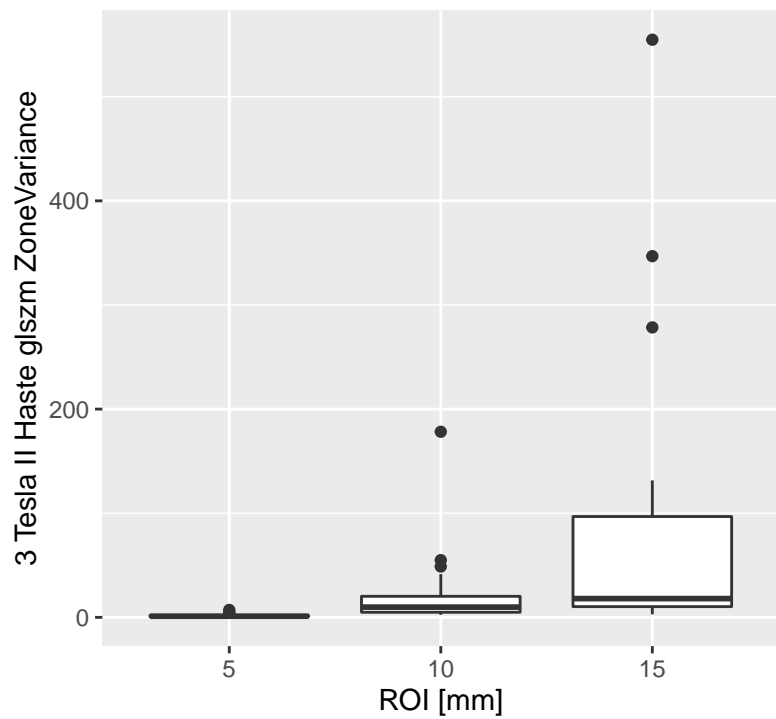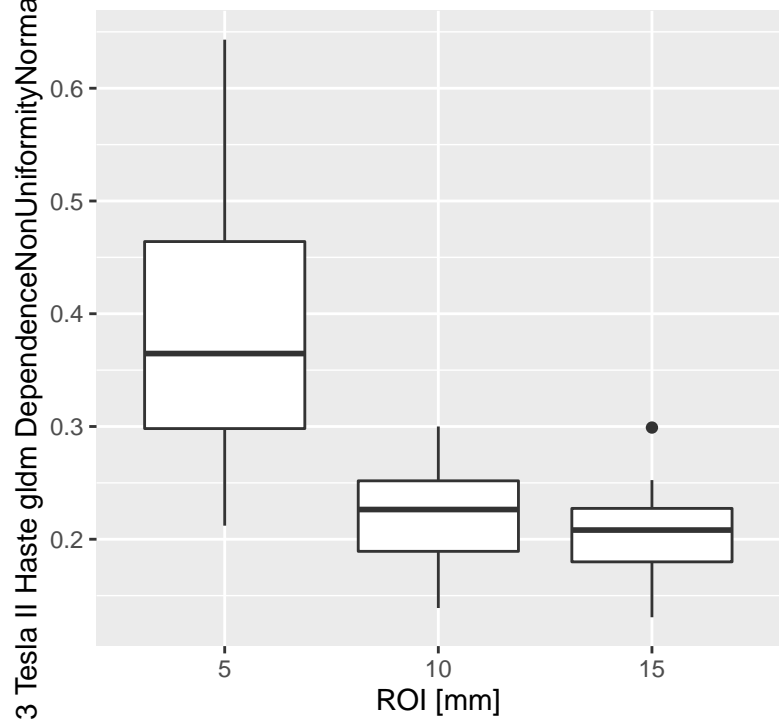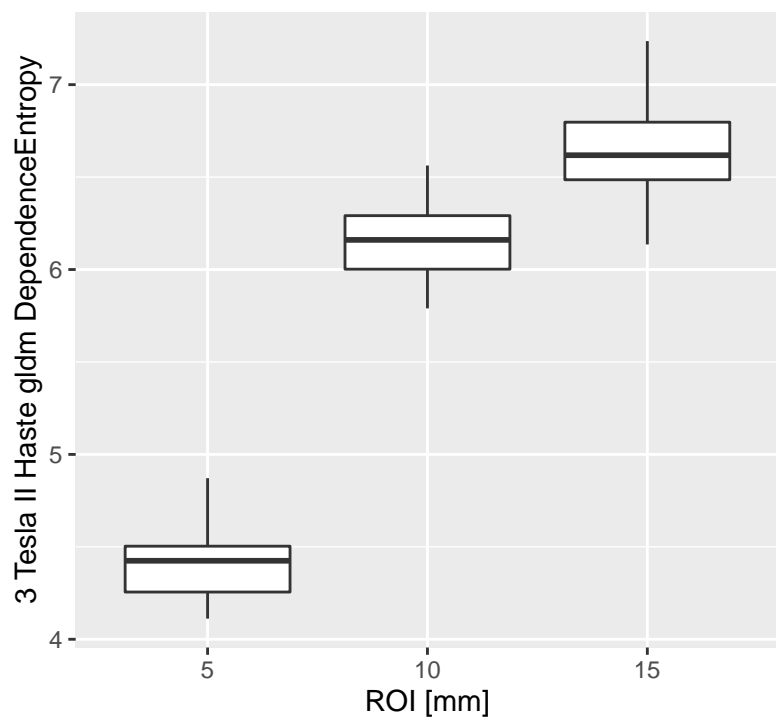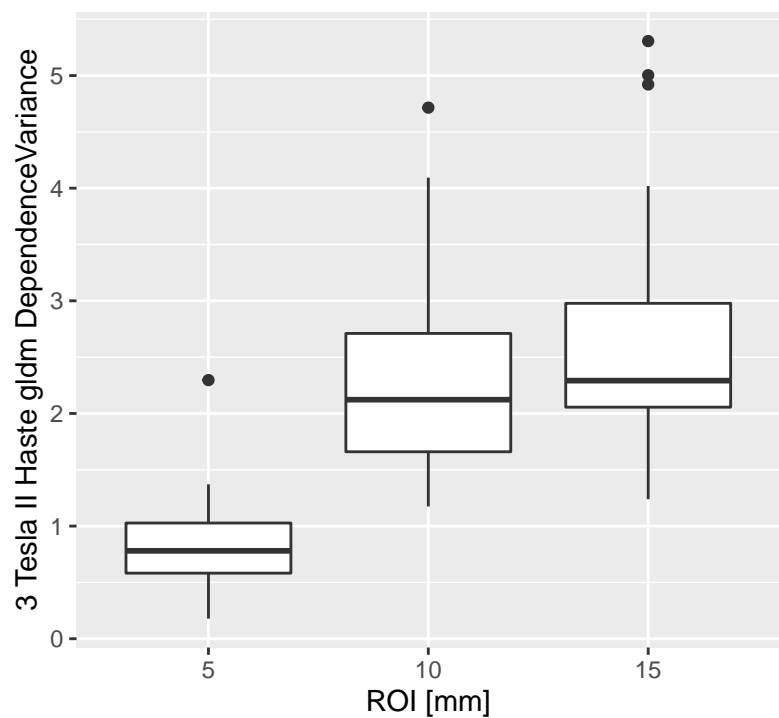

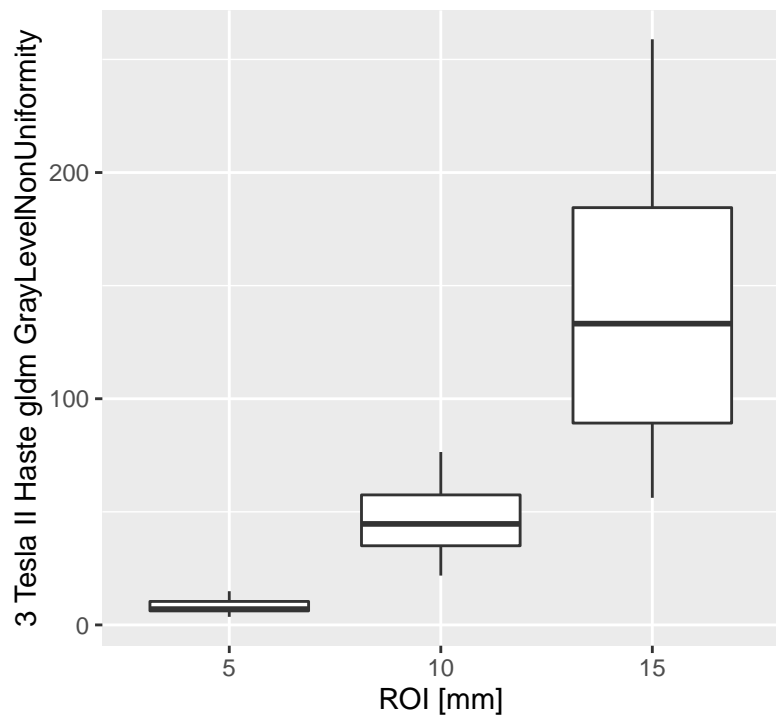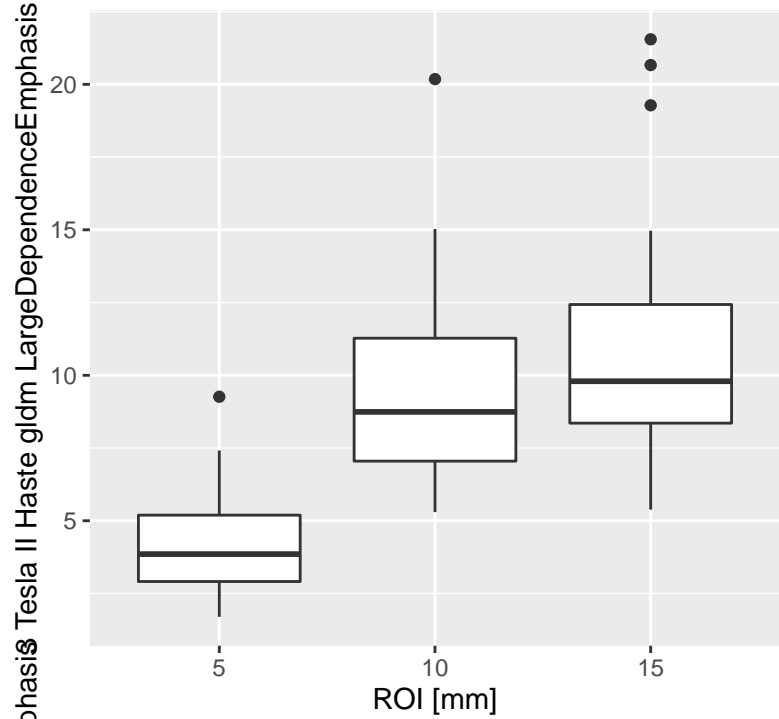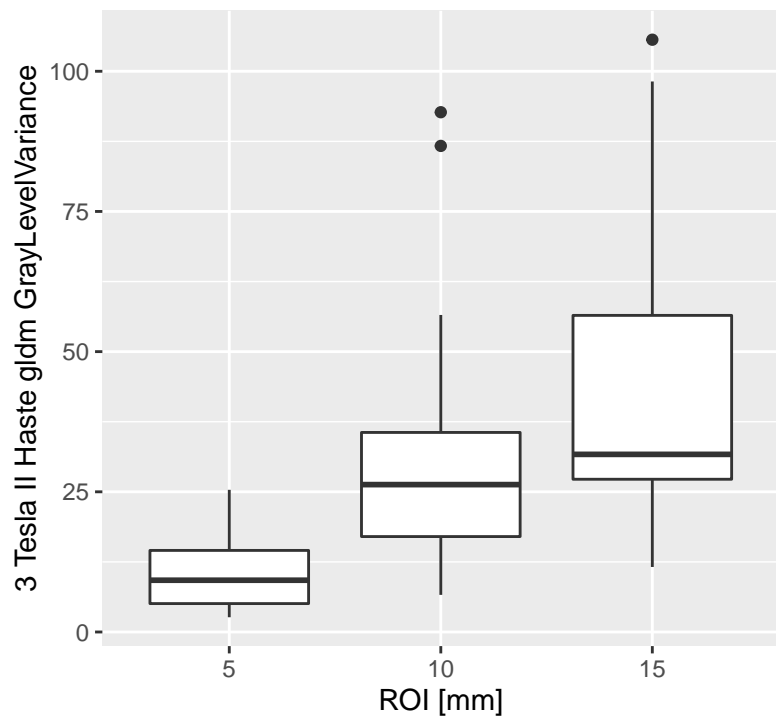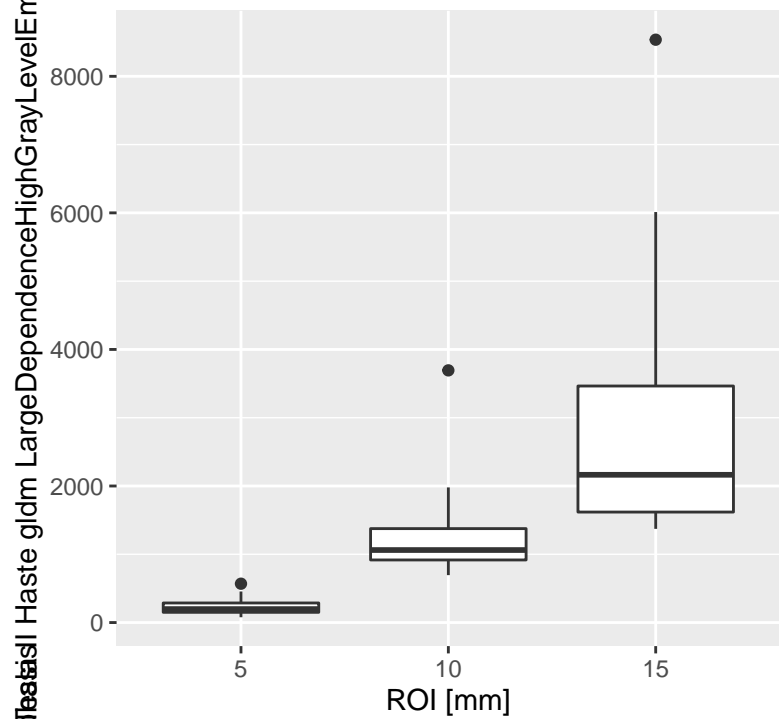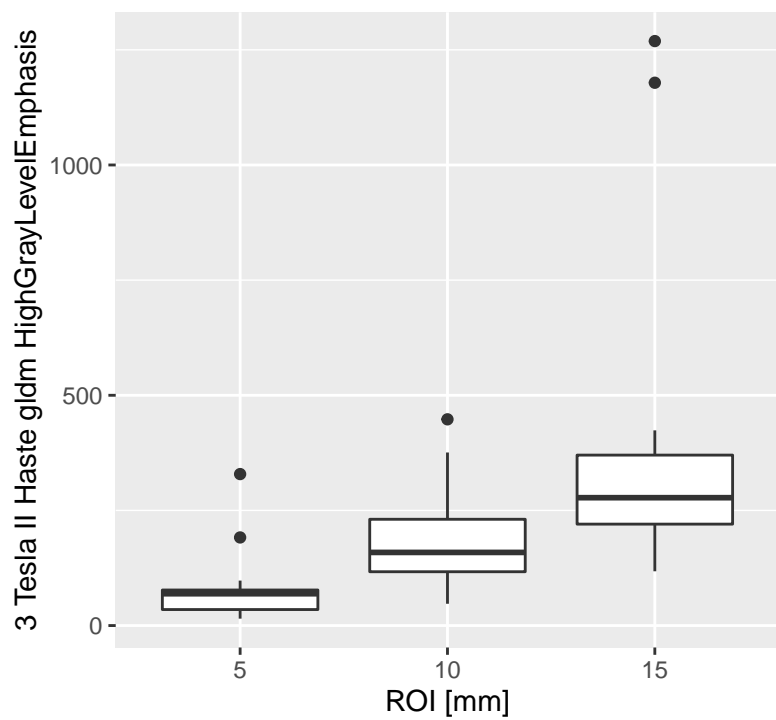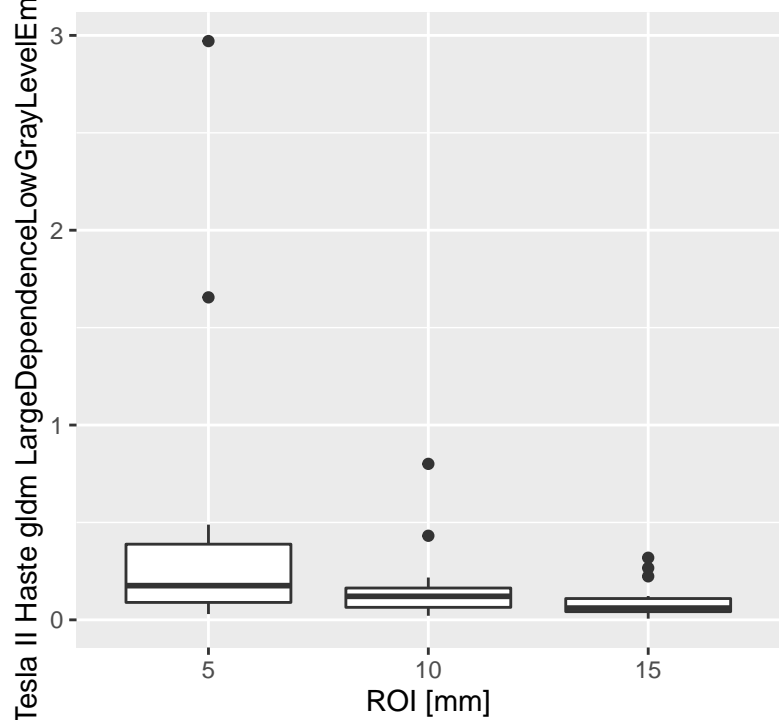

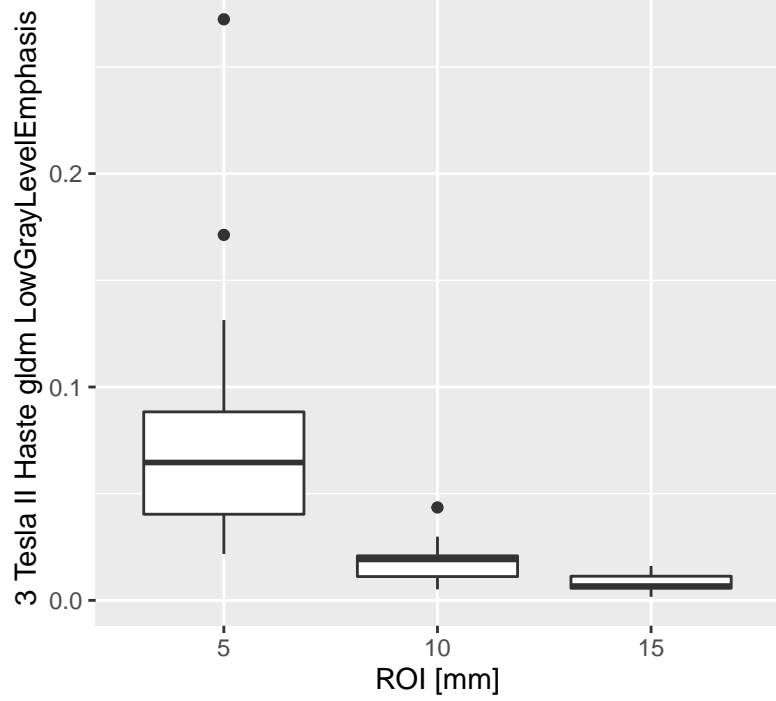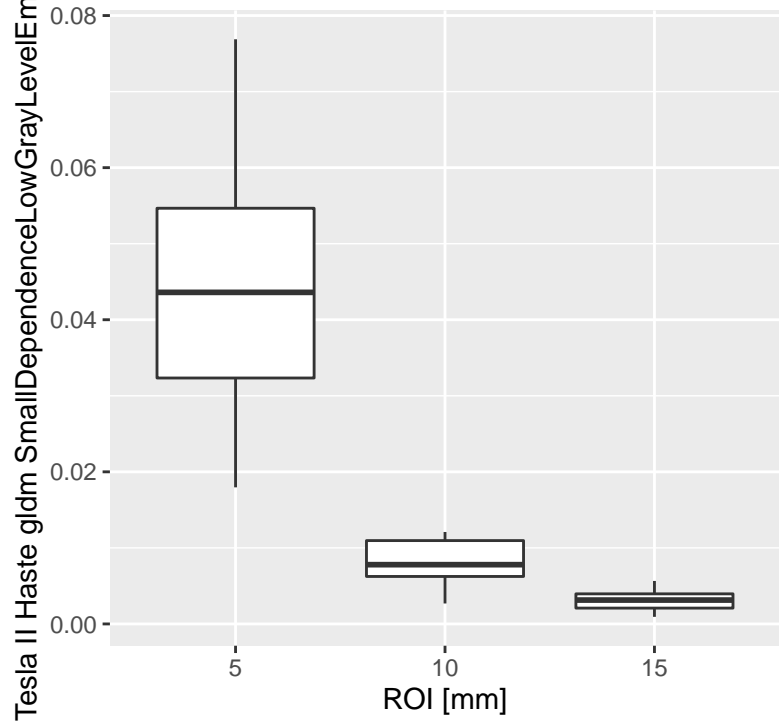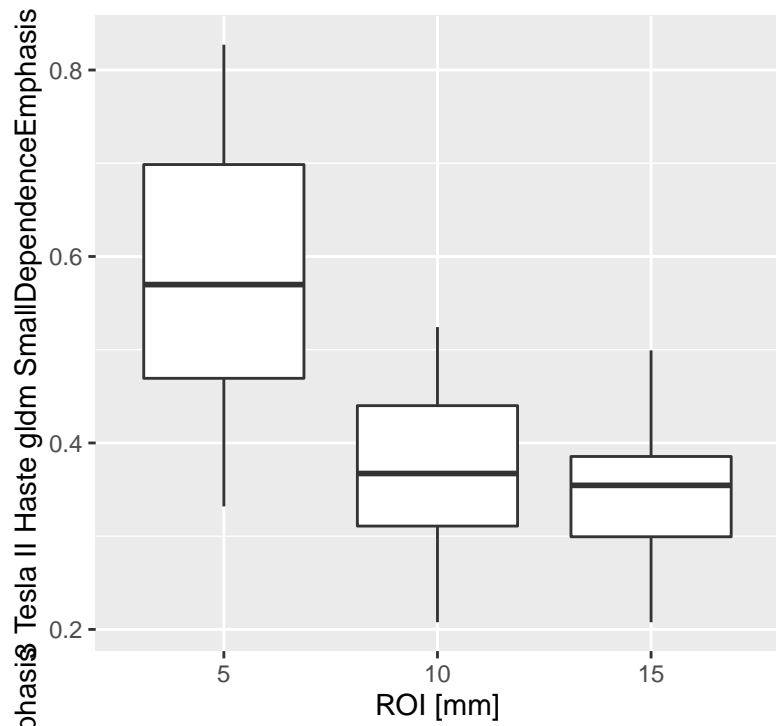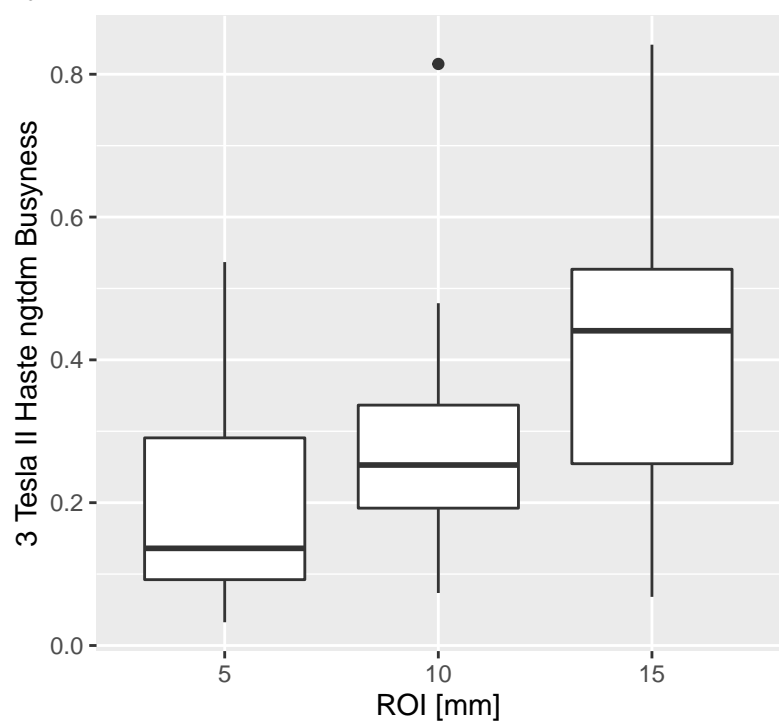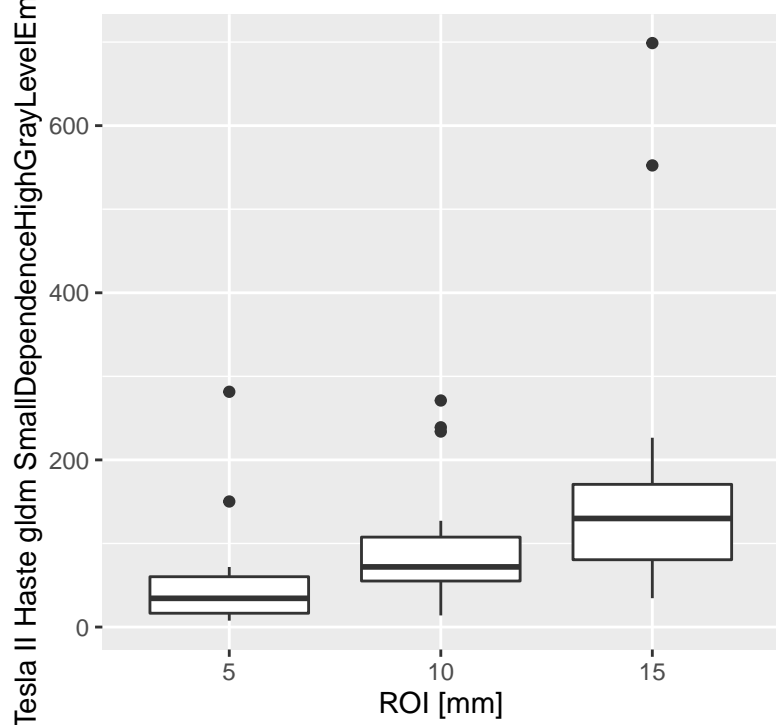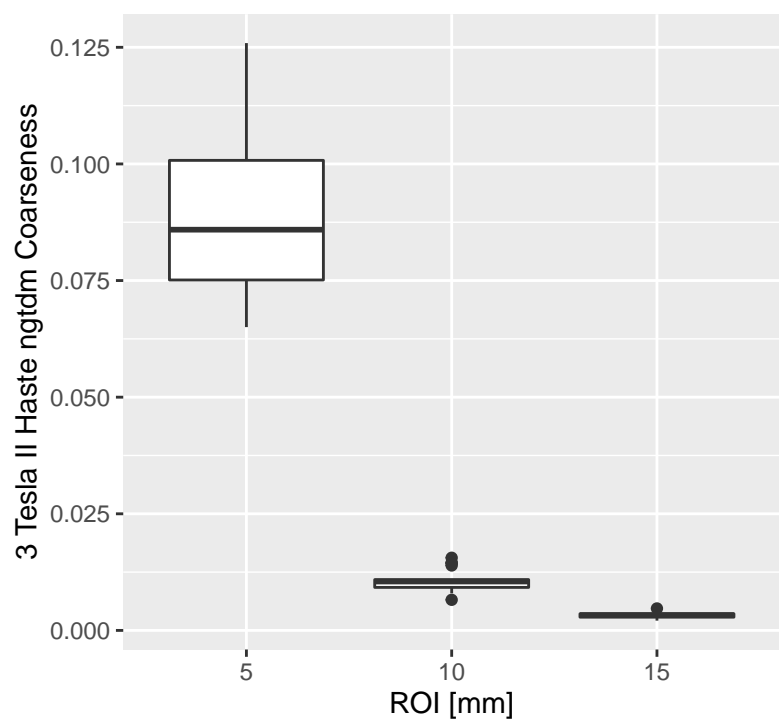

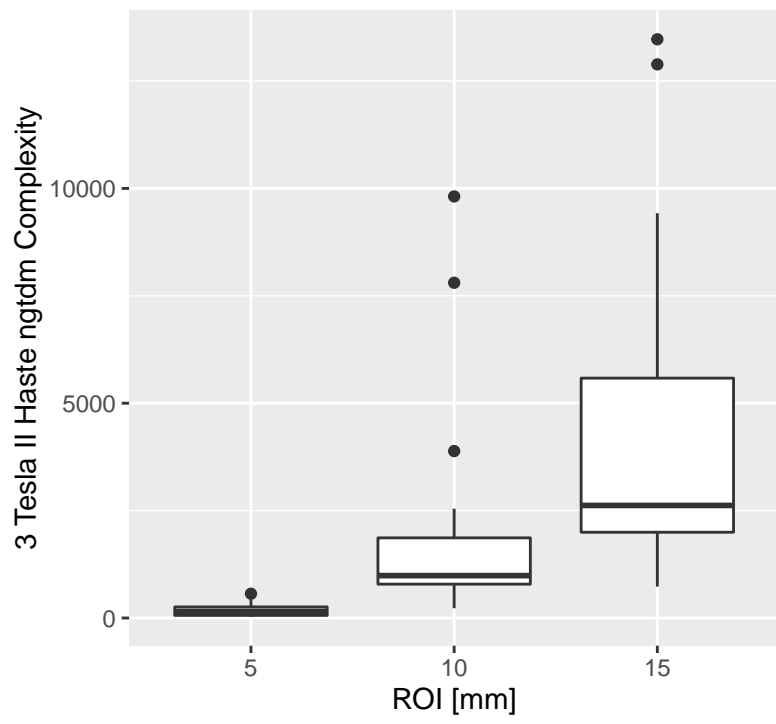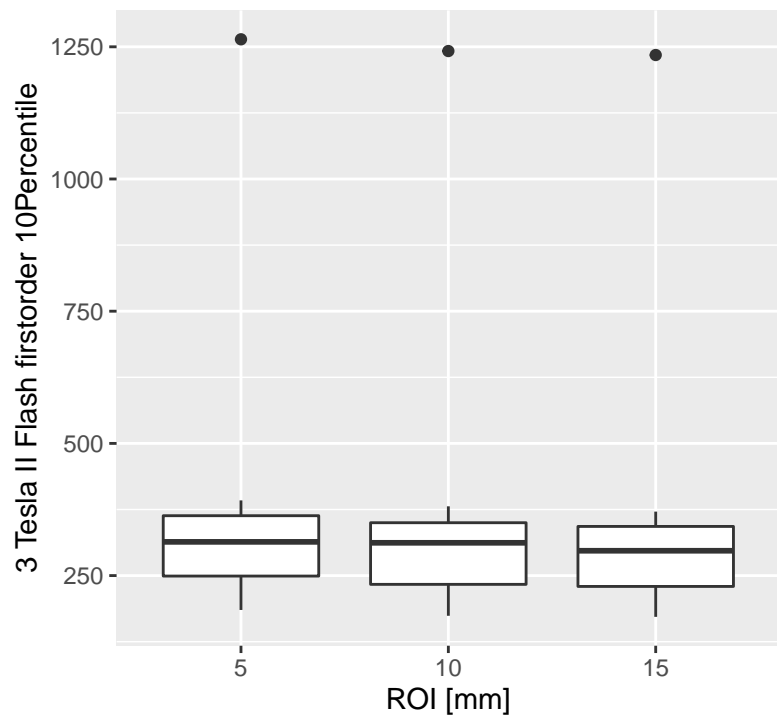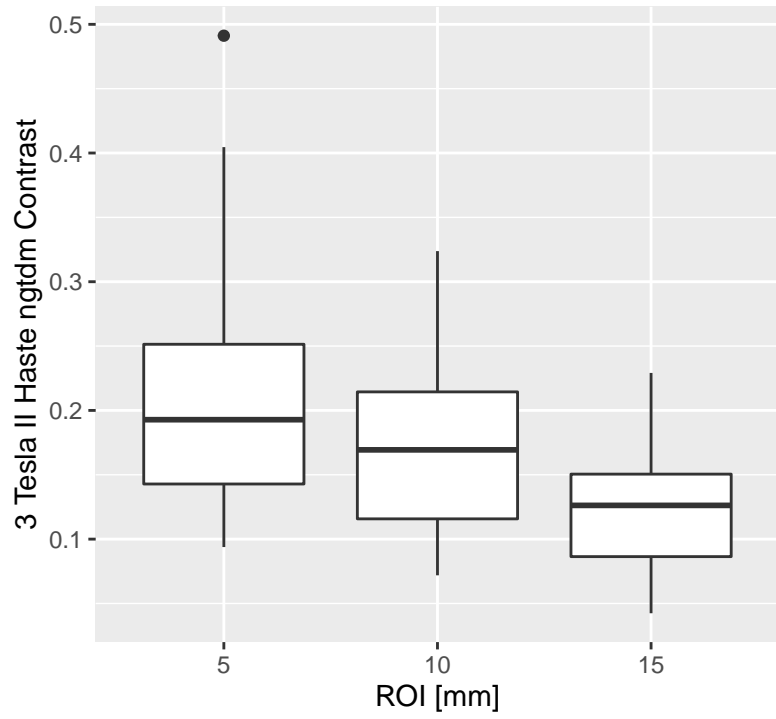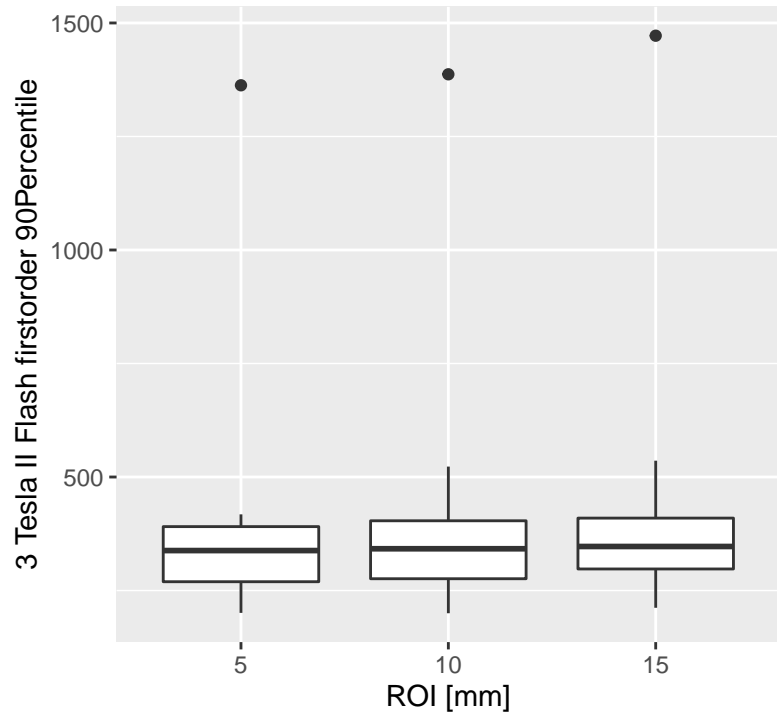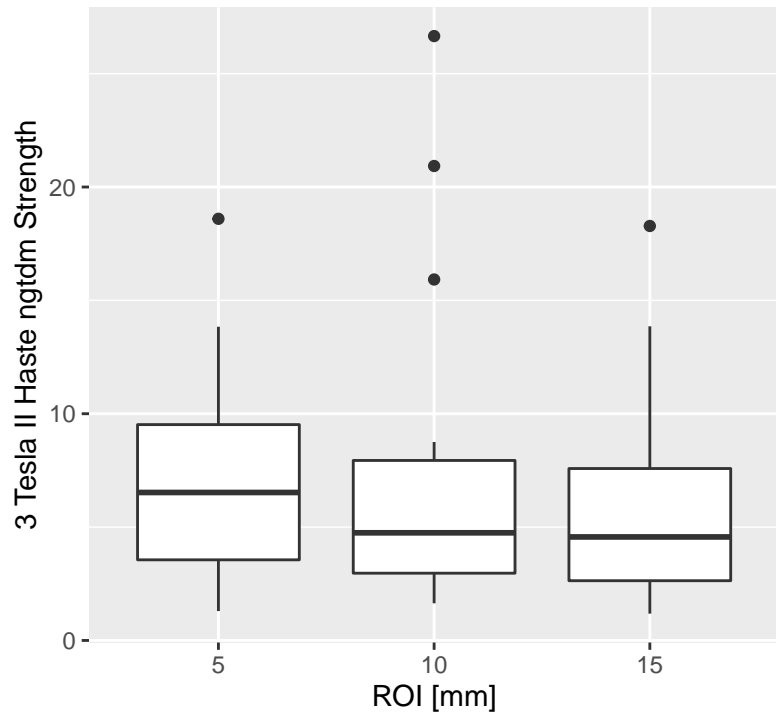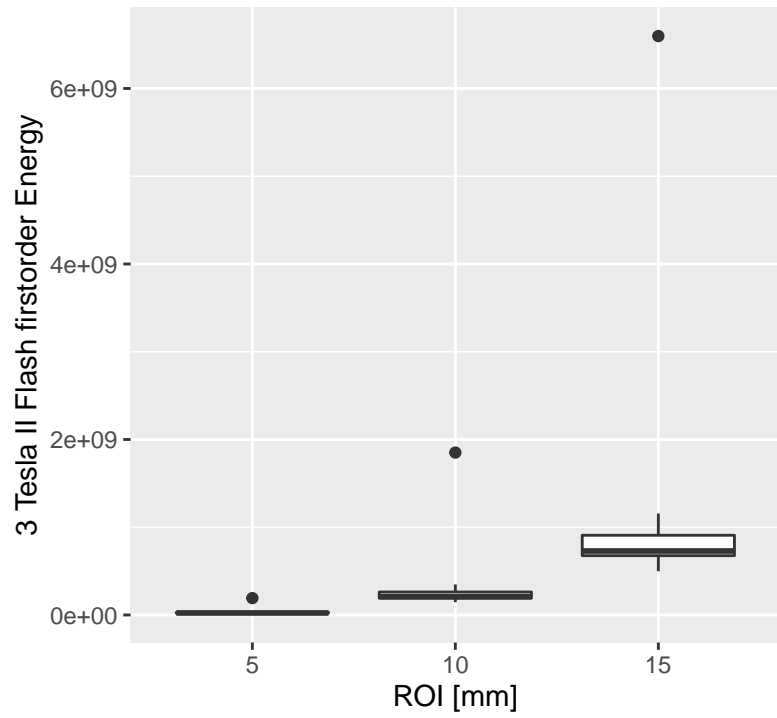

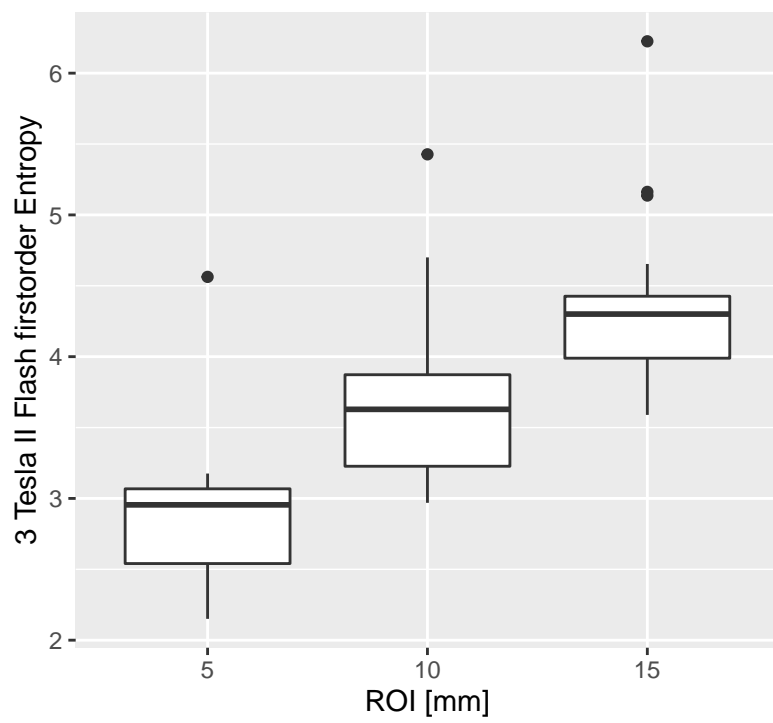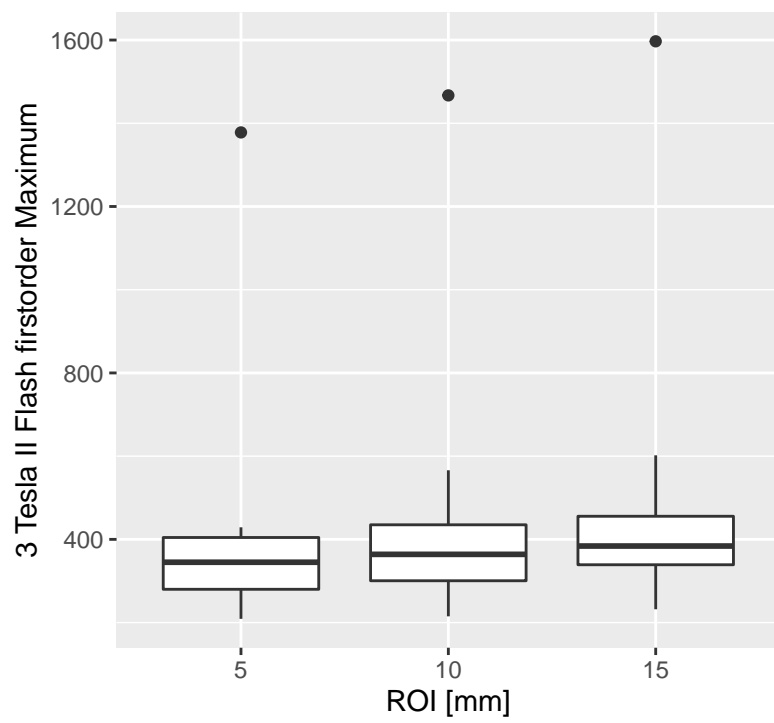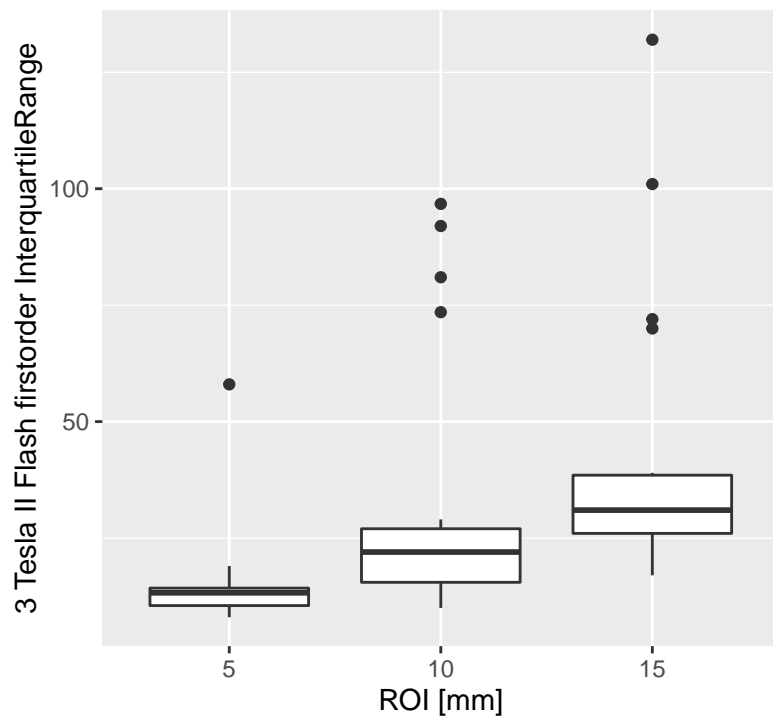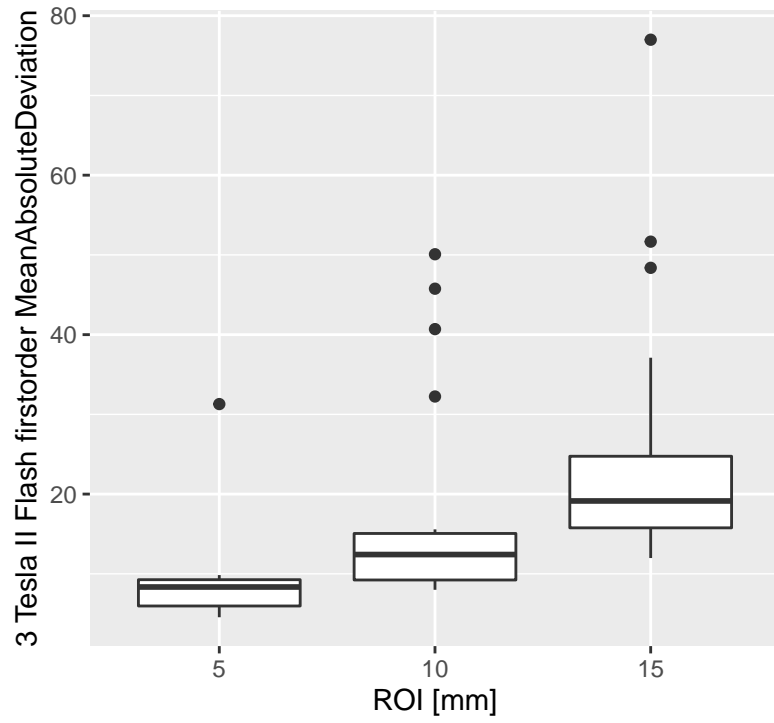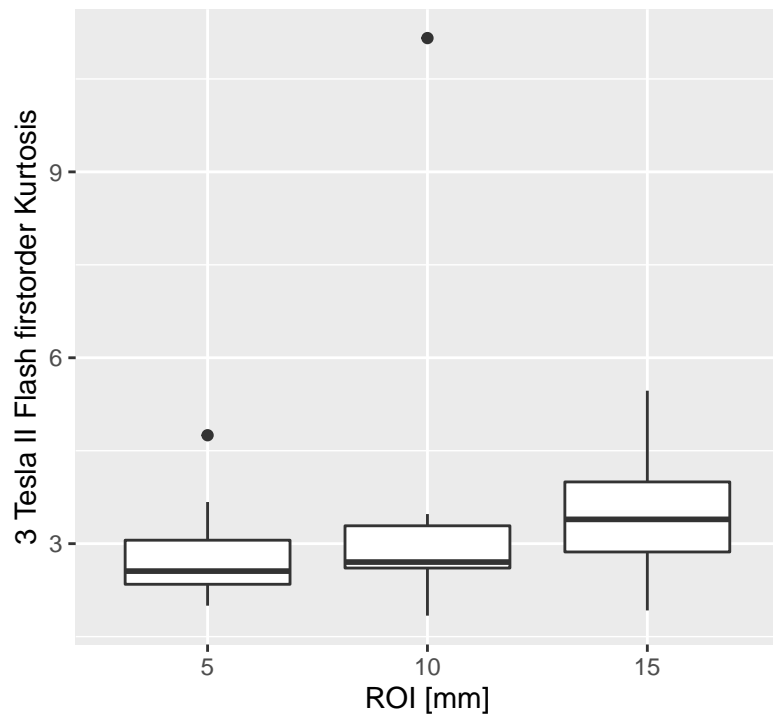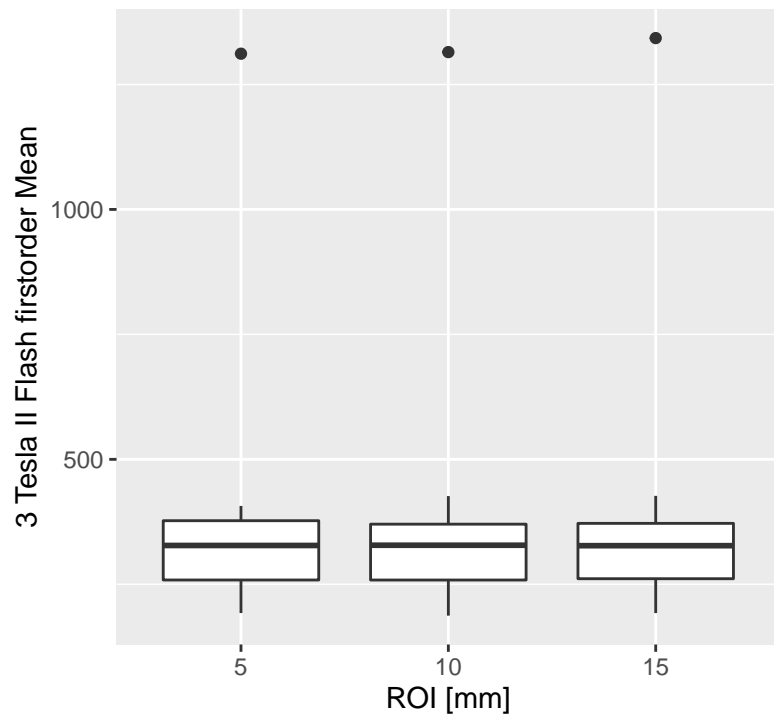

3 Tesla II Flash firstorder Median

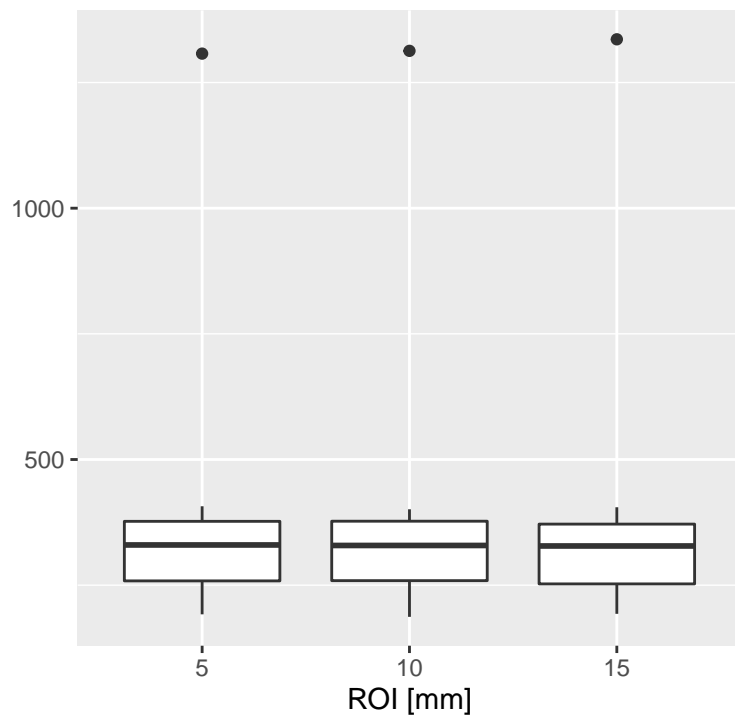

3 Tesla II Flash firstorder RobustMeanAbsoluteDeviation

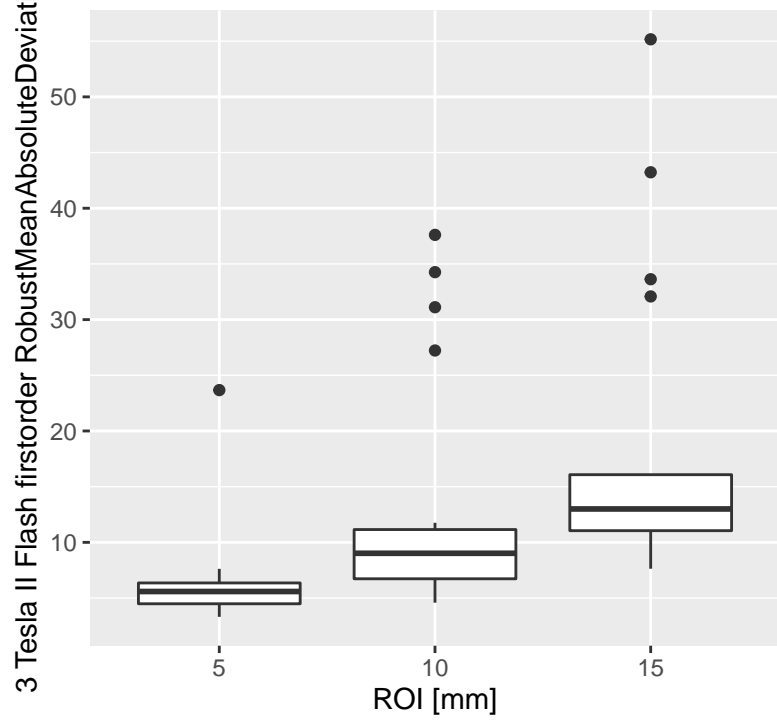

3 Tesla II Flash firstorder Minimum

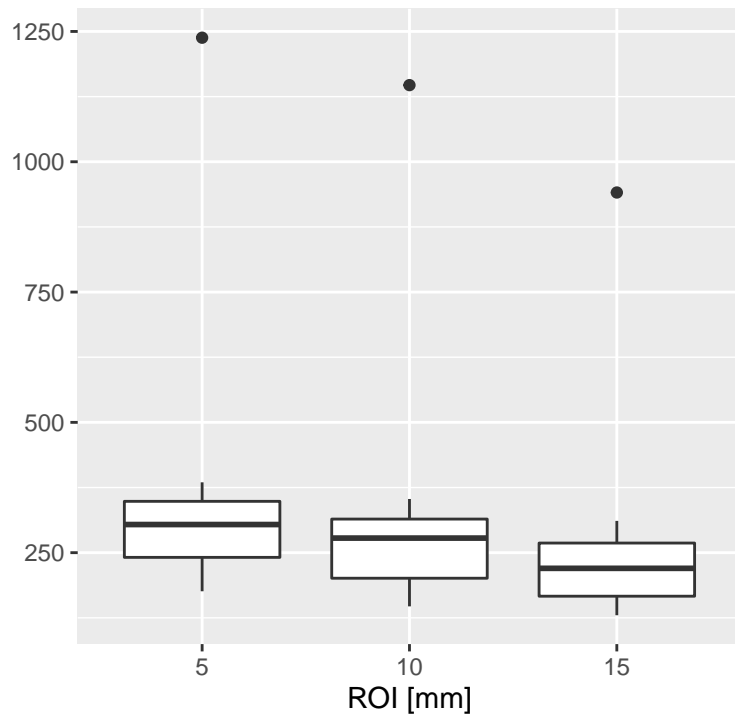

3 Tesla II Flash firstorder RootMeanSquared

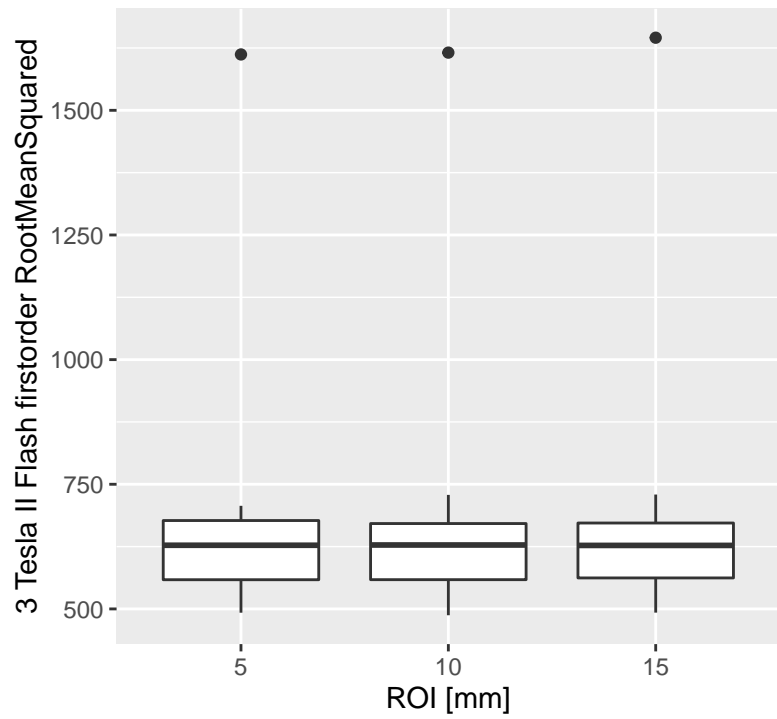

3 Tesla II Flash firstorder Range

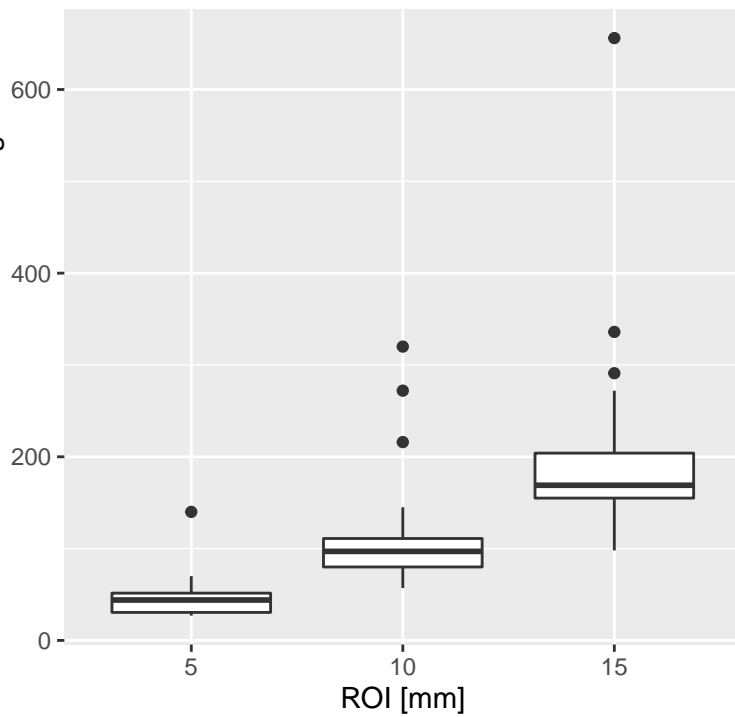

3 Tesla II Flash firstorder Skewness

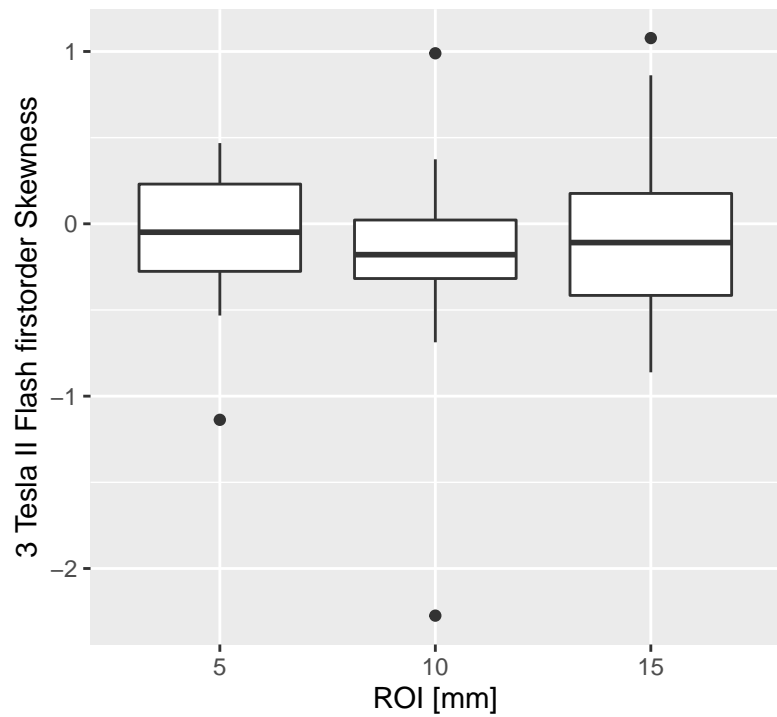



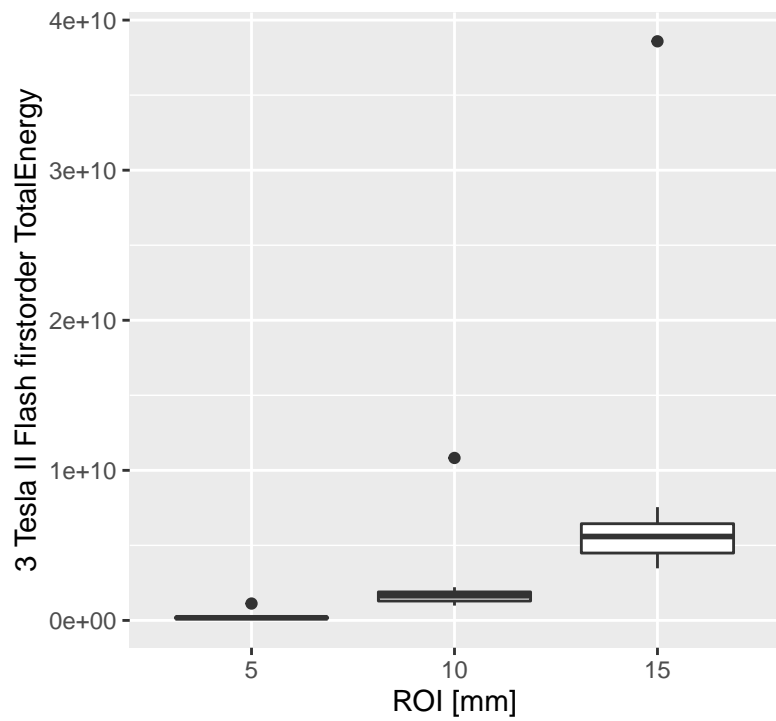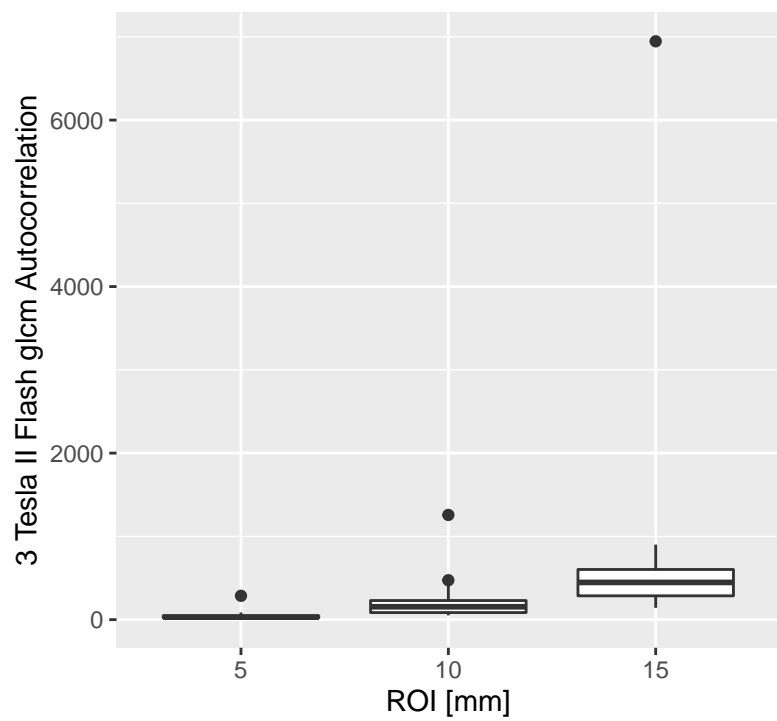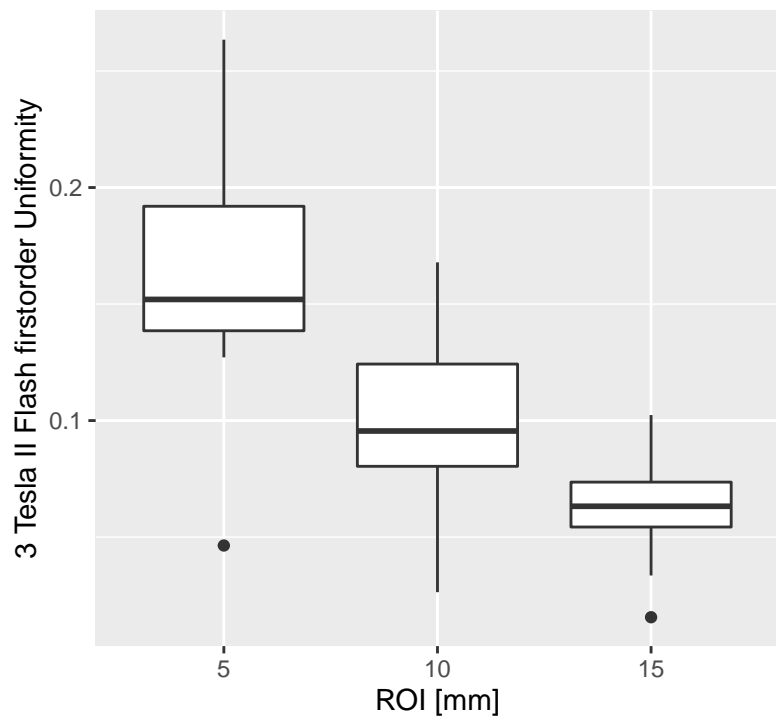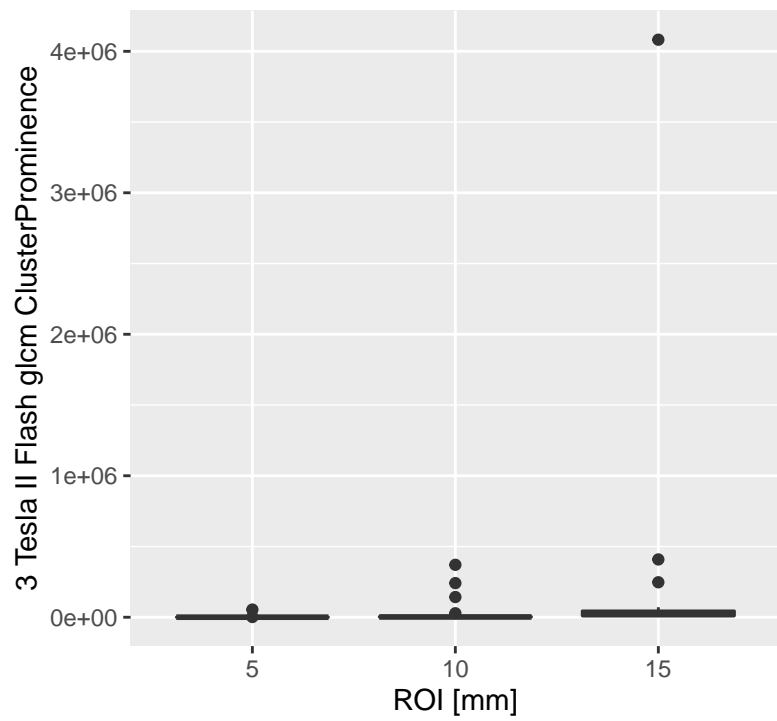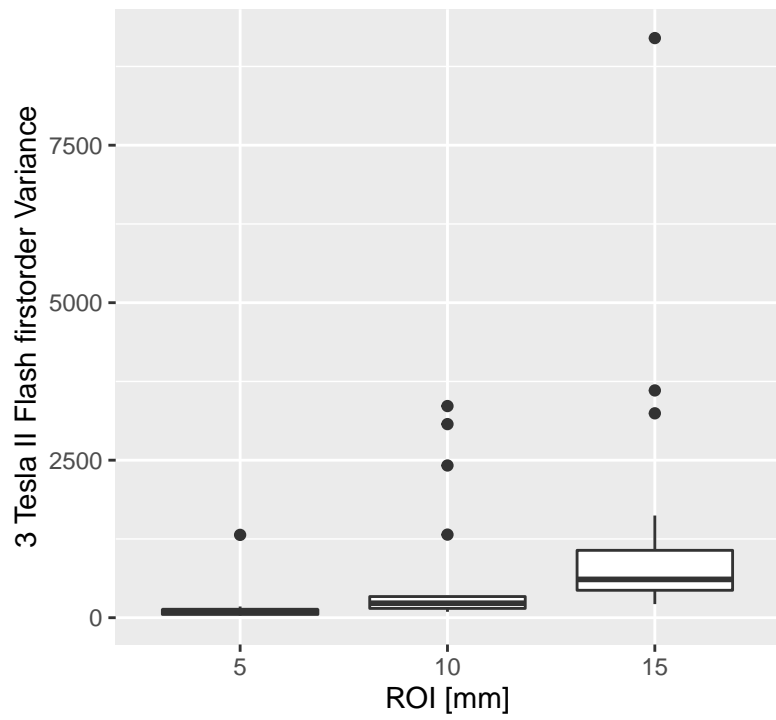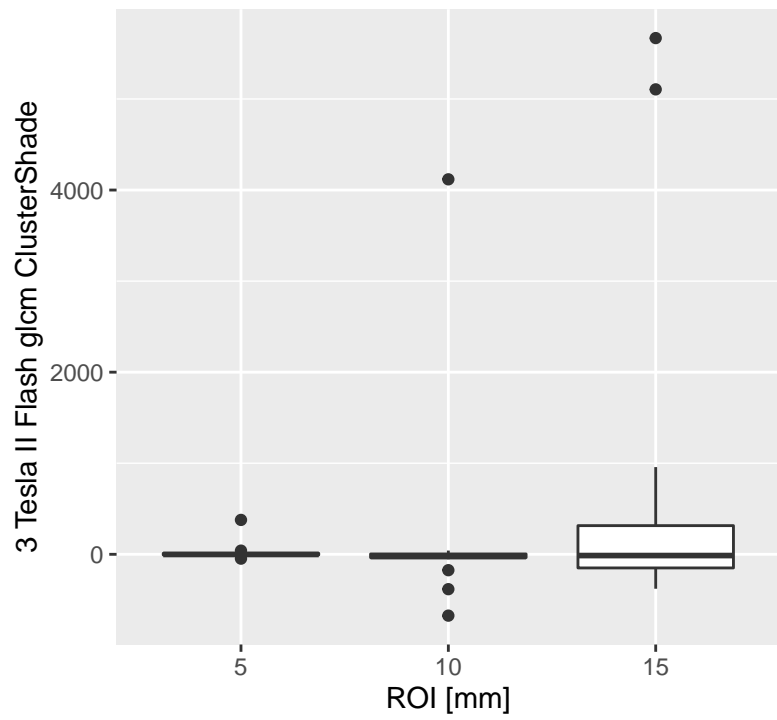

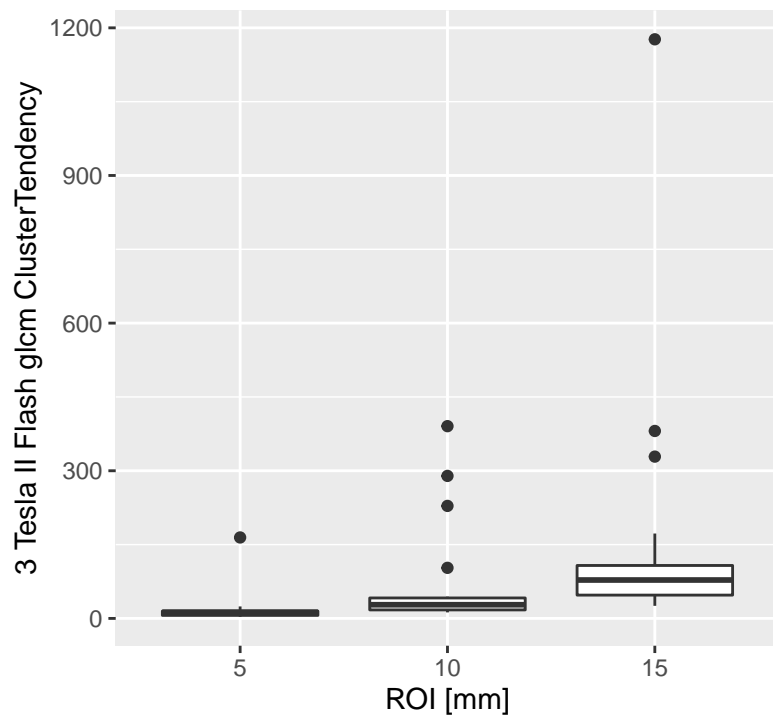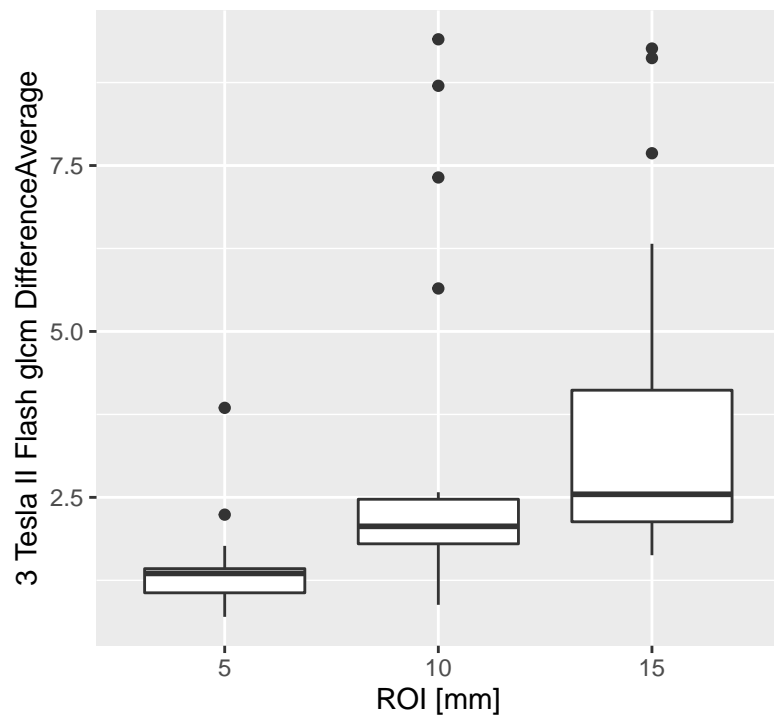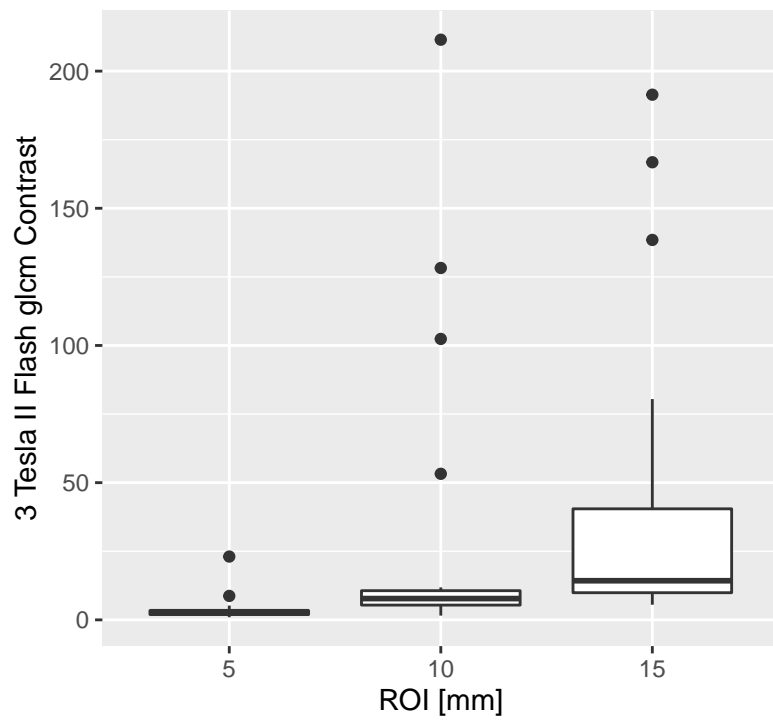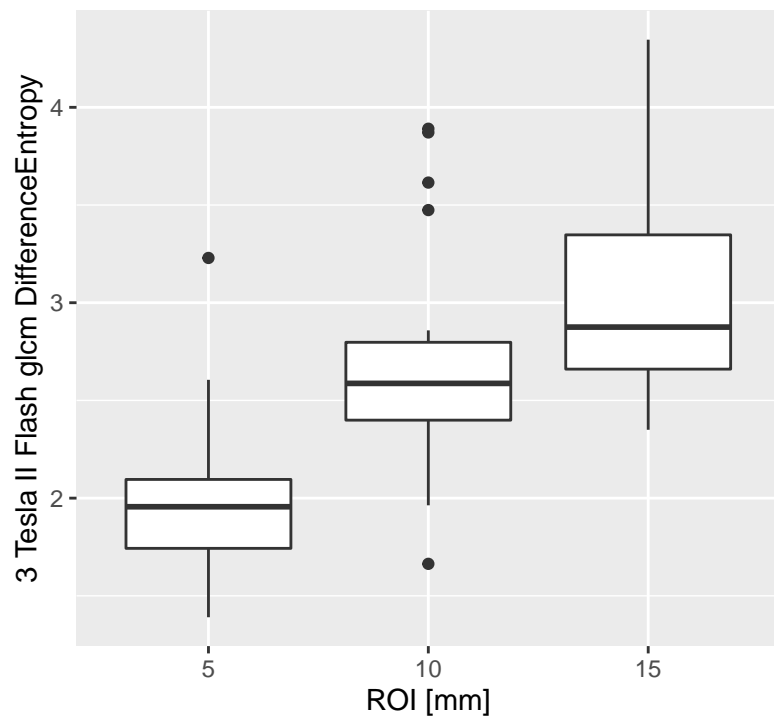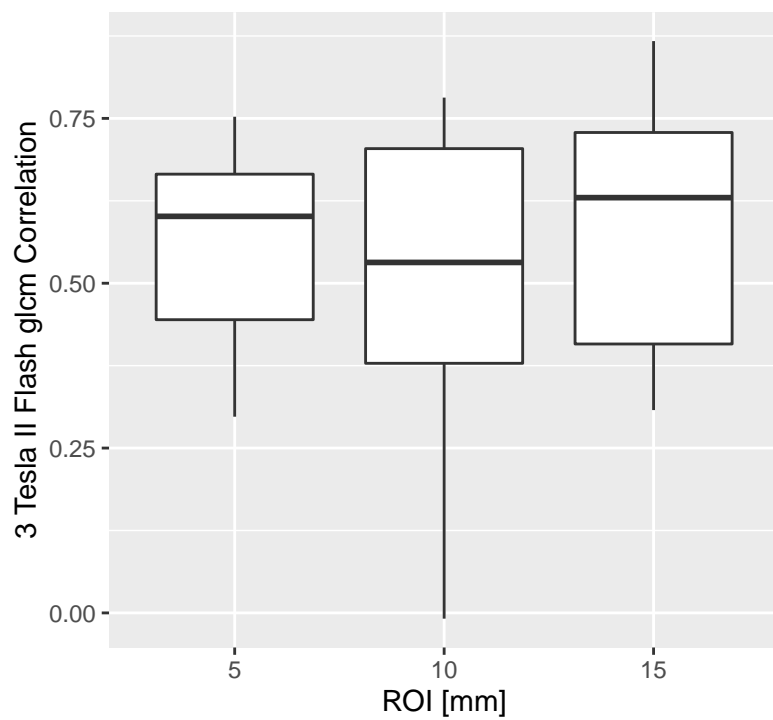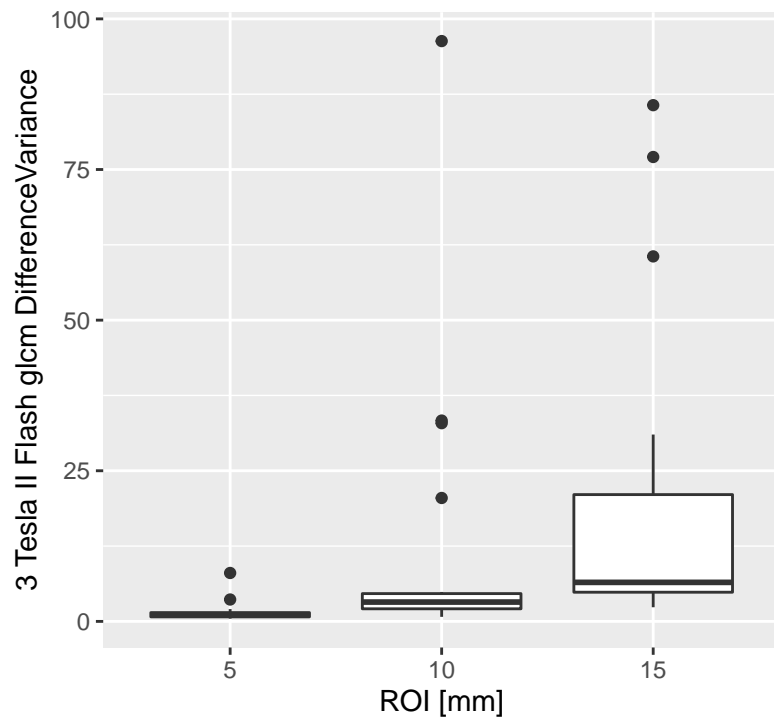

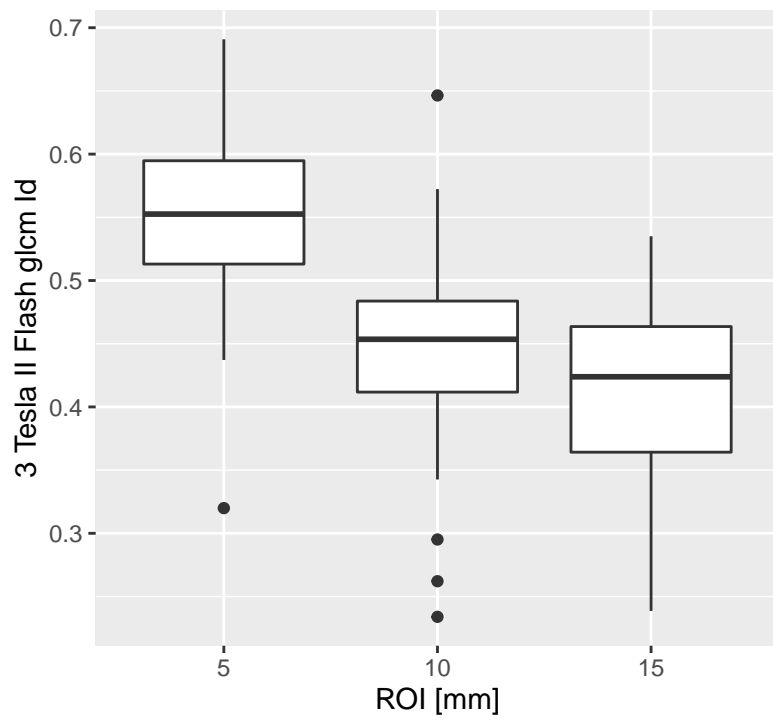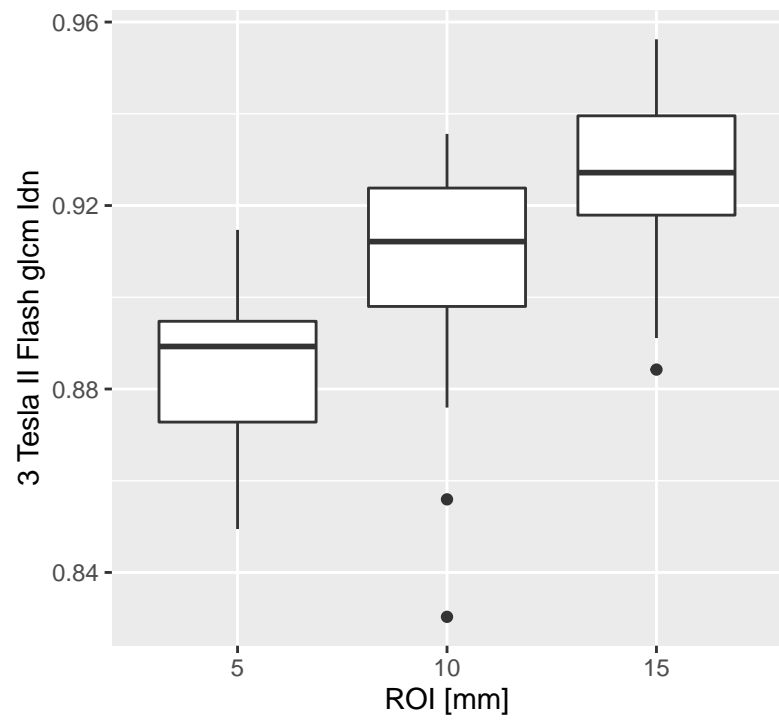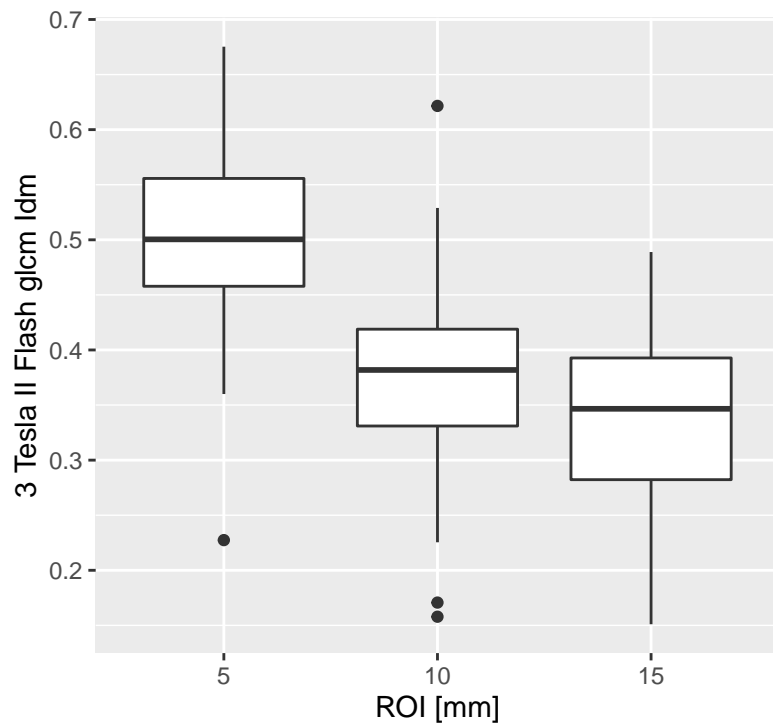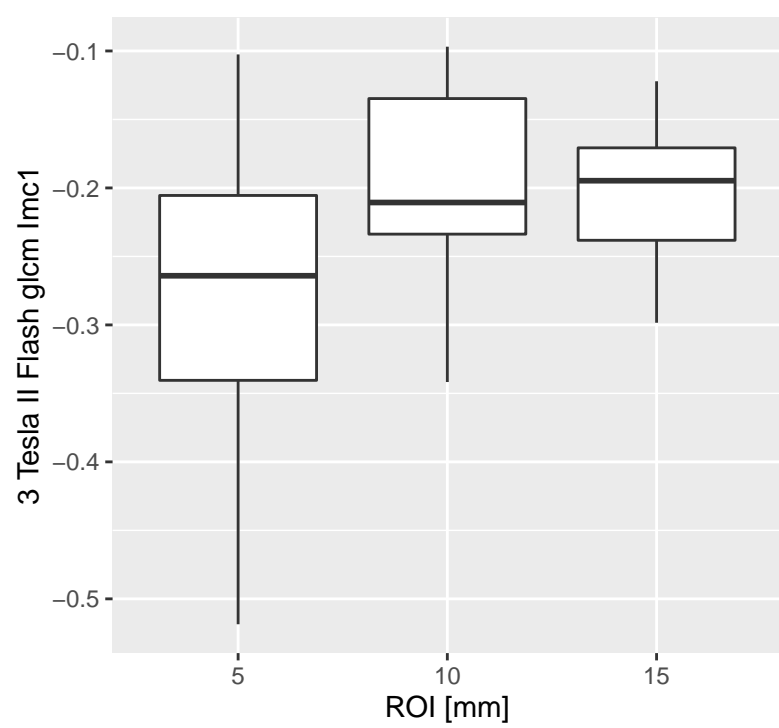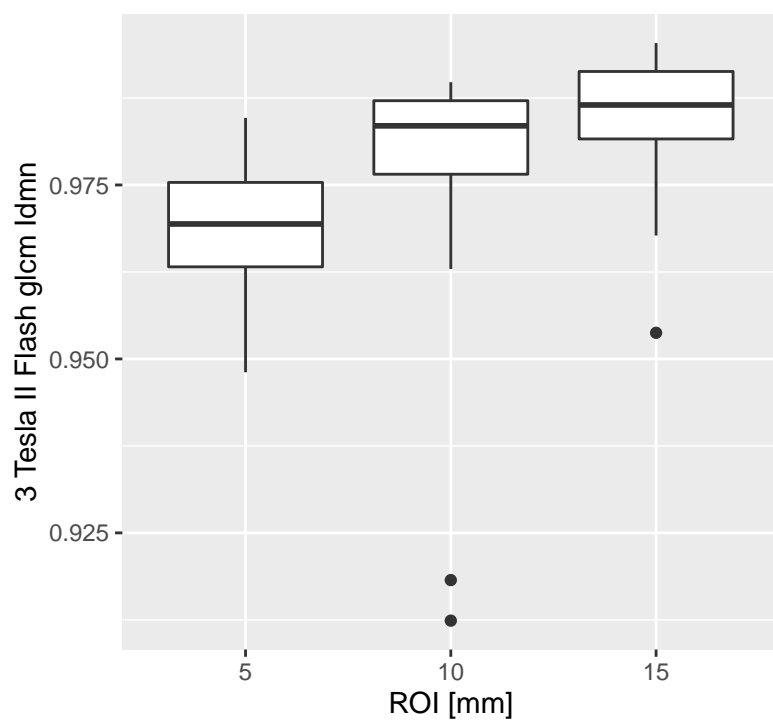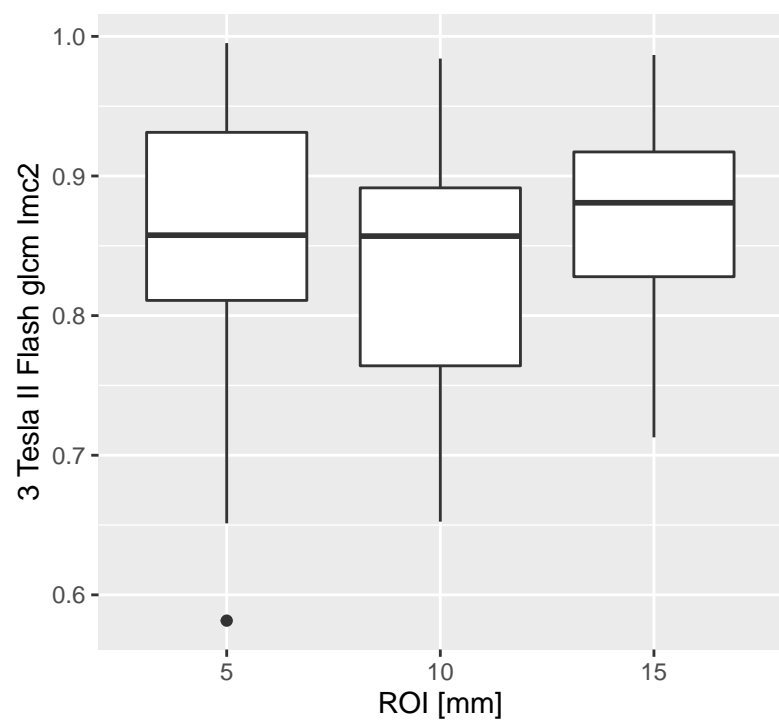

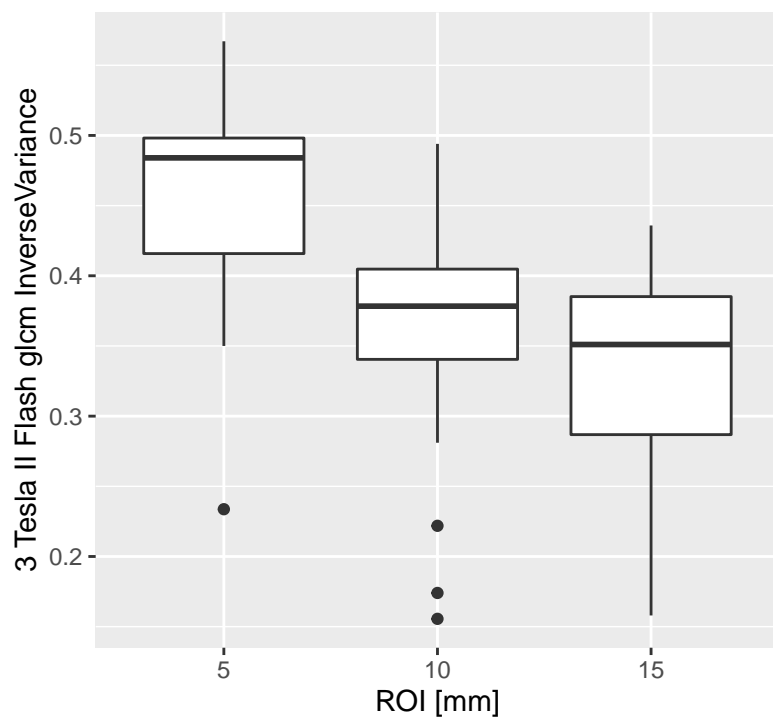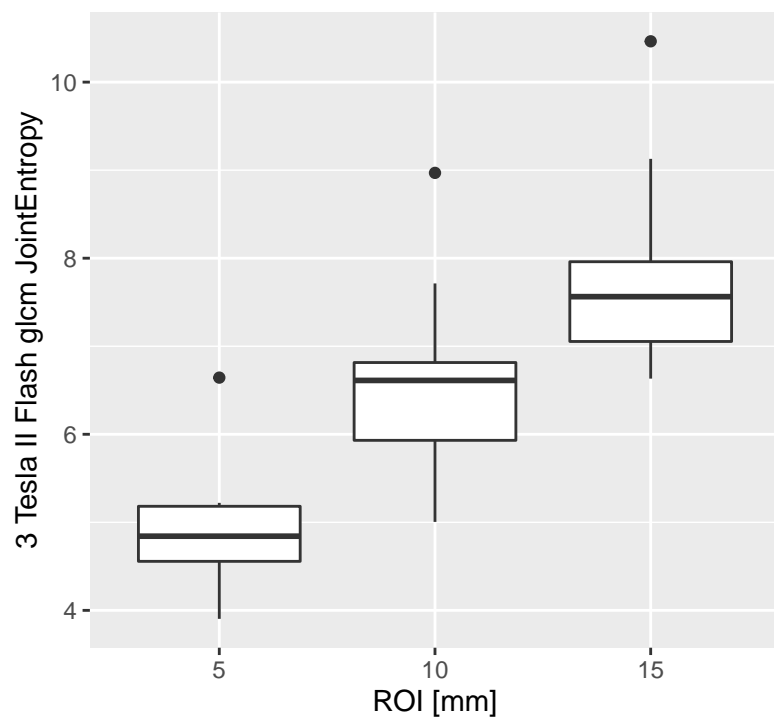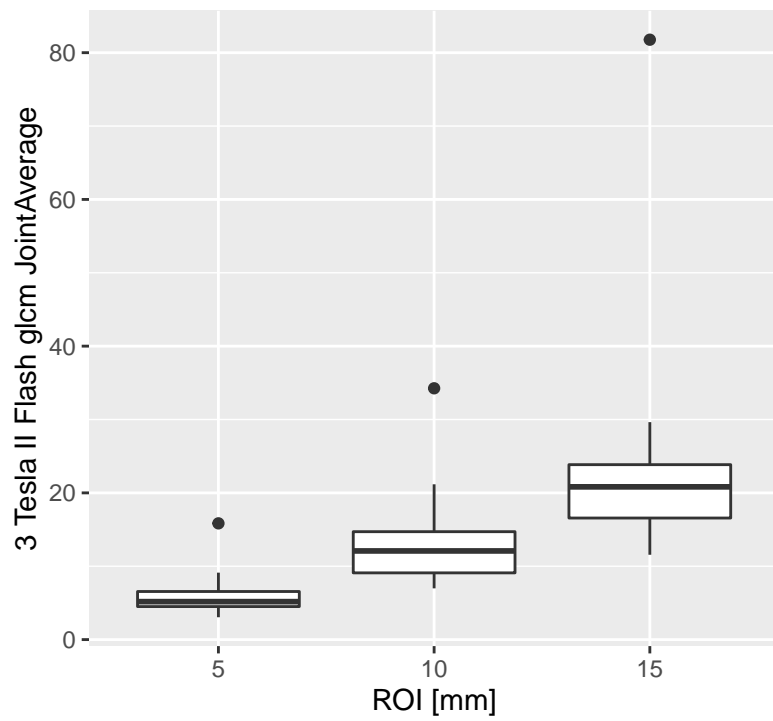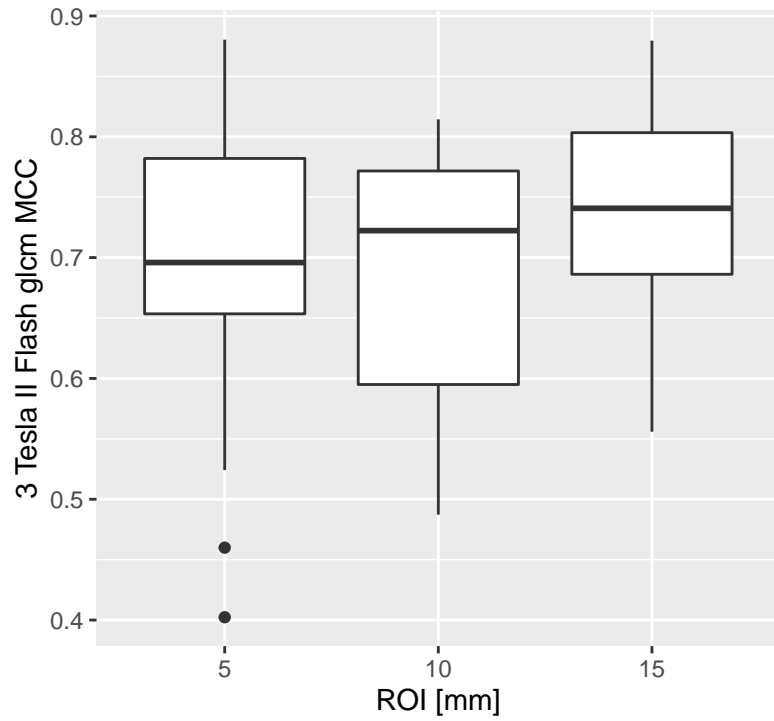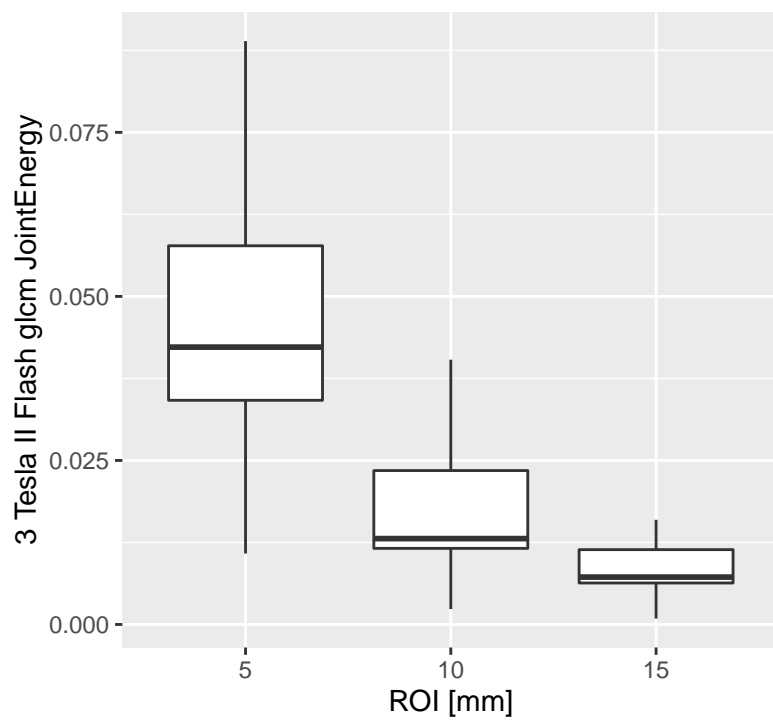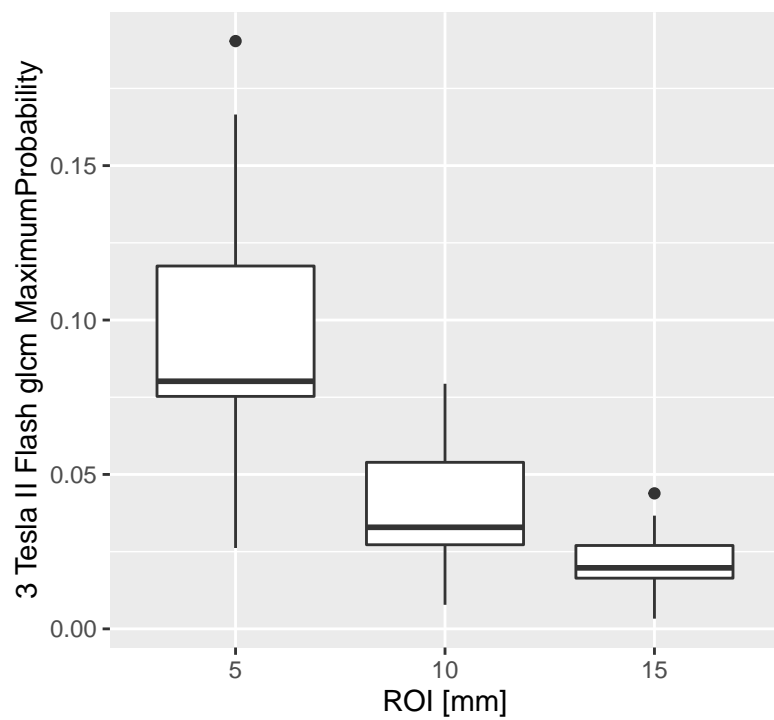

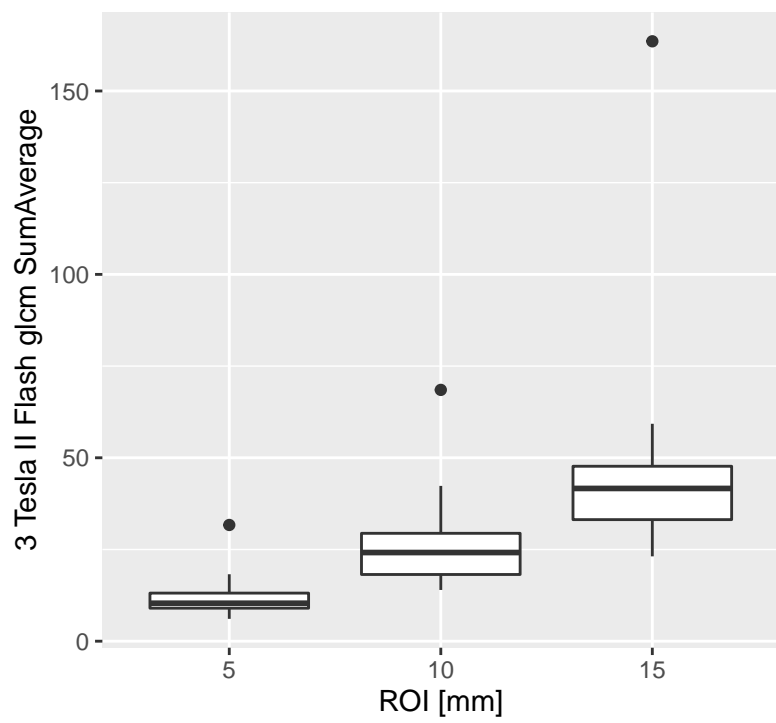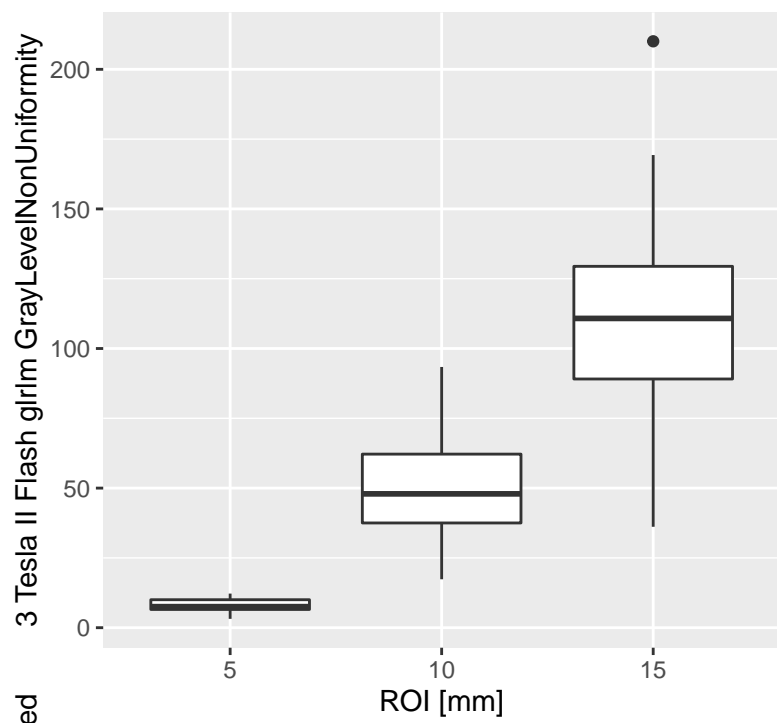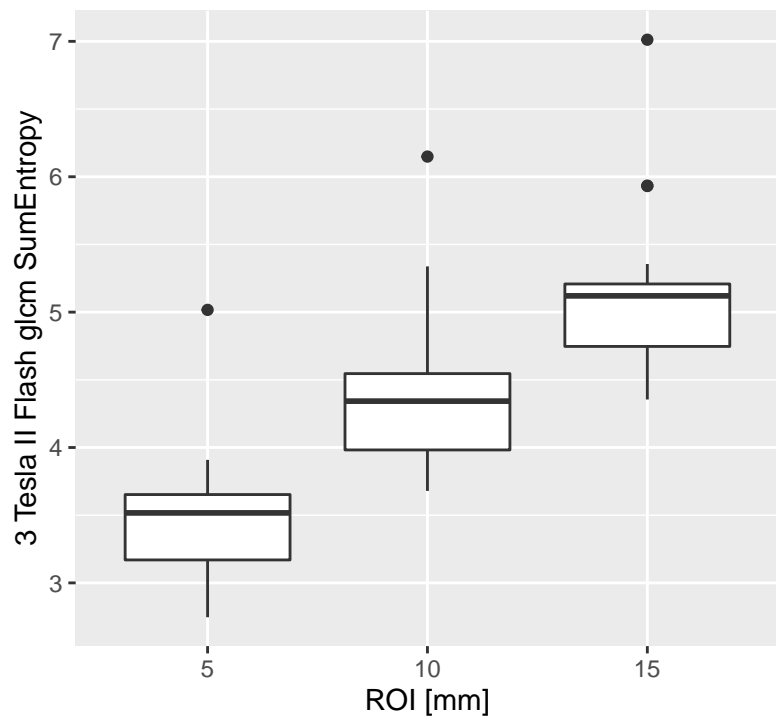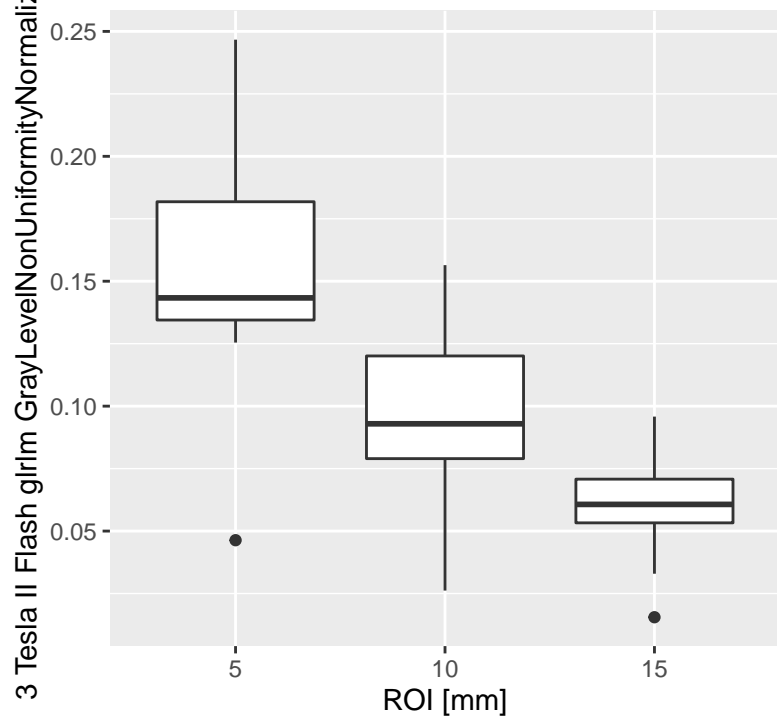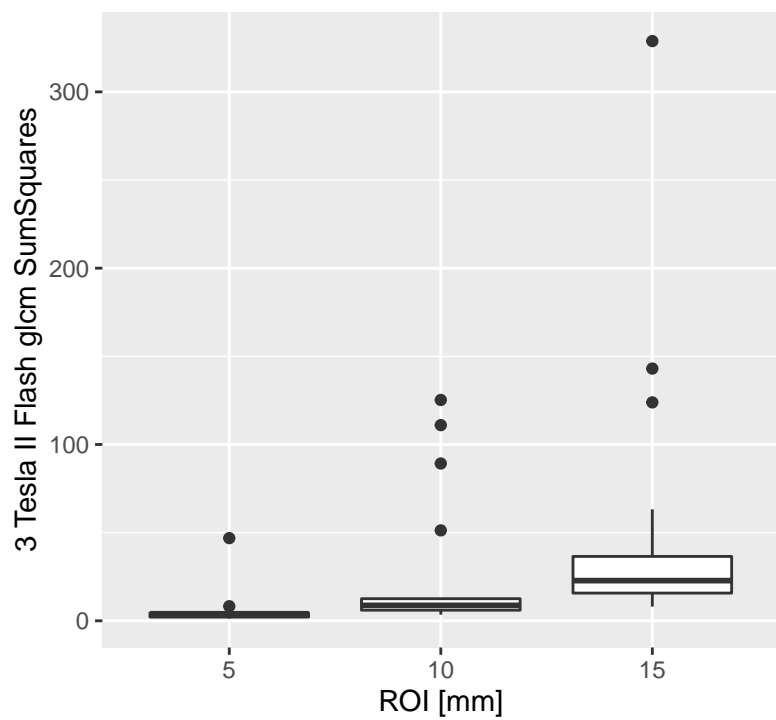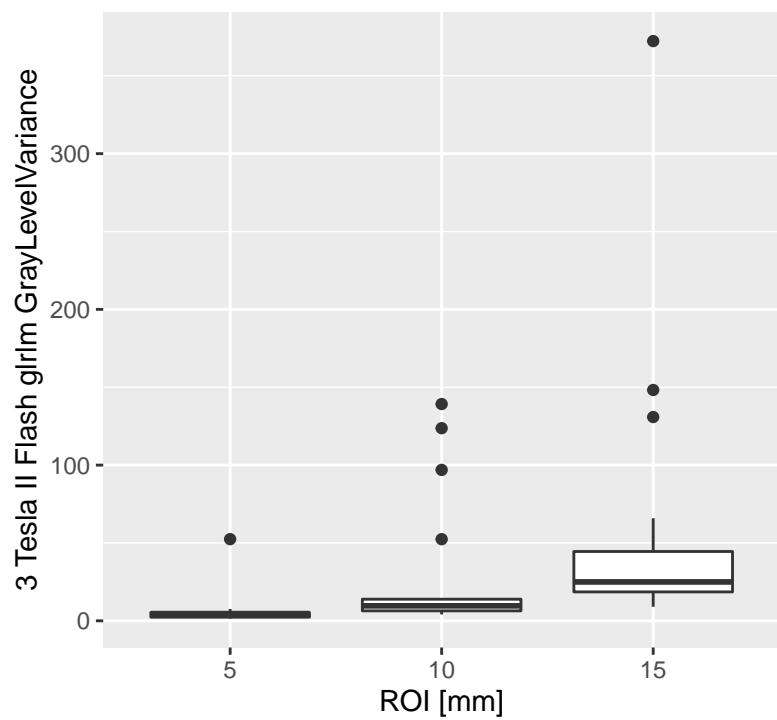

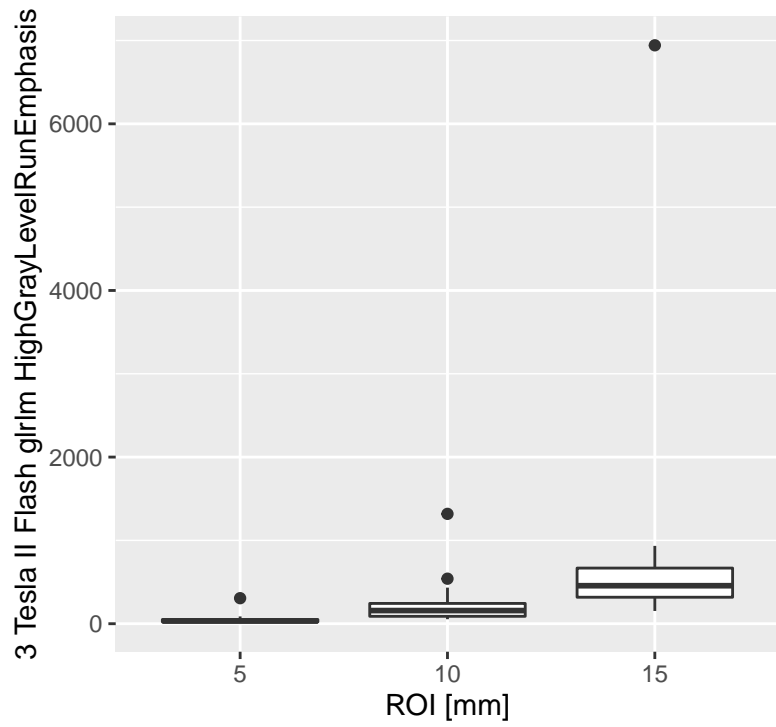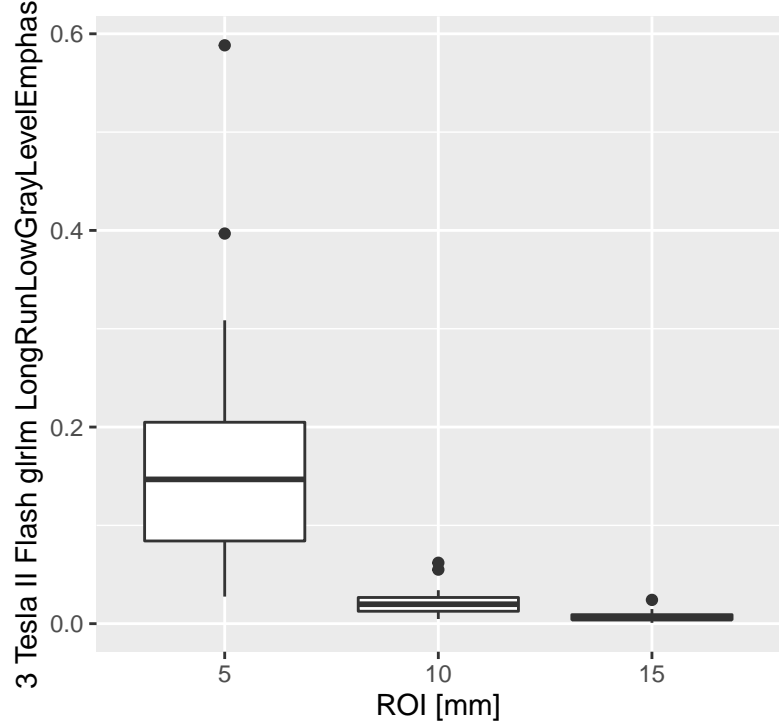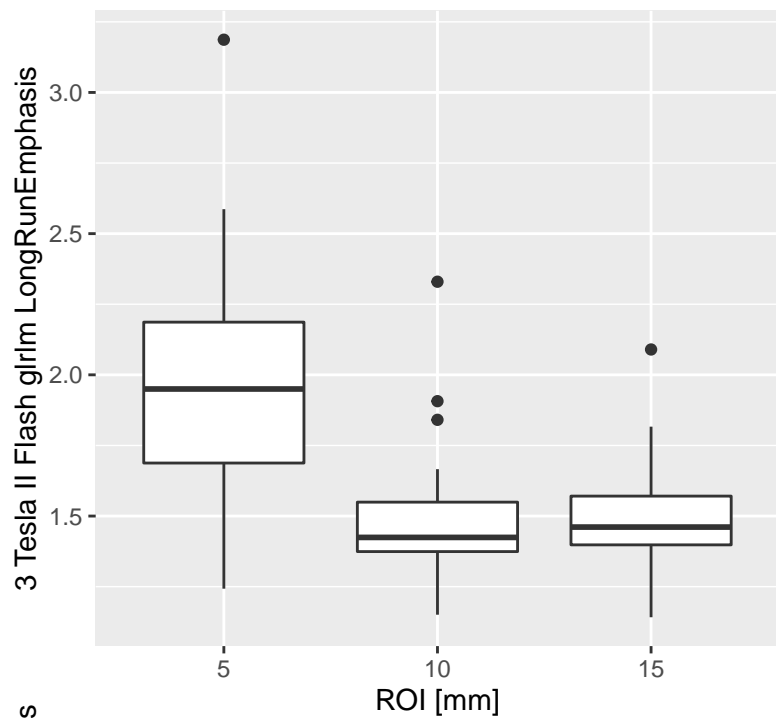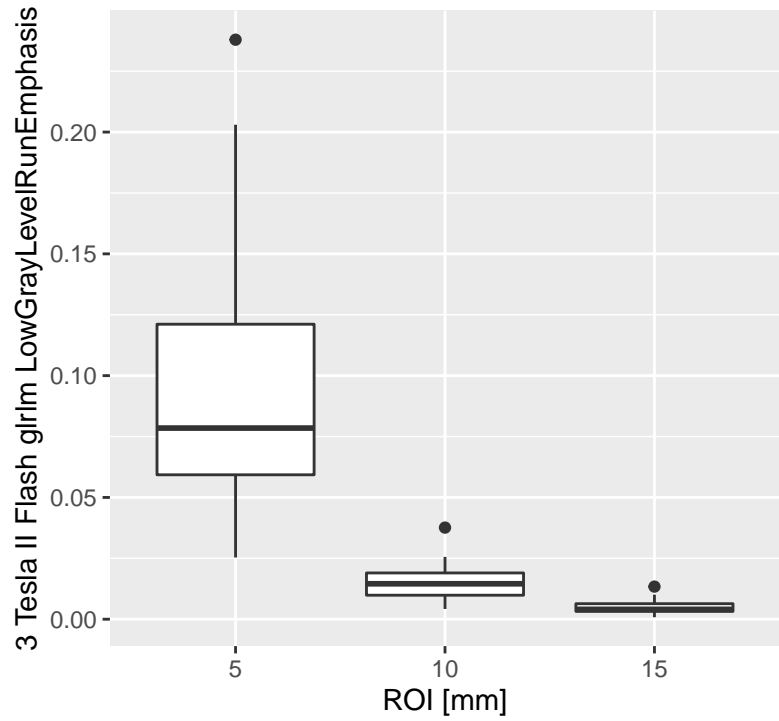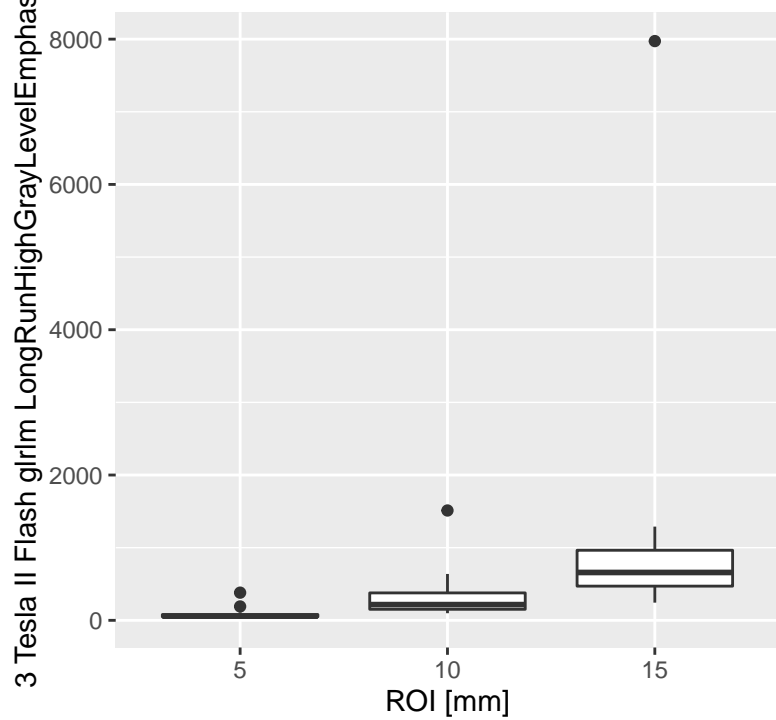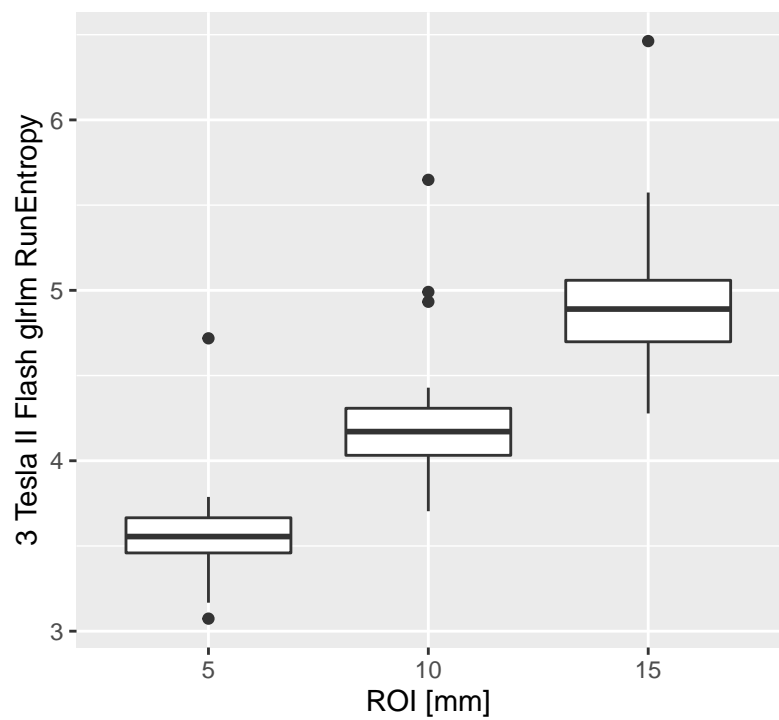

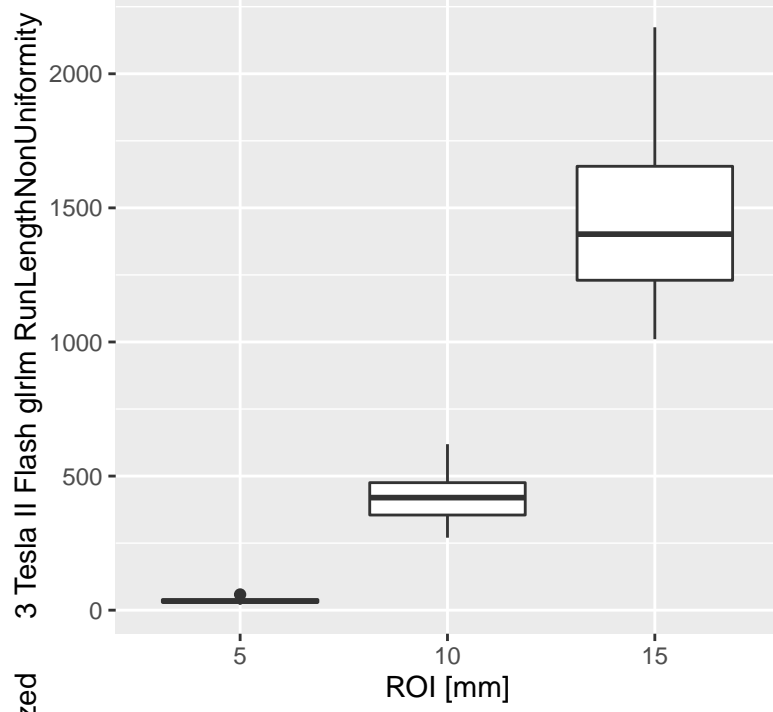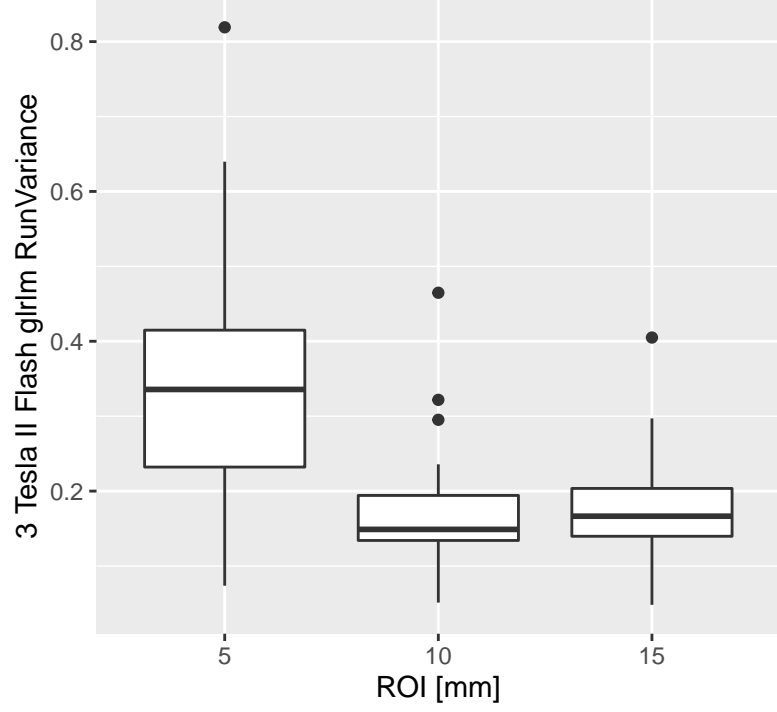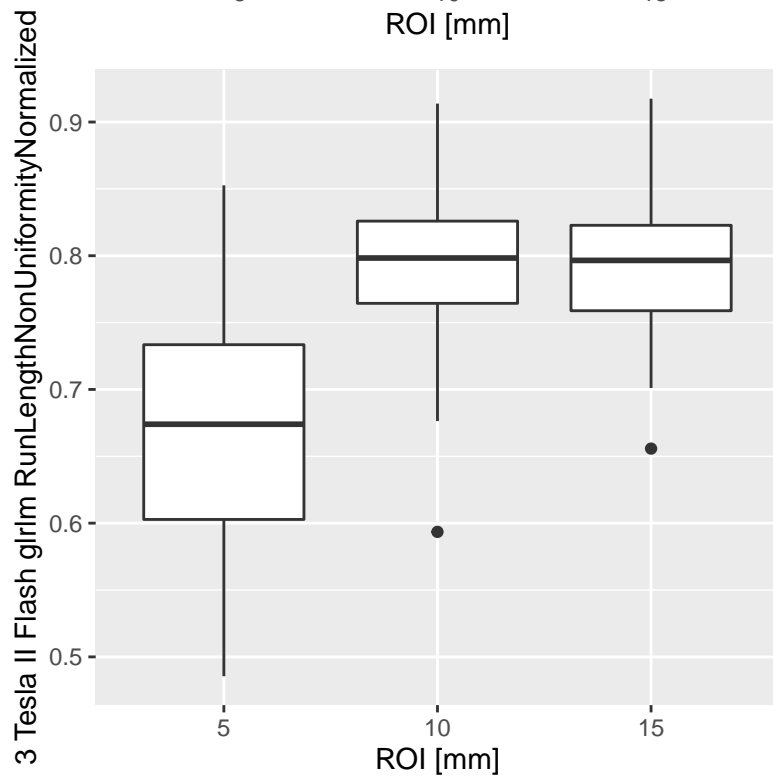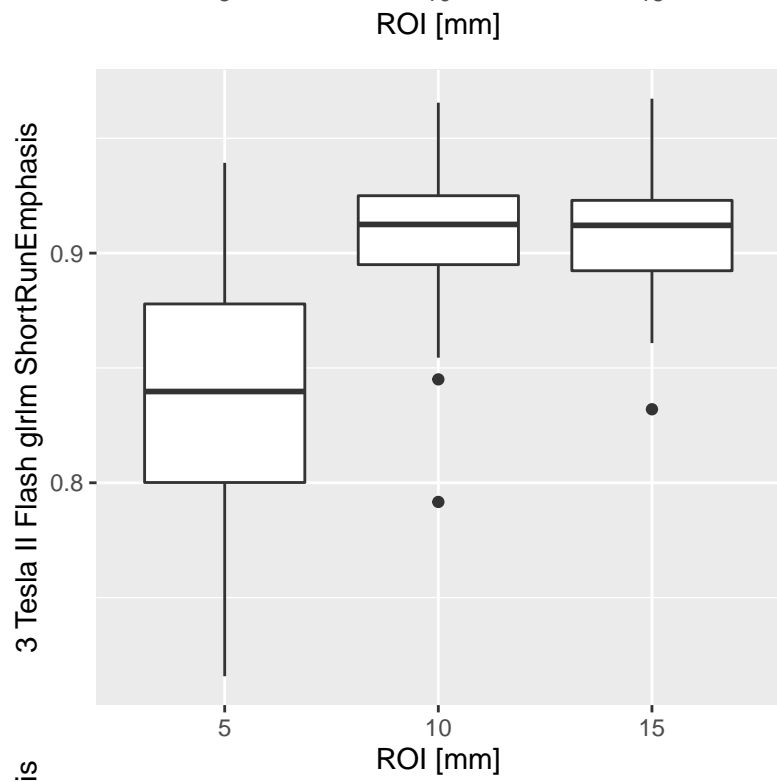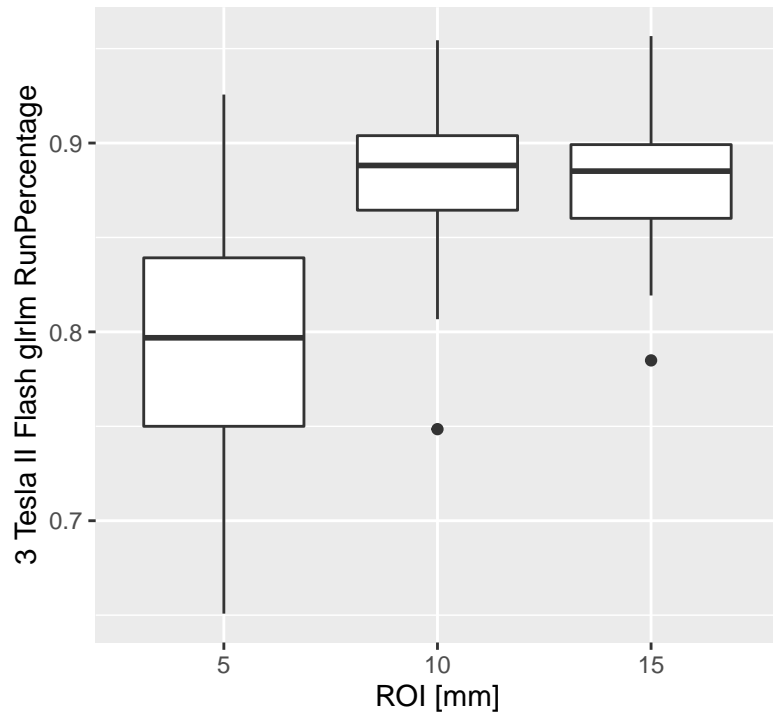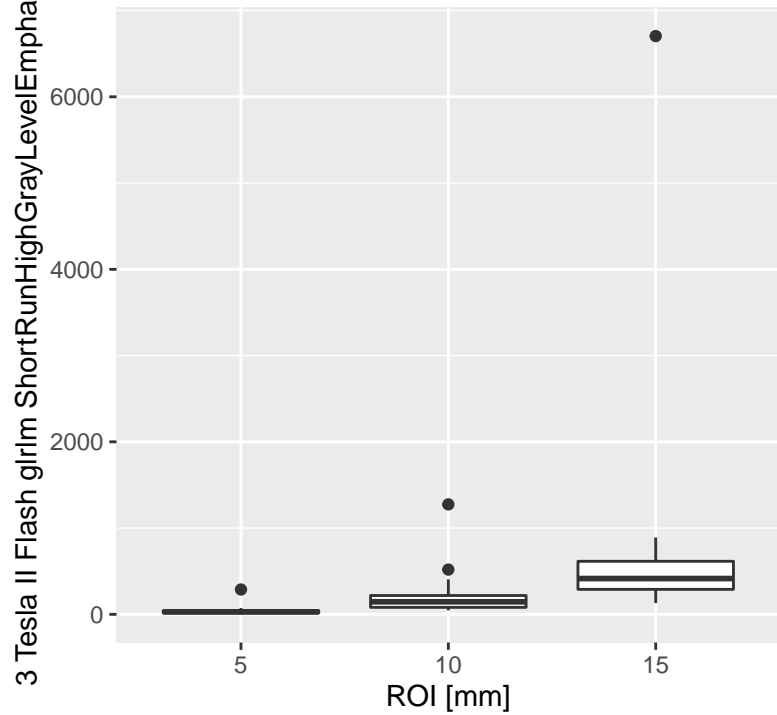

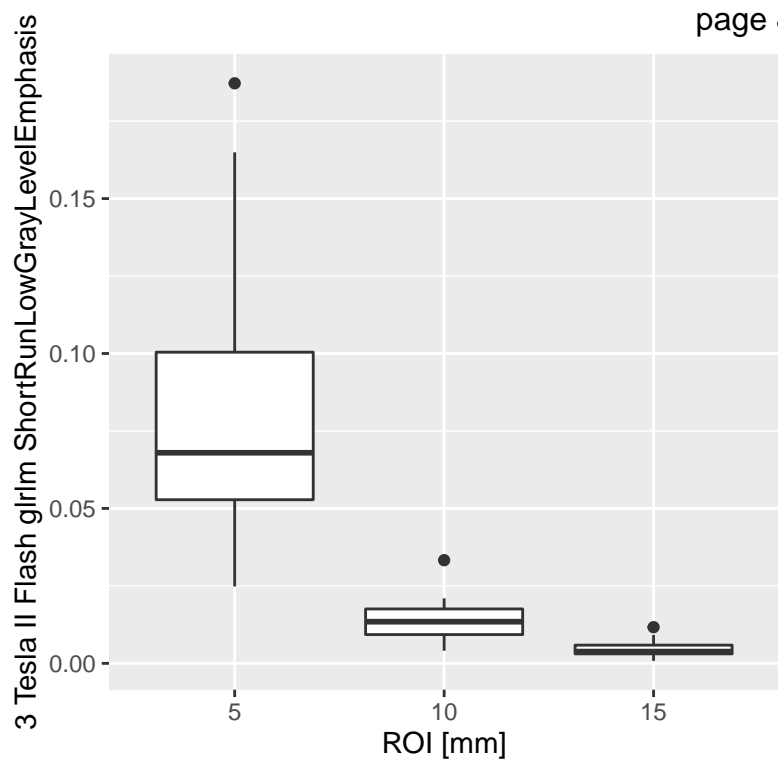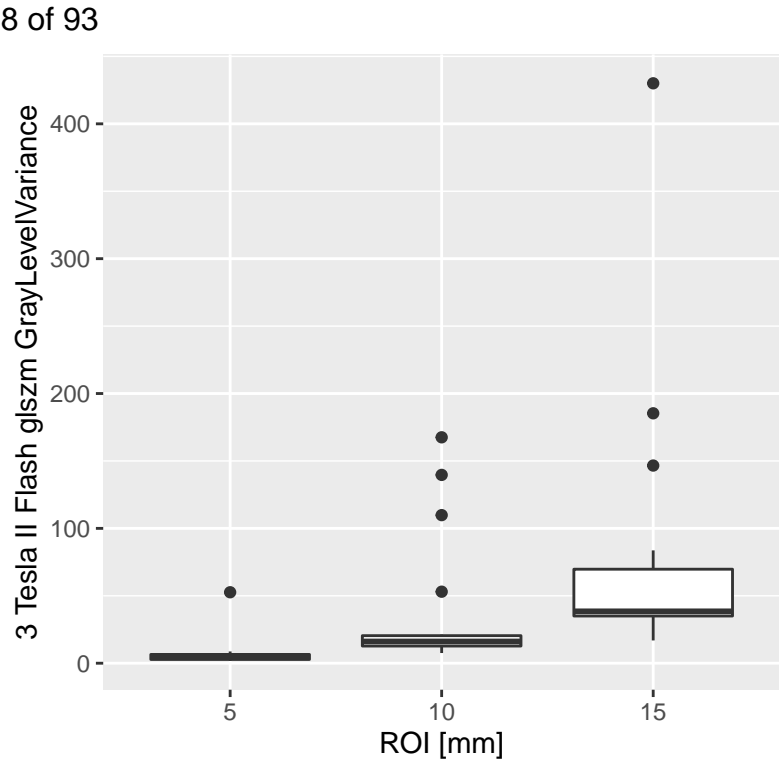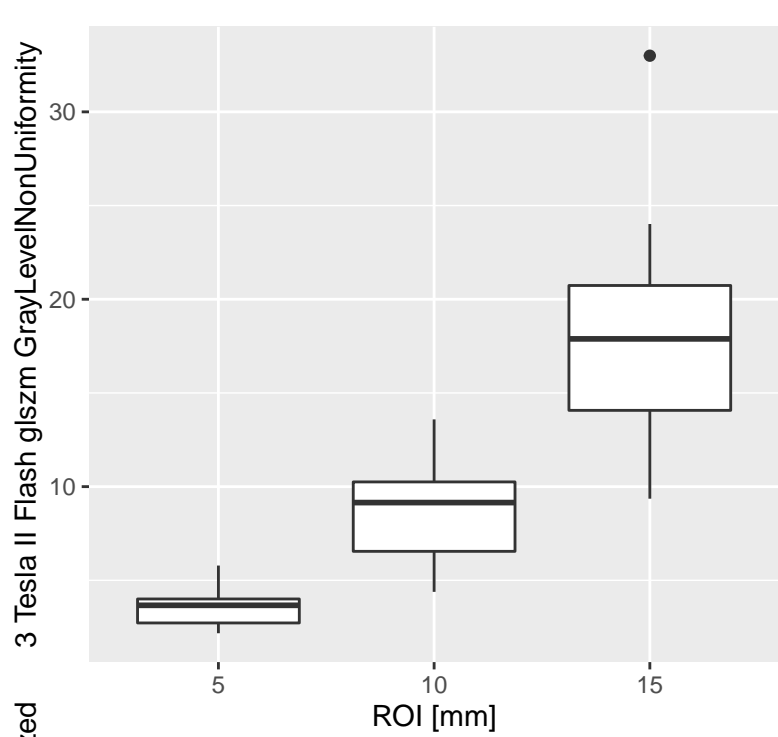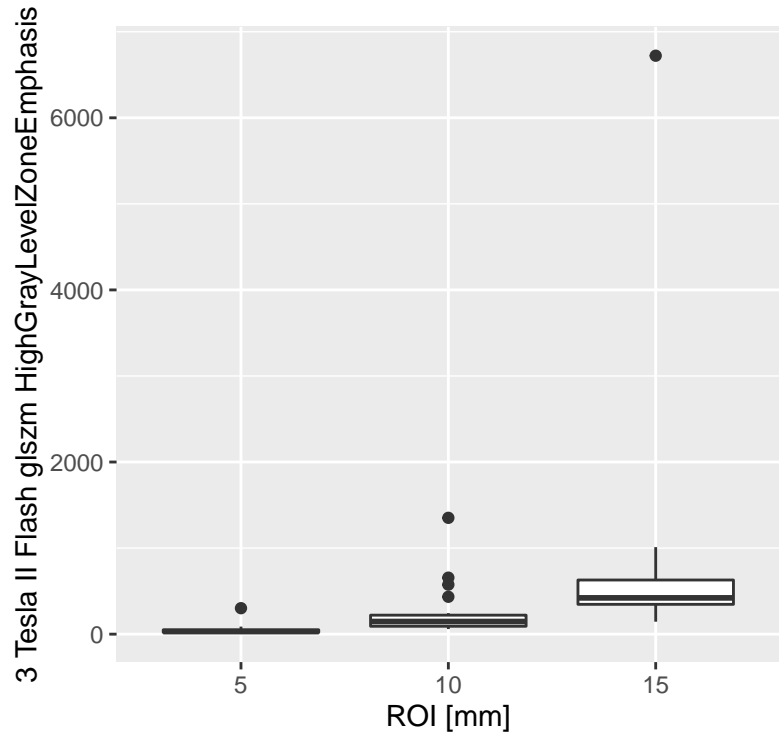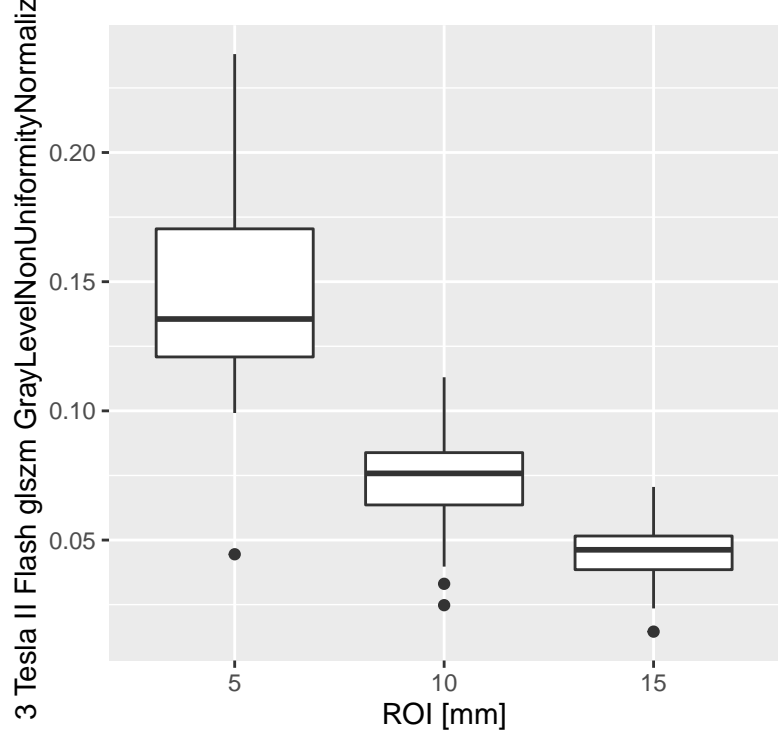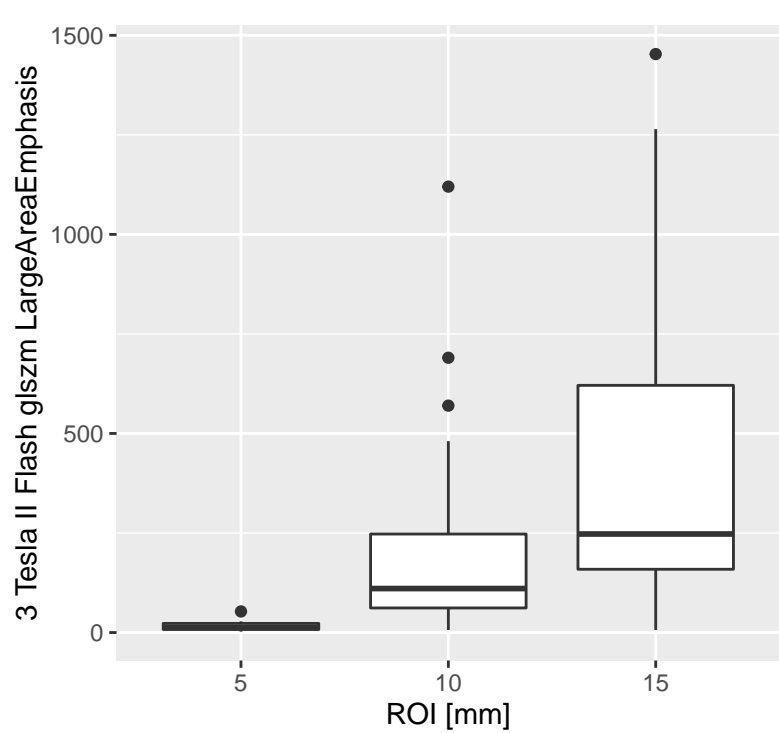



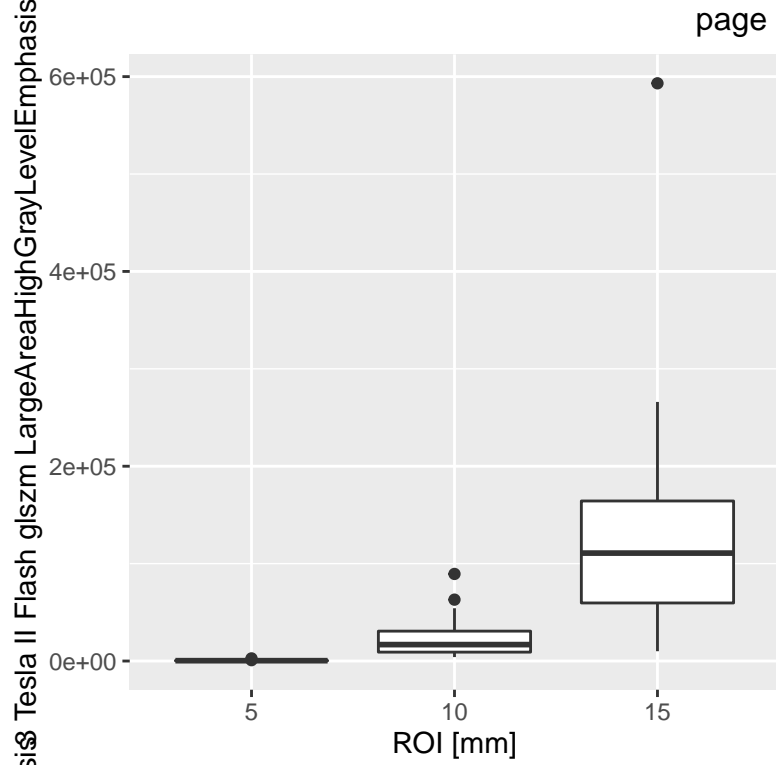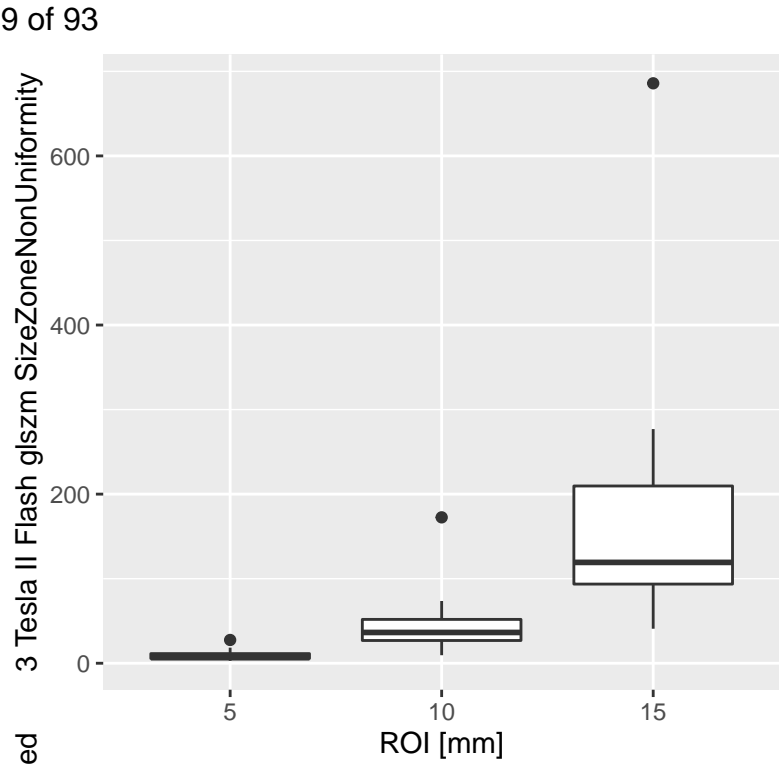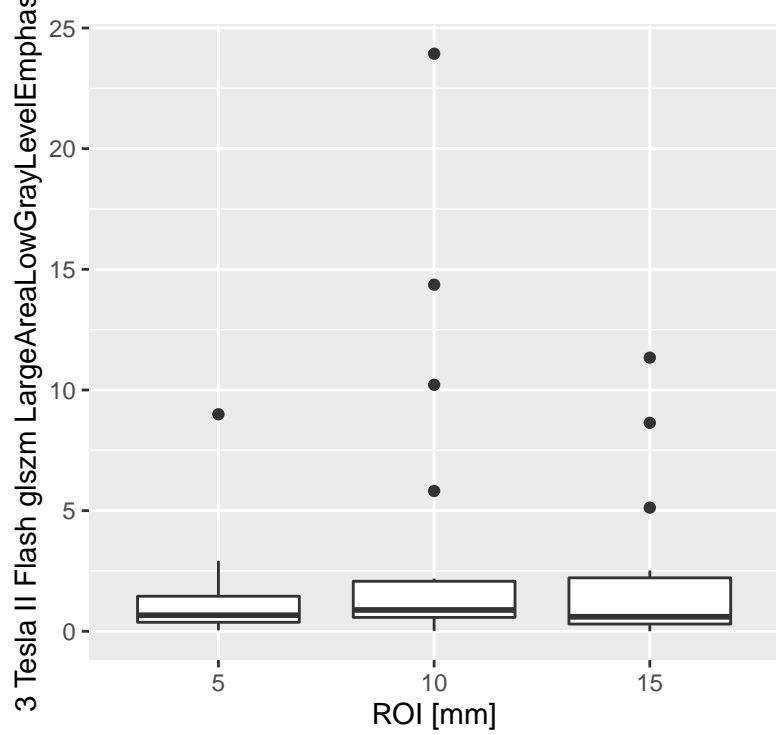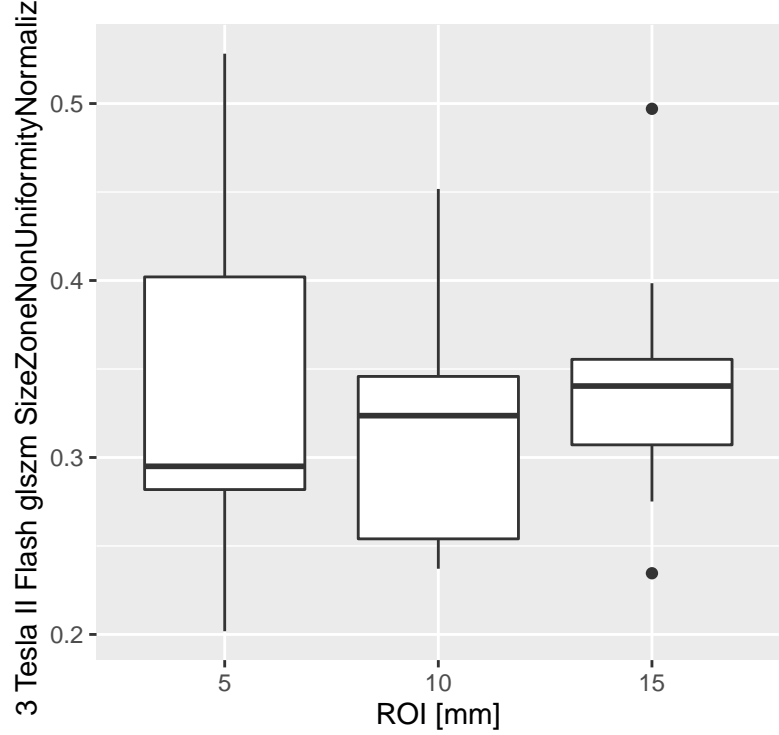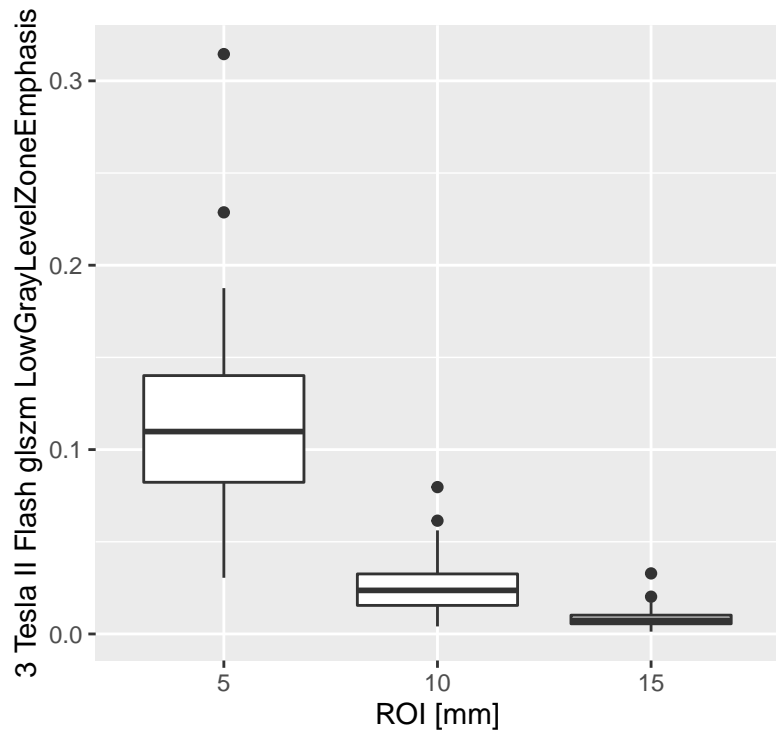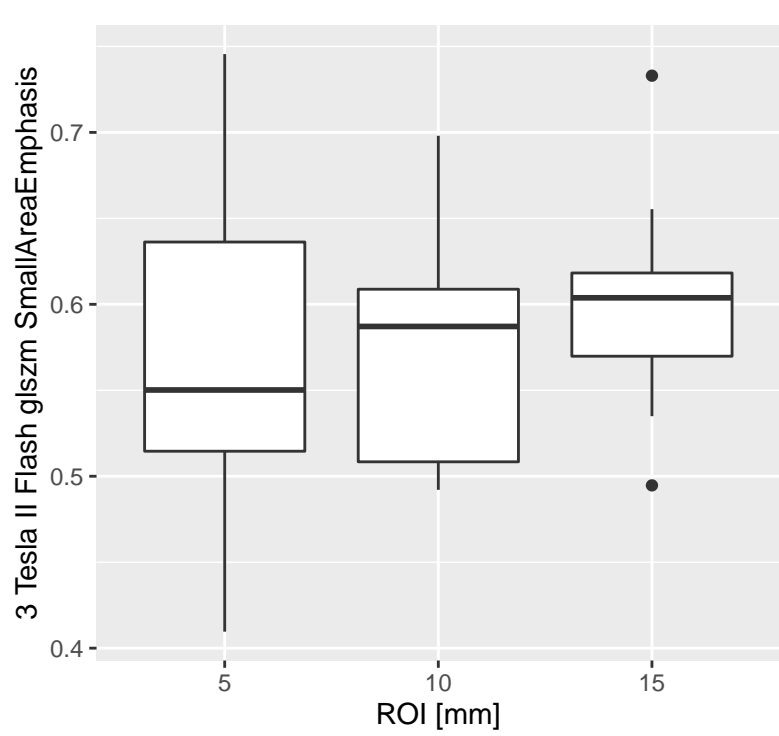

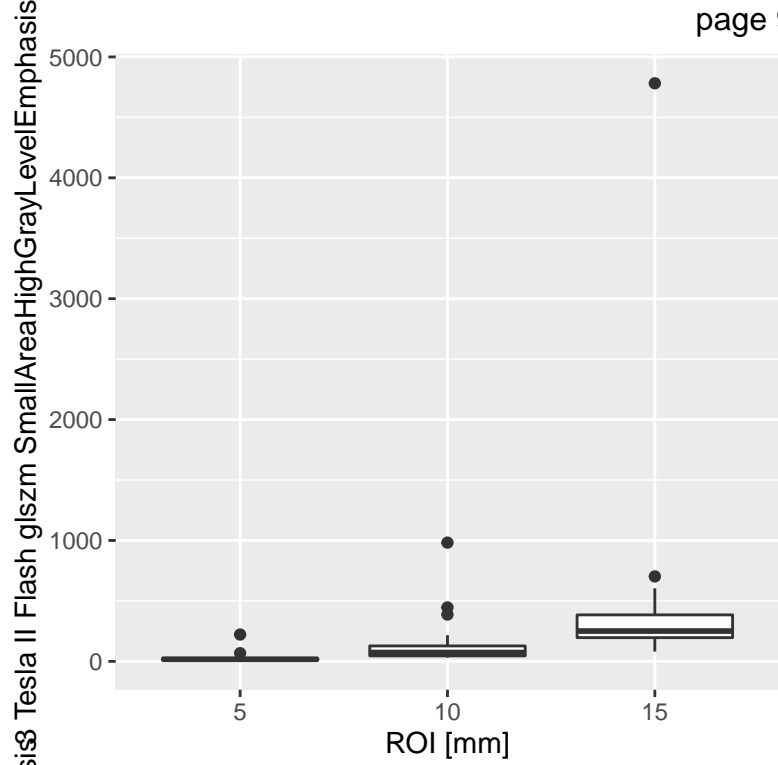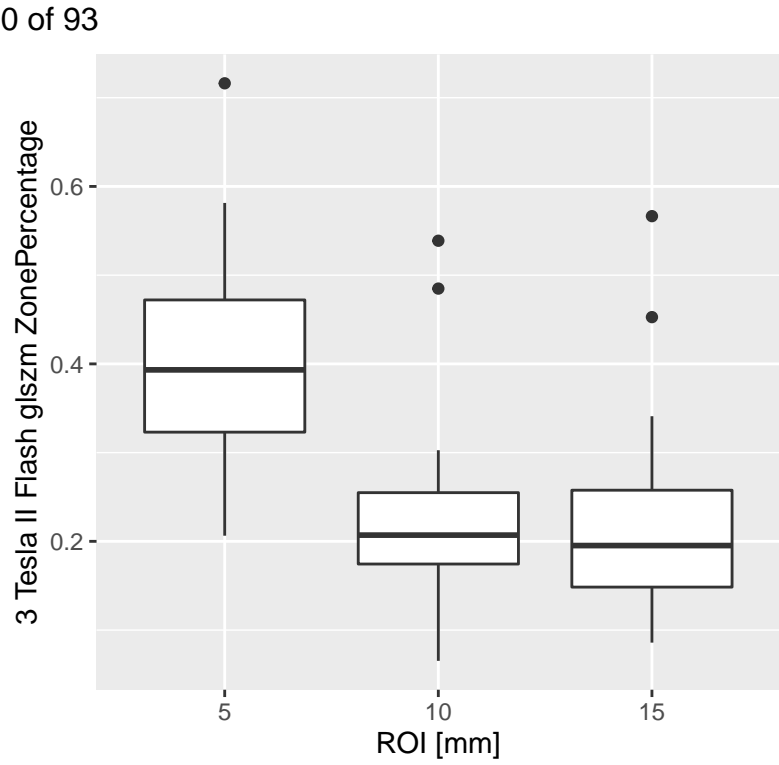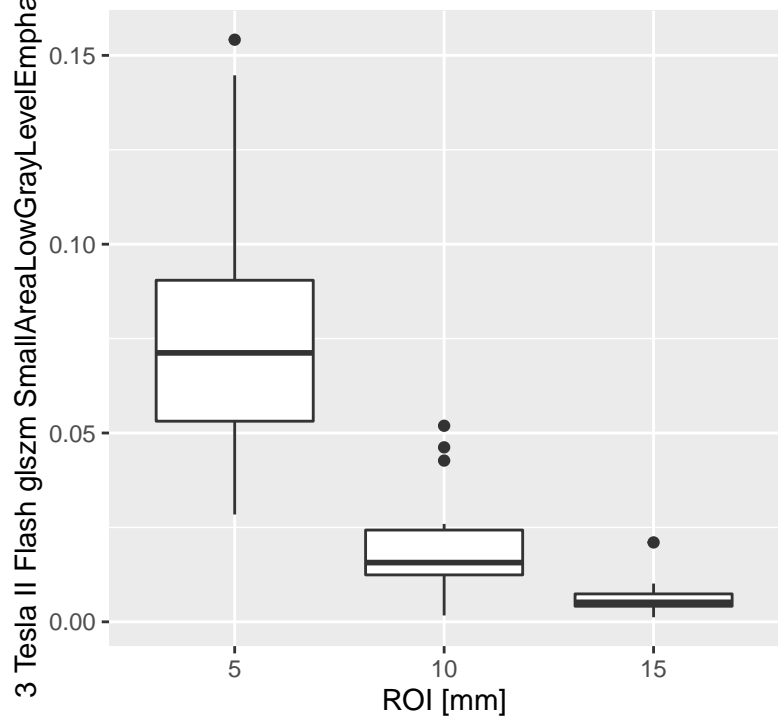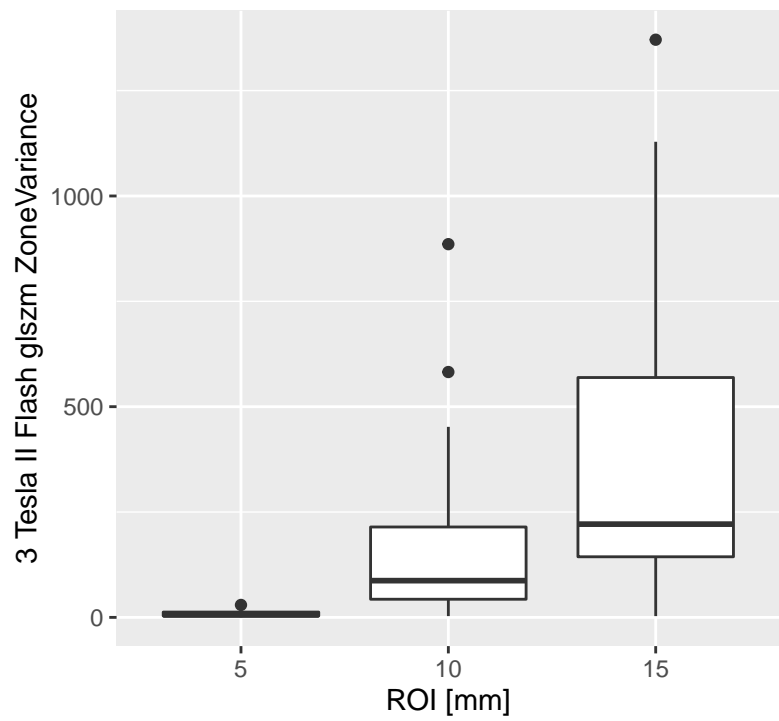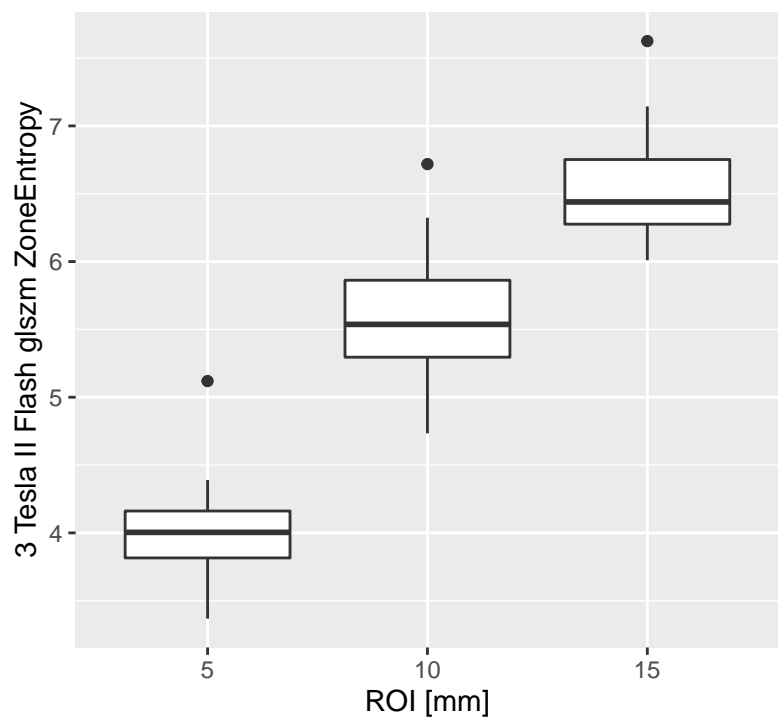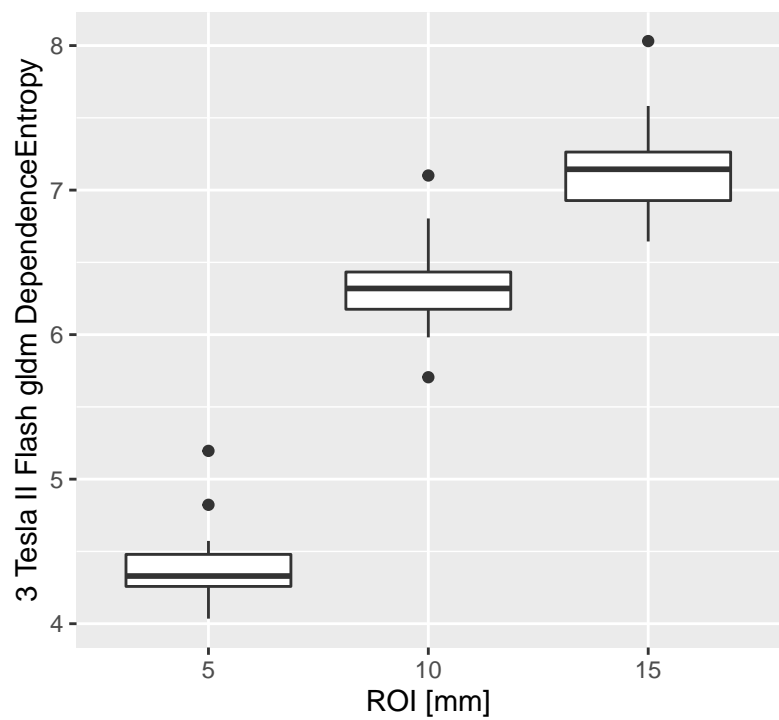

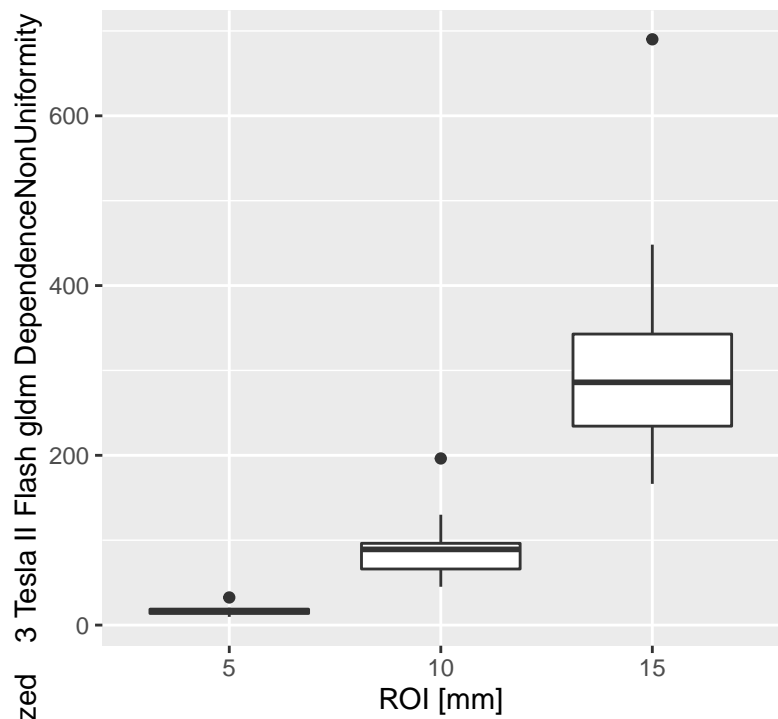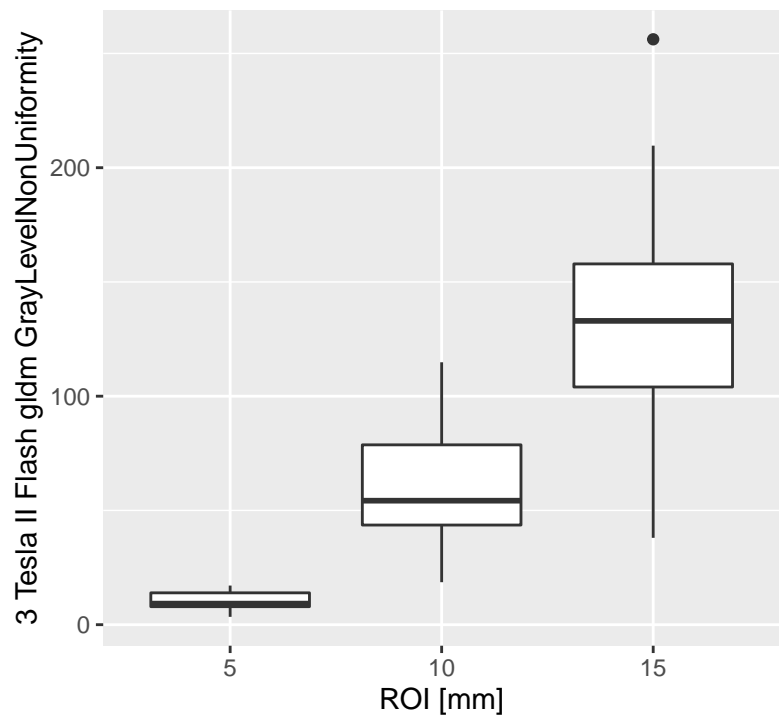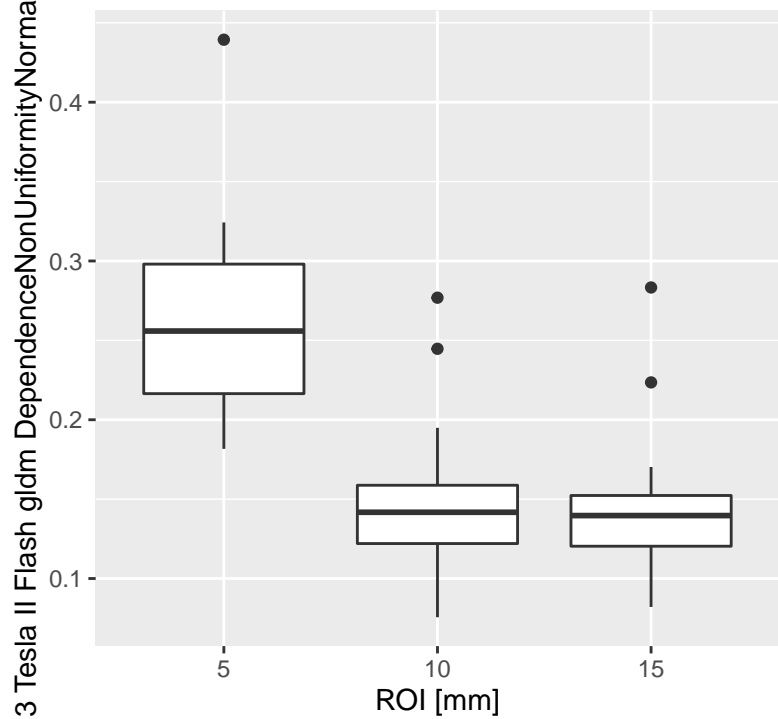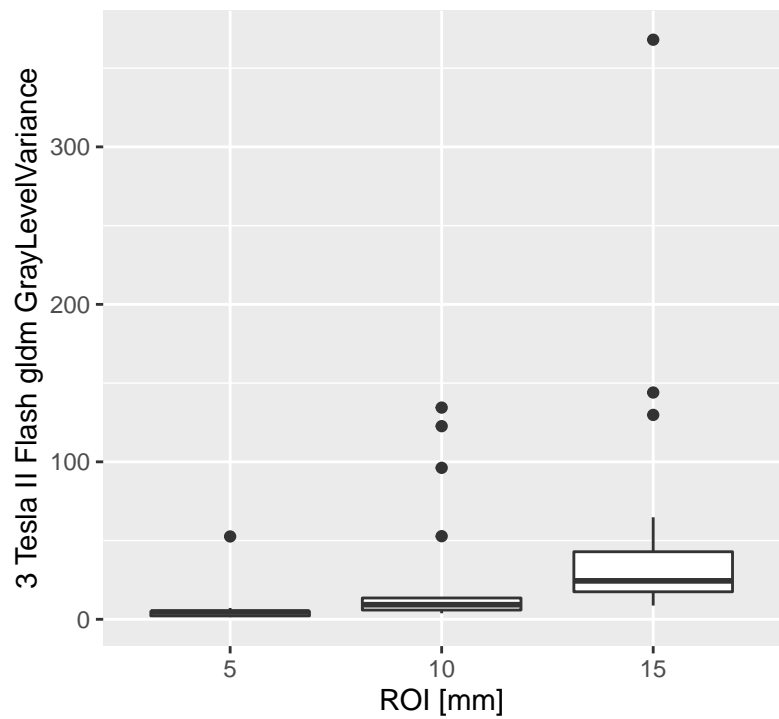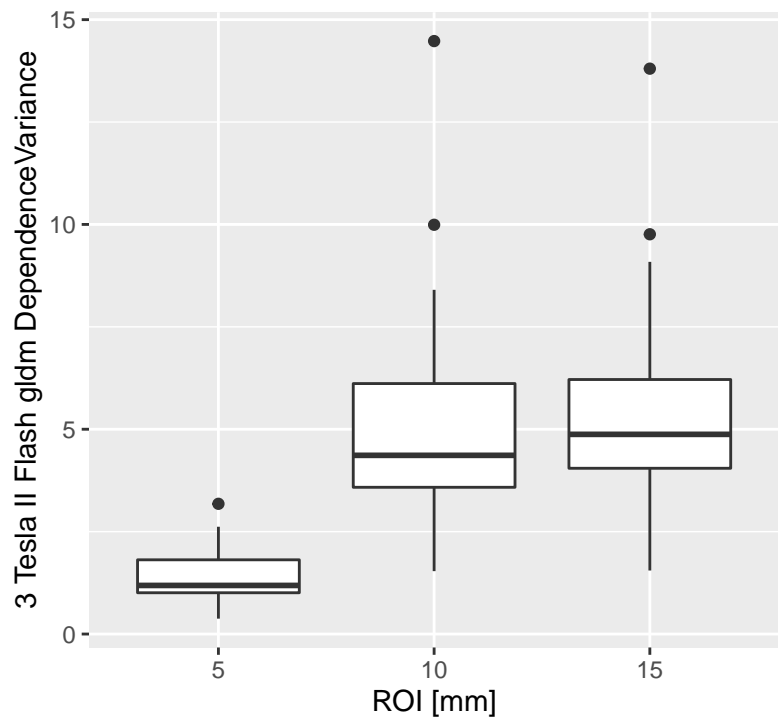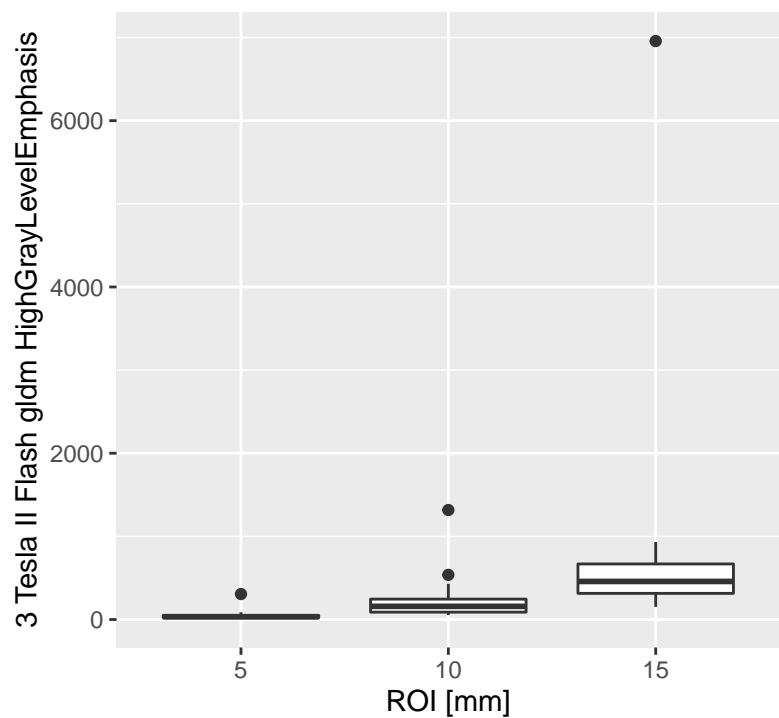

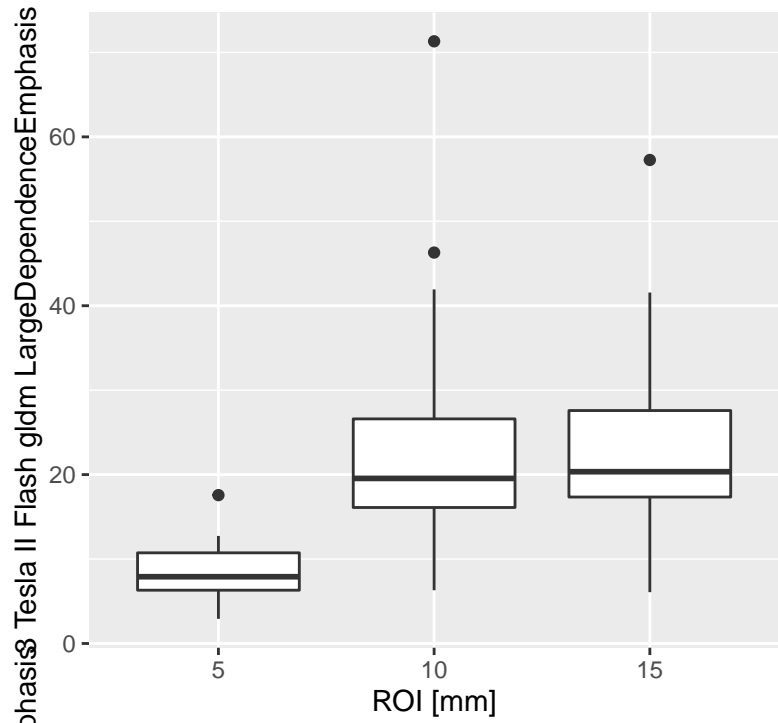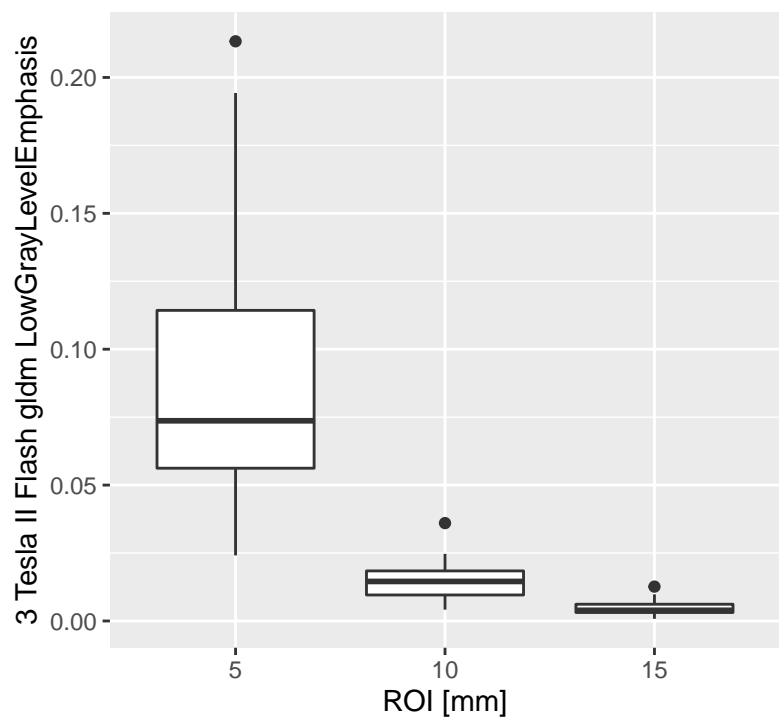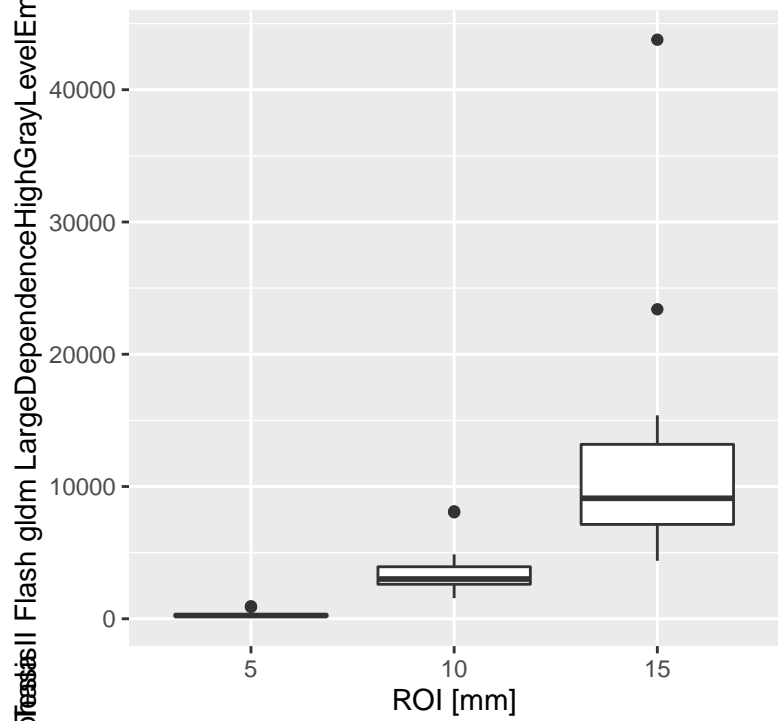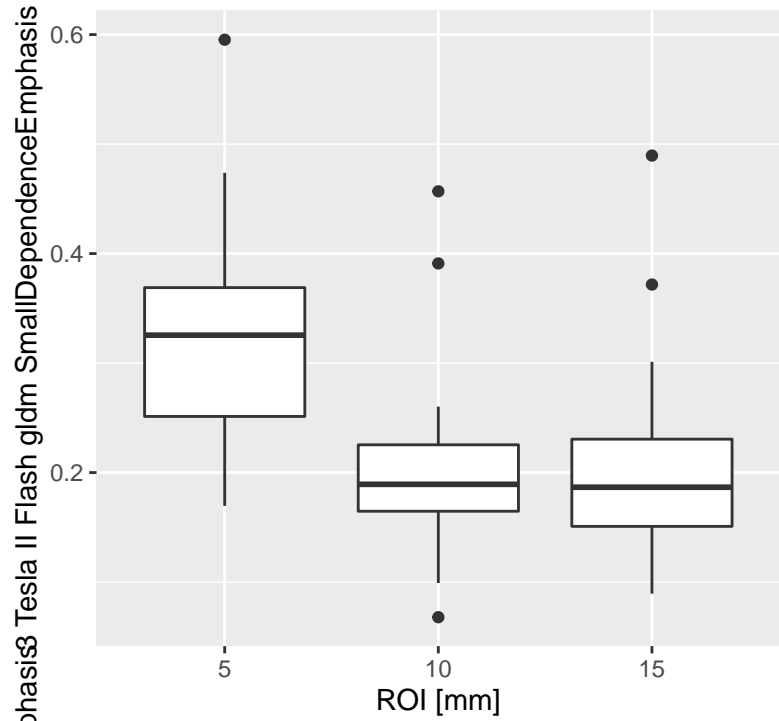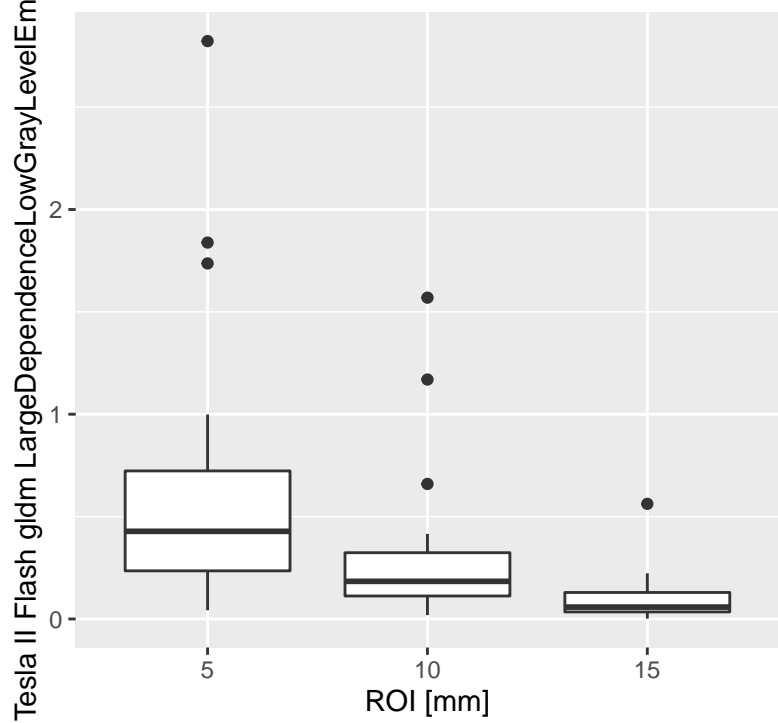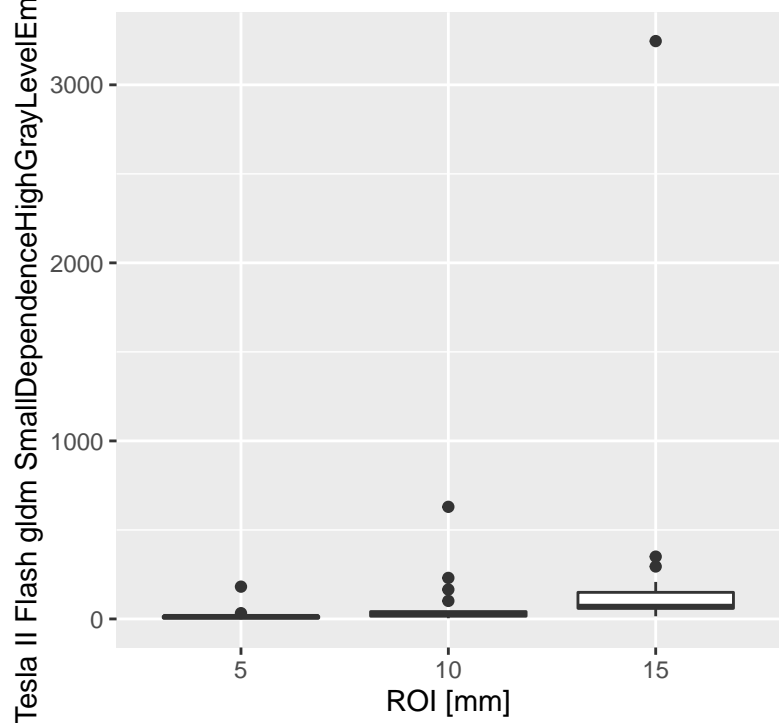

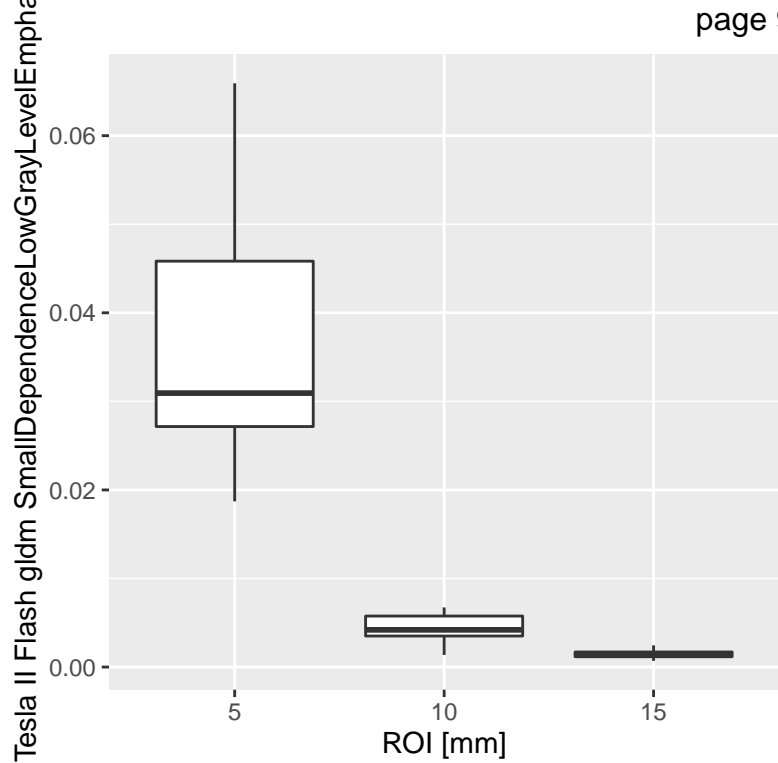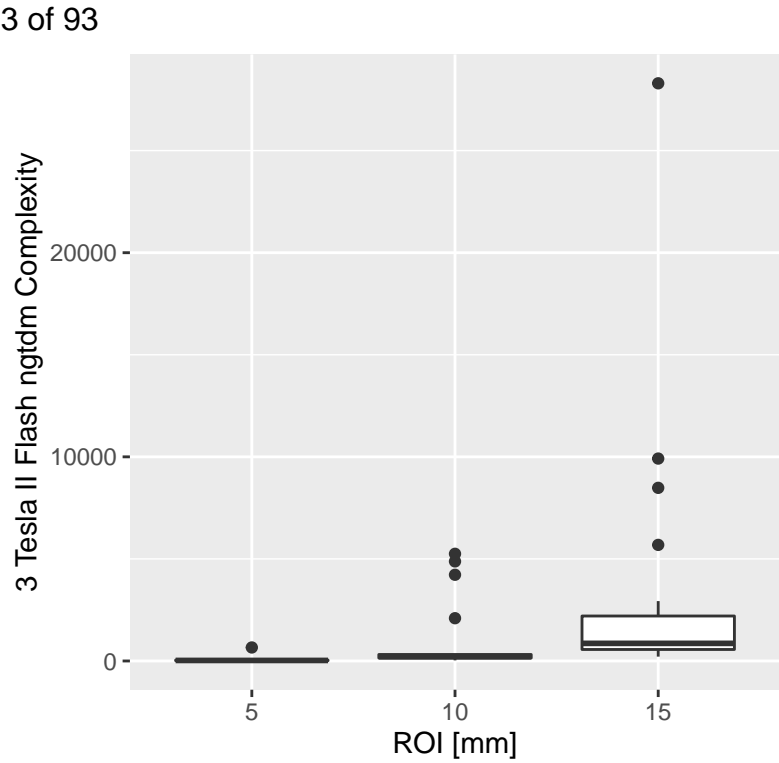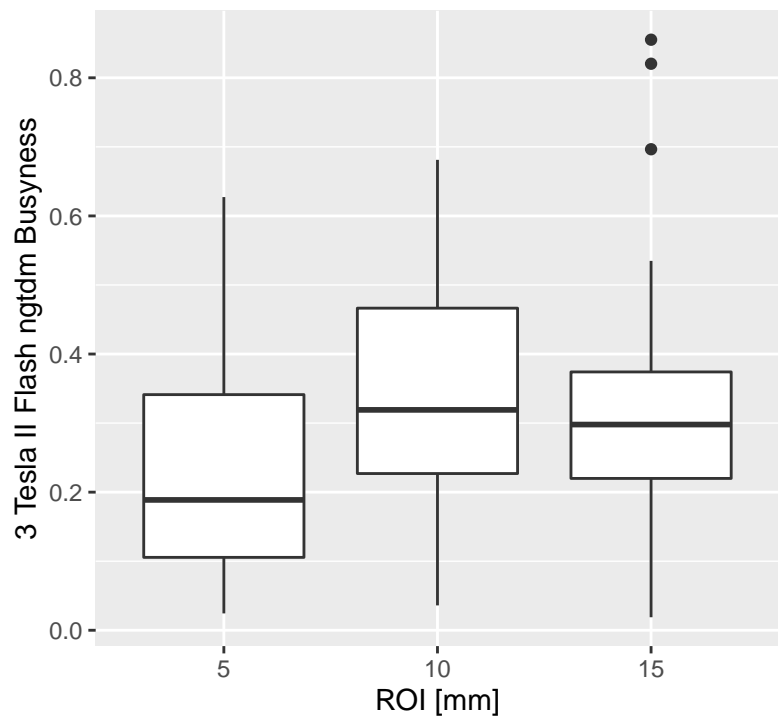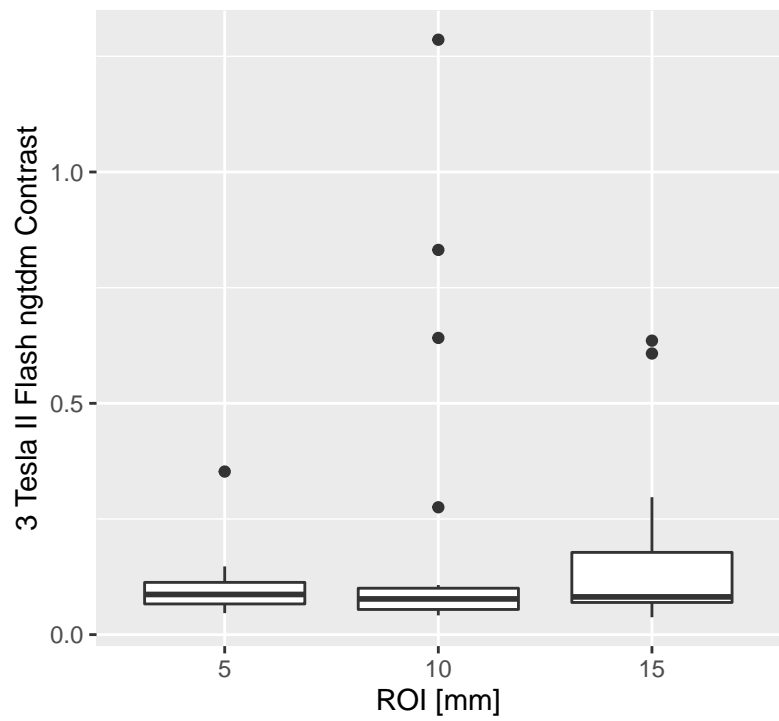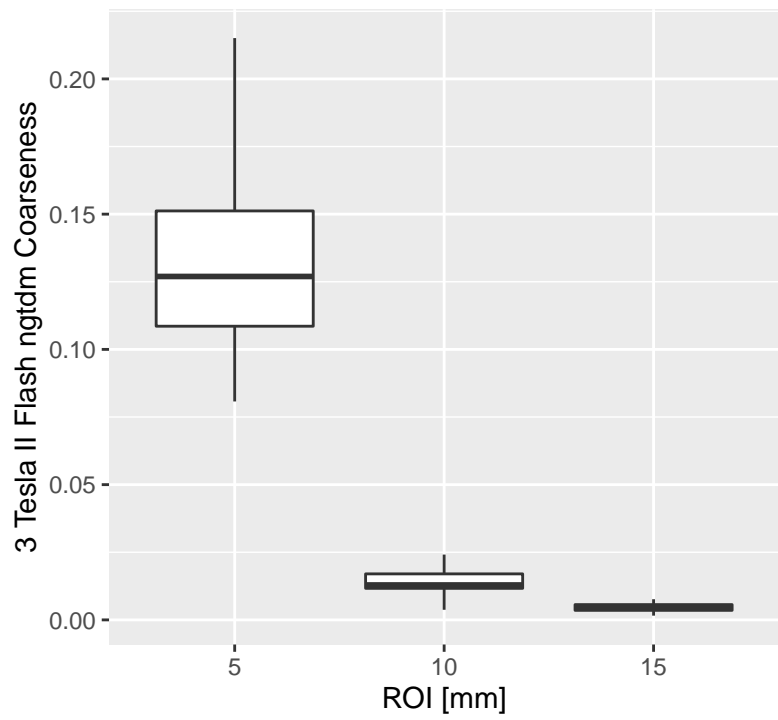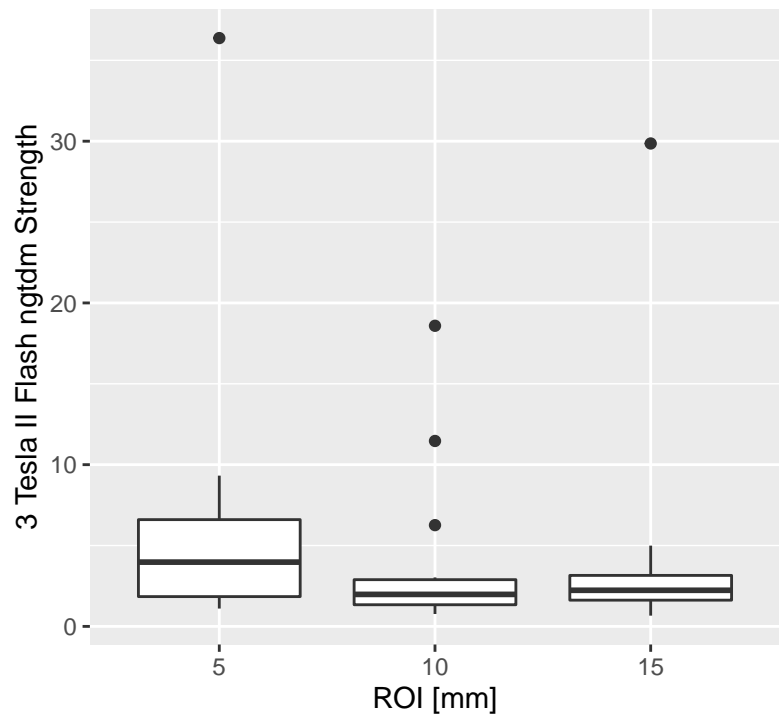

Supplement: s1 [file s1]
