# Supplementary material
Source: MDPI journal article supplement (https://www.mdpi.com/2379-139X/7/4/73)
Supplement: s1 [file s1]

# IBSI guidelines for reporting on radiomics studies

Checklist - Version 1.0 (October 2019)

This checklist focuses specifically on in-depth reporting of studies involving radiomics. Other reporting guidelines may be applicable as well, e.g. STROBE (observational studies), CONSORT (randomised trials).

Not all items may be applicable. Indicate only applicable items.

| Topic                           |            | Item | Description                                                                                                 | Page                                                                                       |
|---------------------------------|------------|------|-------------------------------------------------------------------------------------------------------------|--------------------------------------------------------------------------------------------|
|                                 |            |      |                                                                                                             | Please note: We refer to sections and paragraphs as the page number may not be persistent. |
| Patient                         |            |      |                                                                                                             |                                                                                            |
| Region of interest <sup>1</sup> |            | 1    | Describe the region of interest that is being imaged.                                                       | M&M, <i>Study Population and definition of target lesion</i>                               |
| Patient preparation             |            | 2a   | Describe specific instructions given to patients prior to image acquisition, e.g. fasting prior to imaging. | M&M, <i>Image acquisition</i>                                                              |
|                                 |            | 2b   | Describe administration of drugs to the patient prior to image acquisition, e.g. muscle relaxants.          | M&M, <i>Image acquisition</i>                                                              |
|                                 |            | 2c   | Describe the use of specific equipment for patient comfort during scanning, e.g. ear plugs.                 | No special measures                                                                        |
| Radioactive tracer              | PET, SPECT | 3a   | Describe which radioactive tracer was administered to the patient, e.g. 18F-FDG.                            | 3a to e: not applicable                                                                    |
|                                 | PET, SPECT | 3b   | Describe the administration method.                                                                         |                                                                                            |
|                                 | PET, SPECT | 3c   | Describe the injected activity of the radioactive tracer at administration.                                 |                                                                                            |
|                                 | PET, SPECT | 3d   | Describe the uptake time prior to image acquisition.                                                        |                                                                                            |
|                                 | PET, SPECT | 3e   | Describe how competing substance levels were controlled. <sup>2</sup>                                       |                                                                                            |
| Contrast agent                  |            | 4a   | Describe which contrast agent was administered to the patient.                                              | 4a to e: No contrast enhanced images considered                                            |
|                                 |            | 4b   | Describe the administration method.                                                                         |                                                                                            |
|                                 |            | 4c   | Describe the injected quantity of contrast agent.                                                           |                                                                                            |
|                                 |            | 4d   | Describe the uptake time prior to image acquisition.                                                        |                                                                                            |
|                                 |            | 4e   | Describe how competing substance levels were controlled.                                                    |                                                                                            |
| Comorbidities                   |            | 5    | Describe if the patients have comorbidities that affect imaging. <sup>3</sup>                               | M&M, <i>Study population</i>                                                               |

<sup>1</sup> Also referred to as volume of interest.

<sup>2</sup> An example is glucose present in the blood which competes with the uptake of 18F-FDG tracer in tumour tissue. To reduce competition with the tracer, patients are usually asked to fast for several hours and a blood glucose measurement may be conducted prior to tracer administration.

<sup>3</sup> An example of a comorbidity that may affect image quality in 18F-FDG PET scans are type I and type II diabetes melitus, as well as kidney failure.

| <b>Acquisition<sup>4</sup></b>    |               |     |                                                                                                             |
|-----------------------------------|---------------|-----|-------------------------------------------------------------------------------------------------------------|
| Acquisition protocol              |               | 6   | Describe whether a standard imaging protocol was used, and where its description may be found.              |
| Scanner type                      |               | 7   | Describe the scanner type(s) and vendor(s) used in the study.                                               |
| Imaging modality                  |               | 8   | Clearly state the imaging modality that was used in the study, e.g. CT, MRI.                                |
| Static/dynamic scans              |               | 9a  | State if the scans were static or dynamic.                                                                  |
|                                   | Dynamic scans | 9b  | Describe the acquisition time per time frame.                                                               |
|                                   | Dynamic scans | 9c  | Describe any temporal modelling technique that was used.                                                    |
| Scanner calibration               |               | 10  | Describe how and when the scanner was calibrated.                                                           |
| Patient instructions              |               | 11  | Describe specific instructions given to the patient during acquisition, e.g. breath holding.                |
| Anatomical motion correction      |               | 12  | Describe the method used to minimise the effect of anatomical motion.                                       |
| Scan duration                     |               | 13  | Describe the duration of the complete scan or the time per bed position.                                    |
| Tube voltage                      | CT            | 14  | Describe the peak kilo voltage output of the X-ray source.                                                  |
| Tube current                      | CT            | 15  | Describe the tube current in mA.                                                                            |
| Time-of-flight                    | PET           | 16  | State if scanner time-of-flight capabilities are used during acquisition.                                   |
| RF coil                           | MRI           | 17  | Describe what kind RF coil used for acquisition, incl. vendor.                                              |
| Scanning sequence                 | MRI           | 18a | Describe which scanning sequence was acquired.                                                              |
|                                   | MRI           | 18b | Describe which sequence variant was acquired.                                                               |
|                                   | MRI           | 18c | Describe which scan options apply to the current sequence, e.g. flow compensation, cardiac gating.          |
| Repetition time                   | MRI           | 19  | Describe the time in ms between subsequent pulse sequences.                                                 |
| Echo time                         | MRI           | 20  | Describe the echo time in ms.                                                                               |
| Echo train length                 | MRI           | 21  | Describe the number of lines in k-space that are acquired per excitation pulse.                             |
| Inversion time                    | MRI           | 22  | Describe the time in ms between the middle of the inverting RF pulse to the middle of the excitation pulse. |
| Flip angle                        | MRI           | 23  | Describe the flip angle produced by the RF pulses.                                                          |
| Acquisition type                  | MRI           | 24  | Describe the acquisition type of the MRI scan, e.g. 3D.                                                     |
| k-space traversal                 | MRI           | 25  | Describe the acquisition trajectory of the k-space.                                                         |
| Number of averages/ excitations   | MRI           | 26  | Describe the number of times each point in k-space is sampled.                                              |
| Magnetic field strength           | MRI           | 27  | Describe the nominal strength of the MR magnetic field.                                                     |
| <b>Reconstruction<sup>5</sup></b> |               |     |                                                                                                             |
| In-plane resolution               |               | 28  | Describe the distance between pixels, or alternatively the field of view and matrix size.                   |
| Image slice thickness             |               | 29  | Describe the slice thickness.                                                                               |
| Image slice spacing               |               | 30  | Describe the distance between image slices. <sup>6</sup>                                                    |
| Convolution kernel                | CT            | 31a | Describe the convolution kernel used to reconstruct the image.                                              |
|                                   | CT            | 31b | Describe settings pertaining to iterative reconstruction algorithms.                                        |
| Exposure                          | CT            | 31c | Describe the exposure (in mAs) in slices containing the                                                     |

<sup>4</sup> Many acquisition parameters may be extracted from DICOM header meta-data, or calculated from them.

<sup>5</sup> Many reconstruction parameters may be extracted from DICOM header meta-data.

<sup>6</sup> Spacing between image slicing is commonly, but not necessarily, the same as the slice thickness,.

|                                                       |             |     |                                                                                                                                      |                                                              |
|-------------------------------------------------------|-------------|-----|--------------------------------------------------------------------------------------------------------------------------------------|--------------------------------------------------------------|
|                                                       |             |     | region of interest.                                                                                                                  |                                                              |
| Reconstruction method                                 | PET         | 32a | Describe which reconstruction method was used, e.g. 3D OSEM.                                                                         |                                                              |
|                                                       | PET         | 32b | Describe the number of iterations for iterative reconstruction.                                                                      |                                                              |
|                                                       | PET         | 32c | Describe the number of subsets for iterative reconstruction.                                                                         | 32a to 34a: not applicable                                   |
| Point spread function modelling                       | PET         | 33  | Describe if and how point-spread function modelling was performed.                                                                   |                                                              |
| Image corrections                                     | PET         | 34a | Describe if and how attenuation correction was performed.                                                                            |                                                              |
|                                                       | PET         | 34b | Describe if and how other forms of correction were performed, e.g. scatter correction, randoms correction, dead time correction etc. |                                                              |
| Reconstruction method                                 | MRI         | 35a | Describe the reconstruction method used to reconstruct the image from the k-space information.                                       | 35a to 35b: M&M, <i>Image acquisition</i> and table 2        |
|                                                       | MRI         | 35b | Describe any artifact suppression methods used during reconstruction to suppress artifacts due to undersampling of k-space.          |                                                              |
| Diffusion-weighted imaging                            | DWI-MRI     | 36  | Describe the b-values used for diffusion-weighting.                                                                                  | 36: not applicable                                           |
| <b>Image registration</b>                             |             |     |                                                                                                                                      |                                                              |
| Registration method                                   |             | 37  | Describe the method used to register multi-modality imaging.                                                                         | not applicable                                               |
| <b>Image processing - data conversion</b>             |             |     |                                                                                                                                      |                                                              |
| SUV normalisation                                     | PET         | 38  | Describe which standardised uptake value (SUV) normalisation method is used.                                                         | not applicable                                               |
| ADC computation                                       | DWI-MRI     | 39  | Describe how apparent diffusion coefficient (ADC) values were calculated.                                                            | not applicable                                               |
| Other data conversions                                |             | 40  | Describe any other conversions that are performed to generate e.g. perfusion maps.                                                   | not applicable                                               |
| <b>Image processing - post-acquisition processing</b> |             |     |                                                                                                                                      |                                                              |
| Anti-aliasing                                         |             | 41  | Describe the method used to deal with anti-aliasing when down-sampling during interpolation.                                         | 41 to 42: M&M, Study population and <i>Image acquisition</i> |
| Noise suppression                                     |             | 42  | Describe methods used to suppress image noise.                                                                                       |                                                              |
| Post-reconstruction smoothing filter                  | PET         | 43  | Describe the width of the Gaussian filter (FWHM) to spatially smooth intensities.                                                    |                                                              |
| Skull stripping                                       | MRI (brain) | 44  | Describe method used to perform skull stripping.                                                                                     | not applicable                                               |
| Non-uniformity correction <sup>7</sup>                | MRI         | 45  | Describe the method and settings used to perform non-uniformity correction.                                                          | not applicable                                               |
| Intensity normalisation                               |             | 46  | Describe the method and settings used to normalize intensity distributions within a patient or patient cohort.                       | No normalization was performed                               |
| Other post-acquisition processing methods             |             | 47  | Describe any other methods that were used to process the image and are not mentioned separately in this list.                        | not applicable                                               |
| <b>Segmentation</b>                                   |             |     |                                                                                                                                      |                                                              |
| Segmentation method                                   |             | 48a | Describe how regions of interest were segmented, e.g. manually.                                                                      |                                                              |
|                                                       |             | 48b | Describe the number of experts, their expertise and consensus strategies for manual delineation.                                     | 48a to d: M&M, <i>Image analysis</i>                         |
|                                                       |             | 48c | Describe methods and settings used for semi-automatic and fully automatic segmentation.                                              |                                                              |
|                                                       |             | 48d | Describe which image was used to define segmentation in case of multi-modality imaging.                                              |                                                              |
| Conversion to mask                                    |             | 49  | Describe the method used to convert polygonal or mesh-based segmentations to a voxel-based mask.                                     | not applicable                                               |
| <b>Image processing - image interpolation</b>         |             |     |                                                                                                                                      |                                                              |

<sup>7</sup> Also known as bias-field correction.

|                                                    |     |                                                                                                                                 |                                                                                                                                                                      |
|----------------------------------------------------|-----|---------------------------------------------------------------------------------------------------------------------------------|----------------------------------------------------------------------------------------------------------------------------------------------------------------------|
| Interpolation method                               | 50a | Describe which interpolation algorithm was used to interpolate the image.                                                       | No specific image interpolation applied                                                                                                                              |
|                                                    | 50b | Describe how the position of the interpolation grid was defined, e.g. align by center.                                          |                                                                                                                                                                      |
|                                                    | 50c | Describe how the dimensions of the interpolation grid were defined, e.g. rounded to nearest integer.                            |                                                                                                                                                                      |
|                                                    | 50d | Describe how extrapolation beyond the original image was handled.                                                               |                                                                                                                                                                      |
| Voxel dimensions                                   | 51  | Describe the size of the interpolated voxels.                                                                                   |                                                                                                                                                                      |
| Intensity rounding                                 | CT  | 52                                                                                                                              | Describe how fractional Hounsfield Units are rounded to integer values after interpolation.                                                                          |
| Image processing - ROI interpolation               |     |                                                                                                                                 |                                                                                                                                                                      |
| Interpolation method                               | 53  | Describe which interpolation algorithm was used to interpolate the region of interest mask.                                     | No specific image interpolation applied                                                                                                                              |
| Partially masked voxels                            | 54  | Describe how partially masked voxels after interpolation are handled.                                                           |                                                                                                                                                                      |
| Image processing - re-segmentation                 |     |                                                                                                                                 |                                                                                                                                                                      |
| Re-segmentation methods                            | 55  | Describe which methods and settings are used to re-segment the ROI intensity mask.                                              | No re-segmentation was performed.                                                                                                                                    |
| Image processing - discretisation                  |     |                                                                                                                                 |                                                                                                                                                                      |
| Discretisation method <sup>8</sup>                 | 56a | Describe the method used to discretise image intensities.                                                                       | Fixed bin size provided in configuration file. No further steps to discretize intensities.<br><br>0 (voxelshift of 1000 applied, see also PyRadiomics configuration) |
|                                                    | 56b | Describe the number of bins (FBN) or the bin size (FBS) used for discretisation.                                                |                                                                                                                                                                      |
|                                                    | 56c | Describe the lowest intensity in the first bin for FBS discretisation. <sup>9</sup>                                             |                                                                                                                                                                      |
| Image processing - image transformation            |     |                                                                                                                                 |                                                                                                                                                                      |
| Image filter <sup>10</sup>                         | 57  | Describe the methods and settings used to filter images, e.g. Laplacian-of-Gaussian.                                            | No filters applied                                                                                                                                                   |
| Radiomics feature computation                      |     |                                                                                                                                 |                                                                                                                                                                      |
| Feature set                                        | 58  | Describe which set of radiomics features is computed and refer to their definitions or provide these.                           | 58 to 61: M&M, Radiomic Feature Extraction                                                                                                                           |
| IBSI compliance                                    | 59  | State if the software used to extract the set of features is able to reproduce the IBSI feature reference values. <sup>11</sup> |                                                                                                                                                                      |
| Robustness                                         | 60  | Describe how robustness of the features was assessed, e.g. test-retest analysis.                                                |                                                                                                                                                                      |
| Software availability                              | 61  | Describe which software and version was used to compute features.                                                               |                                                                                                                                                                      |
| Radiomics feature computation - texture parameters |     |                                                                                                                                 |                                                                                                                                                                      |
| Texture matrix aggregation                         | 62  | Define how texture-matrix based features were computed from underlying texture matrices.                                        | 62 to 71: We can only refer to the source code of PyRadiomics here                                                                                                   |
| Distance weighting                                 | 63  | Define how CM, RLM, NGTDM and NGLDM weight distances, e.g. no weighting.                                                        |                                                                                                                                                                      |
| CM symmetry                                        | 64  | Define whether symmetric or asymmetric co-occurrence                                                                            |                                                                                                                                                                      |

<sup>8</sup> Discretisation may be performed separately to create intensity-volume histograms. If this is indeed the case, this should be described as well.

<sup>9</sup> This is typically set by range re-segmentation.

<sup>10</sup> The IBSI has not introduced image transformation into the standardised image processing scheme, and is in the process of benchmarking various common filters. This section may therefore be expanded in the future.

<sup>11</sup> A software is compliant if and only if it is able to reproduce the feature reference values for the digital phantom and for one or more image processing configurations using the radiomics CT phantom. Reviewers may demand that you provide the IBSI compliance spreadsheet for your software.

|                                                |    |                                                                                                                                                                                                |                                                                   |
|------------------------------------------------|----|------------------------------------------------------------------------------------------------------------------------------------------------------------------------------------------------|-------------------------------------------------------------------|
|                                                |    | matrices were computed.                                                                                                                                                                        |                                                                   |
| CM distance                                    | 65 | Define the (Chebyshev) distance at which co-occurrence of intensities is determined, e.g. 1.                                                                                                   |                                                                   |
| SZM linkage distance                           | 66 | Define the distance and distance norm for which voxels with the same intensity are considered to belong to the same zone for the purpose of constructing an SZM, e.g. Chebyshev distance of 1. |                                                                   |
| DZM linkage distance                           | 67 | Define the distance and distance norm for which voxels with the same intensity are considered to belong to the same zone for the purpose of constructing a DZM, e.g. Chebyshev distance of 1.  |                                                                   |
| DZM zone distance norm                         | 68 | Define the distance norm for determining the distance of zones to the border of the ROI, e.g. Manhattan distance.                                                                              |                                                                   |
| NGTDM distance                                 | 69 | Define the neighbourhood distance and distance norm for the NGTDM, e.g. Chebyshev distance of 1.                                                                                               |                                                                   |
| NGLDM distance                                 | 70 | Define the neighbourhood distance and distance norm for the NGLDM, e.g. Chebyshev distance of 1.                                                                                               |                                                                   |
| NGLDM coarseness                               | 71 | Define the coarseness parameter for the NGLDM, e.g. 0.                                                                                                                                         |                                                                   |
| <b>Machine learning and radiomics analysis</b> |    |                                                                                                                                                                                                |                                                                   |
| Diagnostic and prognostic modelling            | 72 | See the TRIPOD guidelines for reporting on diagnostic and prognostic modelling.                                                                                                                | 72 to 75: not applicable                                          |
| Comparison with known factors                  | 73 | Describe where performance of radiomics models is compared with known (clinical) factors.                                                                                                      |                                                                   |
| Multicollinearity                              | 74 | Describe where the multicollinearity between radiomics features in the signature is assessed.                                                                                                  |                                                                   |
| Model availability                             | 75 | Describe where radiomics models with the necessary pre-processing information may be found.                                                                                                    |                                                                   |
| Data availability                              | 76 | Describe where imaging data and relevant meta-data used in the study may be found.                                                                                                             | Unfortunately we cannot make image data available for public use. |

The reporting guidelines presented above are a copy of the guidelines found in section 4.1 of the IBSI reference manual (see online supplemental materials).
