# Supplementary material
Source: MDPI journal article supplement (https://www.mdpi.com/2379-139X/7/4/73)

# 3 Tesla I – Haste – 10 / 20 / 30 mm

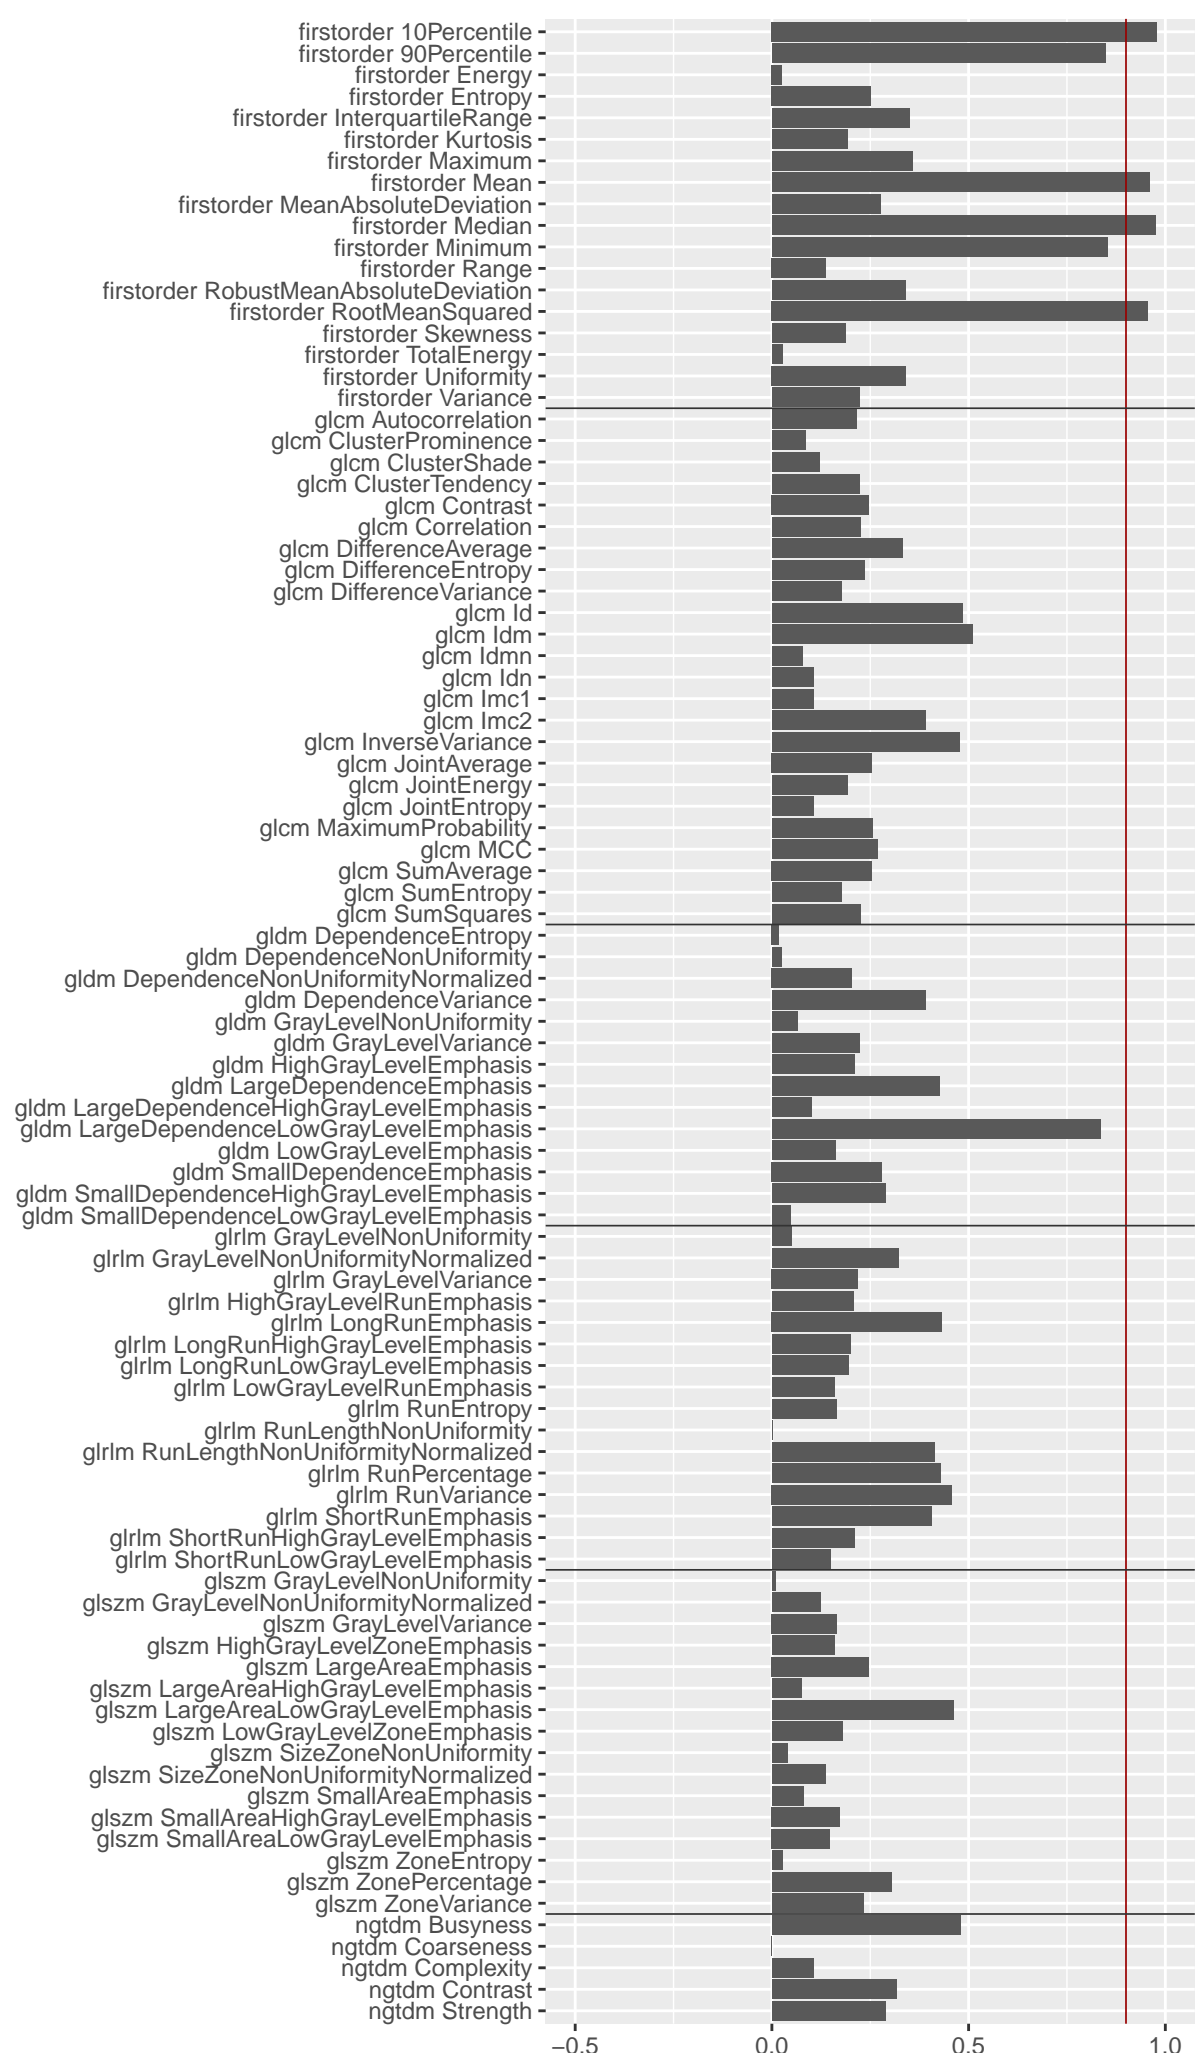

Supplement: s1 [file s1]

# 3 Tesla II – Flash – 10 / 20 / 30 mm

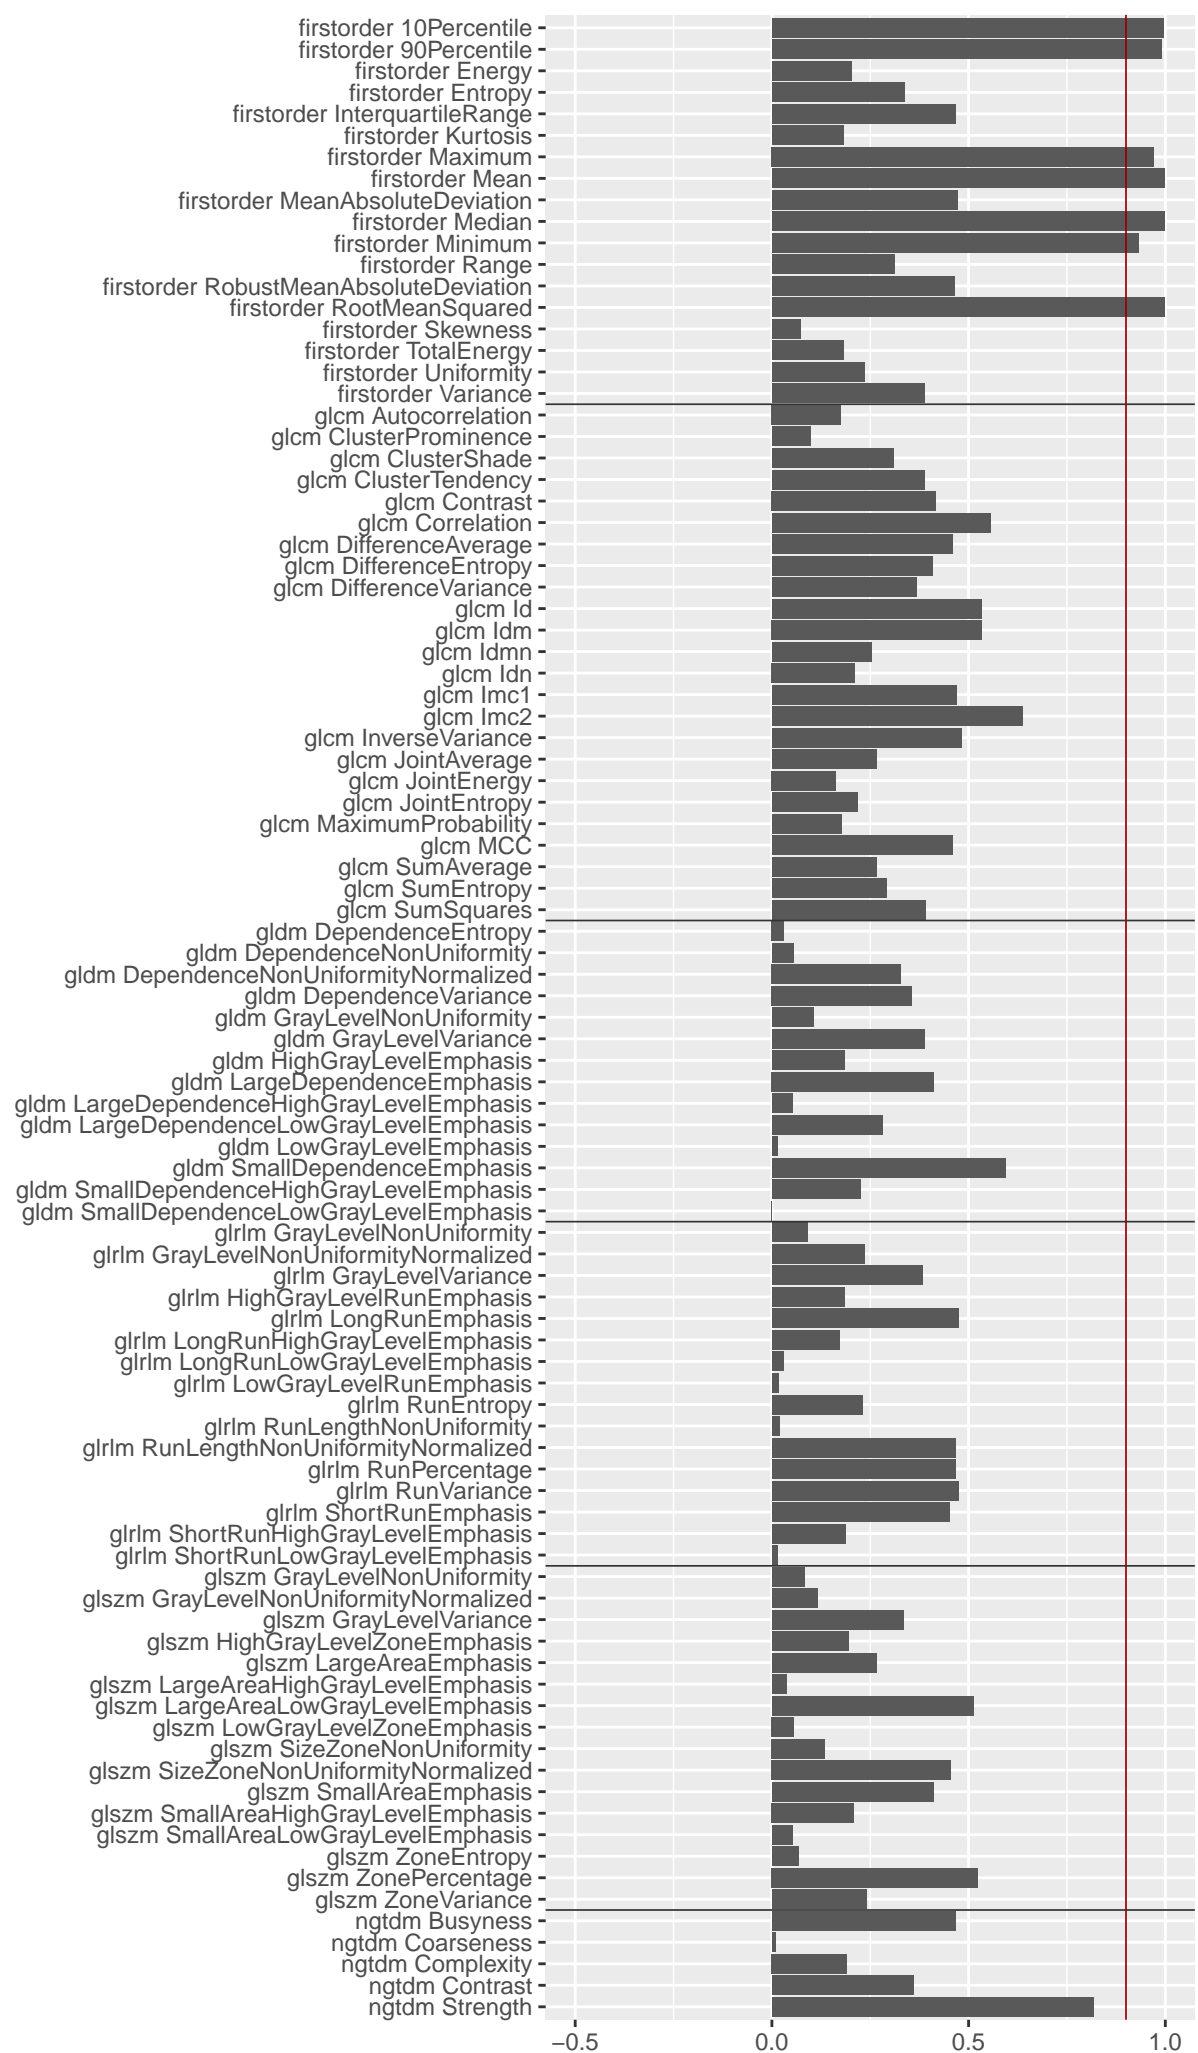

Supplement: s1 [file s1]

# 3 Tesla I – Flash – 10 / 20 mm

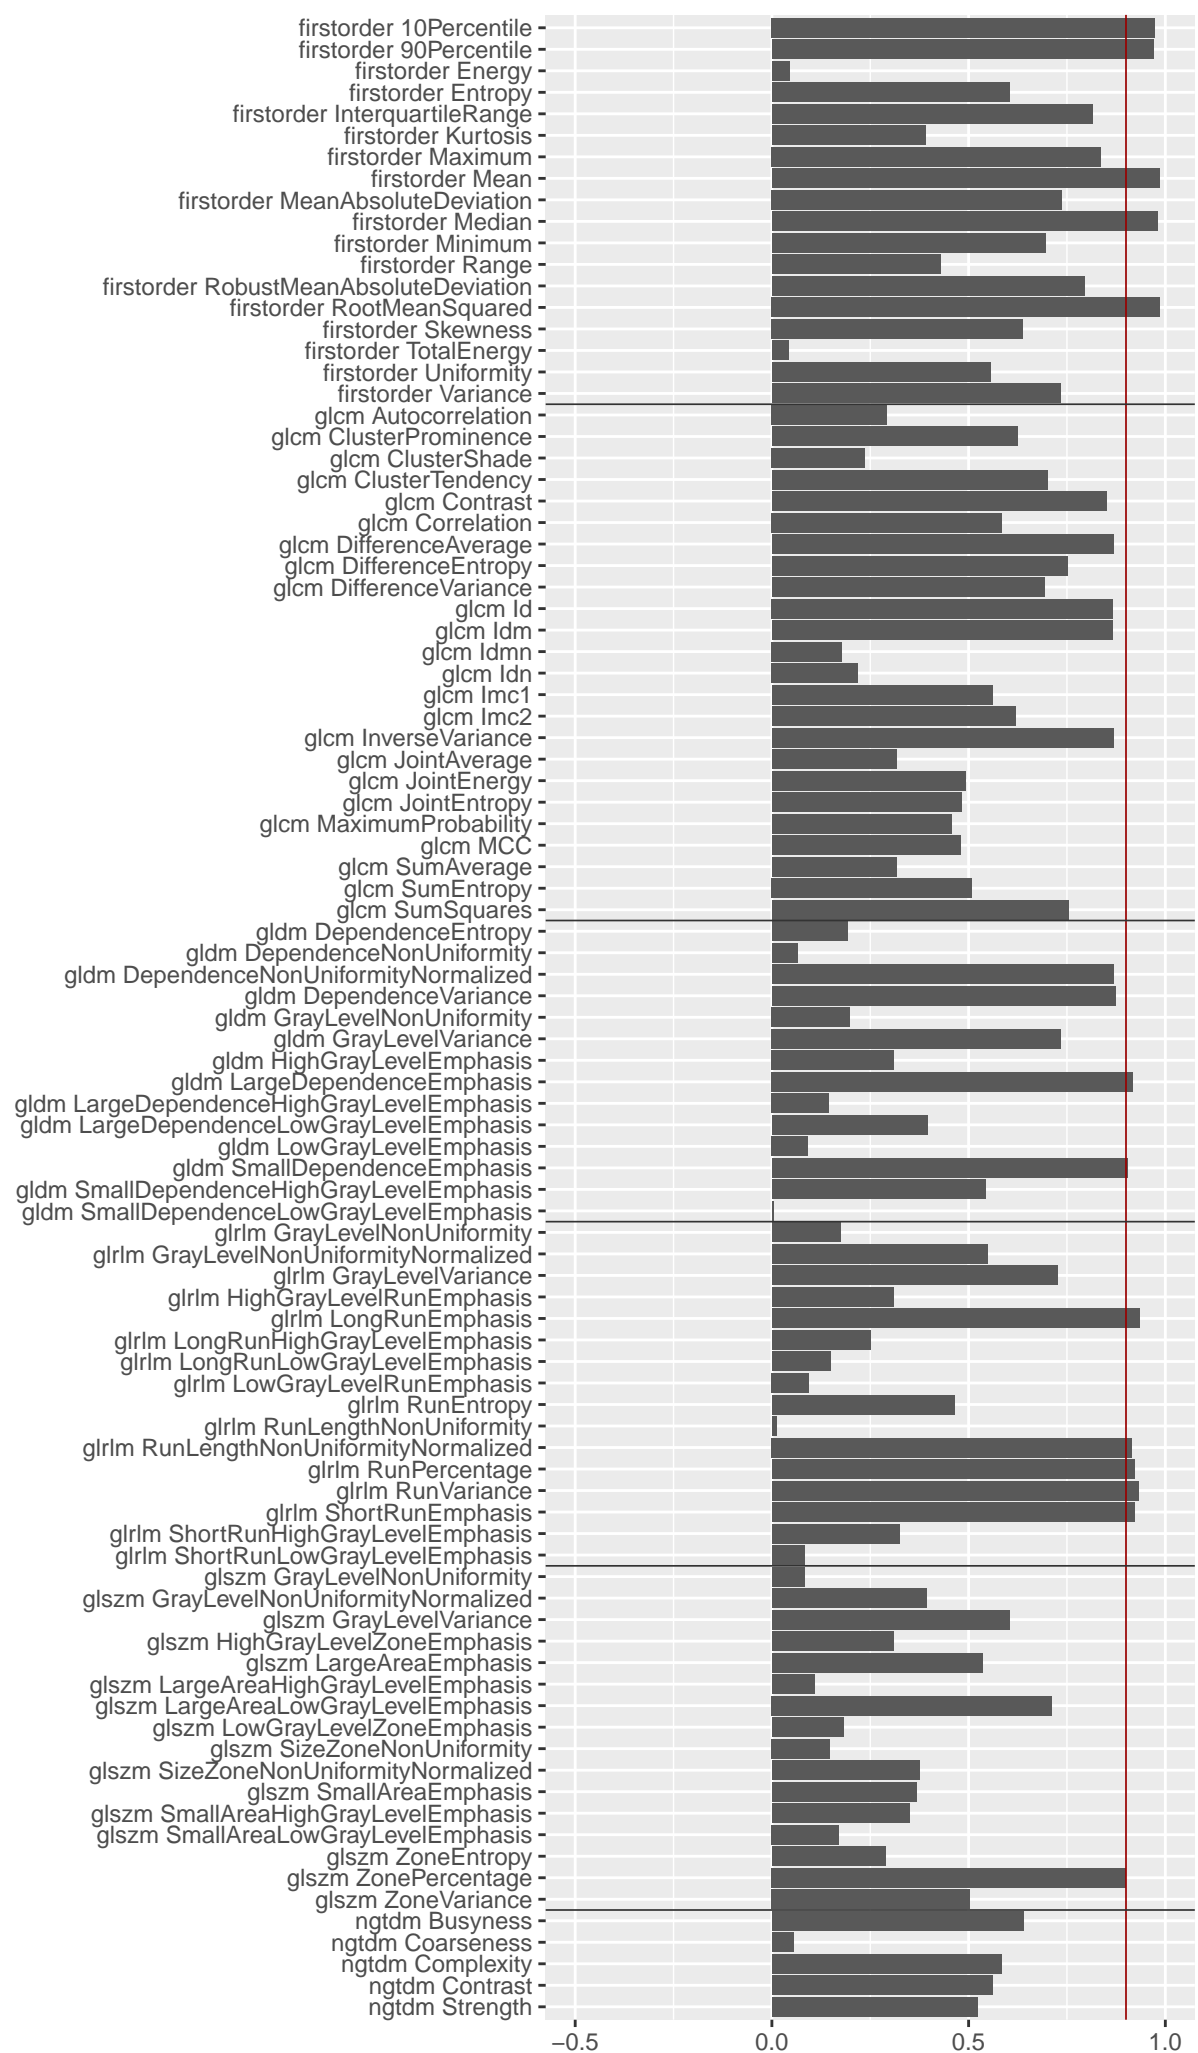

Supplement: s1 [file s1]

### 3 Tesla II – Flash – 10 / 20 mm

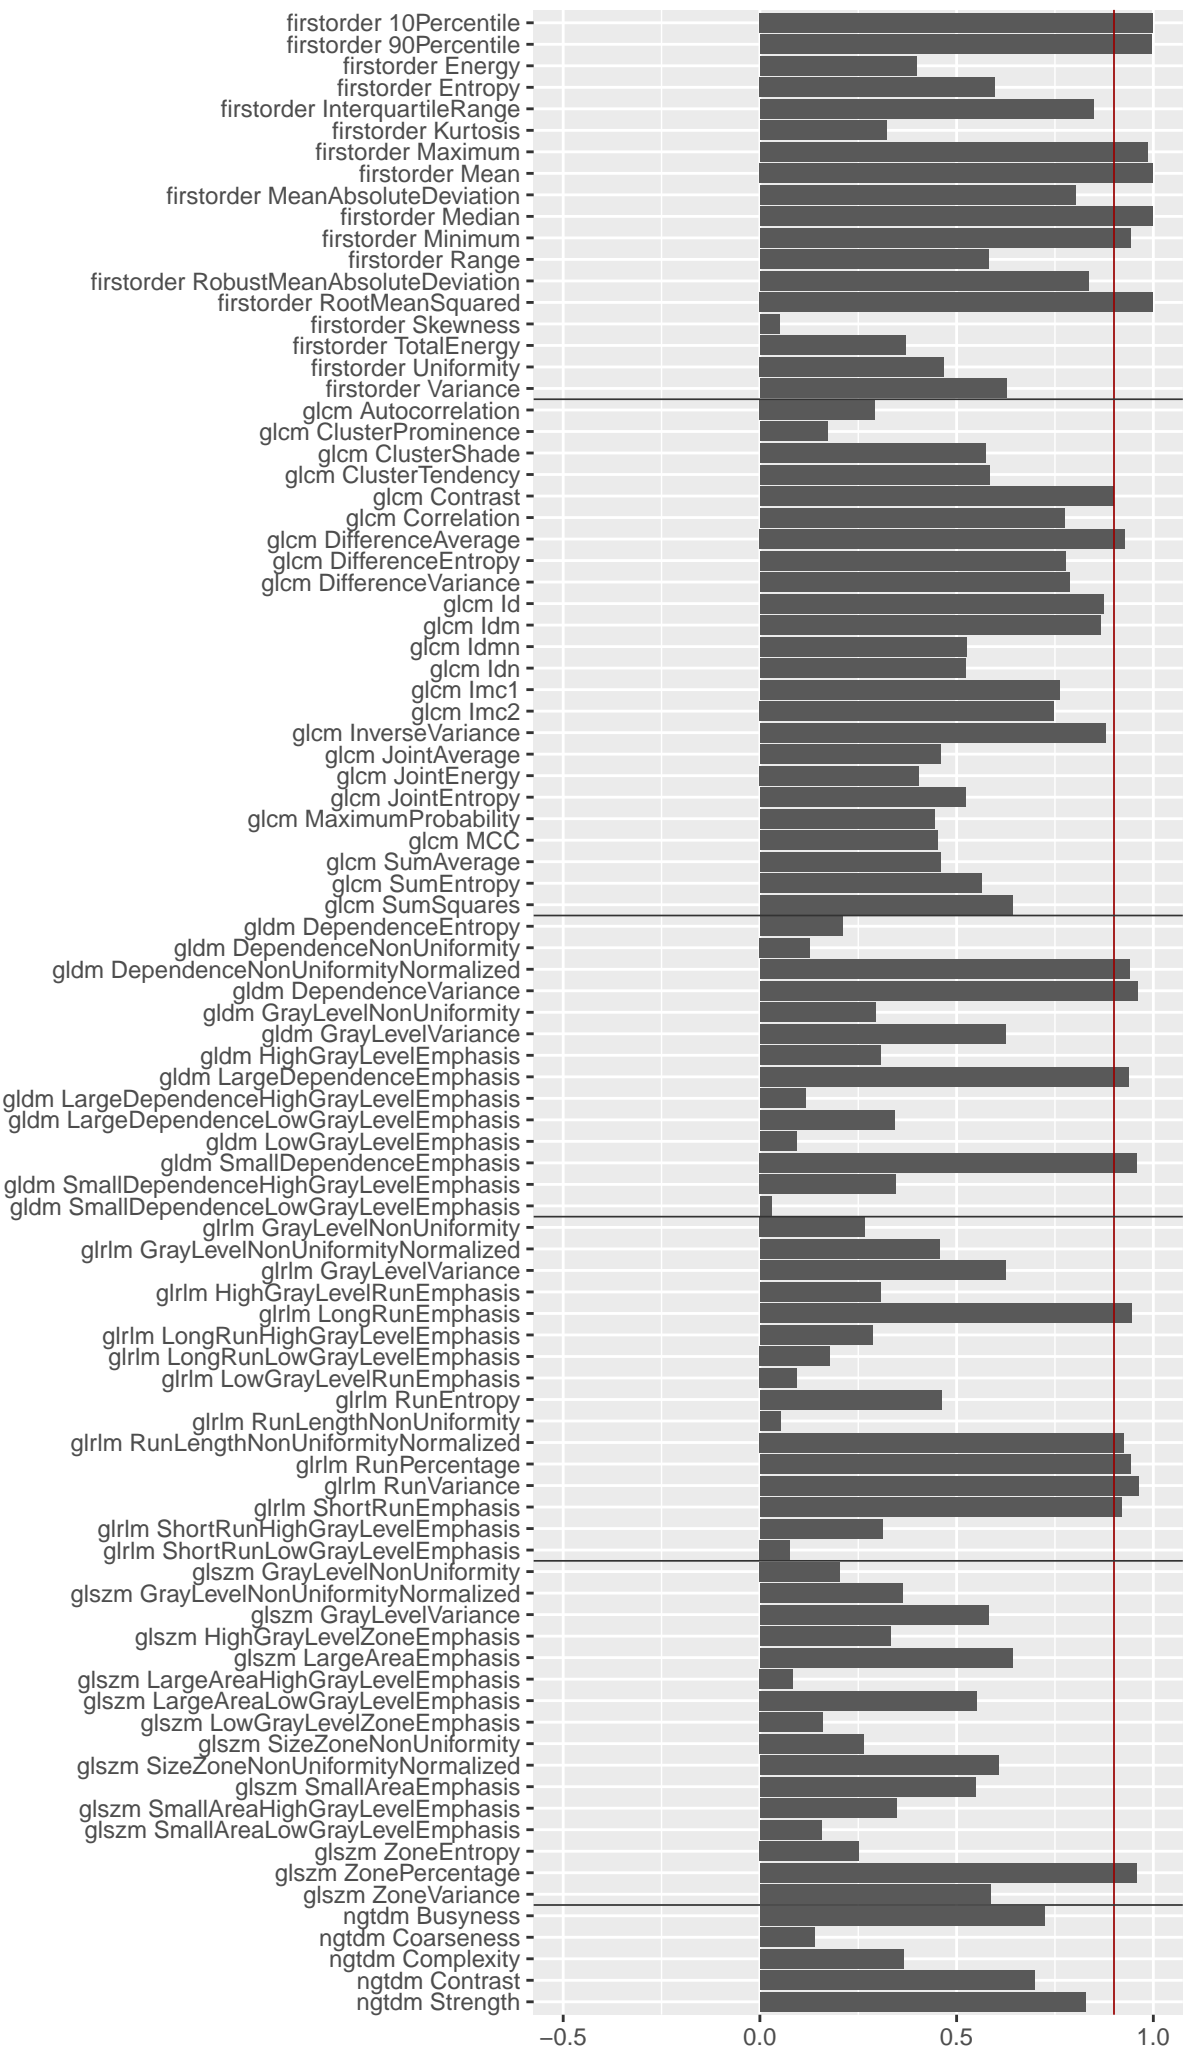

Supplement: s1 [file s1]

# 3 Tesla II – Haste – 10 / 20 / 30 mm

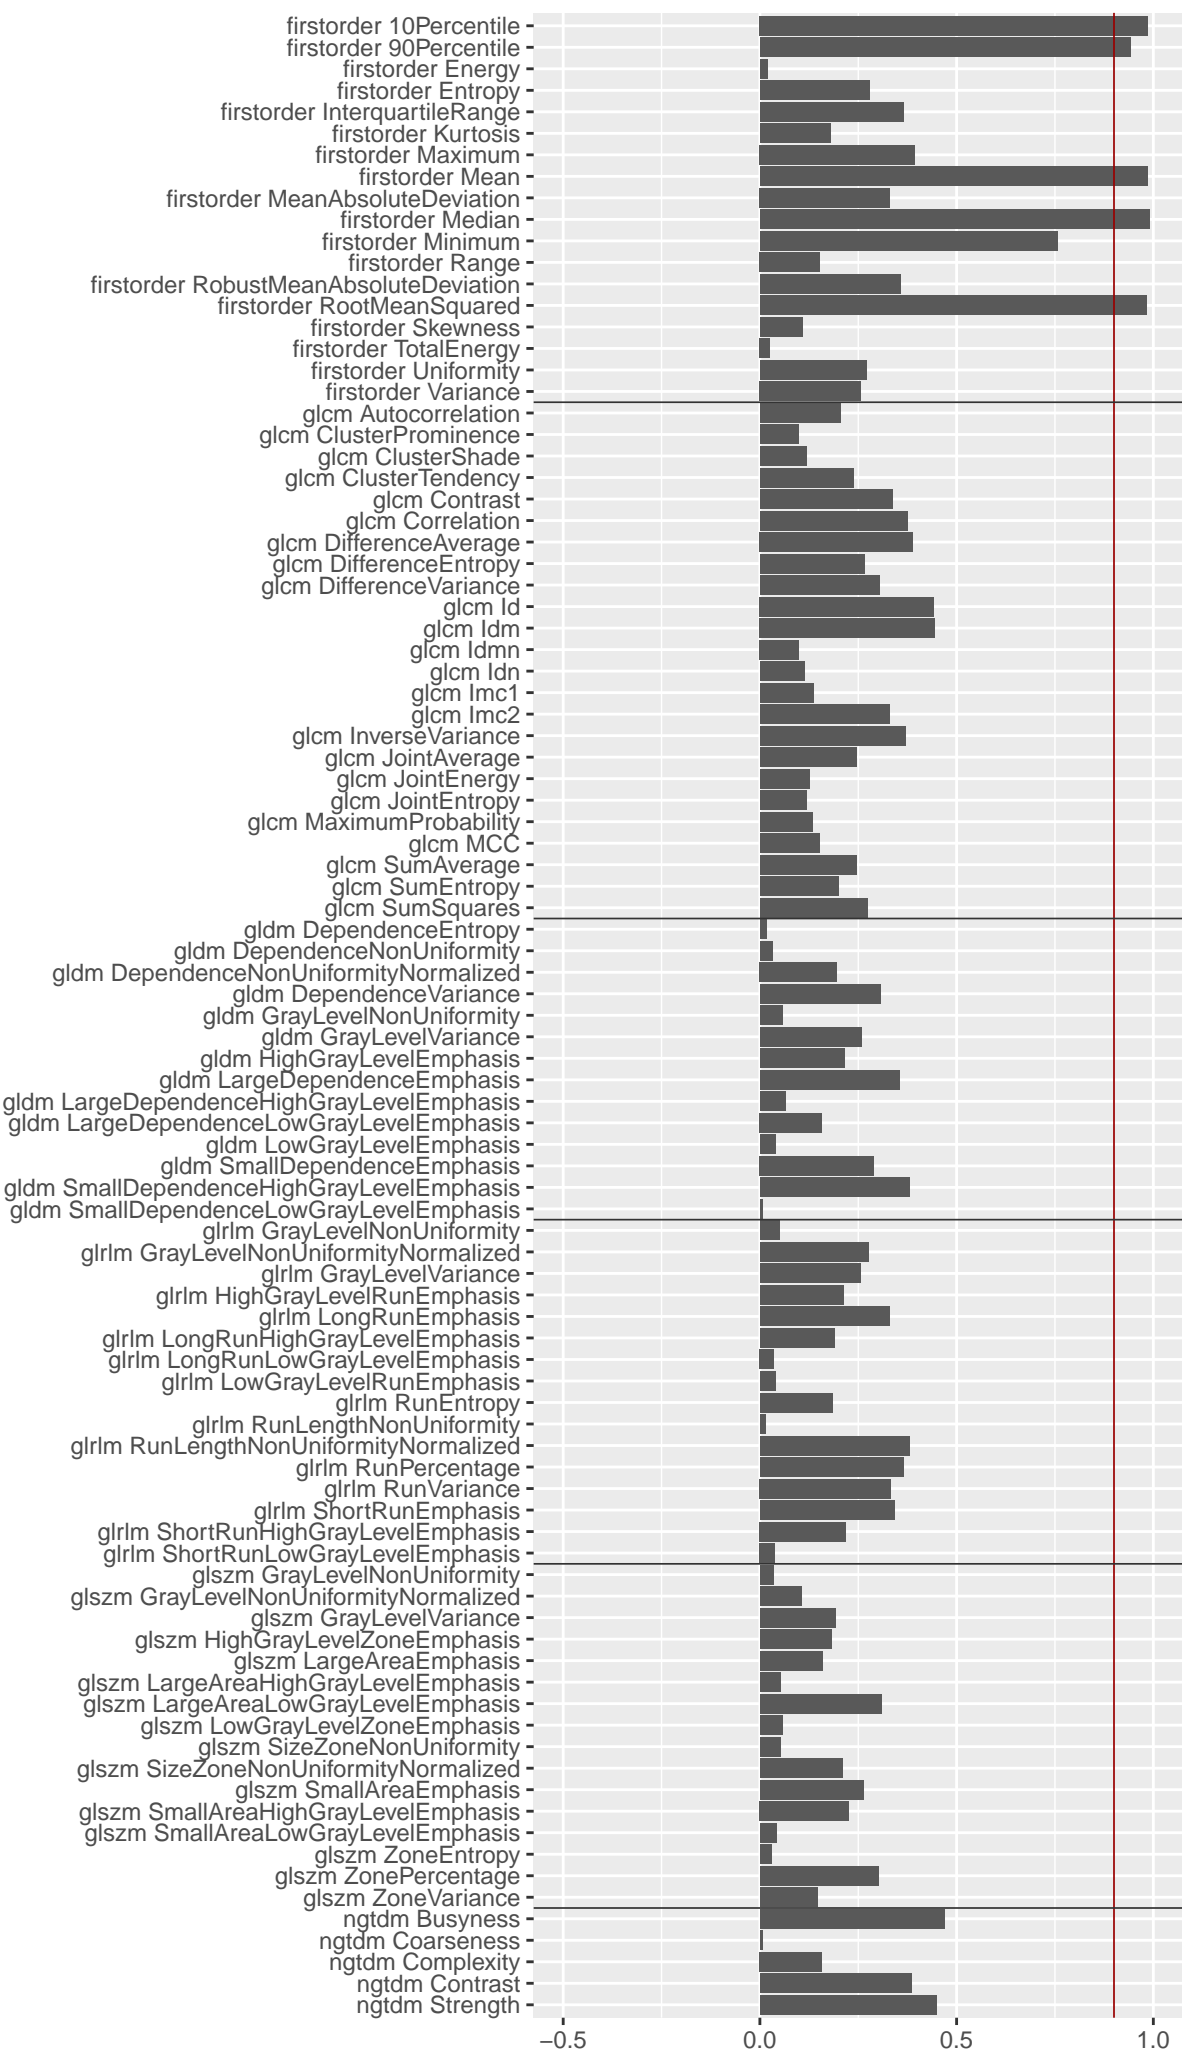

Supplement: s1 [file s1]

# 3 Tesla I – Flash – 10 / 20 / 30 mm

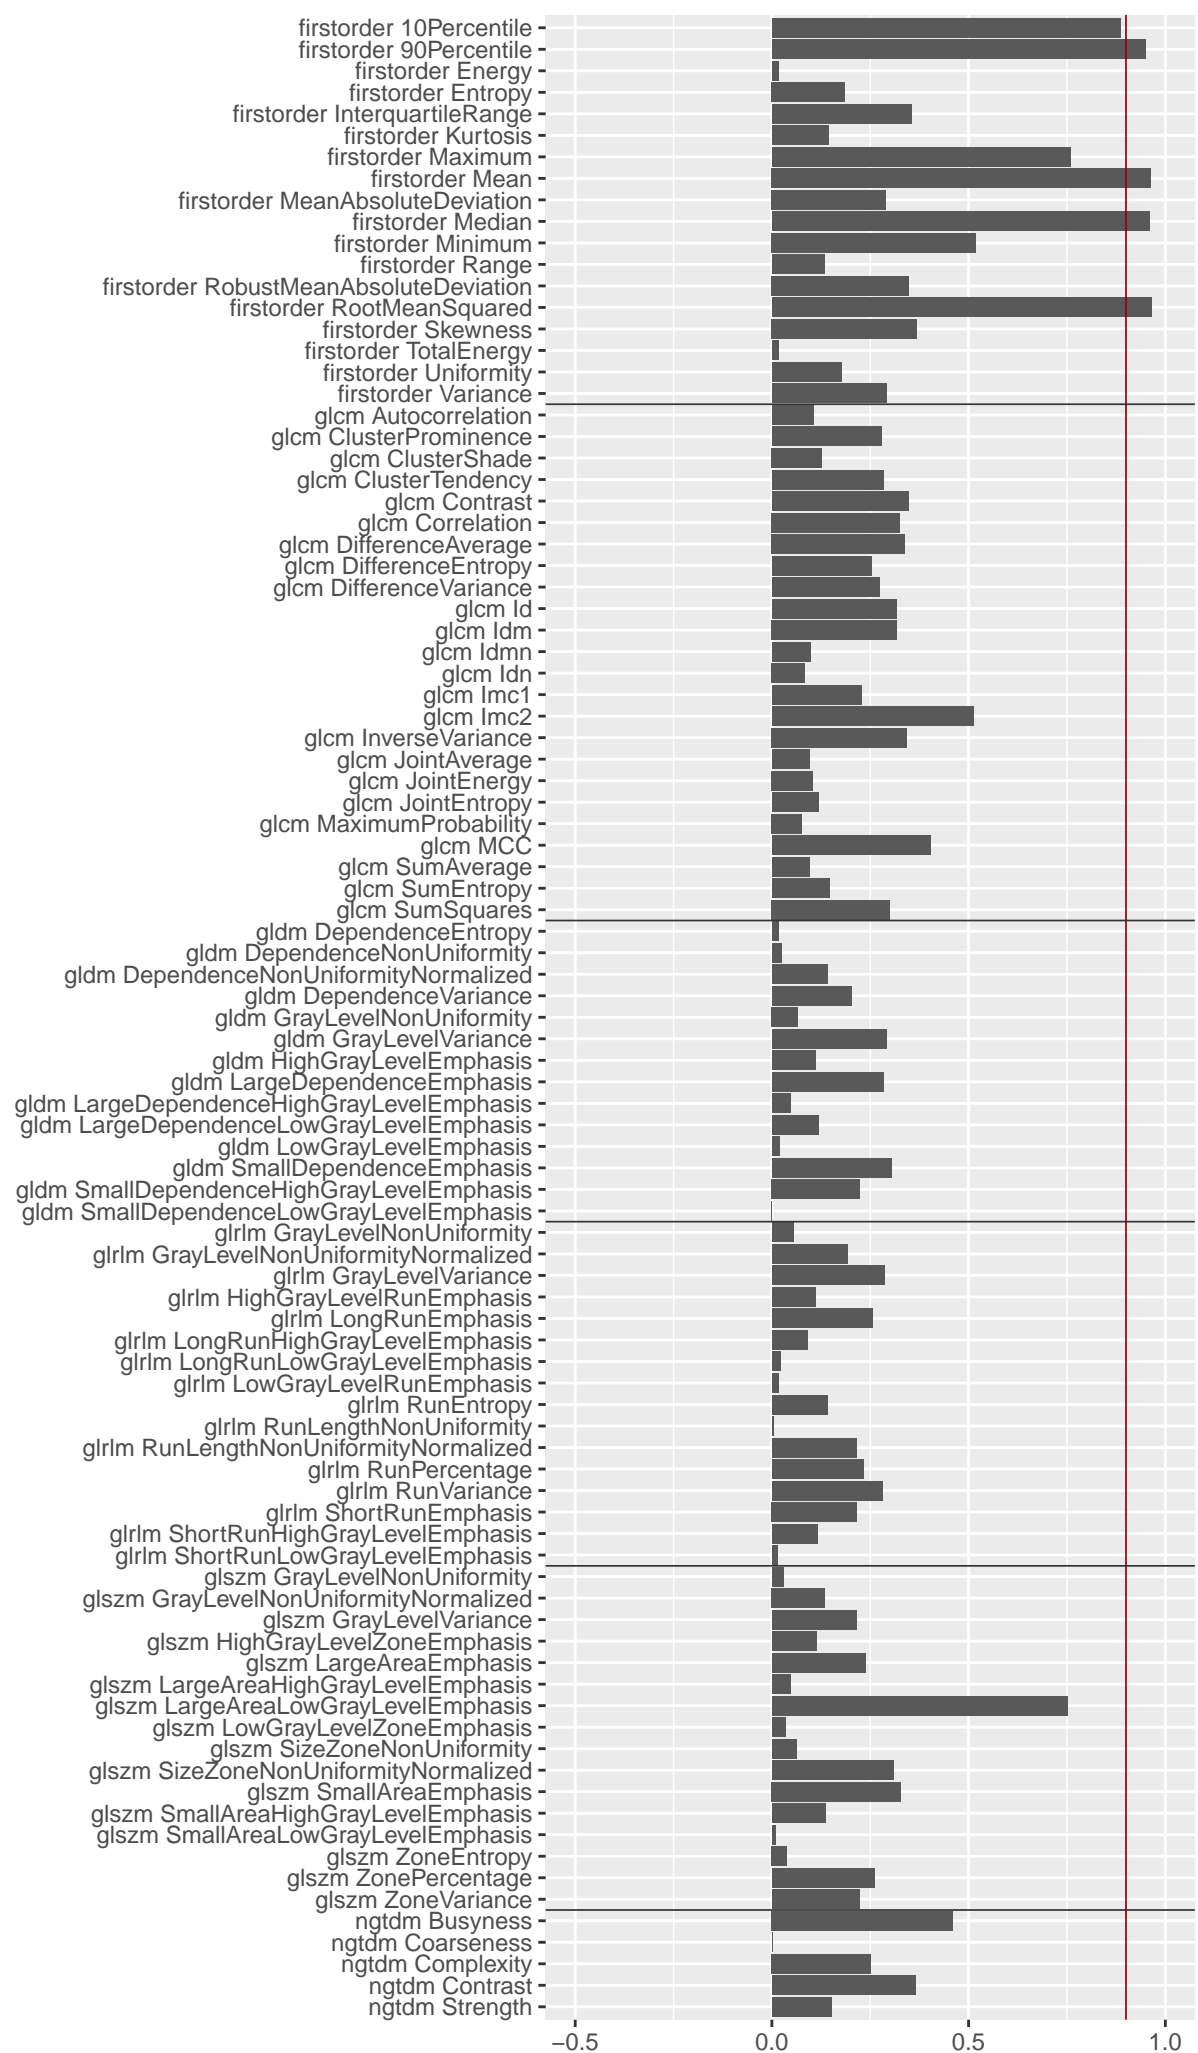

Supplement: s1 [file s1]

# 3 Tesla II – Haste – 10 / 20 mm

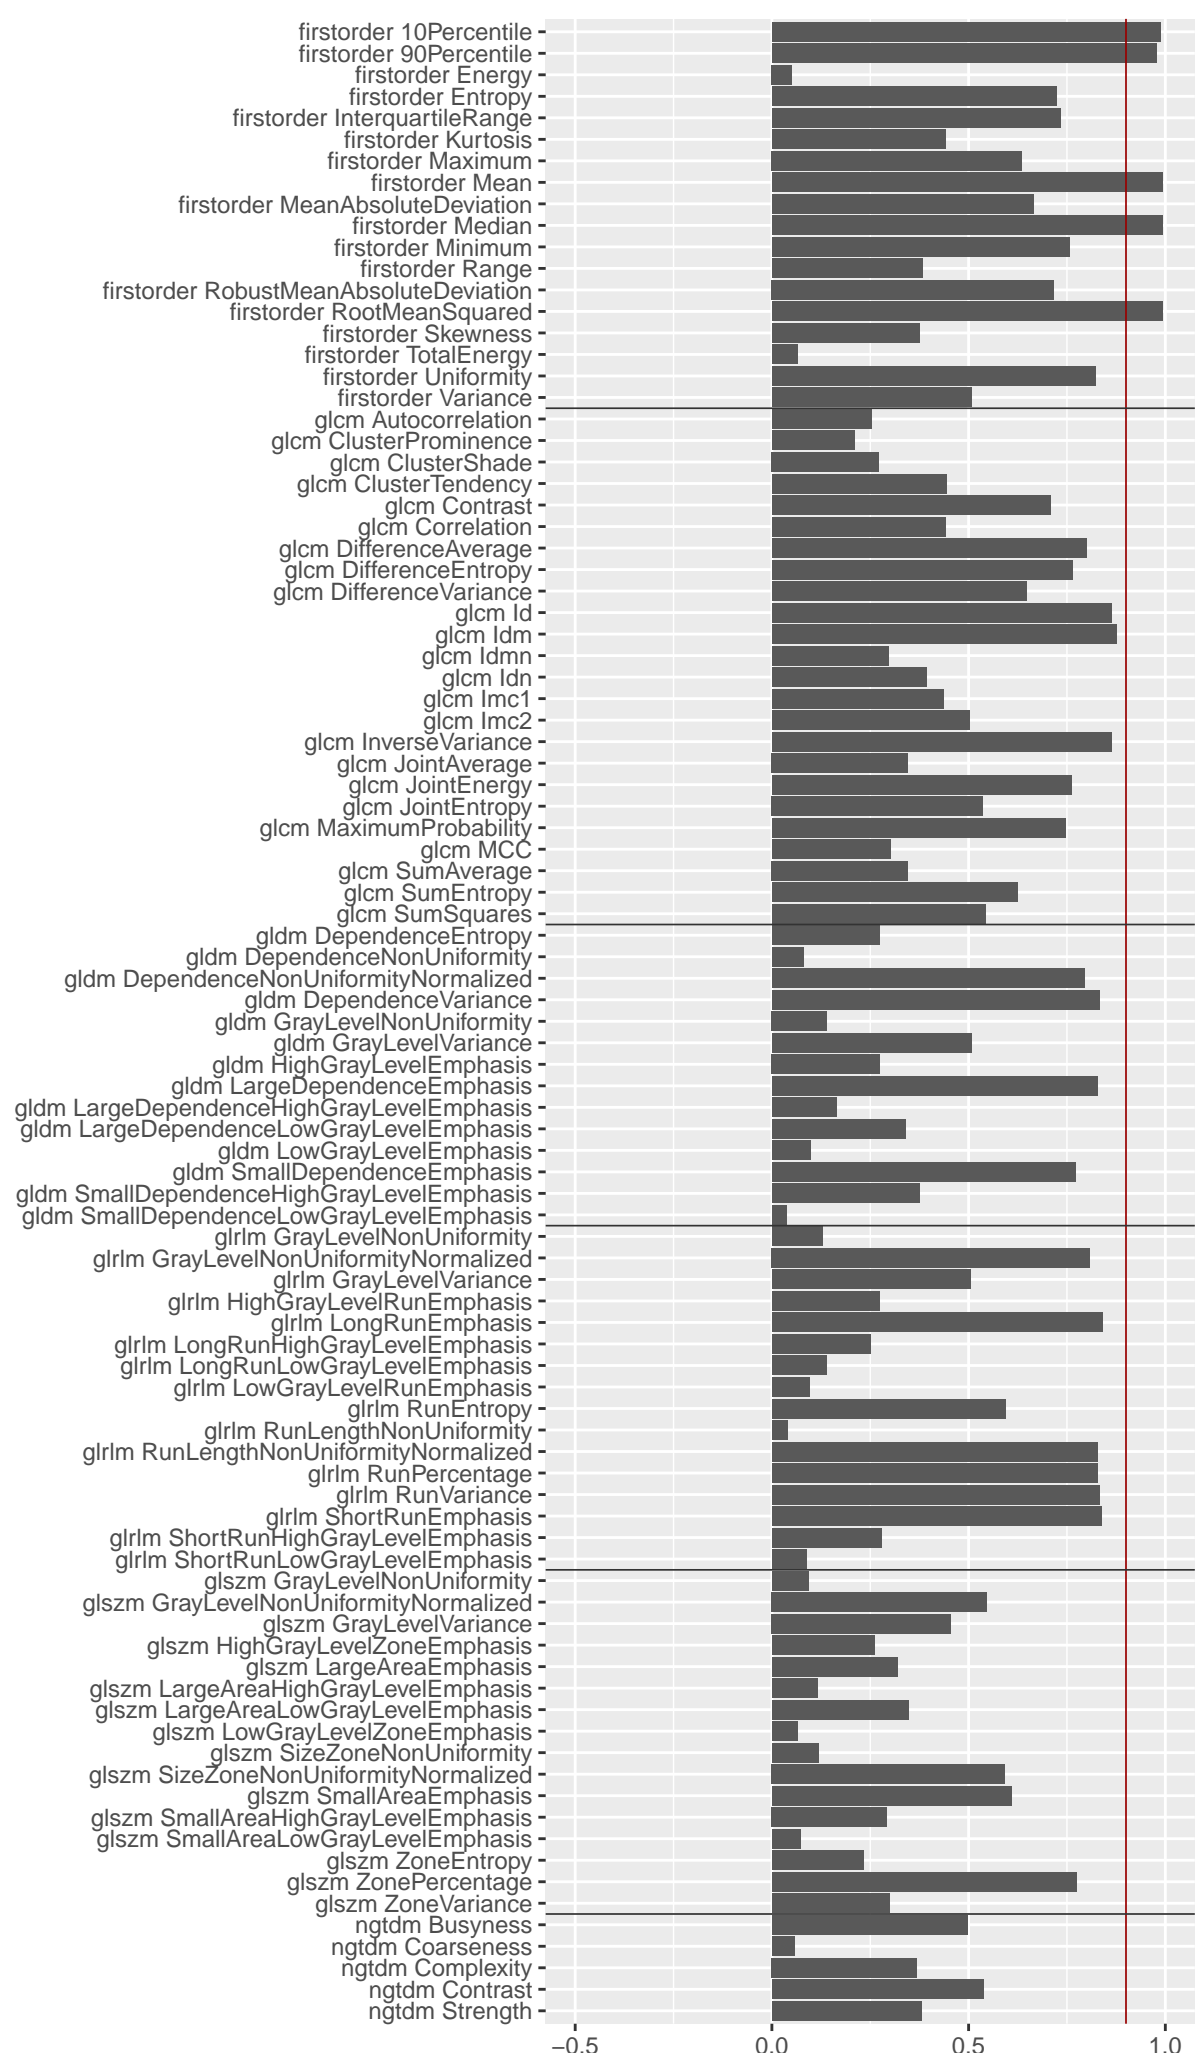

Supplement: s1 [file s1]

# 1.5 Tesla – Haste – 10 / 20 mm

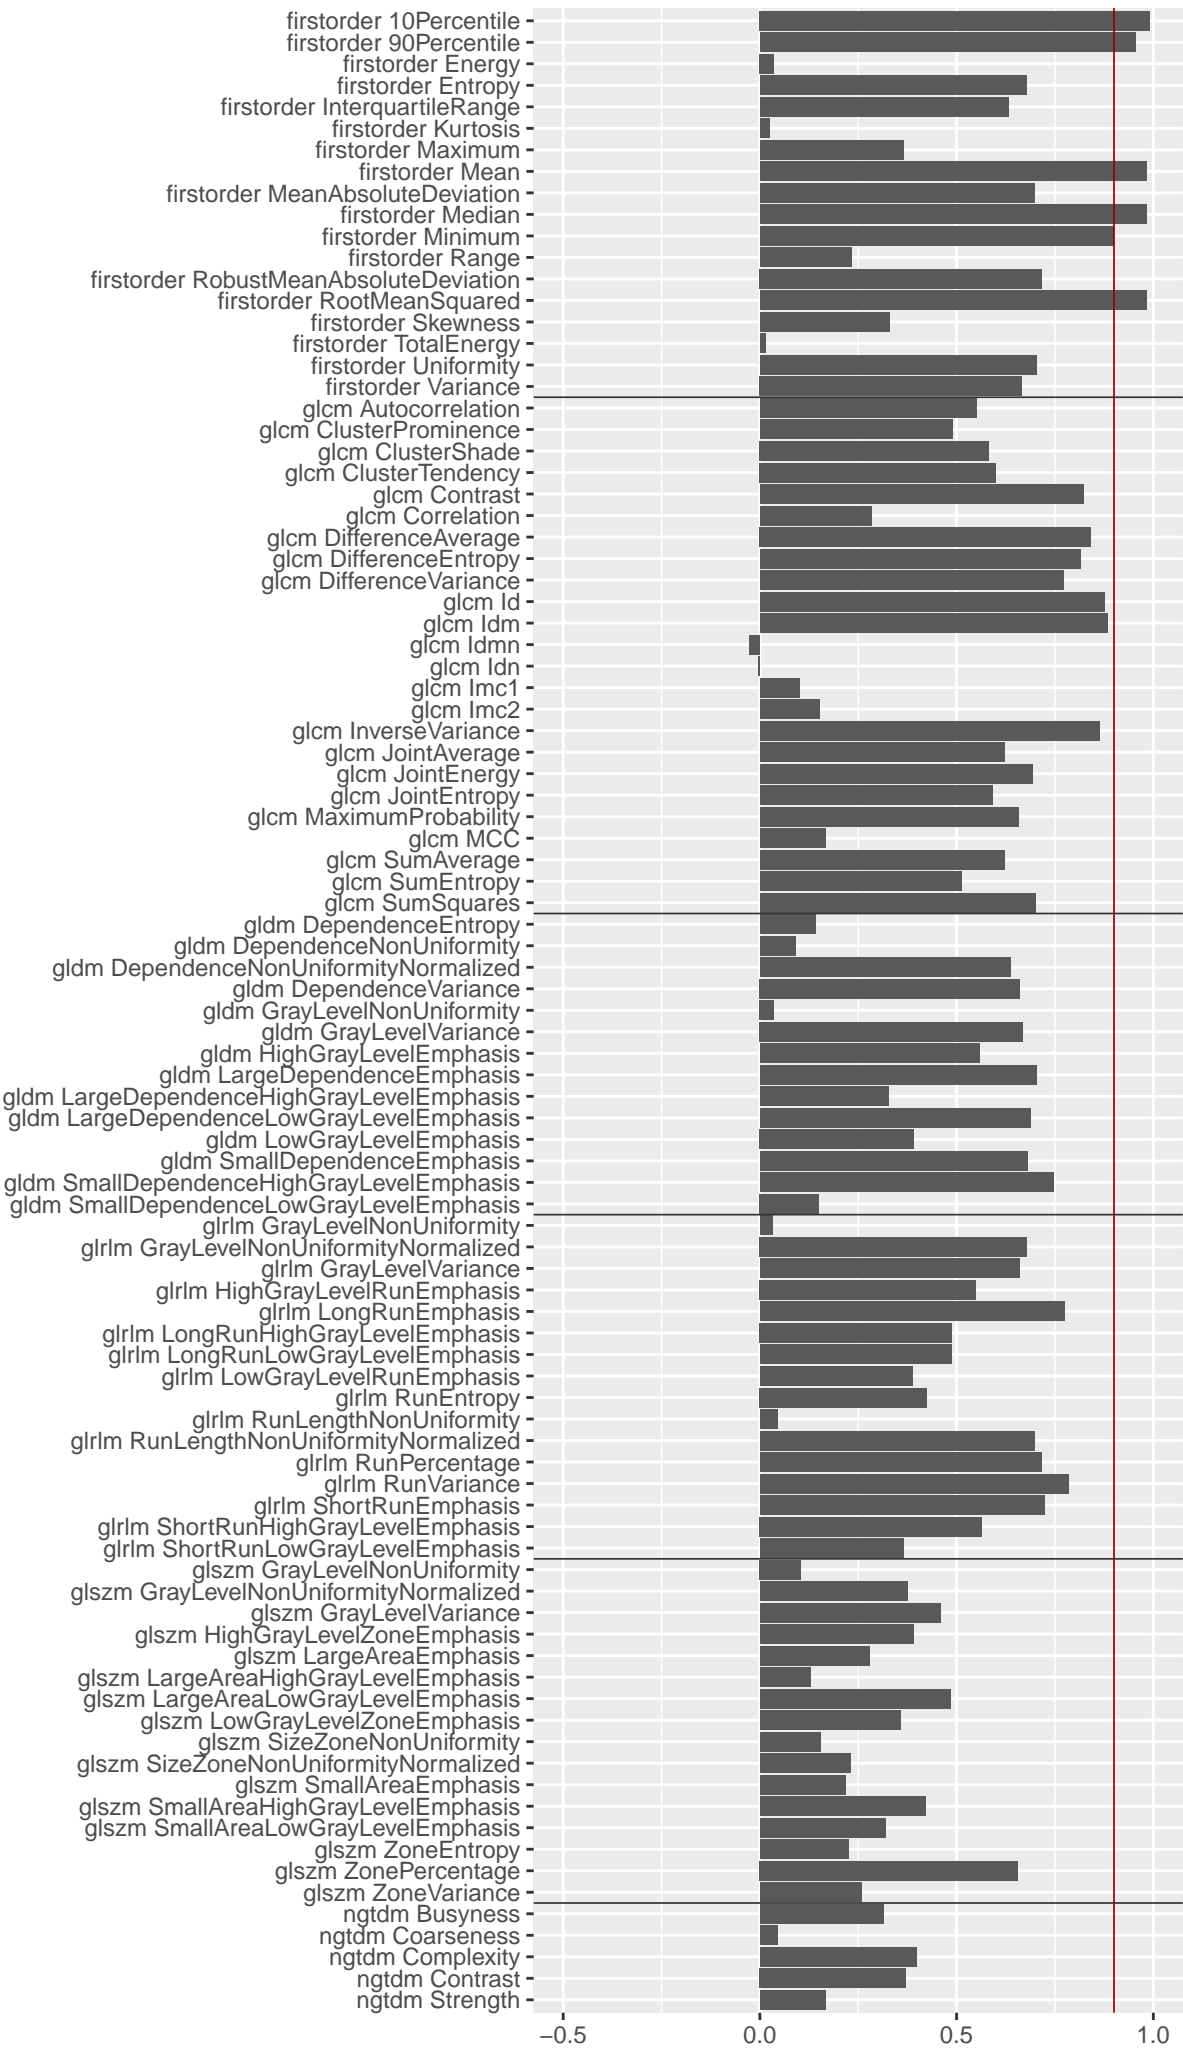

Supplement: s1 [file s1]

# 3 Tesla I – Haste – 10 / 20 mm

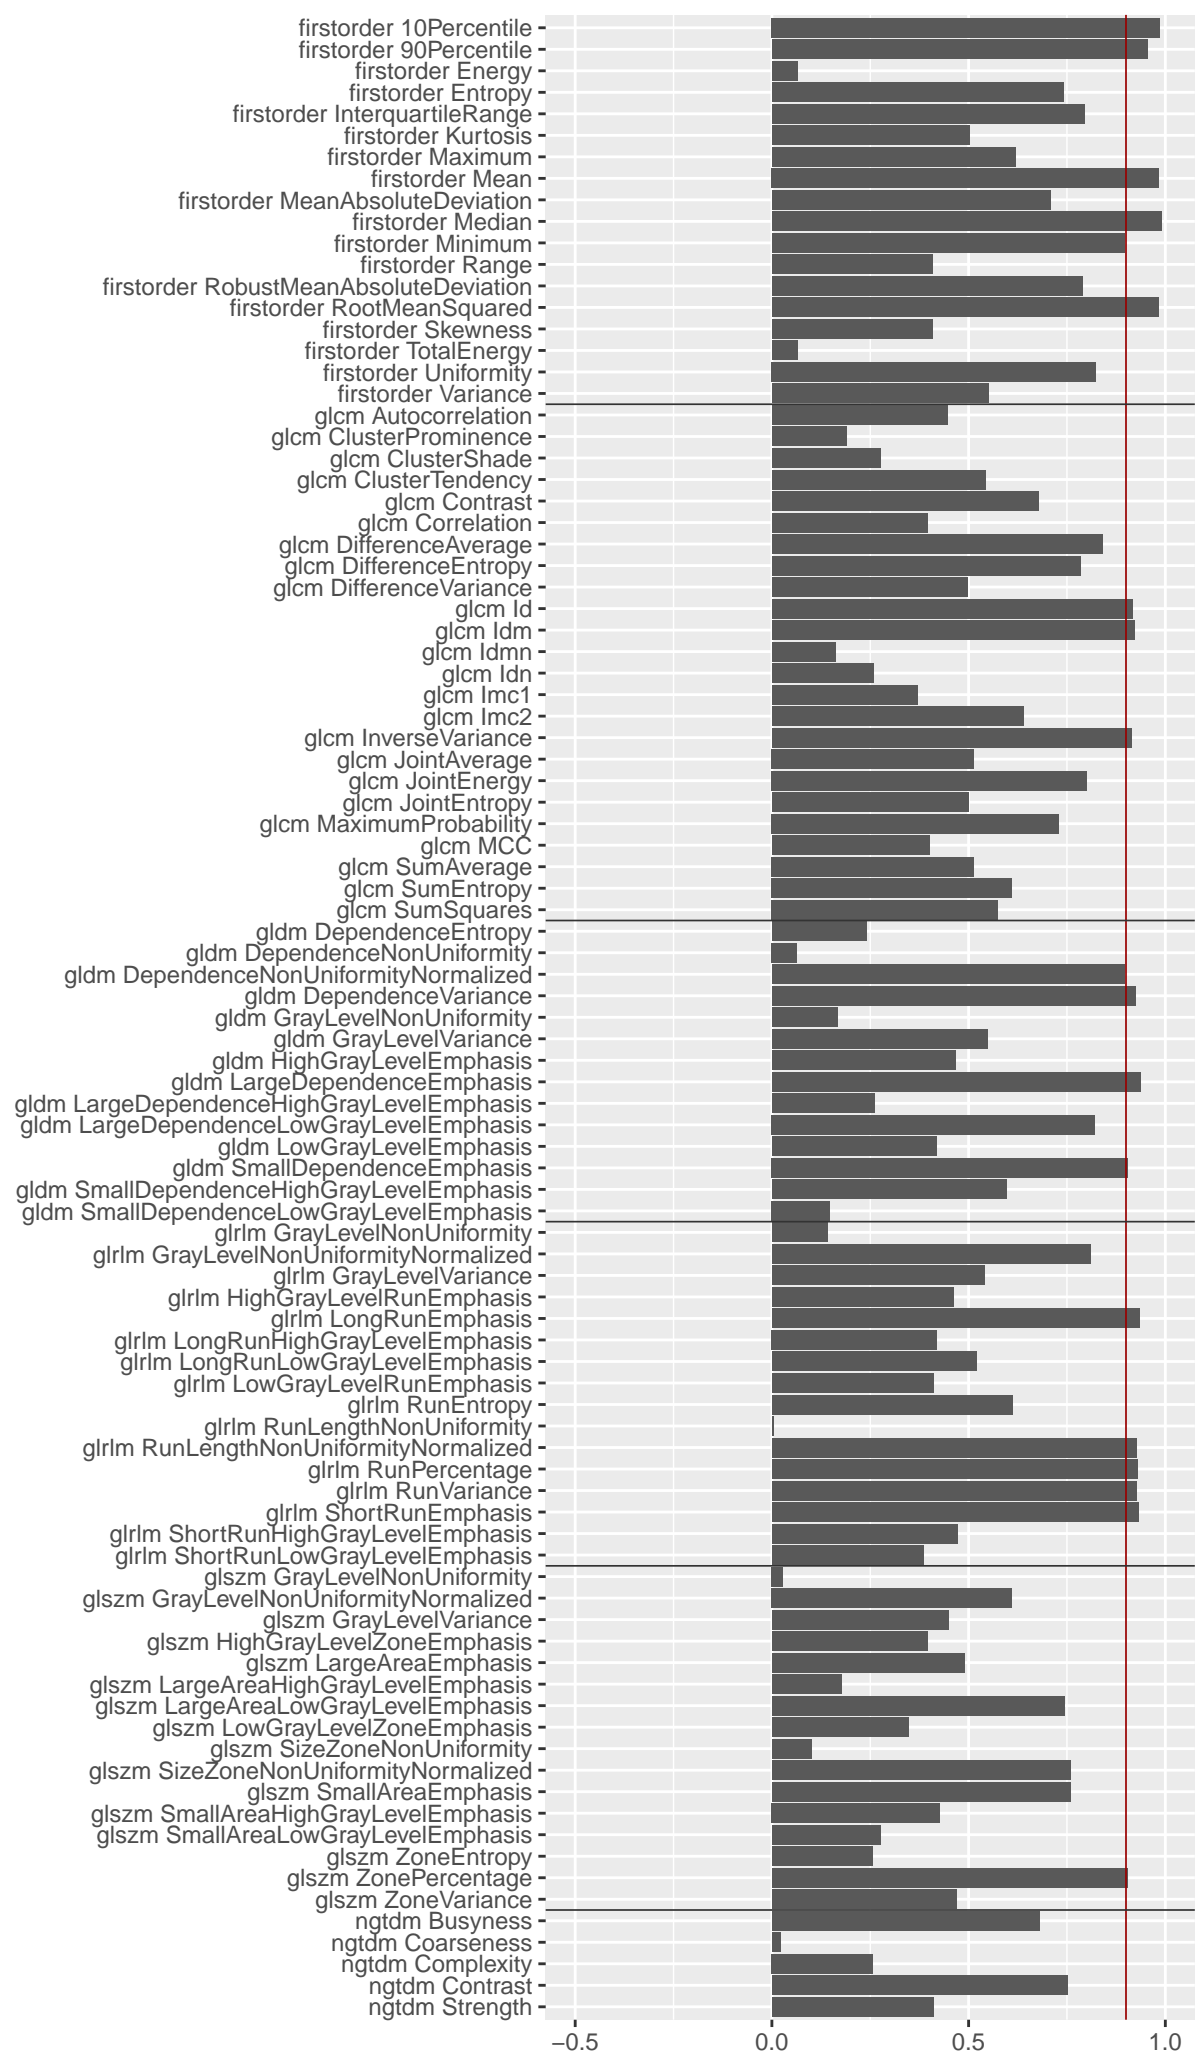

Supplement: s1 [file s1]

# 1.5 Tesla – Flash – 10 / 20 mm

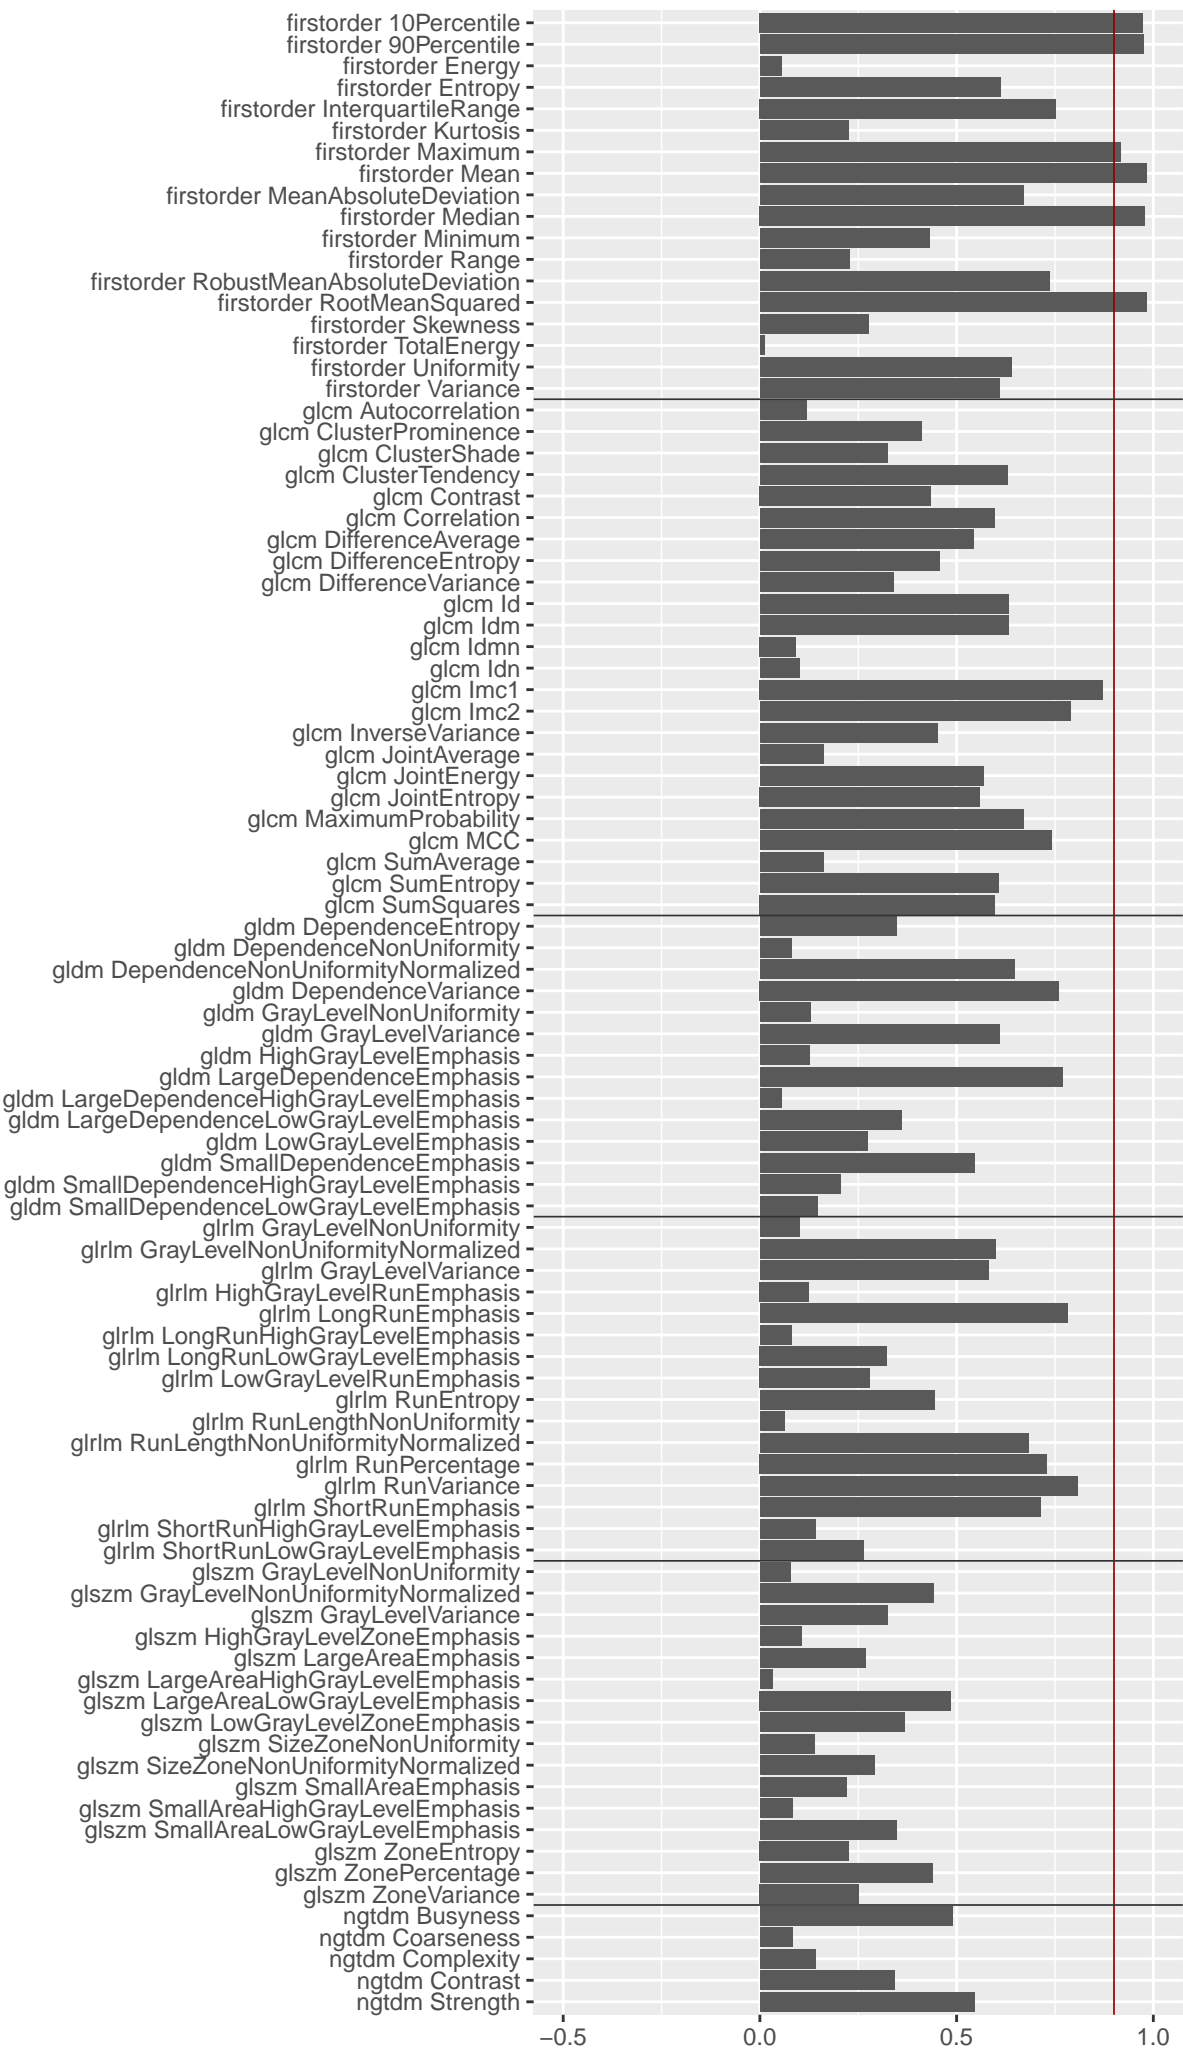

Supplement: s1 [file s1]

# 1.5 Tesla – Flash – 10 / 20 / 30 mm

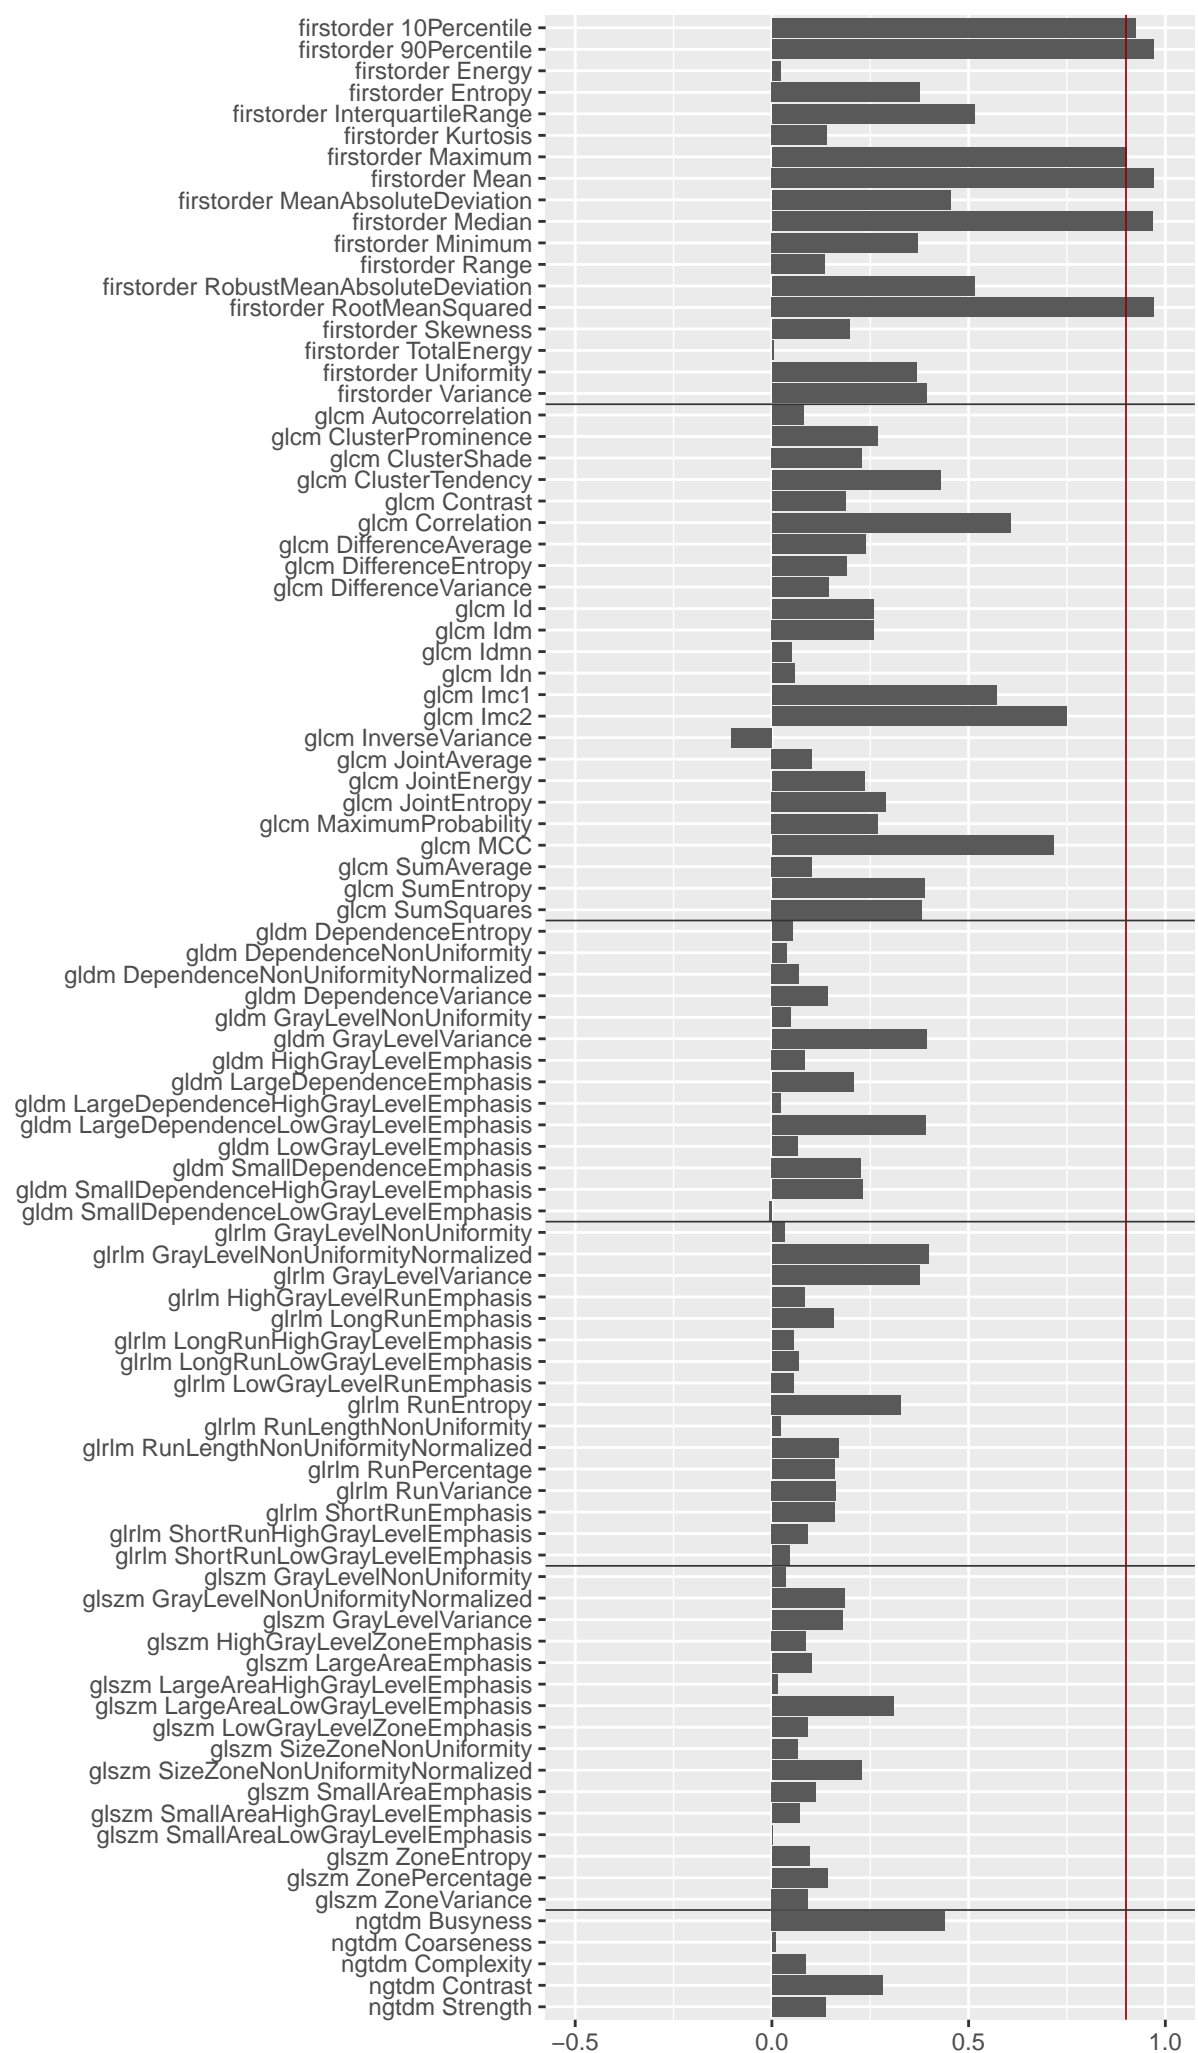

Supplement: s1 [file s1]

# 1.5 Tesla – Haste – 10 / 20 / 30 mm

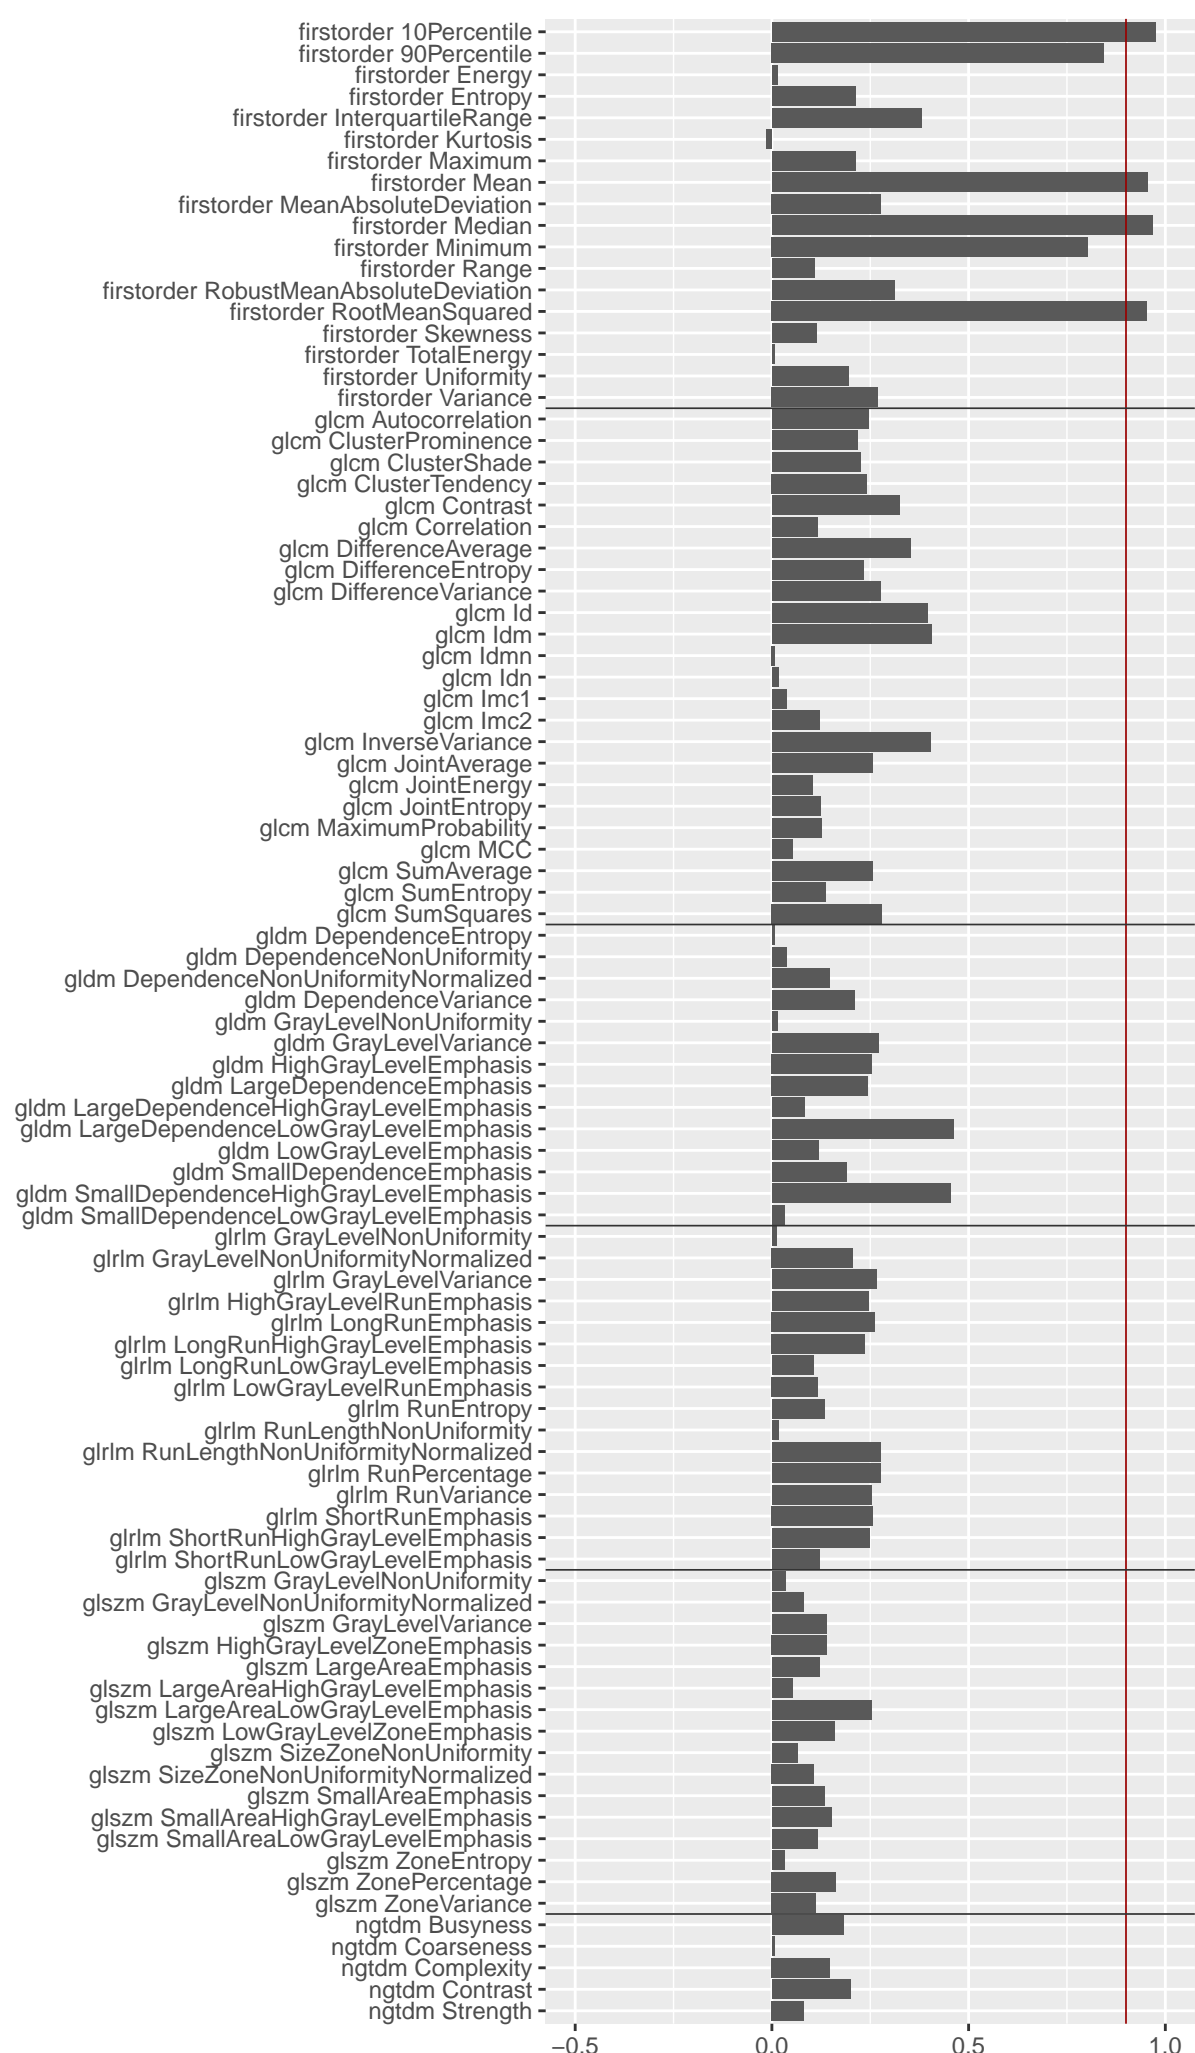

Supplement: s1 [file s1]
